# Supplementary material for: Predicting Mental Health From Followed Accounts on Twitter
Source: Oxford University Press journal article supplement (doi:10.1525/collabra.18731), 2021-01-01
Supplement: collabra_2021_7_1_18731_49475.docx [file collabra_2021_7_1_18731_49475.docx]

We examined the interpretability of all of the models, but focus on the (selected) random forest models in this document. The interpretability of these models was assessed by examining the importance scores of the various accounts alongside their zero-order correlations with the corresponding self-reports. The most correlated accounts are a good supplement to importance scores for three reason. First, the betas in relaxed LASSO, the importance scores in Supervised PCA, and the betas in two-step PCR are all related to the covariance between the predictor and outcome; correlations thus provide a convenient comparison. Second, zero-order correlations have been used to make sense of predictive modeling results in prior work (e.g., Kosinski et al., 2013). Third, they are signed (positive or negative), providing some indication of whether accounts are associated with higher or lower scores on the mental health variables.

***Interpreting models predicting depression*.** The importance scores for predicting depression from the selected random forest model are shown alongside zero-order correlations in Supplemental Table S1. For this particular model, the 10 most important accounts and their zero-order correlations with self-reported depression were (in order) ‘@mommymatter (a parenting blog; *r* = .07), ‘@JaidenAnimation’ (an animator and youtuber; *r =* .06), ‘@SanitySuburbia’ (a parenting/lifestyle blog; *r* = .11), ‘@BarackObama’ (former US president; *r* = .05), ‘@nicepeter’ (youtuber, creator ‘epic rap battles of history’; *r*  = .08), two accounts that were not searchable at the time of data acquisition, ‘@Lilpeep’ (a rapper famous for an emo-style, known to suffer from depression and bipolar disorder; *r* = .12), ‘@RobLowe’ (an actor; *r* = .11), ‘@pennjillette’ (magician, entertainer; *r* = .00), and ‘@tomdelonge’ (rock artist; *r* = .03). Thematically, these accounts included two parenting blogs, one political account, and several prominent figures form music, TV, film, and youtube.

***Interpreting models predicting anxiety*.** The importance scores for predicting anxiety from the selected random forest model are shown alongside zero-order correlations in Supplemental Table S1. The 10 most important accounts and their zero-order correlations with self-reported anxiety were (in order) ‘@VP44’ (archival account from Vice President Joe Biden; *r* = .02), ‘@rafflecopter’ (a sweepstakes service; *r* = .13), ‘@BillCorbet’ (a writer/actor best known for *Mystery* *Science Theater*; *r* = .10), ‘@BarackObama’ (former US president; *r* = .06), ‘@thatbaldchick’ (a lifestyle blog; *r* = .05), ‘@muse’ (a British alternative rock band ; *r* = .02), ‘@RuPaul’ (drag queen and reality tv star; *r* = .08), an account which was not searchable at the time of data acquisition, and ‘@neiltyson’ (astrophysicist Neil deGrasse Tyson; *r* = .00), and ‘@publichands’ (a political account tweeting about public lands in the US); these are shown in Supplemental Table S1 along with the importance scores and zero-order correlations with all other accounts that met the threshold used by this model (at least 5 followers in the data). Thematically, these top 10 accounts mostly consisted of figures from politics and media; it also included a single lifestyle blog and sweepstakes service.

***Interpreting models predicting post-traumatic stress.*** The importance scores for predicting post-traumatic stress from the selected random forest model are shown alongside zero-order correlations in Supplemental Table S1. The 10 most important accounts (and their zero-order correlations with post-traumatic stress) in this model were ‘@BillNye’ (*the science guy*, a TV host; *r* = .09), ‘@HIDEO_KOJIMA_EN’ (a videogame creator; *r* = .10), ‘@DwightHoward’ (a basketball player; *r* = -.02), ‘@iamwandasykes’ (comedian and actor Wanda Sykes; *r* = .12), ‘@TrevorProject’ (a suicide prevention and crisis intervention group for LGBTQ youth; *r* = .08), ‘@ajcampos01’ (a very popular account that appears to mostly post tech reviews, in Portuguese; *r* = .10), ‘@ThriftyJinxy’ (a lifestyle blog; *r*= .11), ‘@NOH8Campaign’ (a campaign started for LGBTQ rights, expanded to fight discrimination broadly; *r* = .13), ‘@DesiPerkins’ (a youtuber focused on makeup; *r* = .12), ‘@SanitySuburbia’ (a parenting/lifestyle blog; *r* = .14). Importance scores and zero-order correlations for these and the rest of the accounts that met the feature selection threshold of at least 5 followers in the data are shown in Supplemental Table S1. Thematically, these highly important accounts included several celebrities, lifestyle blogs, and two LGBTQ advocacy organizations.

***Interpreting models predicting anger.*** The importance scores for predicting anger from the selected random forest model are shown alongside zero-order correlations in Supplemental Table S1; note that this model used a less strict filter (4 or more followers in the data) than the models for the other three variables (5 or more followers in the data), so there are more accounts with importance scores and correlations with anger shown in Supplemental Table S1. The 10 most important accounts (and their zero-order correlations with anger) in this model were ‘@Ridiculousness’ (an MTV show on viral videos hosted by Rob Dyrdek; *r* = .14), ‘@MsRebeccaBlack’ (a youtuber and singer; *r* = .13), ‘@warriors’ (the official account for NBA’s Golden State Warriors; *r* = .04), ‘@nojumper’ (a hip-hop podcast; *r* = .08), ‘@Sodapoppintv’ (a videogame streamer), ‘@GillianA’ (account for actress Gillian Anderson; *r* = .13), ‘@pcgamer’ (a computer game news source; *r* = .08), ‘@RealDDP’ (a retired professional wrestler; *r* = -.10), ‘@Terraria_Logic’ (a videogame; *r* = .08), ‘@1jordanbell’ (NBA player; *r* = .11). Importance scores and zero-order correlations for these and the rest of the accounts that met the feature selection threshold of at least 4 followers in the data are shown in Supplemental Table S1. Thematically, videogame-related content was the most represented, followed by athletes, and then other media (e.g., music, acting, etc.).

Supplemental Table S1. Importance Scores from Selected Models and Zero-order Correlations between Self-Reported Mental Health and Followed Accounts

*Note.* There are many blank entries for all but anger at the bottom of the table; this arises from the fact that the selected model for anger used a less strict filter for accounts (4 or more followers in the data) than the others (5 or more followers in the data).

|  | Depression | | Anxiety | | Post-Traumatic Stress | | Anger | |
| --- | --- | --- | --- | --- | --- | --- | --- | --- |
| Account name | Importance | *r* | Importance | *r* | Importance | *r* | Importance | *r* |
| PatMcAfeeShow | 0.001 | -0.138 | 0.000 | -0.104 | 0.000 | -0.046 | 0.000 | -0.061 |
| SportsCenter | 0.000 | -0.126 | 0.001 | -0.104 | 0.000 | -0.083 | 0.000 | -0.067 |
| espn | 0.000 | -0.121 | 0.000 | -0.115 | 0.000 | -0.058 | 0.002 | -0.099 |
| jimrome | 0.000 | -0.116 | 0.000 | -0.130 | 0.001 | -0.096 | 0.000 | -0.062 |
| BarstoolBigCat | 0.006 | -0.115 | 0.000 | -0.090 | 0.000 | -0.098 | 0.000 | -0.079 |
| Rotoworld_FB | 0.013 | -0.115 | 0.000 | -0.123 | 0.001 | -0.125 | 0.000 | -0.105 |
| SoleCollector | 0.000 | -0.106 | 0.016 | -0.083 | 0.000 | -0.096 | 0.000 | -0.084 |
| Ken_Rosenthal | 0.012 | -0.106 | 0.012 | -0.119 | 0.000 | -0.045 | 0.003 | -0.091 |
| Kaepernick7 | 0.000 | -0.105 | 0.000 | -0.077 | 0.000 | -0.066 | 0.000 | -0.038 |
| mortreport | 0.002 | -0.105 | 0.000 | -0.114 | 0.001 | -0.114 | 0.002 | -0.013 |
| MelKiperESPN | 0.003 | -0.103 | 0.000 | -0.138 | 0.000 | -0.092 | 0.000 | -0.045 |
| videogamedeals | 0.000 | -0.100 | 0.000 | -0.081 | 0.000 | -0.040 | 0.000 | -0.022 |
| newbelgium | 0.001 | -0.098 | 0.009 | -0.111 | 0.000 | -0.096 | 0.000 | -0.063 |
| garyvee | 0.000 | -0.097 | 0.000 | -0.065 | 0.000 | -0.065 | 0.000 | -0.022 |
| PFTCommenter | 0.000 | -0.096 | 0.002 | -0.085 | 0.001 | -0.092 | 0.003 | -0.081 |
| KrisBryant_23 | 0.000 | -0.096 | 0.003 | -0.121 | 0.001 | -0.126 | 0.000 | -0.055 |
| id_1305995330 | 0.000 | -0.095 | 0.019 | -0.058 | 0.000 | -0.065 | 0.000 | -0.073 |
| stoolpresidente | 0.000 | -0.095 | 0.000 | -0.049 | 0.000 | -0.078 | 0.000 | -0.070 |
| NFL | 0.000 | -0.094 | 0.000 | -0.105 | 0.000 | -0.064 | 0.000 | -0.044 |
| RobinhoodApp | 0.000 | -0.092 | 0.006 | -0.062 | 0.000 | -0.061 | 0.000 | -0.068 |
| verge | 0.000 | -0.092 | 0.000 | -0.063 | 0.000 | -0.068 | 0.000 | -0.065 |
| KingJames | 0.001 | -0.092 | 0.016 | -0.079 | 0.001 | -0.064 | 0.000 | -0.052 |
| JuddApatow | 0.004 | -0.091 | 0.000 | -0.031 | 0.000 | -0.027 | 0.000 | -0.049 |
| TomiLahren | 0.000 | -0.091 | 0.002 | -0.095 | 0.000 | -0.061 | 0.000 | -0.102 |
| omgthatspunny | 0.001 | -0.091 | 0.000 | -0.075 | 0.000 | -0.090 | 0.000 | -0.041 |
| McShay13 | 0.000 | -0.090 | 0.000 | -0.116 | 0.000 | -0.098 | 0.000 | -0.022 |
| StuartScott | 0.000 | -0.089 | 0.000 | -0.094 | 0.001 | -0.104 | 0.000 | -0.058 |
| ABFalecbaldwin | 0.000 | -0.089 | 0.000 | -0.058 | 0.000 | -0.096 | 0.000 | -0.063 |
| majornelson | 0.000 | -0.088 | 0.000 | -0.047 | 0.000 | -0.081 | 0.000 | -0.027 |
| LanceBass | 0.000 | -0.086 | 0.000 | -0.046 | 0.000 | -0.018 | 0.000 | -0.079 |
| BostonTweet | 0.000 | -0.086 | 0.000 | -0.029 | 0.000 | -0.057 | 0.000 | -0.063 |
| GoPro | 0.000 | -0.086 | 0.000 | -0.056 | 0.000 | -0.009 | 0.000 | -0.020 |
| ABCSharkTank | 0.000 | -0.085 | 0.001 | -0.043 | 0.000 | -0.083 | 0.000 | -0.074 |
| Medium | 0.004 | -0.084 | 0.000 | -0.027 | 0.000 | -0.055 | 0.005 | -0.099 |
| drewmagary | 0.000 | -0.084 | 0.006 | -0.083 | 0.000 | -0.096 | 0.000 | -0.047 |
| snopes | 0.000 | -0.084 | 0.000 | -0.066 | 0.001 | -0.041 | 0.000 | -0.110 |
| JohnClaytonNFL | 0.004 | -0.083 | 0.027 | -0.104 | 0.000 | -0.053 | 0.000 | 0.005 |
| BlizzHeroes | 0.003 | -0.083 | 0.000 | -0.028 | 0.001 | -0.018 | 0.000 | -0.031 |
| Drake | 0.008 | -0.083 | 0.000 | -0.029 | 0.000 | -0.008 | 0.008 | -0.042 |
| NHLBlackhawks | 0.000 | -0.083 | 0.001 | -0.080 | 0.000 | -0.058 | 0.000 | -0.048 |
| LaurenConrad | 0.000 | -0.083 | 0.000 | -0.010 | 0.000 | -0.065 | 0.000 | 0.004 |
| scottsflights | 0.000 | -0.082 | 0.003 | -0.091 | 0.000 | -0.047 | 0.004 | -0.038 |
| lootcrate | 0.012 | -0.082 | 0.000 | -0.066 | 0.000 | -0.052 | 0.000 | -0.073 |
| androidcentral | 0.000 | -0.081 | 0.004 | -0.017 | 0.000 | -0.069 | 0.000 | 0.031 |
| DemSocialists | 0.000 | -0.081 | 0.000 | -0.069 | 0.000 | -0.065 | 0.000 | -0.047 |
| InternetHippo | 0.000 | -0.081 | 0.006 | -0.063 | 0.000 | -0.081 | 0.000 | -0.120 |
| NorthernlionLP | 0.000 | -0.080 | 0.000 | -0.118 | 0.000 | -0.025 | 0.002 | -0.075 |
| TheWalkingDead | 0.004 | -0.080 | 0.003 | -0.072 | 0.000 | -0.083 | 0.000 | -0.060 |
| Reds | 0.000 | -0.080 | 0.000 | -0.067 | 0.000 | -0.039 | 0.000 | -0.074 |
| LilTunechi | 0.008 | -0.080 | 0.013 | -0.050 | 0.000 | -0.063 | 0.002 | -0.005 |
| obj | 0.002 | -0.080 | 0.004 | -0.085 | 0.000 | -0.090 | 0.000 | -0.062 |
| TheFakeESPN | 0.000 | -0.079 | 0.010 | -0.075 | 0.000 | -0.051 | 0.000 | -0.017 |
| gucci1017 | 0.000 | -0.079 | 0.000 | -0.066 | 0.000 | -0.054 | 0.000 | -0.026 |
| Cubs | 0.001 | -0.079 | 0.000 | -0.076 | 0.000 | -0.047 | 0.000 | -0.016 |
| MatthewBerryTMR | 0.000 | -0.079 | 0.001 | -0.068 | 0.000 | -0.059 | 0.001 | -0.027 |
| StateDept | 0.000 | -0.078 | 0.000 | -0.087 | 0.000 | -0.058 | 0.000 | -0.097 |
| JArrieta34 | 0.000 | -0.078 | 0.009 | -0.097 | 0.000 | -0.096 | 0.000 | -0.053 |
| thesulk | 0.000 | -0.078 | 0.000 | -0.063 | 0.000 | -0.120 | 0.000 | -0.068 |
| PopSci | 0.001 | -0.078 | 0.000 | -0.059 | 0.000 | -0.025 | 0.000 | -0.060 |
| Lamp | 0.000 | -0.078 | 0.000 | -0.028 | 0.000 | -0.047 | 0.000 | 0.002 |
| whitegrlproblem | 0.000 | -0.078 | 0.005 | -0.025 | 0.000 | -0.083 | 0.000 | -0.031 |
| NFL_Memes | 0.006 | -0.077 | 0.003 | -0.109 | 0.000 | -0.101 | 0.000 | -0.081 |
| PardonMyTake | 0.000 | -0.077 | 0.000 | -0.070 | 0.000 | -0.060 | 0.001 | -0.046 |
| adamlevine | 0.000 | -0.077 | 0.000 | -0.050 | 0.000 | -0.070 | 0.002 | -0.057 |
| ProFootballTalk | 0.000 | -0.077 | 0.000 | -0.086 | 0.000 | -0.054 | 0.000 | -0.004 |
| Newcastle | 0.000 | -0.076 | 0.003 | -0.107 | 0.000 | -0.044 | 0.000 | -0.076 |
| JohnTheCho | 0.000 | -0.076 | 0.000 | -0.065 | 0.000 | -0.025 | 0.000 | -0.051 |
| stephenasmith | 0.000 | -0.076 | 0.000 | -0.079 | 0.000 | -0.027 | 0.000 | -0.086 |
| DanBilzerian | 0.005 | -0.076 | 0.000 | -0.040 | 0.000 | 0.026 | 0.000 | 0.006 |
| ElderScrolls | 0.000 | -0.076 | 0.007 | -0.097 | 0.000 | -0.078 | 0.004 | -0.066 |
| JimmyTatro | 0.003 | -0.076 | 0.000 | -0.022 | 0.000 | 0.008 | 0.000 | -0.048 |
| notthefakeSVP | 0.001 | -0.075 | 0.000 | -0.063 | 0.000 | -0.069 | 0.004 | -0.047 |
| SportsNation | 0.000 | -0.075 | 0.000 | -0.027 | 0.001 | -0.040 | 0.000 | -0.063 |
| shitgirlssay | 0.002 | -0.075 | 0.000 | -0.039 | 0.000 | -0.101 | 0.000 | -0.031 |
| blakeshelton | 0.005 | -0.075 | 0.001 | -0.009 | 0.000 | -0.096 | 0.000 | -0.003 |
| JasonLaCanfora | 0.000 | -0.075 | 0.006 | -0.088 | 0.000 | -0.068 | 0.000 | -0.007 |
| PrettyLights | 0.002 | -0.075 | 0.000 | -0.069 | 0.000 | -0.081 | 0.002 | -0.073 |
| USNavy | 0.000 | -0.075 | 0.000 | -0.063 | 0.000 | -0.057 | 0.000 | -0.073 |
| Gawker | 0.000 | -0.075 | 0.000 | -0.049 | 0.000 | -0.057 | 0.009 | -0.058 |
| nflnetwork | 0.003 | -0.075 | 0.000 | -0.114 | 0.000 | -0.059 | 0.000 | -0.023 |
| TeamUSA | 0.000 | -0.075 | 0.004 | -0.048 | 0.000 | -0.120 | 0.000 | -0.060 |
| alexmorgan13 | 0.000 | -0.075 | 0.000 | -0.019 | 0.000 | -0.008 | 0.000 | 0.010 |
| AdamSchefter | 0.000 | -0.074 | 0.000 | -0.110 | 0.002 | -0.119 | 0.005 | -0.091 |
| coinbase | 0.010 | -0.074 | 0.000 | -0.044 | 0.000 | -0.015 | 0.003 | -0.044 |
| elgatogaming | 0.000 | -0.074 | 0.000 | -0.087 | 0.001 | -0.100 | 0.000 | -0.099 |
| msiUSA | 0.004 | -0.074 | 0.000 | -0.066 | 0.000 | -0.085 | 0.000 | 0.001 |
| NatGeo | 0.000 | -0.073 | 0.007 | -0.037 | 0.000 | -0.073 | 0.000 | -0.052 |
| cenkuygur | 0.000 | -0.073 | 0.000 | -0.037 | 0.000 | -0.018 | 0.000 | -0.035 |
| tedcruz | 0.000 | -0.073 | 0.000 | -0.031 | 0.000 | -0.004 | 0.000 | 0.021 |
| UncleChaps | 0.000 | -0.072 | 0.000 | -0.043 | 0.000 | -0.073 | 0.000 | -0.042 |
| republicwirelss | 0.000 | -0.072 | 0.000 | -0.041 | 0.000 | -0.065 | 0.000 | -0.042 |
| SInow | 0.000 | -0.072 | 0.000 | -0.076 | 0.002 | -0.081 | 0.000 | -0.055 |
| bobatl | 0.004 | -0.072 | 0.000 | -0.047 | 0.000 | -0.069 | 0.000 | -0.010 |
| Starbucks | 0.005 | -0.071 | 0.000 | -0.020 | 0.000 | -0.055 | 0.000 | -0.054 |
| AmznMovieRevws | 0.007 | -0.071 | 0.000 | -0.065 | 0.000 | -0.118 | 0.000 | -0.062 |
| ryenarussillo | 0.004 | -0.071 | 0.000 | -0.065 | 0.000 | -0.045 | 0.000 | -0.040 |
| USPSHelp | 0.000 | -0.071 | 0.000 | -0.039 | 0.000 | 0.022 | 0.000 | 0.013 |
| SICKOFWOLVES | 0.002 | -0.071 | 0.002 | -0.074 | 0.000 | -0.075 | 0.000 | -0.060 |
| BigSean | 0.002 | -0.070 | 0.017 | -0.056 | 0.000 | -0.045 | 0.000 | -0.007 |
| steinersports | 0.002 | -0.070 | 0.000 | -0.062 | 0.000 | -0.061 | 0.000 | -0.022 |
| FactsOfSchool | 0.005 | -0.070 | 0.001 | -0.041 | 0.000 | -0.054 | 0.000 | 0.012 |
| McIlroyRory | 0.006 | -0.070 | 0.000 | -0.076 | 0.000 | -0.125 | 0.000 | -0.076 |
| Twitch | 0.000 | -0.070 | 0.000 | -0.057 | 0.000 | -0.038 | 0.001 | -0.044 |
| thecampaignbook | 0.001 | -0.069 | 0.000 | -0.083 | 0.000 | -0.049 | 0.000 | -0.068 |
| sacca | 0.004 | -0.069 | 0.002 | -0.072 | 0.000 | -0.073 | 0.000 | -0.042 |
| Timeflies | 0.000 | -0.069 | 0.000 | -0.035 | 0.001 | -0.088 | 0.000 | -0.006 |
| wordstionary | 0.004 | -0.069 | 0.006 | -0.018 | 0.000 | -0.026 | 0.000 | 0.004 |
| jonas_ent | 0.000 | -0.069 | 0.009 | -0.015 | 0.000 | -0.018 | 0.000 | -0.037 |
| DeptofDefense | 0.002 | -0.068 | 0.008 | -0.068 | 0.000 | -0.032 | 0.000 | -0.018 |
| mtaibbi | 0.000 | -0.068 | 0.000 | -0.051 | 0.000 | -0.091 | 0.000 | -0.048 |
| CMPunk | 0.003 | -0.068 | 0.000 | -0.044 | 0.000 | -0.045 | 0.004 | -0.013 |
| TheFunnyVines | 0.009 | -0.068 | 0.000 | -0.034 | 0.000 | -0.032 | 0.000 | -0.031 |
| thehill | 0.000 | -0.068 | 0.009 | 0.007 | 0.000 | -0.016 | 0.000 | -0.008 |
| MLB | 0.000 | -0.068 | 0.000 | -0.074 | 0.000 | -0.069 | 0.011 | -0.040 |
| UrbanOutfitters | 0.000 | -0.067 | 0.000 | -0.049 | 0.000 | -0.093 | 0.000 | -0.051 |
| SFGiants | 0.000 | -0.067 | 0.000 | -0.049 | 0.000 | 0.018 | 0.000 | -0.074 |
| brielarson | 0.000 | -0.067 | 0.028 | -0.033 | 0.000 | -0.004 | 0.001 | -0.064 |
| TomHall | 0.000 | -0.067 | 0.002 | -0.092 | 0.000 | -0.073 | 0.000 | -0.099 |
| YahooFantasy | 0.002 | -0.067 | 0.000 | -0.080 | 0.000 | -0.088 | 0.005 | -0.037 |
| BillKristol | 0.010 | -0.067 | 0.000 | -0.049 | 0.000 | -0.096 | 0.000 | -0.068 |
| DierksBentley | 0.000 | -0.067 | 0.000 | -0.043 | 0.000 | -0.081 | 0.005 | -0.089 |
| wideopencountry | 0.000 | -0.067 | 0.003 | 0.019 | 0.000 | -0.002 | 0.000 | 0.036 |
| AMDGaming | 0.000 | -0.067 | 0.000 | -0.085 | 0.000 | -0.104 | 0.000 | -0.002 |
| CornelWest | 0.000 | -0.067 | 0.002 | -0.072 | 0.000 | -0.025 | 0.001 | -0.045 |
| Dame_Lillard | 0.006 | -0.067 | 0.000 | -0.044 | 0.000 | -0.031 | 0.004 | -0.008 |
| arstechnica | 0.000 | -0.066 | 0.000 | -0.044 | 0.000 | -0.036 | 0.000 | -0.013 |
| IssaRae | 0.000 | -0.066 | 0.003 | -0.070 | 0.000 | -0.078 | 0.000 | -0.062 |
| feedme | 0.000 | -0.066 | 0.007 | -0.063 | 0.000 | -0.091 | 0.000 | -0.075 |
| VINNYGUADAGNINO | 0.000 | -0.066 | 0.003 | -0.041 | 0.000 | -0.058 | 0.000 | -0.018 |
| sapinker | 0.000 | -0.065 | 0.000 | -0.006 | 0.000 | -0.006 | 0.000 | -0.026 |
| LogitechG | 0.000 | -0.065 | 0.000 | -0.080 | 0.000 | -0.104 | 0.000 | -0.093 |
| primestudent | 0.001 | -0.065 | 0.001 | -0.026 | 0.000 | -0.018 | 0.000 | -0.049 |
| Monstercat | 0.000 | -0.065 | 0.000 | -0.090 | 0.000 | -0.061 | 0.015 | -0.117 |
| CoachJim4UM | 0.000 | -0.065 | 0.002 | -0.082 | 0.000 | -0.061 | 0.000 | -0.007 |
| michaelb4jordan | 0.002 | -0.065 | 0.000 | -0.041 | 0.000 | -0.054 | 0.004 | 0.016 |
| brianstelter | 0.003 | -0.065 | 0.000 | -0.036 | 0.000 | -0.097 | 0.000 | -0.060 |
| RobertsEmma | 0.000 | -0.065 | 0.000 | -0.028 | 0.000 | -0.013 | 0.000 | 0.008 |
| justinbieber | 0.000 | -0.064 | 0.000 | -0.001 | 0.000 | -0.070 | 0.000 | -0.012 |
| Yankees | 0.000 | -0.064 | 0.003 | -0.055 | 0.000 | -0.049 | 0.000 | -0.016 |
| RonPaul | 0.000 | -0.064 | 0.000 | -0.046 | 0.000 | -0.018 | 0.000 | -0.047 |
| imteddybless | 0.001 | -0.064 | 0.007 | -0.041 | 0.000 | -0.057 | 0.000 | -0.047 |
| RonanFarrow | 0.000 | -0.064 | 0.000 | -0.009 | 0.000 | -0.041 | 0.000 | -0.053 |
| ScottRogowsky | 0.000 | -0.064 | 0.008 | -0.070 | 0.000 | -0.038 | 0.000 | -0.066 |
| lilyallen | 0.000 | -0.064 | 0.000 | -0.053 | 0.000 | -0.018 | 0.000 | -0.040 |
| Snapchat | 0.001 | -0.064 | 0.000 | -0.051 | 0.000 | -0.058 | 0.000 | -0.097 |
| RickieFowler | 0.000 | -0.064 | 0.000 | -0.041 | 0.000 | -0.105 | 0.004 | -0.079 |
| MichaelVick | 0.000 | -0.064 | 0.000 | -0.041 | 0.000 | -0.038 | 0.000 | -0.004 |
| ConcernedApe | 0.000 | -0.064 | 0.000 | -0.008 | 0.000 | -0.012 | 0.001 | -0.031 |
| KatyTurNBC | 0.001 | -0.063 | 0.000 | 0.000 | 0.000 | -0.060 | 0.000 | -0.031 |
| netw3rk | 0.000 | -0.063 | 0.004 | -0.031 | 0.001 | -0.031 | 0.003 | -0.035 |
| BleacherReport | 0.000 | -0.063 | 0.007 | -0.062 | 0.000 | 0.022 | 0.000 | -0.034 |
| Wale | 0.000 | -0.063 | 0.001 | -0.022 | 0.000 | -0.001 | 0.006 | -0.011 |
| Kurkjian_ESPN | 0.000 | -0.062 | 0.000 | -0.098 | 0.000 | -0.047 | 0.000 | -0.041 |
| TravisPastrana | 0.000 | -0.062 | 0.020 | -0.072 | 0.000 | -0.039 | 0.000 | -0.045 |
| WildTurtle | 0.009 | -0.062 | 0.003 | -0.056 | 0.000 | -0.025 | 0.000 | -0.050 |
| Samsung | 0.003 | -0.062 | 0.008 | -0.049 | 0.000 | -0.068 | 0.000 | -0.060 |
| F1abraham | 0.000 | -0.062 | 0.000 | -0.046 | 0.000 | -0.061 | 0.002 | -0.026 |
| ShaneVictorino | 0.004 | -0.062 | 0.000 | -0.033 | 0.000 | -0.054 | 0.000 | -0.064 |
| SOLREPUBLIC | 0.000 | -0.062 | 0.000 | -0.051 | 0.000 | -0.032 | 0.000 | -0.069 |
| TheRealNimoy | 0.000 | -0.062 | 0.000 | -0.028 | 0.001 | -0.054 | 0.000 | -0.010 |
| oregonfootball | 0.009 | -0.062 | 0.001 | -0.039 | 0.000 | -0.040 | 0.000 | 0.003 |
| mikethemiz | 0.000 | -0.061 | 0.000 | -0.049 | 0.000 | -0.052 | 0.000 | -0.053 |
| jimmycarr | 0.000 | -0.061 | 0.000 | -0.049 | 0.000 | 0.035 | 0.002 | -0.040 |
| htc | 0.006 | -0.061 | 0.000 | -0.020 | 0.000 | -0.045 | 0.002 | -0.004 |
| ochocinco | 0.000 | -0.061 | 0.000 | -0.028 | 0.000 | -0.027 | 0.003 | -0.011 |
| VernonDavis85 | 0.000 | -0.061 | 0.000 | -0.086 | 0.000 | -0.057 | 0.000 | -0.053 |
| PatrickWillis52 | 0.000 | -0.061 | 0.000 | -0.083 | 0.000 | -0.073 | 0.000 | -0.063 |
| SMITEGame | 0.000 | -0.061 | 0.001 | -0.077 | 0.000 | -0.065 | 0.000 | -0.120 |
| berleezy | 0.000 | -0.061 | 0.000 | -0.072 | 0.000 | -0.081 | 0.000 | -0.053 |
| nickjfrost | 0.000 | -0.061 | 0.000 | -0.055 | 0.000 | -0.018 | 0.000 | -0.027 |
| emrata | 0.009 | -0.061 | 0.000 | -0.052 | 0.000 | -0.033 | 0.000 | 0.015 |
| sheetz | 0.004 | -0.061 | 0.002 | -0.035 | 0.000 | -0.049 | 0.000 | -0.022 |
| JohnDingell | 0.000 | -0.061 | 0.000 | -0.032 | 0.000 | -0.065 | 0.000 | -0.047 |
| Amazon3PSellers | 0.000 | -0.061 | 0.007 | -0.026 | 0.000 | -0.041 | 0.000 | -0.047 |
| onedirection | 0.000 | -0.061 | 0.000 | -0.001 | 0.000 | -0.049 | 0.000 | -0.016 |
| HeerJeet | 0.000 | -0.061 | 0.000 | 0.010 | 0.002 | -0.073 | 0.001 | -0.042 |
| jimmyeatworld | 0.000 | -0.061 | 0.000 | 0.019 | 0.000 | -0.018 | 0.000 | 0.004 |
| therealcliffyb | 0.000 | -0.061 | 0.000 | -0.005 | 0.000 | -0.041 | 0.000 | -0.041 |
| id_723613712783908865 | 0.000 | -0.061 | 0.000 | -0.069 | 0.000 | -0.011 | 0.000 | -0.030 |
| StarCraft | 0.000 | -0.061 | 0.000 | -0.006 | 0.001 | 0.062 | 0.000 | -0.043 |
| id_536649400 | 0.002 | -0.061 | 0.000 | -0.027 | 0.000 | 0.033 | 0.000 | 0.015 |
| KenJennings | 0.000 | -0.061 | 0.002 | -0.068 | 0.000 | -0.072 | 0.000 | -0.034 |
| RSherman_25 | 0.000 | -0.061 | 0.000 | -0.068 | 0.000 | -0.098 | 0.000 | -0.060 |
| AP | 0.001 | -0.060 | 0.001 | -0.012 | 0.000 | -0.034 | 0.000 | -0.014 |
| Limericking | 0.000 | -0.060 | 0.000 | -0.054 | 0.000 | -0.061 | 0.000 | -0.012 |
| JordanSpieth | 0.000 | -0.060 | 0.000 | -0.033 | 0.000 | -0.075 | 0.003 | -0.064 |
| XtotheV | 0.002 | -0.060 | 0.000 | -0.033 | 0.000 | 0.004 | 0.000 | -0.026 |
| lastfm | 0.000 | -0.060 | 0.000 | -0.018 | 0.000 | -0.068 | 0.000 | -0.017 |
| katienolan | 0.000 | -0.060 | 0.000 | -0.062 | 0.000 | -0.075 | 0.000 | -0.038 |
| richeisen | 0.000 | -0.059 | 0.000 | -0.076 | 0.000 | -0.044 | 0.007 | 0.024 |
| Microsoft | 0.004 | -0.059 | 0.004 | -0.089 | 0.000 | -0.071 | 0.003 | -0.059 |
| JoeBiden | 0.000 | -0.059 | 0.000 | -0.022 | 0.000 | -0.048 | 0.000 | -0.036 |
| TigerWoods | 0.000 | -0.059 | 0.000 | -0.038 | 0.000 | -0.100 | 0.004 | -0.029 |
| DangeRussWilson | 0.000 | -0.059 | 0.000 | -0.089 | 0.002 | -0.105 | 0.000 | -0.084 |
| AndrewMayne | 0.000 | -0.059 | 0.000 | -0.053 | 0.000 | -0.072 | 0.000 | -0.075 |
| day9tv | 0.000 | -0.059 | 0.000 | -0.046 | 0.000 | -0.012 | 0.000 | -0.035 |
| GSElevator | 0.000 | -0.059 | 0.000 | -0.041 | 0.000 | -0.078 | 0.001 | -0.035 |
| MaciBookout | 0.000 | -0.059 | 0.000 | -0.015 | 0.000 | -0.058 | 0.000 | 0.004 |
| ZacEfron | 0.000 | -0.059 | 0.000 | -0.043 | 0.000 | -0.100 | 0.000 | -0.017 |
| Jumpman23 | 0.000 | -0.059 | 0.003 | -0.039 | 0.000 | -0.020 | 0.000 | -0.020 |
| totalfratmove | 0.006 | -0.059 | 0.000 | 0.031 | 0.000 | 0.055 | 0.000 | 0.043 |
| IAmJericho | 0.005 | -0.059 | 0.000 | -0.048 | 0.000 | -0.042 | 0.000 | -0.038 |
| S_C_ | 0.000 | -0.059 | 0.000 | -0.046 | 0.000 | -0.064 | 0.000 | -0.016 |
| TeamLiquid | 0.000 | -0.059 | 0.000 | -0.046 | 0.000 | -0.042 | 0.000 | -0.075 |
| LinzDeFranco | 0.003 | -0.059 | 0.007 | -0.083 | 0.000 | -0.075 | 0.000 | -0.043 |
| chucktodd | 0.000 | -0.059 | 0.000 | -0.033 | 0.000 | -0.050 | 0.000 | -0.039 |
| ESPNNBA | 0.000 | -0.059 | 0.000 | -0.033 | 0.000 | -0.012 | 0.008 | -0.117 |
| maggieNYT | 0.000 | -0.059 | 0.004 | -0.022 | 0.001 | -0.081 | 0.001 | -0.043 |
| YahooForde | 0.000 | -0.058 | 0.000 | -0.077 | 0.000 | -0.081 | 0.000 | -0.027 |
| NeroUK | 0.000 | -0.058 | 0.000 | -0.052 | 0.000 | -0.065 | 0.000 | -0.063 |
| michaelpollan | 0.000 | -0.058 | 0.002 | -0.043 | 0.000 | -0.041 | 0.000 | -0.068 |
| XoticPC | 0.000 | -0.058 | 0.000 | -0.041 | 0.000 | -0.057 | 0.003 | -0.032 |
| iamjojo | 0.000 | -0.058 | 0.000 | -0.026 | 0.001 | -0.057 | 0.000 | -0.032 |
| 007 | 0.005 | -0.058 | 0.000 | -0.015 | 0.000 | -0.065 | 0.001 | -0.016 |
| Jeff_Piotrowski | 0.000 | -0.058 | 0.000 | -0.012 | 0.000 | -0.041 | 0.000 | -0.058 |
| MeganMullally | 0.000 | -0.058 | 0.000 | -0.001 | 0.000 | -0.002 | 0.000 | -0.011 |
| TheMandyMoore | 0.000 | -0.058 | 0.000 | 0.027 | 0.000 | -0.049 | 0.000 | -0.001 |
| dog_rates | 0.000 | -0.058 | 0.000 | -0.034 | 0.000 | -0.008 | 0.003 | -0.003 |
| wingoz | 0.000 | -0.057 | 0.000 | -0.088 | 0.000 | -0.102 | 0.000 | -0.031 |
| Buster_ESPN | 0.001 | -0.057 | 0.000 | -0.083 | 0.000 | -0.058 | 0.003 | -0.047 |
| CNN | 0.013 | -0.057 | 0.008 | 0.019 | 0.000 | 0.001 | 0.004 | -0.025 |
| humble | 0.003 | -0.057 | 0.003 | 0.006 | 0.000 | 0.033 | 0.001 | -0.056 |
| EASPORTS | 0.000 | -0.057 | 0.005 | -0.046 | 0.000 | -0.032 | 0.000 | 0.012 |
| Amy_Siskind | 0.000 | -0.057 | 0.000 | -0.028 | 0.000 | -0.083 | 0.000 | -0.055 |
| TheFunnyVine | 0.001 | -0.057 | 0.000 | -0.010 | 0.001 | -0.018 | 0.001 | -0.041 |
| BurgerKing | 0.003 | -0.057 | 0.000 | -0.064 | 0.000 | -0.070 | 0.000 | -0.056 |
| ZOWIEbyBenQUSA | 0.000 | -0.056 | 0.003 | -0.104 | 0.000 | -0.072 | 0.001 | -0.075 |
| hasanminhaj | 0.005 | -0.056 | 0.001 | -0.053 | 0.000 | -0.018 | 0.000 | -0.035 |
| LeBatardShow | 0.000 | -0.056 | 0.000 | -0.049 | 0.000 | -0.025 | 0.000 | -0.035 |
| AC360 | 0.000 | -0.056 | 0.000 | -0.039 | 0.000 | 0.002 | 0.000 | -0.066 |
| WWEDanielBryan | 0.000 | -0.056 | 0.000 | -0.032 | 0.000 | -0.025 | 0.000 | -0.035 |
| LKrauss1 | 0.006 | -0.056 | 0.002 | -0.017 | 0.000 | 0.008 | 0.000 | -0.026 |
| votevets | 0.000 | -0.056 | 0.000 | 0.005 | 0.000 | 0.006 | 0.000 | -0.002 |
| elliegoulding | 0.004 | -0.056 | 0.000 | -0.032 | 0.000 | -0.006 | 0.000 | -0.002 |
| PreetBharara | 0.000 | -0.056 | 0.001 | -0.007 | 0.000 | -0.028 | 0.000 | 0.000 |
| carmeloanthony | 0.000 | -0.055 | 0.000 | -0.001 | 0.000 | -0.046 | 0.000 | -0.051 |
| SuperDuperKyle | 0.003 | -0.055 | 0.007 | -0.092 | 0.002 | -0.049 | 0.001 | 0.010 |
| zerohedge | 0.003 | -0.055 | 0.000 | -0.089 | 0.000 | -0.033 | 0.002 | -0.053 |
| kaitlancollins | 0.000 | -0.055 | 0.000 | -0.060 | 0.000 | -0.088 | 0.000 | -0.016 |
| PGATOUR | 0.000 | -0.055 | 0.001 | -0.049 | 0.001 | -0.073 | 0.000 | -0.068 |
| BrodyJenner | 0.000 | -0.055 | 0.000 | -0.046 | 0.000 | -0.010 | 0.000 | -0.032 |
| iheartraving | 0.000 | -0.055 | 0.001 | -0.018 | 0.000 | -0.049 | 0.000 | 0.015 |
| CarsonDaly | 0.000 | -0.055 | 0.000 | 0.008 | 0.000 | -0.026 | 0.000 | 0.020 |
| StephenMerchant | 0.000 | -0.055 | 0.000 | 0.027 | 0.000 | 0.045 | 0.001 | 0.010 |
| mastodonmusic | 0.001 | -0.055 | 0.000 | 0.030 | 0.000 | 0.006 | 0.004 | 0.056 |
| jaketapper | 0.000 | -0.055 | 0.000 | -0.025 | 0.000 | -0.059 | 0.000 | -0.001 |
| CallofDuty | 0.001 | -0.055 | 0.000 | -0.060 | 0.000 | -0.063 | 0.000 | -0.052 |
| TSM | 0.000 | -0.055 | 0.008 | -0.052 | 0.001 | -0.009 | 0.010 | -0.101 |
| kelly_clarkson | 0.000 | -0.055 | 0.001 | 0.002 | 0.000 | -0.009 | 0.005 | 0.012 |
| TEDTalks | 0.000 | -0.055 | 0.000 | -0.020 | 0.000 | 0.050 | 0.000 | -0.028 |
| XboxLiveRewards | 0.000 | -0.054 | 0.000 | -0.043 | 0.000 | -0.061 | 0.005 | -0.007 |
| BrandonSteiner | 0.000 | -0.054 | 0.000 | -0.038 | 0.000 | -0.039 | 0.000 | -0.003 |
| ussoccer_wnt | 0.002 | -0.054 | 0.000 | -0.028 | 0.000 | 0.004 | 0.004 | -0.022 |
| LifeCheating | 0.000 | -0.054 | 0.003 | -0.023 | 0.000 | -0.061 | 0.000 | -0.050 |
| karminmusic | 0.000 | -0.054 | 0.000 | 0.001 | 0.000 | -0.047 | 0.000 | 0.026 |
| Usher | 0.000 | -0.054 | 0.013 | -0.026 | 0.000 | -0.025 | 0.000 | -0.022 |
| petewentz | 0.000 | -0.054 | 0.000 | -0.011 | 0.001 | -0.031 | 0.000 | -0.031 |
| GFuelEnergy | 0.000 | -0.054 | 0.000 | -0.043 | 0.000 | -0.091 | 0.000 | -0.050 |
| jeremypiven | 0.000 | -0.054 | 0.001 | -0.029 | 0.000 | -0.020 | 0.000 | 0.010 |
| id_887010284166144001 | 0.000 | -0.053 | 0.001 | -0.054 | 0.001 | -0.025 | 0.000 | -0.048 |
| kobebryant | 0.001 | -0.053 | 0.008 | -0.058 | 0.000 | -0.058 | 0.001 | -0.054 |
| SouthwestAir | 0.000 | -0.052 | 0.000 | -0.032 | 0.000 | -0.059 | 0.000 | -0.027 |
| BMarshall | 0.001 | -0.052 | 0.000 | -0.075 | 0.001 | -0.112 | 0.000 | -0.032 |
| hunterpence | 0.000 | -0.052 | 0.000 | -0.066 | 0.000 | -0.057 | 0.000 | -0.027 |
| CHIMPSINSOCKS | 0.003 | -0.052 | 0.000 | -0.052 | 0.000 | -0.002 | 0.000 | -0.032 |
| iamdevloper | 0.000 | -0.052 | 0.000 | -0.043 | 0.000 | -0.073 | 0.000 | -0.001 |
| SteinerInsider | 0.000 | -0.052 | 0.000 | -0.041 | 0.000 | -0.041 | 0.000 | 0.004 |
| MLS | 0.000 | -0.052 | 0.002 | -0.035 | 0.000 | -0.026 | 0.000 | -0.022 |
| alyandaj | 0.000 | -0.052 | 0.000 | -0.032 | 0.000 | 0.022 | 0.000 | -0.027 |
| brooklynvegan | 0.000 | -0.052 | 0.000 | -0.021 | 0.000 | -0.041 | 0.000 | -0.027 |
| testament | 0.000 | -0.052 | 0.000 | -0.021 | 0.000 | -0.002 | 0.000 | -0.006 |
| JeopardySports | 0.000 | -0.052 | 0.012 | -0.018 | 0.002 | 0.014 | 0.003 | -0.022 |
| nickjonas | 0.000 | -0.052 | 0.000 | -0.007 | 0.000 | -0.041 | 0.000 | -0.006 |
| TDCinemaClub | 0.001 | -0.052 | 0.000 | -0.007 | 0.000 | 0.014 | 0.000 | -0.016 |
| ClintonFdn | 0.000 | -0.052 | 0.000 | 0.005 | 0.000 | 0.006 | 0.000 | 0.010 |
| jcomparel | 0.001 | -0.052 | 0.000 | 0.005 | 0.000 | -0.018 | 0.000 | -0.089 |
| gibsonguitar | 0.000 | -0.052 | 0.001 | 0.010 | 0.000 | 0.037 | 0.000 | 0.025 |
| 90sgirlproblem | 0.002 | -0.052 | 0.000 | 0.027 | 0.000 | -0.018 | 0.000 | 0.015 |
| foofighters | 0.000 | -0.052 | 0.000 | 0.012 | 0.000 | 0.016 | 0.000 | 0.067 |
| algore | 0.000 | -0.052 | 0.007 | 0.019 | 0.000 | 0.016 | 0.000 | 0.016 |
| AroundTheNFL | 0.000 | -0.052 | 0.014 | -0.093 | 0.000 | -0.047 | 0.000 | -0.007 |
| bubbawatson | 0.000 | -0.052 | 0.000 | -0.072 | 0.001 | -0.118 | 0.000 | -0.064 |
| ReneeYoungWWE | 0.008 | -0.052 | 0.000 | -0.046 | 0.000 | -0.061 | 0.002 | -0.064 |
| ZackRyder | 0.000 | -0.052 | 0.002 | -0.038 | 0.001 | -0.047 | 0.005 | -0.060 |
| FormaL | 0.000 | -0.052 | 0.001 | -0.028 | 0.000 | -0.083 | 0.000 | -0.041 |
| OpTic_Crimsix | 0.004 | -0.052 | 0.000 | -0.028 | 0.000 | -0.083 | 0.000 | -0.041 |
| EverythingGoats | 0.000 | -0.052 | 0.000 | 0.003 | 0.000 | 0.004 | 0.000 | -0.026 |
| davidortiz | 0.000 | -0.052 | 0.001 | 0.008 | 0.000 | 0.018 | 0.000 | -0.031 |
| OhNoSheTwitnt | 0.000 | -0.052 | 0.000 | 0.024 | 0.000 | -0.025 | 0.000 | -0.017 |
| WhatTheFFacts | 0.000 | -0.052 | 0.000 | 0.008 | 0.000 | -0.010 | 0.000 | 0.050 |
| zeldawilliams | 0.000 | -0.052 | 0.000 | -0.025 | 0.001 | -0.038 | 0.000 | -0.009 |
| DaneCook | 0.000 | -0.052 | 0.000 | -0.013 | 0.000 | 0.028 | 0.000 | 0.018 |
| RapSheet | 0.015 | -0.052 | 0.000 | -0.079 | 0.000 | -0.067 | 0.000 | -0.015 |
| cnnbrk | 0.004 | -0.052 | 0.013 | -0.025 | 0.000 | 0.030 | 0.000 | -0.040 |
| simonpegg | 0.000 | -0.051 | 0.001 | -0.014 | 0.001 | 0.013 | 0.000 | 0.006 |
| prozdkp | 0.000 | -0.051 | 0.000 | -0.056 | 0.000 | -0.026 | 0.000 | -0.047 |
| CP3 | 0.004 | -0.051 | 0.008 | -0.042 | 0.000 | -0.078 | 0.006 | -0.028 |
| funnyordie | 0.005 | -0.051 | 0.002 | -0.060 | 0.000 | 0.000 | 0.004 | -0.029 |
| RedditCFB | 0.006 | -0.051 | 0.000 | -0.068 | 0.000 | -0.041 | 0.000 | -0.006 |
| vincestaples | 0.000 | -0.051 | 0.012 | -0.058 | 0.000 | -0.026 | 0.000 | -0.007 |
| threadless | 0.000 | -0.050 | 0.001 | -0.054 | 0.000 | -0.070 | 0.000 | -0.031 |
| WWE | 0.002 | -0.050 | 0.003 | -0.042 | 0.000 | -0.047 | 0.000 | -0.038 |
| Imaginedragons | 0.000 | -0.050 | 0.000 | -0.021 | 0.000 | -0.020 | 0.011 | 0.043 |
| CauseWereGuys | 0.000 | -0.050 | 0.000 | -0.032 | 0.000 | -0.001 | 0.000 | -0.027 |
| deadmau5 | 0.000 | -0.050 | 0.000 | -0.044 | 0.000 | -0.007 | 0.000 | -0.009 |
| Nationals | 0.000 | -0.050 | 0.000 | -0.094 | 0.000 | -0.033 | 0.000 | -0.094 |
| AlbertBreer | 0.000 | -0.050 | 0.000 | -0.077 | 0.000 | -0.033 | 0.000 | 0.020 |
| YahooSportsNBA | 0.005 | -0.050 | 0.002 | -0.072 | 0.000 | -0.096 | 0.000 | -0.094 |
| NOAA | 0.000 | -0.050 | 0.000 | -0.058 | 0.000 | -0.041 | 0.000 | -0.032 |
| steveaoki | 0.000 | -0.050 | 0.000 | -0.043 | 0.000 | -0.073 | 0.000 | -0.042 |
| HANDLE_TEMP | 0.000 | -0.050 | 0.004 | -0.038 | 0.000 | -0.073 | 0.000 | -0.027 |
| SecretService | 0.000 | -0.050 | 0.001 | -0.038 | 0.000 | -0.057 | 0.000 | -0.063 |
| kickstarter | 0.000 | -0.050 | 0.000 | -0.035 | 0.000 | -0.065 | 0.000 | -0.022 |
| si_vault | 0.000 | -0.050 | 0.000 | -0.029 | 0.000 | -0.049 | 0.000 | -0.032 |
| IHOP | 0.000 | -0.050 | 0.000 | -0.026 | 0.000 | -0.049 | 0.000 | -0.032 |
| HoodieAllen | 0.000 | -0.050 | 0.000 | -0.024 | 0.000 | -0.073 | 0.000 | -0.084 |
| ChuckTingle | 0.000 | -0.050 | 0.000 | 0.008 | 0.000 | -0.033 | 0.000 | -0.016 |
| drewbrees | 0.000 | -0.050 | 0.000 | -0.092 | 0.002 | -0.087 | 0.000 | -0.026 |
| itshafu | 0.000 | -0.050 | 0.000 | -0.035 | 0.000 | 0.025 | 0.000 | -0.026 |
| OpTic_BigTymeR | 0.001 | -0.050 | 0.000 | -0.026 | 0.000 | -0.075 | 0.000 | -0.064 |
| LOLGOP | 0.012 | -0.050 | 0.000 | -0.024 | 0.000 | -0.062 | 0.000 | -0.068 |
| DILLONFRANCIS | 0.000 | -0.050 | 0.000 | -0.011 | 0.000 | -0.025 | 0.000 | 0.023 |
| RayRice27 | 0.007 | -0.049 | 0.006 | -0.082 | 0.000 | -0.085 | 0.000 | -0.053 |
| IronsidePC | 0.000 | -0.049 | 0.000 | -0.075 | 0.001 | -0.098 | 0.000 | -0.075 |
| Logitech | 0.000 | -0.049 | 0.005 | -0.051 | 0.000 | -0.085 | 0.000 | -0.062 |
| knifepartyinc | 0.000 | -0.049 | 0.000 | -0.025 | 0.000 | -0.018 | 0.000 | -0.031 |
| CNNPolitics | 0.000 | -0.049 | 0.000 | -0.022 | 0.000 | 0.028 | 0.000 | -0.048 |
| chriscolfer | 0.000 | -0.049 | 0.000 | -0.008 | 0.000 | -0.038 | 0.000 | -0.026 |
| INTOTHEAM | 0.000 | -0.049 | 0.000 | -0.005 | 0.000 | -0.025 | 0.000 | 0.000 |
| Springfield_Inc | 0.003 | -0.049 | 0.000 | 0.023 | 0.000 | -0.025 | 0.000 | 0.018 |
| OBSProject | 0.000 | -0.049 | 0.005 | -0.046 | 0.000 | -0.068 | 0.000 | -0.079 |
| DesignByHumans | 0.003 | -0.049 | 0.000 | -0.031 | 0.000 | -0.075 | 0.000 | -0.036 |
| KapSlap | 0.000 | -0.049 | 0.000 | -0.025 | 0.001 | -0.032 | 0.000 | -0.045 |
| Freakonomics | 0.002 | -0.049 | 0.000 | -0.007 | 0.000 | -0.047 | 0.001 | -0.036 |
| Know | 0.000 | -0.049 | 0.003 | -0.002 | 0.001 | -0.032 | 0.000 | -0.017 |
| TheLewisBlack | 0.000 | -0.049 | 0.000 | 0.024 | 0.000 | 0.018 | 0.000 | 0.007 |
| GATDAILY | 0.000 | -0.049 | 0.000 | 0.026 | 0.000 | 0.018 | 0.000 | -0.007 |
| JoelEmbiid | 0.004 | -0.049 | 0.000 | -0.039 | 0.000 | -0.023 | 0.000 | -0.069 |
| AMCTalkingDead | 0.003 | -0.049 | 0.000 | -0.050 | 0.002 | -0.041 | 0.003 | -0.024 |
| KevinHart4real | 0.001 | -0.049 | 0.009 | -0.067 | 0.000 | -0.038 | 0.000 | -0.033 |
| TheTweetOfGod | 0.005 | -0.049 | 0.000 | -0.008 | 0.001 | -0.015 | 0.000 | -0.021 |
| HyperX | 0.003 | -0.049 | 0.000 | -0.092 | 0.000 | -0.069 | 0.002 | -0.040 |
| wojespn | 0.000 | -0.049 | 0.012 | -0.023 | 0.000 | -0.030 | 0.000 | -0.073 |
| ScottDisick | 0.000 | -0.048 | 0.002 | -0.017 | 0.000 | -0.014 | 0.000 | -0.031 |
| TheOnion | 0.006 | -0.048 | 0.000 | -0.034 | 0.000 | -0.016 | 0.003 | -0.027 |
| mcuban | 0.000 | -0.048 | 0.006 | -0.030 | 0.001 | -0.041 | 0.000 | -0.021 |
| jason_mraz | 0.000 | -0.048 | 0.000 | -0.013 | 0.000 | -0.025 | 0.001 | 0.004 |
| Quaker | 0.003 | -0.048 | 0.000 | -0.005 | 0.000 | -0.013 | 0.000 | -0.011 |
| washingtonpost | 0.000 | -0.047 | 0.000 | -0.053 | 0.002 | -0.028 | 0.000 | -0.039 |
| ProductHunt | 0.001 | -0.047 | 0.003 | -0.042 | 0.000 | -0.050 | 0.000 | -0.026 |
| TwitterGaming | 0.003 | -0.047 | 0.000 | -0.064 | 0.000 | -0.057 | 0.007 | -0.048 |
| AndroidPolice | 0.000 | -0.047 | 0.000 | -0.021 | 0.000 | -0.036 | 0.000 | 0.047 |
| NRGgg | 0.000 | -0.047 | 0.000 | -0.039 | 0.000 | -0.038 | 0.000 | -0.031 |
| tiny_star_field | 0.008 | -0.047 | 0.000 | -0.086 | 0.000 | -0.049 | 0.000 | -0.073 |
| acorns | 0.001 | -0.047 | 0.000 | -0.075 | 0.001 | 0.022 | 0.000 | -0.136 |
| nyjets | 0.000 | -0.047 | 0.000 | -0.066 | 0.000 | -0.033 | 0.002 | -0.068 |
| LimitedRunGames | 0.000 | -0.047 | 0.003 | -0.046 | 0.000 | -0.057 | 0.000 | -0.027 |
| ESPN_Esports | 0.000 | -0.047 | 0.000 | -0.046 | 0.000 | -0.041 | 0.000 | -0.058 |
| AmericanAir | 0.000 | -0.047 | 0.001 | -0.043 | 0.000 | -0.033 | 0.000 | -0.047 |
| MsBlaireWhite | 0.000 | -0.047 | 0.000 | -0.032 | 0.000 | -0.049 | 0.000 | -0.079 |
| chordoverstreet | 0.000 | -0.047 | 0.000 | -0.026 | 0.000 | -0.049 | 0.000 | -0.037 |
| HarryShumJr | 0.000 | -0.047 | 0.000 | -0.026 | 0.000 | -0.049 | 0.005 | -0.037 |
| CarmenYulinCruz | 0.000 | -0.047 | 0.000 | -0.024 | 0.000 | -0.088 | 0.000 | 0.004 |
| SeattlesBest | 0.000 | -0.047 | 0.000 | -0.012 | 0.000 | -0.002 | 0.000 | -0.016 |
| SoVeryBritish | 0.000 | -0.047 | 0.000 | -0.009 | 0.000 | 0.014 | 0.000 | -0.022 |
| Burberry | 0.004 | -0.047 | 0.000 | -0.007 | 0.000 | -0.033 | 0.000 | -0.011 |
| id_825043982006759428 | 0.000 | -0.047 | 0.000 | -0.004 | 0.000 | -0.026 | 0.000 | -0.022 |
| peterfacinelli | 0.000 | -0.047 | 0.000 | 0.010 | 0.000 | 0.022 | 0.000 | -0.001 |
| KISSOnline | 0.000 | -0.047 | 0.000 | 0.025 | 0.000 | 0.029 | 0.001 | 0.020 |
| theskimm | 0.000 | -0.047 | 0.000 | 0.025 | 0.000 | 0.037 | 0.000 | 0.041 |
| Comey | 0.000 | -0.047 | 0.000 | 0.006 | 0.000 | -0.024 | 0.000 | 0.000 |
| evansilva | 0.000 | -0.047 | 0.008 | -0.080 | 0.000 | -0.090 | 0.000 | -0.017 |
| SennheiserGamer | 0.003 | -0.047 | 0.000 | -0.041 | 0.000 | -0.083 | 0.002 | 0.002 |
| BillPlaschke | 0.000 | -0.047 | 0.003 | -0.041 | 0.000 | -0.004 | 0.000 | -0.017 |
| OldNavy | 0.000 | -0.047 | 0.001 | -0.036 | 0.000 | -0.054 | 0.000 | -0.036 |
| AMDFX | 0.000 | -0.047 | 0.000 | -0.033 | 0.000 | -0.068 | 0.000 | 0.035 |
| passionpit | 0.007 | -0.047 | 0.009 | -0.033 | 0.000 | -0.054 | 0.000 | -0.003 |
| ScufGaming | 0.000 | -0.046 | 0.007 | -0.056 | 0.000 | -0.075 | 0.000 | -0.056 |
| iamsambee | 0.001 | -0.046 | 0.002 | -0.023 | 0.000 | 0.008 | 0.000 | -0.020 |
| Blizzard_Ent | 0.000 | -0.046 | 0.003 | -0.009 | 0.000 | -0.021 | 0.000 | -0.022 |
| stephenfry | 0.005 | -0.046 | 0.000 | 0.041 | 0.000 | 0.052 | 0.000 | 0.004 |
| BillSimmons | 0.000 | -0.046 | 0.000 | -0.016 | 0.000 | -0.058 | 0.000 | -0.052 |
| ASUS | 0.004 | -0.046 | 0.000 | -0.073 | 0.000 | -0.072 | 0.000 | -0.011 |
| adidasoriginals | 0.000 | -0.046 | 0.000 | -0.030 | 0.000 | -0.049 | 0.008 | -0.031 |
| BronxZoosCobra | 0.001 | -0.046 | 0.000 | 0.000 | 0.000 | -0.013 | 0.000 | -0.031 |
| ASTROGaming | 0.002 | -0.046 | 0.007 | -0.055 | 0.001 | -0.091 | 0.000 | -0.083 |
| KontrolFreek | 0.000 | -0.045 | 0.000 | -0.069 | 0.000 | -0.057 | 0.000 | -0.062 |
| CuteEmergency | 0.001 | -0.045 | 0.000 | -0.028 | 0.000 | -0.036 | 0.002 | -0.047 |
| BMcCarthy32 | 0.006 | -0.045 | 0.000 | -0.087 | 0.000 | -0.056 | 0.000 | -0.076 |
| UniWatch | 0.000 | -0.045 | 0.000 | -0.049 | 0.000 | -0.062 | 0.000 | -0.006 |
| davidhogg111 | 0.000 | -0.045 | 0.001 | -0.017 | 0.000 | -0.050 | 0.000 | -0.031 |
| NBA | 0.000 | -0.045 | 0.003 | -0.031 | 0.000 | -0.006 | 0.000 | -0.059 |
| DeSeanJackson11 | 0.000 | -0.044 | 0.000 | -0.063 | 0.000 | -0.072 | 0.002 | -0.022 |
| SquareEnixUSA | 0.000 | -0.044 | 0.000 | -0.046 | 0.000 | -0.078 | 0.000 | -0.022 |
| CODWorldLeague | 0.002 | -0.044 | 0.010 | -0.046 | 0.000 | -0.045 | 0.000 | -0.062 |
| ringer | 0.000 | -0.044 | 0.000 | -0.034 | 0.000 | -0.038 | 0.000 | -0.035 |
| porterrobinson | 0.007 | -0.044 | 0.000 | 0.004 | 0.000 | 0.035 | 0.006 | -0.004 |
| PFF | 0.005 | -0.044 | 0.000 | -0.066 | 0.000 | -0.031 | 0.000 | 0.006 |
| rgay | 0.007 | -0.044 | 0.000 | 0.035 | 0.000 | -0.008 | 0.006 | -0.008 |
| Chris_Broussard | 0.002 | -0.044 | 0.000 | -0.036 | 0.000 | 0.005 | 0.002 | -0.038 |
| MichelleDBeadle | 0.004 | -0.044 | 0.000 | -0.021 | 0.000 | -0.041 | 0.002 | -0.017 |
| Polygon | 0.001 | -0.044 | 0.013 | 0.014 | 0.000 | 0.036 | 0.000 | -0.048 |
| Trevornoah | 0.000 | -0.044 | 0.004 | -0.025 | 0.000 | -0.019 | 0.000 | -0.013 |
| VitalikButerin | 0.000 | -0.044 | 0.001 | -0.059 | 0.000 | -0.032 | 0.000 | -0.026 |
| jonnysun | 0.001 | -0.044 | 0.008 | -0.043 | 0.000 | -0.061 | 0.000 | -0.069 |
| maxjoseph | 0.000 | -0.044 | 0.001 | -0.036 | 0.000 | -0.039 | 0.000 | -0.031 |
| ezraklein | 0.002 | -0.044 | 0.000 | -0.033 | 0.000 | -0.075 | 0.000 | -0.045 |
| CoryMonteith | 0.000 | -0.044 | 0.001 | -0.031 | 0.000 | -0.068 | 0.000 | -0.055 |
| _Snape_ | 0.000 | -0.044 | 0.000 | -0.031 | 0.000 | -0.018 | 0.000 | -0.022 |
| BittrexExchange | 0.000 | -0.044 | 0.002 | -0.028 | 0.000 | -0.025 | 0.000 | -0.050 |
| riseagainst | 0.000 | -0.044 | 0.004 | -0.028 | 0.000 | -0.004 | 0.000 | -0.026 |
| Mastercard | 0.000 | -0.044 | 0.000 | -0.012 | 0.000 | -0.047 | 0.000 | -0.045 |
| qwertee | 0.000 | -0.044 | 0.002 | 0.003 | 0.000 | 0.018 | 0.000 | -0.007 |
| EstelleDarlings | 0.000 | -0.044 | 0.000 | 0.003 | 0.000 | 0.025 | 0.000 | -0.012 |
| DwyaneWade | 0.000 | -0.044 | 0.000 | -0.017 | 0.000 | -0.031 | 0.000 | -0.010 |
| Redskins | 0.008 | -0.044 | 0.000 | -0.075 | 0.000 | 0.006 | 0.001 | -0.058 |
| comcastcares | 0.004 | -0.044 | 0.000 | -0.060 | 0.000 | -0.073 | 0.000 | -0.094 |
| smartfootball | 0.001 | -0.044 | 0.000 | -0.052 | 0.000 | -0.033 | 0.000 | 0.015 |
| Amaz | 0.000 | -0.044 | 0.000 | -0.035 | 0.000 | -0.057 | 0.000 | -0.001 |
| lolGosu | 0.000 | -0.044 | 0.000 | -0.035 | 0.000 | -0.002 | 0.000 | -0.022 |
| phil_hellmuth | 0.000 | -0.044 | 0.000 | -0.032 | 0.000 | -0.033 | 0.000 | 0.015 |
| RealKidPoker | 0.012 | -0.044 | 0.000 | -0.032 | 0.000 | -0.033 | 0.000 | 0.015 |
| Everytown | 0.003 | -0.044 | 0.004 | -0.029 | 0.000 | -0.057 | 0.000 | -0.042 |
| GAMDIAS | 0.000 | -0.044 | 0.000 | -0.015 | 0.000 | -0.041 | 0.000 | 0.015 |
| NuclearTakes | 0.000 | -0.044 | 0.000 | 0.013 | 0.000 | -0.033 | 0.000 | -0.047 |
| cher | 0.002 | -0.044 | 0.000 | 0.050 | 0.000 | 0.009 | 0.000 | 0.008 |
| OnionSports | 0.000 | -0.044 | 0.000 | -0.068 | 0.000 | -0.037 | 0.000 | -0.027 |
| idriselba | 0.001 | -0.044 | 0.000 | -0.003 | 0.001 | -0.019 | 0.000 | -0.027 |
| DestinyTheGame | 0.000 | -0.044 | 0.003 | -0.044 | 0.000 | -0.100 | 0.000 | -0.034 |
| CORSAIR | 0.000 | -0.043 | 0.000 | -0.064 | 0.000 | -0.072 | 0.000 | -0.028 |
| JasonKander | 0.000 | -0.043 | 0.000 | -0.002 | 0.000 | -0.044 | 0.000 | 0.015 |
| realsoundguys | 0.000 | -0.043 | 0.000 | 0.016 | 0.000 | -0.037 | 0.000 | 0.011 |
| PolitiFact | 0.000 | -0.043 | 0.003 | -0.035 | 0.002 | -0.065 | 0.000 | -0.041 |
| johncusack | 0.000 | -0.042 | 0.000 | 0.031 | 0.000 | 0.025 | 0.000 | 0.021 |
| NBCNews | 0.009 | -0.042 | 0.004 | -0.043 | 0.000 | -0.045 | 0.000 | -0.062 |
| redlobster | 0.000 | -0.042 | 0.000 | -0.029 | 0.000 | -0.058 | 0.000 | -0.040 |
| GuyFieri | 0.000 | -0.042 | 0.000 | -0.029 | 0.000 | -0.005 | 0.000 | -0.026 |
| XXL | 0.000 | -0.042 | 0.000 | -0.022 | 0.000 | -0.012 | 0.000 | 0.018 |
| ariannahuff | 0.000 | -0.041 | 0.000 | -0.064 | 0.001 | -0.083 | 0.000 | -0.045 |
| Braves | 0.000 | -0.041 | 0.002 | -0.056 | 0.000 | -0.018 | 0.000 | -0.017 |
| Paula_Deen | 0.000 | -0.041 | 0.000 | -0.038 | 0.000 | -0.068 | 0.000 | -0.031 |
| dubstep4dads | 0.000 | -0.041 | 0.011 | -0.023 | 0.000 | -0.054 | 0.000 | -0.031 |
| MensHealthMag | 0.002 | -0.041 | 0.000 | -0.012 | 0.000 | -0.025 | 0.000 | 0.016 |
| sciam | 0.000 | -0.041 | 0.000 | -0.005 | 0.000 | -0.068 | 0.002 | 0.007 |
| berniethoughts | 0.010 | -0.041 | 0.001 | 0.003 | 0.000 | -0.061 | 0.000 | -0.022 |
| KSIOlajidebt | 0.000 | -0.041 | 0.000 | 0.003 | 0.000 | 0.011 | 0.000 | -0.007 |
| Radeon | 0.000 | -0.041 | 0.002 | -0.060 | 0.000 | -0.079 | 0.000 | -0.027 |
| Nadeshot | 0.000 | -0.041 | 0.001 | -0.010 | 0.000 | -0.020 | 0.000 | -0.055 |
| MountainDew | 0.000 | -0.041 | 0.005 | 0.004 | 0.000 | -0.057 | 0.002 | -0.027 |
| ProPublica | 0.000 | -0.041 | 0.000 | 0.015 | 0.000 | -0.009 | 0.000 | -0.006 |
| theweeknd | 0.000 | -0.041 | 0.000 | -0.034 | 0.000 | -0.036 | 0.000 | -0.046 |
| pitchfork | 0.000 | -0.041 | 0.000 | 0.005 | 0.000 | 0.012 | 0.000 | -0.012 |
| kourtneykardash | 0.008 | -0.041 | 0.000 | 0.030 | 0.001 | -0.005 | 0.000 | 0.013 |
| JayGlazer | 0.018 | -0.041 | 0.010 | -0.066 | 0.000 | -0.074 | 0.000 | -0.006 |
| amazongames | 0.000 | -0.041 | 0.000 | -0.036 | 0.000 | -0.040 | 0.000 | -0.020 |
| dccommonsense | 0.004 | -0.041 | 0.000 | -0.060 | 0.000 | -0.057 | 0.000 | -0.001 |
| khanacademy | 0.000 | -0.041 | 0.016 | -0.055 | 0.000 | -0.073 | 0.000 | -0.063 |
| BFAds | 0.000 | -0.041 | 0.000 | -0.046 | 0.000 | -0.049 | 0.000 | -0.006 |
| ASAPferg | 0.001 | -0.041 | 0.000 | -0.043 | 0.000 | -0.010 | 0.000 | 0.004 |
| TheOfficial_CT | 0.000 | -0.041 | 0.000 | -0.029 | 0.000 | -0.033 | 0.000 | -0.027 |
| HistoryInPix | 0.000 | -0.041 | 0.005 | -0.015 | 0.000 | -0.018 | 0.000 | -0.001 |
| Yellowcard | 0.003 | -0.041 | 0.000 | -0.012 | 0.000 | -0.026 | 0.000 | -0.001 |
| BarbaraCorcoran | 0.000 | -0.041 | 0.000 | -0.009 | 0.000 | -0.026 | 0.000 | -0.027 |
| WoWInsider | 0.002 | -0.041 | 0.000 | -0.001 | 0.000 | -0.041 | 0.000 | -0.027 |
| cameron_kasky | 0.000 | -0.041 | 0.000 | -0.001 | 0.000 | -0.026 | 0.002 | -0.016 |
| jamesmccleese2 | 0.005 | -0.041 | 0.000 | -0.001 | 0.000 | -0.018 | 0.000 | -0.006 |
| FacesPics | 0.002 | -0.041 | 0.000 | 0.010 | 0.000 | 0.014 | 0.000 | 0.015 |
| RepresentPledge | 0.000 | -0.041 | 0.000 | 0.016 | 0.000 | 0.014 | 0.000 | -0.001 |
| tonyiommi | 0.000 | -0.041 | 0.000 | 0.025 | 0.000 | 0.014 | 0.005 | -0.006 |
| WholeFoods | 0.000 | -0.041 | 0.000 | 0.033 | 0.000 | -0.041 | 0.000 | 0.041 |
| SallyQYates | 0.000 | -0.041 | 0.002 | 0.023 | 0.000 | -0.013 | 0.000 | 0.017 |
| eddieizzard | 0.000 | -0.041 | 0.005 | -0.025 | 0.000 | -0.041 | 0.000 | -0.028 |
| MLG | 0.000 | -0.041 | 0.000 | -0.023 | 0.000 | -0.051 | 0.000 | -0.051 |
| Things4WhitePpl | 0.000 | -0.041 | 0.001 | -0.029 | 0.000 | -0.025 | 0.000 | -0.035 |
| PUSHA_T | 0.000 | -0.041 | 0.000 | -0.029 | 0.000 | -0.012 | 0.000 | 0.023 |
| Bitcoin | 0.000 | -0.041 | 0.003 | -0.017 | 0.000 | 0.019 | 0.000 | -0.010 |
| pandoramusic | 0.000 | -0.041 | 0.000 | 0.052 | 0.000 | -0.019 | 0.000 | 0.072 |
| Deadspin | 0.000 | -0.041 | 0.000 | -0.052 | 0.000 | -0.032 | 0.000 | -0.002 |
| ussoccer_mnt | 0.000 | -0.040 | 0.000 | -0.060 | 0.000 | -0.008 | 0.000 | -0.023 |
| NintendoAmerica | 0.000 | -0.040 | 0.000 | -0.050 | 0.000 | -0.003 | 0.003 | -0.047 |
| rustyrockets | 0.000 | -0.040 | 0.003 | 0.003 | 0.000 | 0.055 | 0.001 | 0.028 |
| JoeNBC | 0.000 | -0.040 | 0.000 | -0.061 | 0.000 | -0.065 | 0.000 | -0.070 |
| RedSox | 0.000 | -0.040 | 0.002 | -0.020 | 0.000 | -0.038 | 0.000 | -0.070 |
| lenadunham | 0.000 | -0.040 | 0.000 | 0.011 | 0.000 | 0.002 | 0.000 | -0.018 |
| piersmorgan | 0.000 | -0.040 | 0.014 | -0.023 | 0.000 | -0.063 | 0.000 | -0.048 |
| KrangTNelson | 0.005 | -0.039 | 0.000 | -0.058 | 0.000 | -0.096 | 0.000 | -0.023 |
| timthetatman | 0.000 | -0.039 | 0.000 | -0.034 | 0.000 | -0.060 | 0.000 | -0.066 |
| drose | 0.000 | -0.039 | 0.000 | -0.009 | 0.000 | -0.001 | 0.000 | -0.011 |
| Zedd | 0.000 | -0.039 | 0.000 | -0.005 | 0.000 | -0.001 | 0.003 | 0.059 |
| jhutch1992 | 0.000 | -0.039 | 0.000 | 0.031 | 0.000 | -0.025 | 0.000 | -0.023 |
| PodSaveAmerica | 0.001 | -0.039 | 0.006 | -0.082 | 0.000 | -0.090 | 0.000 | -0.031 |
| NatbyNature | 0.002 | -0.039 | 0.000 | -0.059 | 0.001 | -0.075 | 0.000 | -0.079 |
| brithume | 0.010 | -0.039 | 0.000 | -0.049 | 0.000 | -0.061 | 0.000 | -0.055 |
| 2chainz | 0.000 | -0.039 | 0.003 | -0.046 | 0.000 | -0.047 | 0.005 | 0.040 |
| RyanGosling | 0.000 | -0.039 | 0.000 | -0.020 | 0.001 | -0.061 | 0.000 | -0.031 |
| SennheiserUSA | 0.000 | -0.039 | 0.000 | -0.020 | 0.000 | -0.011 | 0.000 | -0.050 |
| shaunwhite | 0.000 | -0.039 | 0.004 | -0.007 | 0.000 | -0.025 | 0.000 | -0.012 |
| AprilDRyan | 0.000 | -0.039 | 0.000 | 0.001 | 0.000 | -0.032 | 0.000 | 0.035 |
| akaWorf | 0.000 | -0.039 | 0.000 | 0.019 | 0.000 | 0.025 | 0.000 | 0.002 |
| Terminix | 0.000 | -0.039 | 0.000 | 0.052 | 0.000 | 0.004 | 0.000 | 0.035 |
| jaysonst | 0.000 | -0.039 | 0.000 | -0.047 | 0.000 | 0.000 | 0.000 | 0.023 |
| JohnMayer | 0.000 | -0.039 | 0.000 | -0.012 | 0.000 | -0.005 | 0.003 | -0.028 |
| Warcraft | 0.003 | -0.039 | 0.006 | 0.034 | 0.000 | 0.051 | 0.000 | -0.021 |
| CoolerMaster | 0.001 | -0.038 | 0.000 | -0.054 | 0.000 | -0.053 | 0.000 | 0.014 |
| OpTic_Scumper | 0.000 | -0.038 | 0.001 | -0.019 | 0.000 | -0.070 | 0.000 | -0.023 |
| SteveNash | 0.000 | -0.038 | 0.000 | -0.019 | 0.000 | -0.031 | 0.000 | -0.027 |
| enews | 0.000 | -0.038 | 0.000 | 0.015 | 0.000 | -0.020 | 0.000 | -0.012 |
| TomCruise | 0.000 | -0.038 | 0.000 | 0.033 | 0.000 | 0.042 | 0.000 | 0.028 |
| JerrySeinfeld | 0.008 | -0.038 | 0.008 | 0.039 | 0.000 | -0.006 | 0.000 | 0.040 |
| rcobb18 | 0.000 | -0.038 | 0.000 | -0.066 | 0.000 | -0.096 | 0.000 | -0.001 |
| BNightengale | 0.000 | -0.038 | 0.000 | -0.066 | 0.000 | -0.033 | 0.000 | -0.047 |
| JaredAllen69 | 0.000 | -0.038 | 0.002 | -0.055 | 0.001 | -0.026 | 0.001 | -0.011 |
| MiamiHEAT | 0.000 | -0.038 | 0.004 | -0.052 | 0.000 | -0.026 | 0.000 | -0.022 |
| Trick2g | 0.000 | -0.038 | 0.003 | -0.046 | 0.000 | -0.065 | 0.000 | -0.053 |
| AdrianneCurry | 0.000 | -0.038 | 0.000 | -0.029 | 0.000 | -0.041 | 0.001 | -0.016 |
| Darkness429 | 0.000 | -0.038 | 0.000 | -0.021 | 0.001 | -0.057 | 0.000 | 0.020 |
| CalvinKlein | 0.000 | -0.038 | 0.000 | -0.021 | 0.000 | -0.049 | 0.000 | 0.010 |
| NCIXdotCOM | 0.010 | -0.038 | 0.000 | -0.018 | 0.000 | 0.022 | 0.000 | 0.010 |
| hotelsdotcom | 0.002 | -0.038 | 0.000 | -0.015 | 0.000 | -0.057 | 0.000 | -0.022 |
| AAofficial | 0.000 | -0.038 | 0.000 | -0.015 | 0.000 | -0.010 | 0.000 | 0.067 |
| GolfDigest | 0.000 | -0.038 | 0.000 | -0.012 | 0.000 | -0.081 | 0.000 | -0.032 |
| Phandroid | 0.000 | -0.038 | 0.000 | 0.010 | 0.000 | 0.022 | 0.000 | -0.001 |
| RitaOra | 0.000 | -0.038 | 0.000 | 0.016 | 0.000 | 0.006 | 0.000 | -0.001 |
| iontv | 0.000 | -0.038 | 0.000 | 0.033 | 0.000 | 0.022 | 0.000 | 0.067 |
| GunWinner | 0.000 | -0.038 | 0.000 | 0.033 | 0.000 | 0.037 | 0.000 | 0.015 |
| OpTic_DKarma | 0.000 | -0.038 | 0.000 | -0.013 | 0.000 | -0.062 | 0.001 | -0.026 |
| BungieHelp | 0.000 | -0.038 | 0.000 | -0.004 | 0.000 | -0.044 | 0.000 | -0.035 |
| slpng_giants | 0.000 | -0.038 | 0.000 | 0.001 | 0.000 | 0.000 | 0.000 | 0.006 |
| chrislhayes | 0.002 | -0.038 | 0.003 | 0.021 | 0.001 | -0.072 | 0.000 | -0.002 |
| whoismrrobot | 0.000 | -0.038 | 0.000 | -0.043 | 0.000 | -0.025 | 0.000 | -0.055 |
| hopesolo | 0.000 | -0.037 | 0.000 | -0.015 | 0.000 | -0.025 | 0.001 | -0.026 |
| Loudwire | 0.000 | -0.037 | 0.000 | -0.013 | 0.000 | 0.015 | 0.000 | 0.066 |
| bflay | 0.000 | -0.037 | 0.006 | 0.052 | 0.000 | -0.032 | 0.003 | 0.040 |
| RayNarvaezJr | 0.000 | -0.037 | 0.000 | -0.068 | 0.000 | -0.013 | 0.000 | -0.031 |
| MicrosoftStore | 0.000 | -0.037 | 0.000 | 0.004 | 0.000 | -0.037 | 0.000 | 0.016 |
| ricky_martin | 0.000 | -0.037 | 0.004 | 0.029 | 0.000 | 0.046 | 0.000 | 0.051 |
| elizabethforma | 0.000 | -0.037 | 0.004 | 0.032 | 0.000 | 0.033 | 0.003 | 0.010 |
| AJEnglish | 0.000 | -0.036 | 0.000 | 0.029 | 0.000 | 0.003 | 0.000 | -0.012 |
| nealbrennan | 0.000 | -0.036 | 0.000 | -0.072 | 0.000 | -0.061 | 0.000 | -0.036 |
| ramonashelburne | 0.000 | -0.036 | 0.000 | -0.069 | 0.000 | -0.097 | 0.000 | -0.074 |
| Rachel__Nichols | 0.000 | -0.036 | 0.000 | -0.036 | 0.000 | 0.011 | 0.000 | -0.022 |
| BacheloretteABC | 0.000 | -0.036 | 0.000 | -0.025 | 0.000 | -0.039 | 0.000 | 0.035 |
| TopherSpiro | 0.000 | -0.036 | 0.000 | -0.012 | 0.000 | -0.061 | 0.000 | -0.017 |
| Excision | 0.000 | -0.036 | 0.001 | 0.001 | 0.000 | 0.004 | 0.000 | -0.003 |
| tmorello | 0.000 | -0.036 | 0.000 | 0.024 | 0.000 | -0.004 | 0.000 | 0.064 |
| nikestore | 0.001 | -0.036 | 0.000 | -0.009 | 0.000 | -0.017 | 0.000 | 0.019 |
| Delta | 0.000 | -0.036 | 0.000 | -0.029 | 0.000 | -0.044 | 0.000 | -0.039 |
| robkardashian | 0.000 | -0.036 | 0.000 | -0.022 | 0.000 | -0.037 | 0.003 | -0.006 |
| DougJones | 0.000 | -0.036 | 0.000 | 0.003 | 0.000 | -0.075 | 0.002 | -0.047 |
| ColinCowherd | 0.000 | -0.036 | 0.000 | 0.016 | 0.001 | 0.037 | 0.000 | 0.015 |
| McDonalds | 0.000 | -0.036 | 0.000 | 0.040 | 0.000 | -0.031 | 0.000 | 0.017 |
| desusnice | 0.000 | -0.036 | 0.004 | -0.095 | 0.000 | -0.015 | 0.000 | -0.038 |
| Grantland33 | 0.000 | -0.036 | 0.000 | -0.033 | 0.000 | -0.031 | 0.000 | -0.020 |
| LaurenCohan | 0.006 | -0.036 | 0.000 | -0.029 | 0.000 | -0.031 | 0.000 | 0.001 |
| JeffPassan | 0.000 | -0.035 | 0.000 | -0.058 | 0.000 | -0.010 | 0.000 | 0.004 |
| SashaBanksWWE | 0.000 | -0.035 | 0.000 | -0.055 | 0.000 | -0.065 | 0.000 | -0.099 |
| HEELZiggler | 0.000 | -0.035 | 0.000 | -0.055 | 0.000 | -0.065 | 0.000 | -0.099 |
| Noahsyndergaard | 0.000 | -0.035 | 0.000 | -0.052 | 0.000 | -0.041 | 0.000 | -0.016 |
| Y_Strahovski | 0.000 | -0.035 | 0.005 | -0.043 | 0.000 | -0.049 | 0.000 | 0.004 |
| IAmLindsayJones | 0.007 | -0.035 | 0.000 | -0.041 | 0.000 | -0.018 | 0.004 | -0.063 |
| FinnBalor | 0.000 | -0.035 | 0.000 | -0.038 | 0.000 | -0.057 | 0.003 | -0.079 |
| TweetsofOld | 0.000 | -0.035 | 0.005 | -0.038 | 0.000 | -0.041 | 0.000 | -0.079 |
| SIChrisMannix | 0.008 | -0.035 | 0.000 | -0.035 | 0.000 | -0.088 | 0.000 | -0.037 |
| OregonBaseball | 0.000 | -0.035 | 0.000 | -0.035 | 0.000 | -0.057 | 0.000 | -0.058 |
| Pendulum | 0.000 | -0.035 | 0.003 | -0.032 | 0.000 | -0.033 | 0.000 | -0.027 |
| latimes | 0.000 | -0.035 | 0.001 | -0.024 | 0.000 | -0.049 | 0.010 | -0.063 |
| mikeroweworks | 0.000 | -0.035 | 0.000 | -0.024 | 0.000 | -0.033 | 0.000 | -0.022 |
| AETV | 0.000 | -0.035 | 0.000 | -0.018 | 0.000 | -0.002 | 0.000 | -0.022 |
| Ticketmaster | 0.003 | -0.035 | 0.000 | 0.005 | 0.000 | -0.018 | 0.000 | -0.006 |
| MIWband | 0.002 | -0.035 | 0.000 | 0.013 | 0.000 | 0.029 | 0.000 | 0.030 |
| ontargetmagazin | 0.000 | -0.035 | 0.000 | 0.030 | 0.000 | 0.037 | 0.000 | 0.015 |
| MagicJohnson | 0.007 | -0.035 | 0.003 | -0.012 | 0.000 | -0.036 | 0.000 | -0.031 |
| Treyarch | 0.000 | -0.035 | 0.000 | -0.034 | 0.000 | -0.066 | 0.006 | -0.034 |
| JerryRice | 0.003 | -0.035 | 0.003 | -0.068 | 0.000 | -0.038 | 0.000 | -0.048 |
| GuildWars2 | 0.000 | -0.035 | 0.000 | -0.037 | 0.000 | -0.038 | 0.000 | -0.044 |
| GUNNAROptiks | 0.000 | -0.035 | 0.000 | -0.034 | 0.000 | -0.065 | 0.000 | -0.031 |
| EyeOfJackieChan | 0.000 | -0.035 | 0.000 | -0.034 | 0.000 | -0.052 | 0.000 | -0.075 |
| daveweigel | 0.000 | -0.035 | 0.000 | -0.032 | 0.000 | -0.065 | 0.000 | -0.013 |
| TheSharkDaymond | 0.000 | -0.035 | 0.000 | -0.025 | 0.000 | -0.025 | 0.000 | -0.035 |
| OpTicH3CZ | 0.000 | -0.035 | 0.000 | -0.022 | 0.000 | -0.085 | 0.000 | -0.018 |
| ProoFJC | 0.002 | -0.035 | 0.000 | -0.015 | 0.000 | -0.072 | 0.003 | -0.048 |
| twentyonepilots | 0.000 | -0.035 | 0.005 | -0.003 | 0.000 | 0.008 | 0.000 | 0.004 |
| UberFacts | 0.000 | -0.035 | 0.001 | 0.013 | 0.000 | 0.024 | 0.000 | 0.013 |
| GeoffLRamsey | 0.000 | -0.034 | 0.000 | -0.056 | 0.000 | -0.020 | 0.007 | -0.001 |
| ColIegeStudent | 0.000 | -0.034 | 0.000 | -0.023 | 0.000 | 0.007 | 0.000 | -0.019 |
| Disney | 0.000 | -0.034 | 0.000 | -0.013 | 0.000 | -0.026 | 0.000 | -0.066 |
| Lesdoggg | 0.000 | -0.034 | 0.000 | 0.038 | 0.000 | -0.002 | 0.000 | 0.016 |
| RollingStone | 0.002 | -0.034 | 0.002 | -0.004 | 0.000 | -0.022 | 0.000 | -0.003 |
| macklemore | 0.004 | -0.034 | 0.007 | 0.070 | 0.000 | 0.062 | 0.000 | 0.033 |
| ZOTAC | 0.000 | -0.034 | 0.000 | -0.035 | 0.000 | -0.025 | 0.000 | 0.052 |
| iraglass | 0.000 | -0.034 | 0.000 | -0.026 | 0.000 | -0.031 | 0.000 | -0.014 |
| OfficialPCMR | 0.017 | -0.034 | 0.008 | -0.069 | 0.000 | -0.041 | 0.000 | -0.080 |
| InfinityWard | 0.000 | -0.034 | 0.000 | -0.060 | 0.000 | -0.063 | 0.000 | -0.048 |
| Bharper3407 | 0.002 | -0.034 | 0.001 | -0.062 | 0.000 | -0.047 | 0.000 | -0.031 |
| samsmith | 0.000 | -0.034 | 0.000 | -0.036 | 0.000 | 0.054 | 0.000 | -0.031 |
| jvn | 0.000 | -0.034 | 0.000 | -0.028 | 0.000 | -0.039 | 0.000 | -0.060 |
| adamlambert | 0.000 | -0.034 | 0.000 | 0.001 | 0.000 | -0.018 | 0.000 | 0.021 |
| georgelopez | 0.000 | -0.034 | 0.000 | 0.008 | 0.000 | 0.054 | 0.000 | 0.012 |
| Pinterest | 0.000 | -0.034 | 0.000 | 0.037 | 0.000 | 0.061 | 0.000 | -0.036 |
| KariByron | 0.000 | -0.033 | 0.000 | -0.034 | 0.000 | -0.043 | 0.000 | 0.032 |
| KennyOmegamanX | 0.000 | -0.033 | 0.000 | -0.083 | 0.000 | 0.006 | 0.000 | -0.094 |
| Redistrict | 0.000 | -0.033 | 0.000 | -0.052 | 0.000 | -0.073 | 0.000 | 0.010 |
| JimCantore | 0.000 | -0.033 | 0.000 | -0.046 | 0.000 | -0.088 | 0.011 | -0.073 |
| DuvalMagic | 0.000 | -0.033 | 0.000 | -0.043 | 0.000 | -0.033 | 0.000 | -0.011 |
| TGowdySC | 0.000 | -0.033 | 0.000 | -0.043 | 0.000 | -0.033 | 0.000 | -0.032 |
| IDF | 0.000 | -0.033 | 0.007 | -0.038 | 0.000 | -0.002 | 0.003 | -0.063 |
| vampireweekend | 0.000 | -0.033 | 0.000 | -0.032 | 0.000 | -0.033 | 0.000 | -0.027 |
| RLGRIME | 0.000 | -0.033 | 0.000 | -0.032 | 0.000 | -0.026 | 0.000 | -0.016 |
| MLGPuckett | 0.001 | -0.033 | 0.000 | -0.018 | 0.000 | -0.049 | 0.001 | -0.047 |
| HomeDepot | 0.005 | -0.033 | 0.000 | -0.018 | 0.000 | -0.018 | 0.000 | -0.047 |
| 3LAU | 0.000 | -0.033 | 0.000 | -0.015 | 0.000 | -0.026 | 0.000 | -0.032 |
| jeremymckinnon | 0.002 | -0.033 | 0.000 | -0.015 | 0.000 | -0.002 | 0.000 | 0.036 |
| madeon | 0.000 | -0.033 | 0.000 | -0.012 | 0.000 | -0.018 | 0.006 | -0.016 |
| Fluxpavilion | 0.004 | -0.033 | 0.000 | -0.009 | 0.000 | -0.026 | 0.000 | -0.016 |
| TriciaLockwood | 0.000 | -0.033 | 0.001 | 0.008 | 0.000 | 0.022 | 0.000 | -0.058 |
| Mark_Sheppard | 0.000 | -0.033 | 0.005 | 0.013 | 0.000 | 0.029 | 0.000 | -0.042 |
| EASPORTSFIFA | 0.000 | -0.032 | 0.005 | -0.037 | 0.000 | 0.028 | 0.000 | 0.000 |
| OpTicMiDNiTE | 0.000 | -0.032 | 0.000 | -0.020 | 0.000 | -0.032 | 0.000 | -0.066 |
| GhostStoryGames | 0.000 | -0.032 | 0.000 | 0.019 | 0.000 | -0.018 | 0.000 | -0.048 |
| VeraSweeney | 0.002 | -0.032 | 0.000 | 0.052 | 0.000 | 0.008 | 0.000 | 0.053 |
| ABC | 0.000 | -0.032 | 0.000 | -0.021 | 0.000 | -0.031 | 0.015 | -0.041 |
| kylegriffin1 | 0.003 | -0.032 | 0.001 | 0.011 | 0.000 | -0.042 | 0.000 | 0.021 |
| SpaceX | 0.000 | -0.032 | 0.000 | -0.021 | 0.000 | -0.058 | 0.002 | -0.028 |
| TheEconomist | 0.000 | -0.032 | 0.000 | 0.038 | 0.000 | 0.011 | 0.000 | 0.023 |
| Gizmodo | 0.006 | -0.032 | 0.000 | -0.031 | 0.000 | -0.073 | 0.000 | -0.010 |
| EFF | 0.000 | -0.032 | 0.001 | 0.004 | 0.000 | 0.012 | 0.000 | 0.029 |
| OldTakesExposed | 0.001 | -0.032 | 0.000 | -0.065 | 0.000 | -0.062 | 0.000 | -0.055 |
| TheYoungTurks | 0.000 | -0.032 | 0.000 | 0.007 | 0.000 | 0.006 | 0.000 | -0.035 |
| Alt_CDC | 0.000 | -0.032 | 0.000 | 0.019 | 0.000 | -0.012 | 0.001 | 0.048 |
| LinusTech | 0.002 | -0.031 | 0.000 | -0.045 | 0.000 | -0.026 | 0.000 | -0.034 |
| ashleytisdale | 0.000 | -0.031 | 0.005 | -0.001 | 0.000 | -0.097 | 0.000 | 0.010 |
| VinceZampella | 0.000 | -0.031 | 0.000 | -0.051 | 0.000 | -0.039 | 0.000 | -0.022 |
| sWooZ1e | 0.006 | -0.031 | 0.000 | -0.038 | 0.000 | -0.054 | 0.001 | -0.022 |
| Sarahchadwickk | 0.000 | -0.031 | 0.000 | -0.007 | 0.000 | -0.025 | 0.000 | -0.017 |
| coachella | 0.006 | -0.031 | 0.001 | -0.007 | 0.000 | 0.047 | 0.000 | -0.055 |
| levine | 0.000 | -0.031 | 0.002 | 0.013 | 0.000 | -0.004 | 0.000 | -0.022 |
| BingRewards | 0.004 | -0.031 | 0.014 | -0.021 | 0.000 | -0.021 | 0.000 | -0.031 |
| barstoolsports | 0.000 | -0.031 | 0.000 | -0.006 | 0.000 | 0.083 | 0.000 | -0.016 |
| peter_king | 0.000 | -0.031 | 0.000 | -0.056 | 0.000 | -0.007 | 0.000 | 0.032 |
| NateSilver538 | 0.000 | -0.031 | 0.003 | -0.013 | 0.000 | -0.022 | 0.002 | 0.033 |
| nvidia | 0.003 | -0.030 | 0.000 | -0.044 | 0.000 | -0.065 | 0.000 | 0.016 |
| cracked | 0.000 | -0.030 | 0.000 | -0.038 | 0.000 | -0.014 | 0.003 | -0.016 |
| WarrenBuffett | 0.000 | -0.030 | 0.000 | -0.068 | 0.000 | -0.091 | 0.000 | -0.022 |
| Imaqtpielol | 0.000 | -0.030 | 0.000 | -0.029 | 0.000 | 0.008 | 0.000 | -0.022 |
| usairforce | 0.000 | -0.030 | 0.000 | -0.010 | 0.000 | -0.072 | 0.000 | -0.013 |
| JKCorden | 0.000 | -0.030 | 0.000 | 0.002 | 0.000 | 0.015 | 0.000 | -0.004 |
| nikebasketball | 0.000 | -0.030 | 0.000 | 0.014 | 0.000 | -0.025 | 0.000 | -0.009 |
| VanessaHudgens | 0.000 | -0.030 | 0.000 | 0.021 | 0.000 | -0.038 | 0.000 | -0.004 |
| XboxSupport | 0.000 | -0.030 | 0.004 | -0.041 | 0.000 | -0.057 | 0.000 | -0.038 |
| SCOTUSblog | 0.007 | -0.030 | 0.000 | -0.072 | 0.000 | -0.049 | 0.000 | -0.027 |
| SarahMGellar | 0.000 | -0.030 | 0.000 | -0.043 | 0.000 | -0.033 | 0.001 | -0.042 |
| TurnerSportsEJ | 0.000 | -0.030 | 0.000 | -0.032 | 0.000 | -0.065 | 0.000 | -0.079 |
| thereallisaann | 0.001 | -0.030 | 0.000 | -0.032 | 0.000 | -0.026 | 0.000 | -0.016 |
| torproject | 0.000 | -0.030 | 0.006 | -0.032 | 0.000 | 0.022 | 0.000 | 0.004 |
| EASPORTS_MUT | 0.000 | -0.030 | 0.000 | -0.026 | 0.000 | -0.065 | 0.003 | -0.068 |
| id_593370001 | 0.000 | -0.030 | 0.000 | -0.024 | 0.000 | -0.026 | 0.000 | -0.001 |
| philivey | 0.000 | -0.030 | 0.000 | -0.004 | 0.000 | -0.010 | 0.000 | -0.022 |
| CAH | 0.000 | -0.030 | 0.000 | 0.050 | 0.000 | 0.014 | 0.000 | -0.022 |
| SenDuckworth | 0.000 | -0.030 | 0.000 | 0.056 | 0.000 | 0.014 | 0.000 | -0.001 |
| RevRunWisdom | 0.000 | -0.030 | 0.007 | 0.041 | 0.001 | 0.056 | 0.000 | 0.016 |
| Halo | 0.007 | -0.029 | 0.000 | -0.030 | 0.000 | -0.055 | 0.000 | -0.038 |
| PhilJackson11 | 0.000 | -0.029 | 0.000 | -0.040 | 0.000 | -0.087 | 0.000 | -0.072 |
| 6BillionPeople | 0.000 | -0.029 | 0.000 | -0.038 | 0.000 | -0.044 | 0.000 | -0.026 |
| th3j35t3r | 0.000 | -0.029 | 0.004 | 0.001 | 0.000 | -0.006 | 0.003 | 0.027 |
| tim_cook | 0.000 | -0.029 | 0.000 | -0.052 | 0.000 | -0.045 | 0.000 | -0.056 |
| OMGFacts | 0.002 | -0.029 | 0.000 | 0.023 | 0.000 | 0.017 | 0.000 | 0.038 |
| PostMalone | 0.000 | -0.029 | 0.003 | -0.043 | 0.001 | 0.048 | 0.001 | -0.030 |
| amazon | 0.002 | -0.029 | 0.000 | -0.012 | 0.000 | 0.013 | 0.000 | -0.034 |
| kalpenn | 0.004 | -0.029 | 0.000 | -0.007 | 0.000 | 0.022 | 0.000 | 0.020 |
| TreySongz | 0.000 | -0.029 | 0.000 | 0.014 | 0.000 | 0.010 | 0.000 | 0.012 |
| defjam | 0.000 | -0.029 | 0.002 | -0.033 | 0.000 | -0.011 | 0.000 | 0.026 |
| GoldenboyFTW | 0.000 | -0.029 | 0.000 | 0.006 | 0.000 | -0.039 | 0.000 | -0.055 |
| laurenduca | 0.001 | -0.029 | 0.000 | 0.013 | 0.000 | -0.054 | 0.000 | -0.022 |
| dnassysocial | 0.005 | -0.029 | 0.000 | 0.034 | 0.000 | 0.032 | 0.000 | -0.022 |
| OpTicGaming | 0.000 | -0.028 | 0.000 | -0.032 | 0.000 | -0.047 | 0.002 | -0.053 |
| benjaminwittes | 0.000 | -0.028 | 0.000 | 0.027 | 0.000 | -0.020 | 0.005 | 0.043 |
| PlayOverwatch | 0.003 | -0.028 | 0.000 | -0.026 | 0.000 | -0.058 | 0.014 | -0.046 |
| woot | 0.002 | -0.028 | 0.004 | -0.064 | 0.000 | -0.095 | 0.000 | 0.005 |
| firefox | 0.000 | -0.028 | 0.000 | 0.002 | 0.000 | -0.031 | 0.001 | 0.008 |
| joelcomm | 0.000 | -0.028 | 0.005 | 0.004 | 0.000 | -0.025 | 0.000 | -0.024 |
| ddlovato | 0.005 | -0.028 | 0.000 | 0.048 | 0.000 | 0.046 | 0.004 | 0.028 |
| Nike | 0.000 | -0.028 | 0.001 | -0.018 | 0.000 | -0.020 | 0.004 | -0.034 |
| IJasonAlexander | 0.003 | -0.028 | 0.004 | 0.003 | 0.000 | -0.026 | 0.000 | -0.004 |
| WalkingDead_AMC | 0.006 | -0.028 | 0.000 | -0.042 | 0.000 | -0.025 | 0.002 | 0.042 |
| Horse_ebooks | 0.000 | -0.028 | 0.000 | -0.037 | 0.000 | -0.065 | 0.000 | -0.084 |
| MSNBC | 0.000 | -0.028 | 0.001 | -0.025 | 0.000 | -0.065 | 0.000 | -0.044 |
| DadBoner | 0.000 | -0.028 | 0.000 | -0.020 | 0.000 | -0.085 | 0.000 | 0.013 |
| DonRickles | 0.000 | -0.028 | 0.000 | -0.001 | 0.000 | 0.015 | 0.000 | 0.013 |
| JoeDeLuca | 0.000 | -0.028 | 0.000 | 0.004 | 0.000 | -0.045 | 0.000 | -0.018 |
| NBCTheVoice | 0.000 | -0.028 | 0.000 | 0.055 | 0.000 | 0.075 | 0.000 | 0.013 |
| Cut4 | 0.000 | -0.028 | 0.000 | -0.078 | 0.000 | -0.011 | 0.000 | -0.060 |
| ESPNStatsInfo | 0.000 | -0.028 | 0.000 | -0.032 | 0.000 | -0.011 | 0.000 | -0.028 |
| BethesdaStudios | 0.001 | -0.028 | 0.000 | -0.023 | 0.000 | -0.011 | 0.000 | -0.057 |
| questlove | 0.000 | -0.028 | 0.006 | 0.050 | 0.000 | 0.024 | 0.000 | 0.041 |
| gameinformer | 0.002 | -0.028 | 0.000 | -0.010 | 0.000 | -0.003 | 0.000 | -0.027 |
| YourAnonNews | 0.000 | -0.027 | 0.000 | -0.031 | 0.000 | -0.003 | 0.001 | -0.035 |
| VP44 | 0.000 | -0.027 | 0.070 | 0.017 | 0.000 | -0.036 | 0.000 | -0.023 |
| Xbox | 0.000 | -0.027 | 0.000 | -0.035 | 0.000 | -0.029 | 0.000 | -0.010 |
| jimjefferies | 0.000 | -0.027 | 0.000 | -0.026 | 0.000 | 0.006 | 0.000 | -0.010 |
| Cristiano | 0.000 | -0.027 | 0.000 | -0.015 | 0.000 | -0.006 | 0.000 | 0.015 |
| TomPerez | 0.000 | -0.027 | 0.000 | -0.013 | 0.000 | -0.056 | 0.000 | -0.031 |
| soledadobrien | 0.007 | -0.027 | 0.008 | -0.004 | 0.000 | -0.050 | 0.000 | -0.064 |
| BorowitzReport | 0.000 | -0.027 | 0.000 | 0.003 | 0.000 | 0.000 | 0.000 | 0.015 |
| theMMQB | 0.000 | -0.027 | 0.000 | -0.063 | 0.000 | 0.022 | 0.000 | 0.051 |
| UWMadison | 0.000 | -0.027 | 0.000 | -0.052 | 0.000 | -0.065 | 0.000 | -0.037 |
| GottliebShow | 0.000 | -0.027 | 0.000 | -0.046 | 0.000 | -0.057 | 0.000 | -0.001 |
| Rainbow6Game | 0.001 | -0.027 | 0.000 | -0.046 | 0.000 | -0.049 | 0.008 | -0.047 |
| KailLowry | 0.000 | -0.027 | 0.000 | -0.043 | 0.000 | -0.018 | 0.000 | 0.010 |
| woodypaige | 0.007 | -0.027 | 0.013 | -0.041 | 0.000 | -0.057 | 0.000 | -0.022 |
| TESOnline | 0.000 | -0.027 | 0.000 | -0.032 | 0.000 | -0.002 | 0.000 | 0.010 |
| WorldBestGaming | 0.000 | -0.027 | 0.000 | -0.029 | 0.000 | -0.065 | 0.000 | -0.047 |
| realjoeyfatone | 0.000 | -0.027 | 0.000 | -0.029 | 0.000 | -0.002 | 0.000 | 0.010 |
| AllisonBJanney | 0.000 | -0.027 | 0.000 | -0.024 | 0.000 | -0.010 | 0.000 | 0.004 |
| Whiteboy7thst | 0.000 | -0.027 | 0.000 | -0.024 | 0.000 | -0.002 | 0.000 | -0.068 |
| TM2LeahDawn | 0.000 | -0.027 | 0.000 | -0.021 | 0.000 | -0.002 | 0.000 | -0.011 |
| SNBRNMUSIC | 0.001 | -0.027 | 0.000 | -0.018 | 0.000 | -0.026 | 0.001 | 0.010 |
| eddievanhalen | 0.000 | -0.027 | 0.000 | -0.007 | 0.000 | -0.010 | 0.003 | 0.010 |
| HowStuffWorks | 0.000 | -0.027 | 0.000 | -0.001 | 0.000 | 0.061 | 0.000 | -0.058 |
| generalelectric | 0.004 | -0.027 | 0.000 | 0.005 | 0.000 | -0.057 | 0.007 | 0.030 |
| denisleary | 0.000 | -0.027 | 0.007 | 0.010 | 0.000 | -0.002 | 0.000 | 0.030 |
| DavidRoads | 0.000 | -0.027 | 0.000 | 0.016 | 0.000 | 0.037 | 0.000 | 0.082 |
| SaraUnderwood | 0.000 | -0.027 | 0.000 | 0.022 | 0.000 | -0.033 | 0.000 | 0.004 |
| GiulianaRancic | 0.004 | -0.027 | 0.000 | 0.027 | 0.001 | 0.045 | 0.000 | 0.025 |
| DalaiLama | 0.000 | -0.026 | 0.001 | 0.004 | 0.000 | 0.038 | 0.001 | -0.006 |
| kendricklamar | 0.000 | -0.026 | 0.000 | -0.008 | 0.000 | -0.048 | 0.000 | -0.014 |
| GooglePlay | 0.000 | -0.026 | 0.000 | -0.052 | 0.000 | -0.071 | 0.000 | -0.008 |
| chelseahandler | 0.000 | -0.026 | 0.000 | -0.002 | 0.000 | -0.032 | 0.001 | 0.009 |
| andyroddick | 0.000 | -0.026 | 0.000 | -0.041 | 0.001 | -0.104 | 0.000 | -0.012 |
| FF_XIV_EN | 0.000 | -0.026 | 0.000 | -0.025 | 0.000 | -0.032 | 0.000 | -0.045 |
| VanJones68 | 0.000 | -0.026 | 0.004 | -0.023 | 0.000 | -0.018 | 0.000 | -0.026 |
| ItsFoodPorn | 0.001 | -0.026 | 0.000 | -0.007 | 0.000 | 0.018 | 0.002 | -0.026 |
| nbastats | 0.007 | -0.026 | 0.000 | -0.005 | 0.000 | -0.011 | 0.000 | -0.031 |
| emmykinney | 0.000 | -0.026 | 0.000 | -0.005 | 0.000 | 0.018 | 0.000 | 0.012 |
| EmergencyPuppy | 0.000 | -0.026 | 0.000 | 0.006 | 0.000 | -0.047 | 0.000 | -0.007 |
| G2A_com | 0.000 | -0.026 | 0.008 | -0.069 | 0.001 | -0.123 | 0.000 | -0.048 |
| thegreatkhalid | 0.000 | -0.026 | 0.000 | -0.058 | 0.000 | 0.000 | 0.000 | 0.000 |
| LupeFiasco | 0.002 | -0.026 | 0.000 | -0.023 | 0.000 | -0.026 | 0.000 | -0.028 |
| ZacharyQuinto | 0.000 | -0.026 | 0.000 | 0.025 | 0.000 | -0.010 | 0.000 | 0.054 |
| Bourdain | 0.000 | -0.026 | 0.001 | 0.015 | 0.000 | -0.002 | 0.000 | 0.001 |
| KendallJenner | 0.000 | -0.026 | 0.004 | 0.024 | 0.000 | -0.002 | 0.000 | 0.015 |
| iamrashidajones | 0.000 | -0.026 | 0.000 | -0.023 | 0.000 | -0.040 | 0.000 | -0.012 |
| engadgetgaming | 0.000 | -0.026 | 0.000 | 0.030 | 0.000 | 0.009 | 0.000 | -0.031 |
| oneplus | 0.000 | -0.026 | 0.000 | -0.036 | 0.000 | -0.044 | 0.000 | 0.027 |
| geoffkeighley | 0.000 | -0.025 | 0.001 | -0.022 | 0.000 | -0.025 | 0.000 | -0.066 |
| Reuters | 0.000 | -0.025 | 0.003 | 0.009 | 0.000 | -0.002 | 0.005 | 0.001 |
| wolfenstein | 0.002 | -0.025 | 0.000 | -0.040 | 0.000 | 0.000 | 0.000 | 0.023 |
| tjmaxx | 0.000 | -0.025 | 0.000 | 0.028 | 0.000 | -0.006 | 0.000 | 0.006 |
| Calvinn_Hobbes | 0.000 | -0.025 | 0.000 | 0.057 | 0.000 | 0.069 | 0.000 | -0.018 |
| evilhag | 0.001 | -0.025 | 0.007 | 0.034 | 0.000 | 0.039 | 0.000 | -0.011 |
| Stranger_Things | 0.000 | -0.025 | 0.000 | -0.024 | 0.000 | -0.049 | 0.010 | -0.054 |
| snooki | 0.000 | -0.025 | 0.017 | 0.027 | 0.000 | -0.007 | 0.000 | 0.059 |
| jonfavs | 0.001 | -0.024 | 0.000 | 0.002 | 0.000 | -0.049 | 0.000 | -0.005 |
| hankgreen | 0.000 | -0.024 | 0.000 | -0.037 | 0.000 | 0.060 | 0.000 | 0.022 |
| BrooklynDecker | 0.000 | -0.024 | 0.005 | -0.038 | 0.000 | -0.073 | 0.000 | 0.004 |
| therealadamwest | 0.000 | -0.024 | 0.000 | -0.032 | 0.000 | -0.026 | 0.004 | -0.032 |
| JimIrsay | 0.000 | -0.024 | 0.000 | -0.021 | 0.000 | -0.018 | 0.000 | 0.010 |
| OhMyCorgi | 0.000 | -0.024 | 0.000 | -0.018 | 0.001 | -0.010 | 0.000 | -0.011 |
| BellaTwins | 0.000 | -0.024 | 0.000 | -0.035 | 0.000 | -0.033 | 0.004 | -0.063 |
| RUSH | 0.000 | -0.024 | 0.000 | -0.029 | 0.000 | -0.010 | 0.000 | -0.022 |
| NVIDIASHIELD | 0.000 | -0.024 | 0.000 | -0.026 | 0.000 | -0.033 | 0.000 | -0.006 |
| KyleKulinski | 0.000 | -0.024 | 0.000 | -0.024 | 0.000 | 0.022 | 0.000 | -0.032 |
| AnnaKFaris | 0.000 | -0.024 | 0.000 | -0.009 | 0.000 | -0.033 | 0.000 | 0.062 |
| FreeformTV | 0.000 | -0.024 | 0.000 | -0.007 | 0.000 | -0.041 | 0.000 | -0.022 |
| buffer | 0.000 | -0.024 | 0.000 | 0.002 | 0.000 | -0.002 | 0.000 | -0.006 |
| EverydaySexism | 0.000 | -0.024 | 0.001 | 0.010 | 0.000 | 0.014 | 0.000 | -0.027 |
| Zomboy | 0.000 | -0.024 | 0.001 | 0.010 | 0.000 | 0.022 | 0.000 | 0.015 |
| id_724147846249762816 | 0.000 | -0.024 | 0.000 | 0.027 | 0.000 | -0.010 | 0.001 | 0.025 |
| falloutboy | 0.000 | -0.024 | 0.001 | 0.036 | 0.000 | -0.041 | 0.000 | 0.020 |
| Lady_Prints | 0.000 | -0.024 | 0.000 | 0.044 | 0.000 | 0.022 | 0.000 | 0.082 |
| TwitchPrime | 0.000 | -0.024 | 0.000 | 0.053 | 0.000 | -0.010 | 0.000 | 0.010 |
| CaseyNeistat | 0.000 | -0.024 | 0.000 | -0.045 | 0.000 | -0.005 | 0.000 | -0.061 |
| SenateDems | 0.002 | -0.024 | 0.000 | 0.016 | 0.000 | -0.012 | 0.000 | 0.025 |
| instagram | 0.000 | -0.024 | 0.004 | 0.011 | 0.002 | -0.004 | 0.000 | 0.012 |
| Kenny_Mayne | 0.000 | -0.023 | 0.000 | -0.080 | 0.000 | -0.083 | 0.000 | -0.031 |
| Royals | 0.002 | -0.023 | 0.000 | -0.041 | 0.000 | -0.004 | 0.002 | -0.017 |
| NoMansSky | 0.000 | -0.023 | 0.000 | -0.038 | 0.000 | -0.054 | 0.000 | -0.074 |
| flumemusic | 0.000 | -0.023 | 0.000 | -0.028 | 0.000 | -0.018 | 0.000 | -0.003 |
| telfieapp | 0.000 | -0.023 | 0.000 | -0.025 | 0.000 | -0.011 | 0.000 | -0.041 |
| Explosm | 0.000 | -0.023 | 0.000 | -0.020 | 0.000 | -0.025 | 0.000 | -0.045 |
| H1Z1 | 0.001 | -0.023 | 0.001 | -0.018 | 0.000 | -0.061 | 0.000 | 0.007 |
| DiannaAgron | 0.000 | -0.023 | 0.000 | 0.001 | 0.000 | -0.018 | 0.000 | -0.003 |
| OpTicFlamesword | 0.000 | -0.023 | 0.002 | 0.003 | 0.000 | -0.054 | 0.002 | -0.041 |
| cookiesANDclogs | 0.003 | -0.023 | 0.000 | 0.016 | 0.000 | -0.011 | 0.001 | -0.036 |
| LukeBryanOnline | 0.003 | -0.023 | 0.000 | 0.019 | 0.000 | -0.047 | 0.000 | -0.050 |
| ModernMom | 0.000 | -0.023 | 0.000 | 0.039 | 0.000 | 0.004 | 0.000 | 0.045 |
| NASCAR | 0.005 | -0.023 | 0.001 | 0.063 | 0.000 | -0.004 | 0.000 | 0.078 |
| Wendys | 0.004 | -0.023 | 0.002 | -0.045 | 0.000 | -0.072 | 0.001 | -0.045 |
| FoxNews | 0.005 | -0.023 | 0.000 | -0.023 | 0.000 | -0.019 | 0.000 | -0.033 |
| VG247 | 0.000 | -0.023 | 0.000 | -0.039 | 0.000 | -0.012 | 0.000 | -0.040 |
| Keurig | 0.007 | -0.023 | 0.000 | -0.032 | 0.000 | -0.058 | 0.000 | -0.075 |
| michaelsmith | 0.000 | -0.023 | 0.000 | -0.027 | 0.000 | -0.018 | 0.000 | -0.026 |
| 88PKane | 0.009 | -0.023 | 0.000 | -0.017 | 0.001 | -0.058 | 0.000 | -0.062 |
| Grimezsz | 0.000 | -0.023 | 0.000 | -0.017 | 0.000 | 0.002 | 0.000 | -0.013 |
| GFUELesports | 0.000 | -0.023 | 0.000 | -0.008 | 0.000 | -0.032 | 0.004 | -0.035 |
| JanelleMonae | 0.000 | -0.023 | 0.000 | 0.002 | 0.000 | 0.002 | 0.001 | 0.018 |
| OpTicMBoZe | 0.003 | -0.023 | 0.000 | 0.004 | 0.001 | -0.045 | 0.003 | -0.044 |
| Fritolay | 0.000 | -0.023 | 0.000 | 0.021 | 0.000 | 0.022 | 0.000 | 0.031 |
| Bootleg_Stuff | 0.000 | -0.023 | 0.000 | 0.028 | 0.000 | 0.008 | 0.000 | 0.026 |
| WhitneyCummings | 0.000 | -0.023 | 0.000 | 0.043 | 0.000 | 0.015 | 0.000 | 0.022 |
| Fallout | 0.000 | -0.023 | 0.003 | -0.047 | 0.000 | -0.062 | 0.000 | -0.067 |
| andersoncooper | 0.002 | -0.023 | 0.000 | -0.005 | 0.000 | -0.024 | 0.000 | -0.032 |
| Dyrus | 0.005 | -0.023 | 0.015 | -0.026 | 0.000 | 0.025 | 0.003 | -0.026 |
| MarriottRewards | 0.000 | -0.023 | 0.000 | -0.024 | 0.000 | -0.006 | 0.004 | 0.060 |
| Bjergsen | 0.000 | -0.023 | 0.000 | -0.017 | 0.000 | 0.025 | 0.000 | -0.043 |
| RealSkipBayless | 0.000 | -0.022 | 0.000 | -0.043 | 0.000 | -0.017 | 0.000 | -0.086 |
| common | 0.000 | -0.022 | 0.004 | -0.062 | 0.000 | -0.066 | 0.000 | 0.008 |
| swish41 | 0.000 | -0.022 | 0.000 | -0.013 | 0.000 | -0.043 | 0.000 | -0.031 |
| PearlJam | 0.004 | -0.022 | 0.000 | 0.031 | 0.001 | 0.034 | 0.000 | 0.082 |
| people | 0.000 | -0.022 | 0.003 | 0.042 | 0.000 | 0.057 | 0.000 | 0.051 |
| coldplay | 0.000 | -0.022 | 0.000 | 0.011 | 0.000 | -0.003 | 0.000 | 0.017 |
| VicenteFoxQue | 0.001 | -0.022 | 0.000 | 0.029 | 0.000 | -0.036 | 0.000 | -0.008 |
| PlayHearthstone | 0.006 | -0.022 | 0.000 | -0.010 | 0.001 | -0.031 | 0.000 | -0.021 |
| RokuPlayer | 0.000 | -0.022 | 0.002 | 0.017 | 0.000 | -0.005 | 0.000 | -0.011 |
| norm | 0.004 | -0.022 | 0.004 | -0.048 | 0.000 | -0.031 | 0.000 | -0.024 |
| Cloud9 | 0.000 | -0.022 | 0.000 | -0.025 | 0.000 | 0.033 | 0.000 | -0.003 |
| Alyssa_Milano | 0.000 | -0.022 | 0.000 | 0.034 | 0.000 | -0.013 | 0.000 | 0.046 |
| VineCreators | 0.000 | -0.022 | 0.004 | -0.010 | 0.000 | -0.002 | 0.000 | -0.024 |
| danieltosh | 0.000 | -0.021 | 0.000 | 0.003 | 0.000 | 0.043 | 0.000 | 0.063 |
| minakimes | 0.000 | -0.021 | 0.007 | -0.080 | 0.000 | -0.065 | 0.000 | -0.089 |
| KygoMusic | 0.000 | -0.021 | 0.003 | -0.058 | 0.000 | -0.041 | 0.001 | -0.058 |
| Marlins_Man | 0.000 | -0.021 | 0.000 | -0.038 | 0.000 | -0.010 | 0.000 | -0.073 |
| EAMaddenNFL | 0.003 | -0.021 | 0.000 | -0.021 | 0.000 | -0.041 | 0.000 | -0.016 |
| Charalanahzard | 0.000 | -0.021 | 0.000 | -0.015 | 0.000 | -0.026 | 0.000 | -0.016 |
| BigBird | 0.000 | -0.021 | 0.000 | -0.012 | 0.000 | 0.014 | 0.000 | -0.032 |
| RonFunches | 0.000 | -0.021 | 0.006 | -0.009 | 0.000 | 0.037 | 0.000 | -0.006 |
| zoesaldana | 0.000 | -0.021 | 0.000 | -0.009 | 0.000 | 0.061 | 0.001 | -0.006 |
| MrGeorgeWallace | 0.000 | -0.021 | 0.000 | -0.007 | 0.000 | 0.006 | 0.000 | 0.015 |
| sternshow | 0.000 | -0.021 | 0.000 | -0.004 | 0.000 | 0.037 | 0.000 | 0.004 |
| JordonGeneral | 0.000 | -0.021 | 0.000 | -0.001 | 0.000 | -0.041 | 0.004 | -0.032 |
| ForbesTech | 0.003 | -0.021 | 0.000 | -0.001 | 0.000 | 0.053 | 0.000 | -0.016 |
| planetmoney | 0.000 | -0.021 | 0.000 | 0.005 | 0.000 | 0.053 | 0.000 | -0.001 |
| id_737088250808926209 | 0.000 | -0.021 | 0.000 | 0.005 | 0.000 | -0.002 | 0.000 | -0.011 |
| ScienceChannel | 0.000 | -0.021 | 0.001 | 0.008 | 0.000 | -0.002 | 0.001 | 0.020 |
| DaveCoulier | 0.003 | -0.021 | 0.000 | 0.013 | 0.000 | 0.045 | 0.000 | 0.020 |
| splcenter | 0.001 | -0.021 | 0.000 | 0.016 | 0.000 | -0.010 | 0.000 | 0.015 |
| crayonscravings | 0.000 | -0.021 | 0.000 | 0.022 | 0.000 | -0.033 | 0.000 | 0.046 |
| JYSexton | 0.001 | -0.021 | 0.000 | 0.025 | 0.000 | 0.006 | 0.000 | 0.046 |
| YikYakApp | 0.000 | -0.021 | 0.011 | 0.067 | 0.000 | 0.077 | 0.000 | 0.067 |
| ArianaGrande | 0.000 | -0.021 | 0.000 | -0.019 | 0.000 | 0.001 | 0.000 | 0.025 |
| StephenCurry30 | 0.002 | -0.021 | 0.000 | -0.033 | 0.000 | -0.013 | 0.000 | -0.017 |
| Kotaku | 0.000 | -0.021 | 0.000 | -0.015 | 0.000 | -0.004 | 0.001 | 0.012 |
| aphromoo | 0.000 | -0.021 | 0.000 | -0.025 | 0.000 | 0.011 | 0.000 | -0.007 |
| TeamAllegiance | 0.000 | -0.021 | 0.000 | -0.023 | 0.000 | -0.039 | 0.000 | -0.093 |
| id_1686638119 | 0.000 | -0.021 | 0.000 | -0.020 | 0.000 | 0.004 | 0.000 | 0.007 |
| KYR_SP33DY | 0.000 | -0.021 | 0.000 | -0.010 | 0.000 | -0.039 | 0.000 | -0.041 |
| LoriGreiner | 0.000 | -0.021 | 0.000 | 0.001 | 0.000 | -0.011 | 0.000 | -0.003 |
| Revolvermag | 0.002 | -0.021 | 0.000 | 0.008 | 0.000 | 0.018 | 0.000 | 0.045 |
| leahmcelrath | 0.001 | -0.021 | 0.001 | 0.024 | 0.000 | -0.025 | 0.001 | 0.026 |
| Diddy | 0.008 | -0.021 | 0.000 | 0.035 | 0.000 | 0.004 | 0.004 | 0.047 |
| TheCUTCH22 | 0.005 | -0.020 | 0.004 | -0.039 | 0.000 | -0.005 | 0.005 | -0.022 |
| quintabrunson | 0.000 | -0.020 | 0.000 | -0.037 | 0.000 | -0.052 | 0.000 | -0.053 |
| Slate | 0.000 | -0.020 | 0.000 | 0.002 | 0.000 | -0.025 | 0.000 | -0.013 |
| BookBub | 0.000 | -0.020 | 0.000 | 0.011 | 0.000 | 0.028 | 0.000 | -0.035 |
| Joan_Rivers | 0.000 | -0.020 | 0.000 | 0.014 | 0.000 | 0.008 | 0.000 | 0.018 |
| FinnSkata | 0.000 | -0.020 | 0.000 | 0.021 | 0.000 | -0.032 | 0.000 | -0.018 |
| janemarielynch | 0.000 | -0.020 | 0.000 | 0.026 | 0.000 | 0.042 | 0.000 | 0.070 |
| KendraWilkinson | 0.000 | -0.020 | 0.000 | 0.031 | 0.000 | 0.002 | 0.000 | 0.040 |
| kurteichenwald | 0.000 | -0.020 | 0.000 | 0.040 | 0.000 | 0.002 | 0.000 | 0.013 |
| Titanfallgame | 0.000 | -0.020 | 0.000 | -0.010 | 0.000 | -0.066 | 0.000 | -0.011 |
| SeinfeldToday | 0.010 | -0.020 | 0.000 | -0.003 | 0.000 | -0.064 | 0.000 | -0.033 |
| grantimahara | 0.000 | -0.020 | 0.000 | -0.033 | 0.000 | -0.037 | 0.000 | 0.006 |
| fatbellybella | 0.000 | -0.020 | 0.000 | -0.026 | 0.000 | -0.037 | 0.000 | -0.002 |
| jemelehill | 0.000 | -0.020 | 0.000 | 0.028 | 0.000 | -0.006 | 0.000 | -0.006 |
| QtipTheAbstract | 0.000 | -0.020 | 0.000 | -0.016 | 0.000 | -0.041 | 0.000 | 0.001 |
| sesamestreet | 0.000 | -0.020 | 0.000 | 0.006 | 0.000 | 0.012 | 0.000 | 0.005 |
| hootsuite | 0.000 | -0.020 | 0.003 | 0.038 | 0.000 | 0.044 | 0.004 | -0.013 |
| HBO | 0.000 | -0.020 | 0.000 | -0.054 | 0.000 | -0.031 | 0.000 | -0.023 |
| FullFrontalSamB | 0.000 | -0.020 | 0.000 | 0.049 | 0.000 | 0.042 | 0.000 | 0.025 |
| MeekMill | 0.003 | -0.020 | 0.000 | -0.056 | 0.000 | -0.049 | 0.000 | 0.032 |
| JODYHiGHROLLER | 0.005 | -0.020 | 0.000 | -0.020 | 0.000 | 0.040 | 0.000 | 0.042 |
| MMFlint | 0.000 | -0.020 | 0.000 | 0.024 | 0.001 | -0.005 | 0.000 | -0.018 |
| khloekardashian | 0.000 | -0.019 | 0.002 | 0.027 | 0.000 | 0.004 | 0.000 | 0.042 |
| TwitterVideo | 0.000 | -0.019 | 0.000 | -0.010 | 0.000 | 0.009 | 0.000 | -0.019 |
| ScHoolboyQ | 0.013 | -0.019 | 0.000 | -0.033 | 0.000 | -0.078 | 0.000 | 0.028 |
| drdisrespect | 0.000 | -0.019 | 0.004 | -0.011 | 0.000 | -0.059 | 0.003 | -0.019 |
| NancyPelosi | 0.000 | -0.019 | 0.000 | 0.046 | 0.000 | -0.006 | 0.000 | 0.040 |
| MsCharlotteWWE | 0.000 | -0.018 | 0.001 | -0.043 | 0.000 | -0.057 | 0.000 | -0.073 |
| WillSasso | 0.000 | -0.018 | 0.000 | -0.032 | 0.000 | -0.010 | 0.000 | -0.027 |
| CapitalOne | 0.000 | -0.018 | 0.000 | -0.029 | 0.000 | -0.033 | 0.000 | -0.022 |
| CobaltStreak | 0.005 | -0.018 | 0.006 | -0.029 | 0.000 | 0.053 | 0.000 | -0.011 |
| DremTGI | 0.000 | -0.018 | 0.000 | -0.026 | 0.000 | -0.033 | 0.000 | 0.025 |
| KenTremendous | 0.000 | -0.018 | 0.000 | -0.024 | 0.000 | -0.073 | 0.000 | -0.016 |
| binance | 0.000 | -0.018 | 0.000 | -0.024 | 0.000 | -0.026 | 0.000 | -0.032 |
| officialmcafee | 0.000 | -0.018 | 0.000 | -0.021 | 0.000 | -0.041 | 0.000 | -0.068 |
| TheChainsmokers | 0.000 | -0.018 | 0.000 | -0.018 | 0.000 | -0.033 | 0.014 | 0.004 |
| pokimanelol | 0.004 | -0.018 | 0.000 | -0.015 | 0.000 | -0.026 | 0.000 | -0.084 |
| dasharez0ne | 0.000 | -0.018 | 0.000 | -0.007 | 0.000 | -0.026 | 0.000 | -0.011 |
| LZZYHALE | 0.000 | -0.018 | 0.000 | -0.007 | 0.000 | -0.026 | 0.000 | 0.036 |
| SwiftOnSecurity | 0.000 | -0.018 | 0.000 | 0.002 | 0.000 | -0.041 | 0.000 | 0.015 |
| clint_dempsey | 0.000 | -0.018 | 0.000 | 0.005 | 0.000 | -0.057 | 0.000 | -0.006 |
| Zappos | 0.000 | -0.018 | 0.000 | 0.005 | 0.000 | -0.026 | 0.000 | 0.046 |
| FreedomofPress | 0.000 | -0.018 | 0.000 | 0.013 | 0.000 | -0.041 | 0.000 | -0.016 |
| FearlessRecords | 0.000 | -0.018 | 0.000 | 0.025 | 0.000 | 0.014 | 0.000 | 0.030 |
| tomwaits | 0.000 | -0.018 | 0.000 | 0.036 | 0.000 | 0.037 | 0.000 | 0.072 |
| BenFolds | 0.000 | -0.018 | 0.000 | 0.050 | 0.000 | 0.022 | 0.001 | 0.046 |
| TCL_USA | 0.000 | -0.018 | 0.000 | 0.029 | 0.000 | -0.025 | 0.003 | 0.069 |
| CaptAndrewLuck | 0.000 | -0.018 | 0.000 | -0.062 | 0.000 | -0.090 | 0.000 | -0.026 |
| googlephotos | 0.002 | -0.018 | 0.001 | -0.046 | 0.000 | -0.068 | 0.001 | -0.041 |
| blackmirror | 0.005 | -0.018 | 0.000 | -0.041 | 0.000 | -0.054 | 0.002 | -0.088 |
| ToryBelleci | 0.000 | -0.018 | 0.000 | -0.033 | 0.000 | -0.039 | 0.000 | 0.016 |
| Psych_USA | 0.000 | -0.018 | 0.000 | -0.031 | 0.000 | -0.018 | 0.000 | -0.036 |
| KellyannePolls | 0.003 | -0.018 | 0.000 | -0.028 | 0.000 | 0.004 | 0.000 | -0.007 |
| ChelseaHouska | 0.000 | -0.018 | 0.000 | -0.025 | 0.000 | -0.004 | 0.000 | 0.002 |
| PBandJenelley_1 | 0.000 | -0.018 | 0.000 | -0.025 | 0.000 | -0.004 | 0.000 | 0.002 |
| tpolamalu | 0.000 | -0.018 | 0.000 | -0.023 | 0.001 | -0.011 | 0.000 | 0.021 |
| ggreenwald | 0.000 | -0.018 | 0.000 | -0.020 | 0.000 | -0.039 | 0.000 | 0.016 |
| scifri | 0.000 | -0.018 | 0.000 | -0.018 | 0.000 | -0.039 | 0.000 | -0.003 |
| lolesports | 0.000 | -0.018 | 0.000 | -0.007 | 0.000 | -0.011 | 0.000 | 0.021 |
| TWSNOW | 0.000 | -0.018 | 0.000 | -0.005 | 0.000 | 0.004 | 0.001 | -0.017 |
| isaiahmustafa | 0.000 | -0.018 | 0.000 | -0.002 | 0.000 | -0.004 | 0.000 | 0.026 |
| kevinolearytv | 0.000 | -0.018 | 0.000 | -0.002 | 0.000 | -0.004 | 0.000 | -0.022 |
| daniellefishel | 0.000 | -0.018 | 0.001 | 0.003 | 0.001 | -0.011 | 0.000 | 0.049 |
| BretWeinstein | 0.000 | -0.018 | 0.000 | 0.003 | 0.000 | 0.054 | 0.000 | -0.026 |
| 1inventionaday | 0.000 | -0.018 | 0.000 | 0.011 | 0.000 | 0.025 | 0.000 | -0.007 |
| jeffgerstmann | 0.000 | -0.018 | 0.002 | 0.039 | 0.000 | -0.011 | 0.001 | 0.030 |
| MagicalSiblings | 0.000 | -0.018 | 0.000 | 0.099 | 0.000 | 0.025 | 0.000 | 0.049 |
| MLBNetwork | 0.000 | -0.018 | 0.000 | -0.045 | 0.000 | 0.010 | 0.000 | -0.023 |
| jadande | 0.000 | -0.018 | 0.000 | -0.026 | 0.000 | -0.043 | 0.000 | -0.038 |
| alexisohanian | 0.000 | -0.018 | 0.000 | -0.024 | 0.000 | -0.060 | 0.000 | -0.003 |
| ObamaWhiteHouse | 0.000 | -0.018 | 0.000 | 0.035 | 0.000 | -0.041 | 0.000 | -0.022 |
| PayPal | 0.000 | -0.018 | 0.000 | -0.044 | 0.000 | -0.078 | 0.000 | -0.044 |
| AlexisRenG | 0.000 | -0.018 | 0.000 | -0.044 | 0.000 | -0.018 | 0.000 | -0.040 |
| BrianWilson38 | 0.001 | -0.018 | 0.000 | -0.034 | 0.000 | -0.032 | 0.000 | -0.022 |
| nowthisnews | 0.003 | -0.018 | 0.000 | -0.025 | 0.000 | -0.038 | 0.000 | -0.062 |
| CameronNewton | 0.000 | -0.018 | 0.009 | -0.005 | 0.000 | -0.012 | 0.000 | 0.009 |
| colinmochrie | 0.000 | -0.018 | 0.000 | -0.001 | 0.000 | 0.008 | 0.000 | -0.026 |
| pinkfloyd | 0.002 | -0.018 | 0.006 | 0.016 | 0.000 | 0.062 | 0.000 | 0.040 |
| jimcramer | 0.006 | -0.018 | 0.000 | 0.028 | 0.000 | -0.005 | 0.000 | -0.009 |
| CYBERPOWERPC | 0.007 | -0.018 | 0.003 | -0.042 | 0.000 | -0.081 | 0.000 | 0.011 |
| Tip | 0.000 | -0.018 | 0.000 | -0.033 | 0.000 | -0.037 | 0.000 | 0.019 |
| ESPNFC | 0.000 | -0.018 | 0.000 | -0.020 | 0.001 | 0.087 | 0.000 | 0.027 |
| lancearmstrong | 0.000 | -0.018 | 0.000 | -0.015 | 0.000 | -0.006 | 0.000 | 0.023 |
| JessicaSimpson | 0.000 | -0.018 | 0.000 | 0.055 | 0.000 | 0.037 | 0.000 | 0.048 |
| LiveNation | 0.000 | -0.018 | 0.000 | 0.073 | 0.000 | 0.044 | 0.000 | 0.064 |
| TheDemocrats | 0.000 | -0.018 | 0.000 | -0.001 | 0.000 | 0.013 | 0.000 | 0.030 |
| discordapp | 0.000 | -0.018 | 0.008 | 0.004 | 0.000 | -0.018 | 0.000 | 0.018 |
| KimKardashian | 0.000 | -0.018 | 0.005 | 0.037 | 0.001 | 0.013 | 0.000 | 0.003 |
| jtimberlake | 0.005 | -0.017 | 0.005 | 0.038 | 0.001 | 0.011 | 0.001 | -0.016 |
| Tesla | 0.007 | -0.017 | 0.000 | -0.050 | 0.000 | -0.060 | 0.000 | -0.025 |
| summit1g | 0.000 | -0.017 | 0.012 | -0.013 | 0.000 | -0.045 | 0.000 | -0.041 |
| diplo | 0.000 | -0.017 | 0.005 | -0.007 | 0.000 | -0.041 | 0.000 | 0.040 |
| BrunoMars | 0.003 | -0.017 | 0.000 | 0.014 | 0.000 | 0.015 | 0.007 | 0.040 |
| Windows | 0.000 | -0.016 | 0.000 | -0.062 | 0.001 | -0.079 | 0.000 | -0.039 |
| hodgman | 0.000 | -0.016 | 0.000 | -0.040 | 0.000 | -0.031 | 0.000 | -0.038 |
| runjewels | 0.000 | -0.016 | 0.000 | -0.038 | 0.000 | -0.047 | 0.000 | -0.005 |
| JLin7 | 0.007 | -0.016 | 0.000 | 0.013 | 0.000 | -0.075 | 0.001 | -0.012 |
| keithellison | 0.004 | -0.016 | 0.005 | 0.029 | 0.000 | -0.047 | 0.000 | 0.017 |
| Target | 0.000 | -0.016 | 0.000 | 0.011 | 0.000 | -0.013 | 0.000 | 0.033 |
| MaraWilson | 0.000 | -0.016 | 0.005 | 0.017 | 0.000 | 0.000 | 0.000 | -0.035 |
| Acosta | 0.005 | -0.016 | 0.001 | 0.043 | 0.000 | -0.009 | 0.000 | 0.039 |
| Razer | 0.000 | -0.016 | 0.000 | -0.008 | 0.000 | -0.041 | 0.000 | -0.007 |
| JimGaffigan | 0.004 | -0.016 | 0.000 | 0.017 | 0.000 | 0.030 | 0.000 | 0.064 |
| bethesda | 0.000 | -0.016 | 0.005 | -0.019 | 0.000 | -0.028 | 0.001 | -0.038 |
| SatoshiLite | 0.000 | -0.016 | 0.003 | -0.045 | 0.000 | 0.004 | 0.000 | -0.011 |
| ch000ch | 0.000 | -0.016 | 0.000 | 0.012 | 0.000 | -0.031 | 0.000 | 0.020 |
| DarrenCriss | 0.000 | -0.016 | 0.000 | 0.021 | 0.001 | -0.001 | 0.000 | 0.020 |
| AltHHS | 0.000 | -0.016 | 0.000 | 0.042 | 0.000 | 0.016 | 0.000 | 0.067 |
| MarthaStewart | 0.000 | -0.016 | 0.000 | 0.093 | 0.000 | 0.063 | 0.000 | 0.059 |
| meganamram | 0.000 | -0.016 | 0.001 | 0.031 | 0.000 | -0.017 | 0.000 | -0.047 |
| ProBirdRights | 0.000 | -0.016 | 0.000 | -0.031 | 0.000 | -0.019 | 0.000 | -0.064 |
| drpepper | 0.000 | -0.016 | 0.000 | -0.020 | 0.000 | -0.037 | 0.000 | -0.035 |
| adtr | 0.000 | -0.016 | 0.008 | -0.004 | 0.000 | -0.006 | 0.000 | 0.035 |
| BigBoi | 0.000 | -0.016 | 0.001 | 0.014 | 0.000 | -0.006 | 0.000 | 0.015 |
| factsionary | 0.000 | -0.016 | 0.000 | 0.043 | 0.001 | 0.050 | 0.000 | 0.085 |
| NathanFillion | 0.000 | -0.016 | 0.000 | 0.008 | 0.000 | 0.012 | 0.000 | 0.009 |
| JewelStaite | 0.000 | -0.016 | 0.000 | -0.015 | 0.000 | 0.015 | 0.002 | 0.004 |
| TheRealRyanHiga | 0.000 | -0.016 | 0.004 | 0.019 | 0.000 | 0.028 | 0.001 | -0.018 |
| PCMag | 0.000 | -0.016 | 0.000 | -0.058 | 0.000 | 0.037 | 0.000 | -0.016 |
| breaking9111 | 0.000 | -0.016 | 0.000 | -0.055 | 0.000 | -0.057 | 0.000 | -0.068 |
| elootgg | 0.001 | -0.016 | 0.000 | -0.032 | 0.000 | -0.041 | 0.000 | -0.053 |
| myspacetom | 0.000 | -0.016 | 0.000 | -0.032 | 0.000 | -0.026 | 0.001 | -0.011 |
| Muddin4Jesus | 0.000 | -0.016 | 0.000 | -0.032 | 0.000 | -0.002 | 0.000 | 0.015 |
| JesseBWatters | 0.002 | -0.016 | 0.000 | -0.021 | 0.000 | -0.026 | 0.000 | -0.006 |
| Guerrilla | 0.004 | -0.016 | 0.000 | -0.018 | 0.000 | -0.057 | 0.003 | -0.053 |
| whitesox | 0.000 | -0.016 | 0.000 | -0.018 | 0.001 | -0.033 | 0.000 | 0.004 |
| TSMTheOddOne | 0.002 | -0.016 | 0.005 | -0.018 | 0.000 | 0.006 | 0.000 | -0.022 |
| Nordstrom | 0.000 | -0.016 | 0.000 | -0.015 | 0.000 | -0.002 | 0.000 | -0.027 |
| JSWX_ | 0.002 | -0.016 | 0.000 | -0.012 | 0.000 | -0.041 | 0.000 | -0.042 |
| JimmyKimmelLive | 0.000 | -0.016 | 0.002 | -0.012 | 0.000 | 0.022 | 0.000 | -0.006 |
| BlackBerry | 0.000 | -0.016 | 0.000 | -0.007 | 0.000 | 0.006 | 0.000 | 0.030 |
| replyall | 0.000 | -0.016 | 0.000 | -0.004 | 0.000 | -0.026 | 0.000 | -0.006 |
| mcten | 0.000 | -0.016 | 0.000 | 0.002 | 0.001 | -0.010 | 0.004 | -0.084 |
| TOMS | 0.001 | -0.016 | 0.000 | 0.002 | 0.000 | -0.010 | 0.000 | -0.006 |
| AdventuresNurse | 0.000 | -0.016 | 0.000 | 0.013 | 0.000 | 0.045 | 0.000 | 0.004 |
| sxsw | 0.000 | -0.016 | 0.000 | 0.019 | 0.000 | -0.002 | 0.000 | 0.010 |
| DanRather | 0.000 | -0.016 | 0.000 | 0.022 | 0.000 | -0.049 | 0.003 | 0.015 |
| Orbitz | 0.002 | -0.016 | 0.000 | 0.027 | 0.000 | 0.006 | 0.000 | 0.030 |
| alisonhaislip | 0.000 | -0.016 | 0.000 | 0.033 | 0.000 | -0.010 | 0.000 | 0.025 |
| AngryBirds | 0.000 | -0.016 | 0.000 | 0.036 | 0.000 | -0.002 | 0.000 | -0.016 |
| Coupons | 0.000 | -0.016 | 0.000 | 0.039 | 0.000 | 0.029 | 0.000 | 0.004 |
| EucerinUS | 0.000 | -0.016 | 0.000 | 0.039 | 0.000 | 0.029 | 0.000 | 0.004 |
| CoolerMasterUSA | 0.000 | -0.016 | 0.001 | -0.033 | 0.001 | -0.018 | 0.006 | -0.022 |
| YTCreators | 0.000 | -0.016 | 0.000 | -0.028 | 0.000 | 0.018 | 0.000 | -0.069 |
| AnimalPlanet | 0.000 | -0.016 | 0.000 | -0.023 | 0.001 | -0.011 | 0.000 | -0.055 |
| Artosis | 0.004 | -0.016 | 0.000 | -0.023 | 0.000 | 0.039 | 0.002 | -0.012 |
| LanaWWE | 0.001 | -0.016 | 0.001 | -0.020 | 0.000 | -0.047 | 0.000 | -0.050 |
| Mets | 0.000 | -0.016 | 0.001 | -0.018 | 0.000 | -0.004 | 0.000 | -0.017 |
| iamscottpage | 0.000 | -0.016 | 0.000 | -0.015 | 0.000 | 0.011 | 0.000 | -0.003 |
| ppppolls | 0.002 | -0.016 | 0.000 | 0.006 | 0.000 | -0.061 | 0.000 | -0.022 |
| Clayster | 0.000 | -0.016 | 0.000 | 0.008 | 0.000 | -0.054 | 0.000 | -0.031 |
| AtlantaFalcons | 0.000 | -0.016 | 0.010 | 0.011 | 0.000 | 0.025 | 0.000 | 0.016 |
| PostGradMDL | 0.000 | -0.016 | 0.000 | 0.013 | 0.000 | -0.025 | 0.000 | 0.007 |
| dgitcom | 0.000 | -0.016 | 0.000 | 0.019 | 0.000 | 0.011 | 0.002 | 0.045 |
| ashleyfeinberg | 0.000 | -0.016 | 0.000 | 0.021 | 0.000 | 0.018 | 0.000 | -0.036 |
| TylerBaltierra | 0.000 | -0.016 | 0.000 | 0.026 | 0.000 | 0.004 | 0.000 | 0.045 |
| patrickklepek | 0.004 | -0.016 | 0.000 | 0.042 | 0.000 | 0.025 | 0.000 | -0.012 |
| LiamPayne | 0.000 | -0.016 | 0.000 | 0.047 | 0.000 | -0.047 | 0.000 | 0.021 |
| NiallOfficial | 0.000 | -0.016 | 0.000 | 0.047 | 0.000 | -0.047 | 0.000 | 0.021 |
| 1UP | 0.000 | -0.016 | 0.000 | 0.052 | 0.000 | 0.061 | 0.000 | 0.007 |
| ESPNNFL | 0.000 | -0.016 | 0.000 | -0.027 | 0.000 | 0.021 | 0.000 | -0.003 |
| SoundCloud | 0.001 | -0.015 | 0.000 | -0.029 | 0.000 | -0.020 | 0.000 | 0.020 |
| RichardDawkins | 0.000 | -0.015 | 0.000 | 0.027 | 0.000 | 0.046 | 0.000 | -0.007 |
| fjamie013 | 0.000 | -0.015 | 0.000 | -0.014 | 0.000 | -0.089 | 0.000 | -0.013 |
| Diablo | 0.000 | -0.015 | 0.000 | 0.007 | 0.000 | 0.039 | 0.000 | -0.006 |
| AnnaKendrick47 | 0.000 | -0.014 | 0.000 | 0.023 | 0.000 | -0.039 | 0.000 | 0.010 |
| repjohnlewis | 0.000 | -0.014 | 0.000 | 0.033 | 0.000 | -0.008 | 0.000 | 0.038 |
| GameSpot | 0.000 | -0.014 | 0.000 | -0.024 | 0.000 | -0.010 | 0.000 | -0.039 |
| MythBusters | 0.000 | -0.014 | 0.000 | -0.017 | 0.000 | -0.043 | 0.000 | 0.039 |
| youngthug | 0.000 | -0.014 | 0.000 | -0.011 | 0.000 | -0.007 | 0.001 | 0.039 |
| bomani_jones | 0.000 | -0.014 | 0.003 | -0.047 | 0.000 | -0.087 | 0.000 | -0.047 |
| RadioShack | 0.000 | -0.014 | 0.004 | -0.022 | 0.000 | -0.025 | 0.000 | 0.002 |
| CNET | 0.002 | -0.014 | 0.000 | -0.020 | 0.000 | -0.044 | 0.000 | -0.031 |
| MelissaJoanHart | 0.000 | -0.014 | 0.000 | -0.008 | 0.000 | -0.019 | 0.001 | -0.018 |
| id_738080573365702657 | 0.000 | -0.014 | 0.000 | 0.032 | 0.000 | 0.069 | 0.005 | 0.031 |
| KDTrey5 | 0.000 | -0.013 | 0.001 | 0.014 | 0.000 | -0.048 | 0.000 | -0.008 |
| Newegg | 0.000 | -0.013 | 0.000 | -0.050 | 0.000 | 0.003 | 0.000 | 0.008 |
| Battlefield | 0.000 | -0.013 | 0.000 | -0.028 | 0.000 | -0.092 | 0.002 | -0.021 |
| steam_games | 0.000 | -0.013 | 0.002 | -0.063 | 0.001 | -0.052 | 0.000 | -0.041 |
| E40 | 0.000 | -0.013 | 0.000 | -0.037 | 0.000 | -0.025 | 0.000 | -0.026 |
| id_160941691 | 0.001 | -0.013 | 0.000 | -0.017 | 0.000 | 0.048 | 0.000 | 0.031 |
| iHeartRadio | 0.001 | -0.013 | 0.000 | 0.057 | 0.000 | 0.075 | 0.003 | 0.062 |
| AnnCoulter | 0.000 | -0.013 | 0.004 | 0.004 | 0.000 | 0.000 | 0.000 | 0.030 |
| Walmart | 0.000 | -0.013 | 0.000 | 0.019 | 0.000 | 0.015 | 0.000 | -0.011 |
| hulu | 0.000 | -0.013 | 0.002 | 0.043 | 0.000 | -0.015 | 0.000 | -0.011 |
| tiesto | 0.000 | -0.013 | 0.000 | 0.003 | 0.000 | 0.004 | 0.000 | 0.026 |
| trailblazers | 0.000 | -0.013 | 0.000 | 0.024 | 0.000 | -0.004 | 0.000 | 0.016 |
| edmundmcmillen | 0.000 | -0.013 | 0.003 | -0.067 | 0.000 | 0.011 | 0.000 | 0.002 |
| DesusandMeroVL | 0.000 | -0.013 | 0.000 | -0.056 | 0.000 | -0.032 | 0.000 | -0.007 |
| MetroBoomin | 0.000 | -0.013 | 0.000 | -0.018 | 0.000 | -0.054 | 0.000 | 0.035 |
| Ibra_official | 0.000 | -0.013 | 0.001 | -0.010 | 0.000 | 0.032 | 0.000 | 0.045 |
| CatelynnLowell | 0.002 | -0.013 | 0.000 | 0.003 | 0.000 | -0.011 | 0.000 | 0.012 |
| LivingSocial | 0.000 | -0.013 | 0.000 | 0.011 | 0.000 | -0.061 | 0.000 | -0.036 |
| CHSommers | 0.000 | -0.013 | 0.016 | 0.013 | 0.000 | -0.011 | 0.004 | -0.031 |
| usainbolt | 0.001 | -0.013 | 0.006 | 0.016 | 0.000 | -0.039 | 0.008 | 0.049 |
| Thrifty4nsicgal | 0.000 | -0.013 | 0.000 | 0.076 | 0.000 | 0.032 | 0.000 | 0.016 |
| droid_life | 0.000 | -0.013 | 0.000 | -0.049 | 0.001 | -0.033 | 0.000 | -0.042 |
| JonnyBones | 0.003 | -0.013 | 0.000 | -0.046 | 0.000 | -0.041 | 0.000 | -0.037 |
| AmazonKindle | 0.000 | -0.013 | 0.000 | -0.032 | 0.000 | -0.073 | 0.001 | -0.047 |
| VinceMcMahon | 0.000 | -0.013 | 0.002 | -0.032 | 0.000 | -0.057 | 0.000 | -0.079 |
| ultra | 0.000 | -0.013 | 0.000 | -0.032 | 0.000 | -0.010 | 0.006 | 0.020 |
| JenSelter | 0.000 | -0.013 | 0.001 | -0.026 | 0.000 | 0.006 | 0.000 | 0.062 |
| gaileyfrey | 0.001 | -0.013 | 0.000 | -0.015 | 0.001 | -0.065 | 0.000 | 0.004 |
| LGUSAMobile | 0.000 | -0.013 | 0.000 | -0.012 | 0.000 | -0.041 | 0.000 | -0.001 |
| davidaxelrod | 0.008 | -0.013 | 0.000 | -0.009 | 0.000 | -0.026 | 0.000 | 0.025 |
| JINX | 0.000 | -0.013 | 0.000 | -0.004 | 0.000 | -0.002 | 0.000 | 0.036 |
| myfabolouslife | 0.002 | -0.013 | 0.000 | 0.002 | 0.000 | -0.026 | 0.000 | 0.072 |
| LEGO_Group | 0.000 | -0.013 | 0.000 | 0.002 | 0.000 | -0.002 | 0.000 | -0.022 |
| goldenglobes | 0.000 | -0.013 | 0.000 | 0.005 | 0.000 | -0.049 | 0.000 | 0.020 |
| JohnWall | 0.000 | -0.013 | 0.000 | 0.005 | 0.000 | -0.041 | 0.000 | 0.010 |
| WIREDScience | 0.000 | -0.013 | 0.000 | 0.010 | 0.000 | -0.065 | 0.000 | 0.020 |
| MohawkFlooring | 0.000 | -0.013 | 0.001 | 0.016 | 0.000 | 0.022 | 0.000 | 0.030 |
| Hanes | 0.000 | -0.013 | 0.000 | 0.030 | 0.000 | 0.029 | 0.000 | -0.011 |
| CecileRichards | 0.000 | -0.013 | 0.000 | 0.033 | 0.000 | -0.010 | 0.000 | 0.020 |
| yashar | 0.000 | -0.013 | 0.020 | 0.061 | 0.000 | 0.014 | 0.000 | 0.015 |
| LinkedIn | 0.000 | -0.013 | 0.000 | 0.067 | 0.000 | 0.037 | 0.000 | 0.015 |
| BillNye | 0.000 | -0.013 | 0.034 | 0.041 | 0.007 | 0.093 | 0.000 | 0.029 |
| clarkgregg | 0.000 | -0.013 | 0.000 | -0.019 | 0.000 | -0.015 | 0.001 | -0.024 |
| unfoRETTAble | 0.000 | -0.013 | 0.003 | -0.012 | 0.000 | -0.068 | 0.000 | -0.010 |
| Cmdr_Hadfield | 0.000 | -0.013 | 0.001 | -0.008 | 0.000 | -0.031 | 0.000 | 0.005 |
| ItsJoshPeck | 0.000 | -0.013 | 0.000 | 0.021 | 0.001 | 0.012 | 0.001 | -0.003 |
| redbox | 0.001 | -0.012 | 0.000 | -0.023 | 0.000 | -0.025 | 0.000 | -0.042 |
| TEAMEVGA | 0.000 | -0.012 | 0.000 | -0.054 | 0.000 | -0.096 | 0.000 | -0.015 |
| tarastrong | 0.000 | -0.012 | 0.006 | 0.019 | 0.000 | -0.001 | 0.000 | 0.008 |
| KidCudi | 0.000 | -0.012 | 0.018 | 0.023 | 0.000 | 0.033 | 0.000 | 0.073 |
| wizkhalifa | 0.001 | -0.012 | 0.000 | 0.025 | 0.000 | -0.007 | 0.000 | 0.119 |
| KeithOlbermann | 0.000 | -0.011 | 0.000 | 0.033 | 0.001 | 0.018 | 0.002 | -0.003 |
| GhettoHikes | 0.000 | -0.011 | 0.000 | -0.020 | 0.000 | -0.050 | 0.002 | 0.019 |
| charlieINTEL | 0.000 | -0.011 | 0.001 | 0.010 | 0.000 | -0.037 | 0.000 | -0.014 |
| TIME | 0.000 | -0.011 | 0.000 | -0.027 | 0.000 | -0.048 | 0.006 | -0.030 |
| TFLN | 0.000 | -0.011 | 0.000 | 0.012 | 0.000 | -0.032 | 0.000 | 0.037 |
| kanyewest | 0.000 | -0.011 | 0.001 | -0.031 | 0.001 | 0.035 | 0.000 | -0.025 |
| pixelatedboat | 0.000 | -0.011 | 0.000 | -0.047 | 0.000 | -0.077 | 0.000 | -0.055 |
| _FloridaMan | 0.001 | -0.011 | 0.003 | -0.035 | 0.000 | -0.013 | 0.000 | 0.041 |
| BGibbles | 0.000 | -0.011 | 0.000 | -0.051 | 0.000 | 0.002 | 0.000 | -0.031 |
| ChicagoBears | 0.000 | -0.011 | 0.000 | -0.034 | 0.000 | 0.008 | 0.001 | 0.048 |
| packers | 0.000 | -0.011 | 0.000 | -0.013 | 0.000 | -0.012 | 0.000 | 0.000 |
| Mariners | 0.011 | -0.011 | 0.000 | 0.014 | 0.000 | -0.038 | 0.000 | -0.044 |
| JENNIWOWW | 0.000 | -0.011 | 0.000 | 0.014 | 0.000 | 0.008 | 0.006 | 0.040 |
| KeriHilson | 0.000 | -0.011 | 0.000 | 0.033 | 0.000 | 0.008 | 0.000 | 0.018 |
| msjwilly | 0.000 | -0.011 | 0.000 | 0.043 | 0.000 | 0.008 | 0.000 | 0.075 |
| Crutchfield | 0.000 | -0.011 | 0.000 | 0.043 | 0.000 | 0.042 | 0.000 | 0.040 |
| Oatmeal | 0.000 | -0.011 | 0.000 | 0.001 | 0.000 | -0.027 | 0.000 | -0.024 |
| TLDoublelift | 0.000 | -0.011 | 0.002 | -0.033 | 0.000 | 0.001 | 0.005 | -0.031 |
| JamieNoTweet | 0.003 | -0.011 | 0.000 | -0.027 | 0.000 | -0.025 | 0.000 | 0.033 |
| maroon5 | 0.000 | -0.011 | 0.000 | 0.004 | 0.000 | -0.020 | 0.000 | 0.015 |
| ShamsCharania | 0.006 | -0.010 | 0.000 | -0.049 | 0.000 | -0.039 | 0.001 | -0.031 |
| BigGhostLtd | 0.000 | -0.010 | 0.000 | -0.046 | 0.000 | -0.032 | 0.000 | 0.026 |
| coindesk | 0.000 | -0.010 | 0.018 | -0.036 | 0.000 | 0.025 | 0.000 | -0.017 |
| LenovoLegion | 0.000 | -0.010 | 0.000 | -0.031 | 0.000 | -0.047 | 0.000 | -0.069 |
| OCZStorage | 0.001 | -0.010 | 0.000 | -0.018 | 0.000 | -0.011 | 0.001 | 0.021 |
| id_736784706486734852 | 0.000 | -0.010 | 0.000 | -0.010 | 0.000 | -0.047 | 0.000 | -0.031 |
| dexbonus | 0.001 | -0.010 | 0.000 | -0.010 | 0.000 | -0.018 | 0.000 | 0.002 |
| getbentsaggy | 0.005 | -0.010 | 0.000 | -0.010 | 0.000 | 0.004 | 0.000 | -0.012 |
| hmusa | 0.001 | -0.010 | 0.000 | -0.010 | 0.000 | 0.039 | 0.000 | -0.022 |
| AlbertBrooks | 0.000 | -0.010 | 0.000 | -0.002 | 0.000 | -0.004 | 0.000 | 0.002 |
| 1future | 0.000 | -0.010 | 0.000 | 0.001 | 0.000 | -0.025 | 0.000 | 0.068 |
| PeriscopeCo | 0.001 | -0.010 | 0.004 | 0.001 | 0.000 | 0.004 | 0.000 | -0.045 |
| birbigs | 0.000 | -0.010 | 0.000 | 0.016 | 0.000 | -0.011 | 0.000 | -0.026 |
| googleanalytics | 0.000 | -0.010 | 0.000 | 0.024 | 0.000 | 0.011 | 0.000 | 0.012 |
| iJesseWilliams | 0.000 | -0.010 | 0.000 | 0.034 | 0.000 | -0.004 | 0.000 | -0.022 |
| JamesMartinSJ | 0.000 | -0.010 | 0.000 | 0.042 | 0.000 | -0.032 | 0.002 | 0.054 |
| RealLamarOdom | 0.000 | -0.010 | 0.000 | 0.045 | 0.000 | 0.025 | 0.000 | 0.049 |
| mshowalter | 0.000 | -0.010 | 0.000 | 0.050 | 0.000 | 0.025 | 0.000 | -0.003 |
| tacobell | 0.014 | -0.010 | 0.000 | -0.018 | 0.000 | -0.012 | 0.000 | 0.004 |
| SarahKSilverman | 0.001 | -0.010 | 0.011 | 0.085 | 0.000 | 0.050 | 0.000 | 0.064 |
| JalenRose | 0.000 | -0.010 | 0.000 | -0.005 | 0.000 | 0.008 | 0.000 | -0.053 |
| prattprattpratt | 0.000 | -0.010 | 0.001 | 0.028 | 0.000 | -0.004 | 0.003 | 0.017 |
| DeionSanders | 0.000 | -0.010 | 0.009 | -0.049 | 0.000 | -0.049 | 0.003 | -0.011 |
| googledevs | 0.000 | -0.010 | 0.000 | -0.041 | 0.000 | -0.033 | 0.001 | -0.032 |
| NVIDIAEmbedded | 0.000 | -0.010 | 0.000 | -0.041 | 0.000 | -0.026 | 0.000 | 0.015 |
| CharlesWieand | 0.000 | -0.010 | 0.010 | -0.038 | 0.000 | -0.057 | 0.000 | -0.022 |
| ToshibaUSA | 0.000 | -0.010 | 0.000 | -0.032 | 0.000 | -0.033 | 0.000 | -0.016 |
| RADickey43 | 0.000 | -0.010 | 0.000 | -0.029 | 0.000 | -0.033 | 0.000 | 0.010 |
| netskymusic | 0.000 | -0.010 | 0.005 | -0.024 | 0.000 | -0.002 | 0.000 | -0.032 |
| disclosure | 0.000 | -0.010 | 0.004 | -0.021 | 0.000 | -0.026 | 0.000 | 0.015 |
| TheMindyProject | 0.000 | -0.010 | 0.000 | -0.007 | 0.000 | -0.057 | 0.000 | -0.006 |
| mmfa | 0.000 | -0.010 | 0.000 | -0.007 | 0.000 | 0.022 | 0.000 | 0.010 |
| OFA | 0.000 | -0.010 | 0.002 | -0.004 | 0.000 | -0.057 | 0.000 | -0.016 |
| TheRickWilson | 0.000 | -0.010 | 0.000 | -0.001 | 0.000 | -0.041 | 0.000 | 0.036 |
| Space_Station | 0.000 | -0.010 | 0.000 | -0.001 | 0.000 | 0.084 | 0.000 | -0.001 |
| DatDudeBP | 0.000 | -0.010 | 0.000 | 0.002 | 0.000 | 0.006 | 0.000 | 0.004 |
| hastr0 | 0.000 | -0.010 | 0.000 | 0.005 | 0.000 | -0.041 | 0.000 | -0.022 |
| michellebranch | 0.000 | -0.010 | 0.000 | 0.008 | 0.001 | -0.026 | 0.000 | 0.025 |
| BadAdviceDog | 0.000 | -0.010 | 0.000 | 0.008 | 0.000 | -0.010 | 0.000 | 0.025 |
| AlexAllTimeLow | 0.000 | -0.010 | 0.000 | 0.008 | 0.000 | -0.002 | 0.000 | -0.011 |
| AlexGaskarth | 0.000 | -0.010 | 0.000 | 0.008 | 0.000 | -0.002 | 0.004 | -0.011 |
| CauseWereTech | 0.000 | -0.010 | 0.000 | 0.010 | 0.000 | 0.014 | 0.000 | -0.006 |
| MichellePhan | 0.000 | -0.010 | 0.000 | 0.010 | 0.000 | 0.014 | 0.000 | 0.036 |
| leyawn | 0.000 | -0.010 | 0.000 | 0.019 | 0.001 | 0.014 | 0.000 | 0.004 |
| bridgitmendler | 0.000 | -0.010 | 0.000 | 0.022 | 0.000 | -0.033 | 0.002 | 0.062 |
| wyclef | 0.003 | -0.010 | 0.001 | 0.036 | 0.000 | 0.077 | 0.000 | 0.010 |
| NAACP | 0.000 | -0.010 | 0.000 | 0.039 | 0.000 | -0.002 | 0.000 | 0.025 |
| SattelizerGames | 0.000 | -0.010 | 0.002 | 0.047 | 0.000 | 0.006 | 0.000 | 0.067 |
| aasif | 0.000 | -0.010 | 0.000 | 0.061 | 0.000 | 0.037 | 0.000 | 0.025 |
| shitmydadsays | 0.000 | -0.010 | 0.000 | 0.007 | 0.000 | 0.031 | 0.000 | 0.020 |
| sorola | 0.000 | -0.010 | 0.002 | -0.036 | 0.000 | 0.010 | 0.000 | 0.008 |
| masseffect | 0.000 | -0.010 | 0.000 | -0.026 | 0.000 | -0.060 | 0.000 | -0.050 |
| assassinscreed | 0.000 | -0.010 | 0.000 | 0.023 | 0.000 | -0.013 | 0.000 | 0.012 |
| Cheezburger | 0.000 | -0.010 | 0.000 | 0.027 | 0.000 | -0.007 | 0.000 | 0.036 |
| UN | 0.001 | -0.010 | 0.000 | 0.042 | 0.000 | 0.010 | 0.000 | 0.032 |
| NVIDIAGeForce | 0.001 | -0.010 | 0.009 | -0.040 | 0.000 | -0.072 | 0.001 | -0.052 |
| starwars | 0.000 | -0.009 | 0.001 | -0.027 | 0.000 | 0.018 | 0.002 | 0.011 |
| CIA | 0.000 | -0.009 | 0.000 | -0.029 | 0.000 | -0.010 | 0.000 | 0.020 |
| TechCrunch | 0.002 | -0.009 | 0.000 | 0.014 | 0.000 | -0.028 | 0.000 | -0.005 |
| NICKIMINAJ | 0.000 | -0.009 | 0.018 | 0.043 | 0.000 | -0.027 | 0.000 | -0.033 |
| telltalegames | 0.000 | -0.009 | 0.000 | 0.046 | 0.000 | 0.015 | 0.000 | 0.011 |
| BBCBreaking | 0.002 | -0.009 | 0.002 | 0.004 | 0.000 | -0.020 | 0.005 | 0.005 |
| AchievementHunt | 0.000 | -0.009 | 0.003 | -0.042 | 0.000 | 0.000 | 0.000 | -0.002 |
| FaZeClan | 0.004 | -0.009 | 0.003 | -0.015 | 0.000 | -0.031 | 0.000 | -0.047 |
| SHGames | 0.000 | -0.009 | 0.005 | -0.002 | 0.000 | -0.044 | 0.000 | -0.051 |
| WindhorstESPN | 0.000 | -0.009 | 0.004 | 0.003 | 0.000 | 0.000 | 0.000 | -0.022 |
| SarahCAndersen | 0.005 | -0.009 | 0.000 | 0.012 | 0.000 | 0.000 | 0.000 | -0.055 |
| KrisJenner | 0.000 | -0.009 | 0.001 | 0.012 | 0.000 | 0.012 | 0.000 | 0.027 |
| TheWeirdWorld | 0.000 | -0.009 | 0.000 | 0.012 | 0.000 | 0.037 | 0.009 | 0.064 |
| HouseDemocrats | 0.000 | -0.009 | 0.000 | 0.013 | 0.000 | 0.001 | 0.000 | 0.019 |
| FortniteGame | 0.000 | -0.009 | 0.000 | -0.015 | 0.000 | 0.012 | 0.000 | -0.004 |
| ChelseaClinton | 0.004 | -0.009 | 0.001 | 0.038 | 0.000 | -0.069 | 0.005 | -0.025 |
| NBA2K | 0.000 | -0.009 | 0.000 | -0.017 | 0.000 | -0.065 | 0.006 | -0.009 |
| Discovery | 0.000 | -0.009 | 0.000 | 0.011 | 0.000 | 0.015 | 0.000 | -0.040 |
| davidguetta | 0.001 | -0.009 | 0.000 | 0.023 | 0.000 | -0.005 | 0.000 | 0.035 |
| esurance | 0.000 | -0.009 | 0.000 | 0.033 | 0.000 | 0.015 | 0.001 | 0.018 |
| id_776198324747575297 | 0.000 | -0.009 | 0.000 | 0.033 | 0.000 | 0.022 | 0.000 | 0.022 |
| windowscentral | 0.000 | -0.009 | 0.000 | 0.038 | 0.000 | -0.005 | 0.000 | 0.057 |
| DavidBowieReal | 0.000 | -0.009 | 0.000 | 0.050 | 0.000 | 0.075 | 0.000 | 0.013 |
| Adele | 0.002 | -0.008 | 0.000 | 0.048 | 0.000 | 0.029 | 0.000 | 0.034 |
| googlemaps | 0.000 | -0.008 | 0.003 | 0.001 | 0.000 | -0.042 | 0.000 | -0.012 |
| XboxP3 | 0.000 | -0.008 | 0.000 | 0.037 | 0.000 | -0.025 | 0.001 | 0.028 |
| trvisXX | 0.000 | -0.008 | 0.000 | -0.004 | 0.001 | -0.045 | 0.000 | -0.005 |
| billyeichner | 0.005 | -0.008 | 0.000 | 0.009 | 0.000 | -0.011 | 0.000 | -0.034 |
| YouTube | 0.000 | -0.008 | 0.000 | -0.029 | 0.000 | -0.014 | 0.000 | 0.007 |
| amyschumer | 0.000 | -0.008 | 0.009 | 0.050 | 0.000 | -0.021 | 0.000 | -0.008 |
| yosp | 0.000 | -0.008 | 0.000 | -0.051 | 0.000 | -0.018 | 0.000 | 0.026 |
| jonahray | 0.000 | -0.008 | 0.002 | -0.031 | 0.000 | -0.011 | 0.000 | -0.074 |
| DaveChappelle | 0.010 | -0.008 | 0.000 | -0.023 | 0.000 | -0.061 | 0.009 | 0.045 |
| boniver | 0.003 | -0.008 | 0.006 | -0.020 | 0.000 | 0.025 | 0.000 | -0.022 |
| DJPaulyD | 0.000 | -0.008 | 0.000 | -0.005 | 0.000 | -0.011 | 0.000 | 0.068 |
| SNLUpdate | 0.003 | -0.008 | 0.003 | 0.019 | 0.001 | 0.004 | 0.003 | 0.035 |
| boring_as_heck | 0.000 | -0.008 | 0.002 | 0.026 | 0.000 | -0.011 | 0.000 | 0.002 |
| carrieunderwood | 0.000 | -0.008 | 0.000 | 0.034 | 0.001 | -0.054 | 0.001 | 0.054 |
| gwenstefani | 0.000 | -0.008 | 0.000 | 0.034 | 0.000 | 0.047 | 0.001 | 0.021 |
| SamHarrisOrg | 0.006 | -0.008 | 0.000 | 0.037 | 0.000 | 0.047 | 0.000 | -0.012 |
| dbrand | 0.002 | -0.008 | 0.000 | -0.045 | 0.000 | -0.077 | 0.000 | -0.013 |
| altonbrown | 0.001 | -0.008 | 0.000 | 0.022 | 0.000 | -0.003 | 0.000 | 0.044 |
| timkaine | 0.000 | -0.008 | 0.000 | 0.073 | 0.000 | 0.019 | 0.000 | 0.029 |
| IronStache | 0.000 | -0.008 | 0.000 | 0.003 | 0.000 | -0.036 | 0.001 | -0.021 |
| HilaryDuff | 0.000 | -0.008 | 0.000 | 0.028 | 0.001 | -0.036 | 0.004 | -0.014 |
| KylieJenner | 0.000 | -0.007 | 0.000 | 0.040 | 0.000 | -0.012 | 0.003 | 0.009 |
| MerriamWebster | 0.000 | -0.007 | 0.000 | 0.017 | 0.000 | -0.010 | 0.000 | 0.002 |
| SamsungMobileUS | 0.002 | -0.007 | 0.000 | 0.052 | 0.001 | 0.085 | 0.000 | 0.053 |
| thewhitepanda | 0.000 | -0.007 | 0.000 | -0.038 | 0.001 | 0.022 | 0.000 | -0.016 |
| NetflixIsAJoke | 0.000 | -0.007 | 0.004 | -0.032 | 0.000 | 0.029 | 0.000 | -0.027 |
| clmazin | 0.000 | -0.007 | 0.001 | -0.026 | 0.000 | -0.026 | 0.000 | -0.011 |
| gwatsky | 0.000 | -0.007 | 0.001 | -0.026 | 0.000 | -0.010 | 0.001 | -0.042 |
| TPAIN | 0.000 | -0.007 | 0.000 | -0.024 | 0.000 | -0.026 | 0.000 | -0.047 |
| sprint | 0.000 | -0.007 | 0.000 | -0.021 | 0.000 | -0.033 | 0.000 | 0.025 |
| TechGuided | 0.000 | -0.007 | 0.000 | -0.018 | 0.000 | -0.049 | 0.000 | -0.001 |
| GAEMS_PGE | 0.000 | -0.007 | 0.000 | -0.015 | 0.000 | -0.057 | 0.000 | -0.037 |
| seanseaevans | 0.000 | -0.007 | 0.004 | -0.015 | 0.000 | -0.041 | 0.002 | 0.004 |
| Codecademy | 0.000 | -0.007 | 0.000 | -0.012 | 0.000 | -0.065 | 0.000 | -0.073 |
| microcenter | 0.000 | -0.007 | 0.000 | -0.009 | 0.000 | -0.026 | 0.000 | 0.046 |
| MeteosLoL | 0.000 | -0.007 | 0.000 | -0.009 | 0.000 | 0.014 | 0.000 | 0.004 |
| Hai | 0.000 | -0.007 | 0.000 | -0.009 | 0.000 | 0.014 | 0.000 | 0.004 |
| TedRubin | 0.000 | -0.007 | 0.000 | -0.007 | 0.000 | -0.041 | 0.000 | -0.011 |
| id_733170759829327874 | 0.004 | -0.007 | 0.000 | -0.007 | 0.000 | -0.018 | 0.000 | -0.001 |
| RiotJatt | 0.000 | -0.007 | 0.000 | -0.004 | 0.000 | 0.053 | 0.000 | 0.004 |
| debsylee | 0.000 | -0.007 | 0.006 | 0.005 | 0.000 | -0.010 | 0.007 | -0.027 |
| NeedforSpeed | 0.000 | -0.007 | 0.000 | 0.013 | 0.000 | -0.010 | 0.000 | 0.015 |
| amomstake | 0.000 | -0.007 | 0.000 | 0.019 | 0.000 | 0.037 | 0.000 | -0.001 |
| TherealTaraji | 0.002 | -0.007 | 0.000 | 0.022 | 0.000 | 0.006 | 0.000 | 0.036 |
| FinishLine | 0.006 | -0.007 | 0.000 | 0.030 | 0.000 | -0.018 | 0.000 | 0.015 |
| id_798234950 | 0.000 | -0.007 | 0.000 | 0.033 | 0.000 | 0.022 | 0.000 | 0.010 |
| BabySavers | 0.000 | -0.007 | 0.000 | 0.033 | 0.000 | 0.061 | 0.000 | 0.010 |
| VANS_66 | 0.000 | -0.007 | 0.000 | 0.036 | 0.000 | 0.006 | 0.000 | 0.020 |
| LisaLampanelli | 0.000 | -0.007 | 0.000 | 0.039 | 0.001 | 0.053 | 0.000 | -0.001 |
| 5minutesformom | 0.000 | -0.007 | 0.001 | 0.059 | 0.000 | 0.014 | 0.002 | -0.001 |
| TrevorProject | 0.000 | -0.007 | 0.000 | 0.064 | 0.004 | 0.084 | 0.000 | 0.030 |
| RevDrBarber | 0.000 | -0.007 | 0.000 | 0.084 | 0.000 | -0.018 | 0.002 | 0.072 |
| wwwbigbaldhead | 0.004 | -0.007 | 0.015 | -0.006 | 0.000 | -0.017 | 0.000 | 0.017 |
| ebertchicago | 0.000 | -0.007 | 0.000 | 0.073 | 0.000 | 0.081 | 0.000 | 0.054 |
| VeryLonelyLuke | 0.000 | -0.007 | 0.000 | -0.020 | 0.000 | -0.019 | 0.000 | -0.006 |
| PokemonGoApp | 0.000 | -0.007 | 0.000 | -0.040 | 0.000 | -0.011 | 0.000 | -0.003 |
| yelyahwilliams | 0.000 | -0.007 | 0.000 | 0.020 | 0.000 | -0.031 | 0.000 | 0.012 |
| donaldglover | 0.009 | -0.006 | 0.000 | -0.041 | 0.000 | -0.045 | 0.000 | -0.031 |
| Fahrenthold | 0.000 | -0.006 | 0.000 | 0.046 | 0.000 | 0.018 | 0.000 | 0.011 |
| Twitter | 0.019 | -0.006 | 0.000 | 0.007 | 0.000 | 0.022 | 0.000 | 0.036 |
| NHLBruins | 0.000 | -0.006 | 0.000 | -0.025 | 0.000 | -0.052 | 0.000 | -0.066 |
| LegionHoops | 0.000 | -0.006 | 0.000 | -0.017 | 0.001 | 0.068 | 0.000 | -0.044 |
| SenJohnMcCain | 0.001 | -0.006 | 0.000 | 0.016 | 0.000 | -0.038 | 0.002 | -0.004 |
| echofoxgg | 0.000 | -0.006 | 0.000 | 0.016 | 0.000 | 0.022 | 0.000 | -0.031 |
| paulpierce34 | 0.000 | -0.006 | 0.000 | 0.035 | 0.000 | 0.002 | 0.000 | 0.009 |
| SquareEnix | 0.000 | -0.006 | 0.000 | 0.048 | 0.000 | 0.015 | 0.000 | 0.032 |
| jack_p | 0.000 | -0.006 | 0.000 | -0.067 | 0.000 | 0.000 | 0.006 | -0.055 |
| Oreo | 0.000 | -0.006 | 0.001 | 0.032 | 0.000 | 0.005 | 0.000 | 0.010 |
| KillerMike | 0.004 | -0.005 | 0.000 | -0.030 | 0.000 | -0.031 | 0.003 | -0.011 |
| MichaelAvenatti | 0.006 | -0.005 | 0.000 | 0.004 | 0.000 | -0.031 | 0.000 | 0.024 |
| oldmansearch | 0.000 | -0.005 | 0.000 | -0.033 | 0.000 | -0.032 | 0.000 | 0.026 |
| Uber | 0.000 | -0.005 | 0.000 | -0.020 | 0.000 | -0.011 | 0.000 | -0.031 |
| Giants | 0.000 | -0.005 | 0.000 | -0.012 | 0.000 | -0.011 | 0.000 | -0.026 |
| PabloTorre | 0.000 | -0.005 | 0.006 | 0.003 | 0.000 | -0.011 | 0.000 | -0.041 |
| druidDUDE | 0.000 | -0.005 | 0.000 | 0.003 | 0.000 | 0.004 | 0.000 | -0.012 |
| kevinlove | 0.000 | -0.005 | 0.000 | 0.008 | 0.000 | -0.025 | 0.001 | -0.012 |
| imogenheap | 0.000 | -0.005 | 0.000 | 0.011 | 0.000 | 0.004 | 0.000 | 0.040 |
| COVERGIRL | 0.000 | -0.005 | 0.000 | 0.019 | 0.000 | -0.011 | 0.000 | 0.021 |
| KyrieIrving | 0.000 | -0.005 | 0.000 | 0.021 | 0.000 | -0.047 | 0.003 | -0.022 |
| SaraBareilles | 0.000 | -0.005 | 0.000 | 0.021 | 0.000 | 0.004 | 0.000 | 0.040 |
| id_802646542779813889 | 0.000 | -0.005 | 0.000 | 0.024 | 0.000 | -0.018 | 0.000 | -0.050 |
| BedBathBeyond | 0.006 | -0.005 | 0.000 | 0.024 | 0.000 | 0.039 | 0.000 | -0.017 |
| DonnaChaffins | 0.000 | -0.005 | 0.006 | 0.029 | 0.000 | 0.047 | 0.000 | 0.002 |
| elonmusk | 0.000 | -0.005 | 0.000 | -0.065 | 0.000 | -0.059 | 0.000 | -0.042 |
| CocaCola | 0.000 | -0.005 | 0.000 | 0.011 | 0.000 | -0.004 | 0.000 | -0.017 |
| MAINGEAR | 0.000 | -0.005 | 0.013 | 0.015 | 0.000 | -0.009 | 0.000 | -0.073 |
| Google | 0.000 | -0.005 | 0.000 | -0.012 | 0.001 | -0.011 | 0.000 | 0.040 |
| SteelSeries | 0.011 | -0.005 | 0.002 | -0.022 | 0.000 | -0.056 | 0.000 | -0.047 |
| NickSwardson | 0.000 | -0.005 | 0.000 | -0.017 | 0.000 | -0.044 | 0.000 | 0.002 |
| TheAtlantic | 0.000 | -0.005 | 0.000 | 0.010 | 0.000 | 0.000 | 0.000 | 0.027 |
| TimOfLegend | 0.001 | -0.005 | 0.000 | 0.034 | 0.000 | 0.056 | 0.000 | -0.043 |
| wefollow | 0.000 | -0.005 | 0.012 | 0.057 | 0.000 | 0.075 | 0.003 | 0.043 |
| oliviawilde | 0.000 | -0.005 | 0.000 | 0.009 | 0.000 | 0.018 | 0.000 | -0.015 |
| chrisrock | 0.000 | -0.005 | 0.005 | -0.013 | 0.000 | 0.020 | 0.000 | -0.009 |
| VideoGameVoters | 0.005 | -0.004 | 0.000 | -0.060 | 0.000 | -0.041 | 0.000 | 0.015 |
| THEKIDMERO | 0.000 | -0.004 | 0.000 | -0.052 | 0.000 | -0.018 | 0.000 | -0.022 |
| Chilis | 0.000 | -0.004 | 0.000 | -0.032 | 0.000 | -0.033 | 0.000 | 0.025 |
| TheEvilWithin | 0.002 | -0.004 | 0.000 | -0.026 | 0.000 | -0.018 | 0.000 | 0.020 |
| Snoopy | 0.000 | -0.004 | 0.000 | -0.024 | 0.000 | -0.010 | 0.000 | -0.037 |
| ktanaka13 | 0.000 | -0.004 | 0.000 | -0.024 | 0.000 | 0.014 | 0.000 | 0.025 |
| Lakers | 0.000 | -0.004 | 0.000 | -0.024 | 0.000 | 0.045 | 0.000 | 0.030 |
| AJemaineClement | 0.000 | -0.004 | 0.000 | -0.015 | 0.000 | -0.018 | 0.000 | 0.020 |
| DyingLightGame | 0.000 | -0.004 | 0.000 | -0.015 | 0.000 | -0.010 | 0.000 | 0.036 |
| ericbolling | 0.013 | -0.004 | 0.000 | -0.009 | 0.000 | -0.002 | 0.000 | 0.004 |
| MPG | 0.000 | -0.004 | 0.000 | -0.007 | 0.000 | 0.006 | 0.000 | 0.004 |
| Longreads | 0.000 | -0.004 | 0.000 | -0.007 | 0.000 | 0.029 | 0.000 | -0.022 |
| watchdogsgame | 0.000 | -0.004 | 0.000 | -0.001 | 0.000 | -0.041 | 0.000 | 0.004 |
| dallascowboys | 0.000 | -0.004 | 0.000 | 0.010 | 0.000 | 0.014 | 0.000 | 0.015 |
| THEsaragilbert | 0.000 | -0.004 | 0.002 | 0.010 | 0.000 | 0.077 | 0.000 | 0.010 |
| MiRx | 0.000 | -0.004 | 0.000 | 0.013 | 0.000 | -0.026 | 0.000 | -0.022 |
| NayaRivera | 0.000 | -0.004 | 0.007 | 0.019 | 0.000 | 0.006 | 0.000 | 0.030 |
| aots | 0.008 | -0.004 | 0.000 | 0.025 | 0.000 | 0.037 | 0.000 | 0.025 |
| marshalls | 0.000 | -0.004 | 0.000 | 0.030 | 0.001 | 0.022 | 0.008 | 0.025 |
| ZAGGdaily | 0.000 | -0.004 | 0.000 | 0.042 | 0.000 | 0.022 | 0.000 | 0.036 |
| BarstoolDucks | 0.000 | -0.004 | 0.013 | 0.044 | 0.000 | -0.026 | 0.000 | -0.011 |
| 7onashoestring | 0.004 | -0.004 | 0.000 | 0.047 | 0.000 | 0.061 | 0.000 | 0.004 |
| ourfamlifestyle | 0.000 | -0.004 | 0.000 | 0.047 | 0.000 | 0.061 | 0.000 | 0.004 |
| swingleft | 0.000 | -0.004 | 0.000 | 0.053 | 0.000 | 0.006 | 0.000 | 0.051 |
| DigitalTrends | 0.011 | -0.004 | 0.000 | -0.030 | 0.000 | -0.045 | 0.000 | -0.029 |
| MikeTrout | 0.000 | -0.004 | 0.010 | -0.007 | 0.000 | 0.020 | 0.000 | 0.036 |
| ChloeGMoretz | 0.000 | -0.004 | 0.000 | 0.041 | 0.001 | 0.031 | 0.000 | 0.036 |
| EmmaWatson | 0.000 | -0.004 | 0.000 | 0.003 | 0.000 | -0.033 | 0.000 | 0.021 |
| BustaRhymes | 0.000 | -0.004 | 0.002 | 0.030 | 0.000 | 0.031 | 0.000 | 0.043 |
| ananavarro | 0.003 | -0.004 | 0.000 | 0.084 | 0.000 | 0.010 | 0.000 | 0.081 |
| Joe_Gatto | 0.000 | -0.004 | 0.000 | -0.029 | 0.000 | -0.045 | 0.000 | -0.018 |
| richardbranson | 0.000 | -0.004 | 0.003 | -0.015 | 0.000 | -0.045 | 0.000 | -0.044 |
| BadAstronomer | 0.000 | -0.004 | 0.000 | -0.008 | 0.000 | -0.018 | 0.000 | -0.048 |
| Discover | 0.000 | -0.004 | 0.000 | -0.001 | 0.000 | -0.018 | 0.000 | 0.009 |
| kicksonfire | 0.000 | -0.004 | 0.000 | 0.019 | 0.000 | -0.025 | 0.000 | -0.013 |
| RepJoeKennedy | 0.000 | -0.004 | 0.000 | 0.035 | 0.000 | 0.048 | 0.000 | 0.035 |
| levarburton | 0.006 | -0.003 | 0.004 | 0.030 | 0.000 | 0.027 | 0.000 | 0.050 |
| Naughty_Dog | 0.000 | -0.003 | 0.003 | -0.037 | 0.000 | -0.082 | 0.000 | 0.012 |
| googlechrome | 0.003 | -0.003 | 0.000 | -0.019 | 0.000 | -0.078 | 0.000 | 0.012 |
| Schwarzenegger | 0.000 | -0.003 | 0.000 | 0.033 | 0.000 | 0.032 | 0.000 | 0.042 |
| LILBTHEBASEDGOD | 0.006 | -0.003 | 0.019 | -0.061 | 0.000 | 0.028 | 0.000 | -0.038 |
| NPR | 0.001 | -0.003 | 0.000 | -0.001 | 0.000 | 0.019 | 0.000 | -0.063 |
| Alienware | 0.000 | -0.003 | 0.000 | -0.012 | 0.000 | -0.031 | 0.000 | 0.012 |
| the_ironsheik | 0.000 | -0.003 | 0.000 | -0.004 | 0.000 | 0.007 | 0.010 | 0.033 |
| StationCDRKelly | 0.005 | -0.003 | 0.001 | 0.011 | 0.000 | 0.033 | 0.001 | 0.022 |
| tameimpala | 0.000 | -0.003 | 0.003 | -0.054 | 0.000 | 0.061 | 0.000 | -0.026 |
| MLBPipeline | 0.007 | -0.003 | 0.000 | -0.043 | 0.000 | -0.018 | 0.000 | -0.026 |
| SinghLions | 0.000 | -0.003 | 0.000 | -0.031 | 0.000 | -0.025 | 0.000 | -0.003 |
| MettaWorldPeace | 0.010 | -0.003 | 0.001 | -0.031 | 0.000 | 0.004 | 0.000 | 0.007 |
| JamesOKeefeIII | 0.007 | -0.003 | 0.000 | -0.020 | 0.000 | -0.025 | 0.000 | -0.074 |
| RealMickFoley | 0.000 | -0.003 | 0.008 | 0.013 | 0.000 | -0.018 | 0.000 | -0.036 |
| hodakotb | 0.000 | -0.003 | 0.000 | 0.024 | 0.000 | -0.004 | 0.000 | -0.003 |
| JanetJackson | 0.000 | -0.003 | 0.007 | 0.039 | 0.000 | 0.018 | 0.000 | 0.026 |
| beatonna | 0.000 | -0.003 | 0.000 | 0.052 | 0.000 | -0.004 | 0.000 | -0.012 |
| giantbomb | 0.000 | -0.003 | 0.000 | 0.060 | 0.000 | 0.039 | 0.000 | 0.021 |
| Clorox | 0.000 | -0.003 | 0.005 | 0.068 | 0.000 | 0.039 | 0.000 | 0.016 |
| MoonPie | 0.000 | -0.002 | 0.010 | -0.040 | 0.000 | -0.056 | 0.000 | -0.031 |
| APStylebook | 0.000 | -0.002 | 0.000 | -0.006 | 0.000 | -0.025 | 0.000 | 0.023 |
| FloydMayweather | 0.000 | -0.002 | 0.000 | -0.004 | 0.000 | -0.031 | 0.000 | 0.006 |
| MikePereira | 0.000 | -0.002 | 0.002 | 0.005 | 0.000 | -0.006 | 0.000 | -0.035 |
| LeaMichele | 0.000 | -0.002 | 0.000 | 0.021 | 0.000 | 0.019 | 0.000 | 0.031 |
| jimmyfallon | 0.003 | -0.002 | 0.005 | 0.063 | 0.000 | 0.062 | 0.000 | 0.038 |
| LeagueOfLegends | 0.000 | -0.002 | 0.009 | -0.005 | 0.000 | 0.036 | 0.000 | -0.004 |
| BreakingBad_AMC | 0.000 | -0.002 | 0.000 | 0.008 | 0.000 | -0.015 | 0.000 | -0.024 |
| dominos | 0.000 | -0.002 | 0.000 | 0.044 | 0.000 | 0.032 | 0.000 | 0.067 |
| feliciaday | 0.000 | -0.002 | 0.000 | -0.002 | 0.000 | 0.004 | 0.000 | -0.001 |
| allsongs | 0.000 | -0.002 | 0.000 | -0.029 | 0.000 | -0.002 | 0.000 | 0.015 |
| BQQuinn | 0.000 | -0.002 | 0.000 | -0.021 | 0.000 | -0.057 | 0.000 | -0.001 |
| ItsTheInventory | 0.000 | -0.002 | 0.001 | -0.021 | 0.000 | -0.010 | 0.000 | -0.011 |
| EmmyCic | 0.000 | -0.002 | 0.006 | -0.018 | 0.000 | -0.002 | 0.000 | 0.046 |
| SalVulcano | 0.000 | -0.002 | 0.001 | -0.009 | 0.000 | -0.041 | 0.000 | 0.010 |
| SierraClub | 0.000 | -0.002 | 0.000 | -0.009 | 0.000 | -0.010 | 0.003 | 0.025 |
| JonHeyman | 0.000 | -0.002 | 0.003 | -0.004 | 0.000 | 0.014 | 0.000 | 0.015 |
| AnaKasparian | 0.002 | -0.002 | 0.001 | 0.002 | 0.000 | -0.002 | 0.000 | -0.016 |
| BBC_TopGear | 0.000 | -0.002 | 0.000 | 0.005 | 0.000 | 0.014 | 0.000 | 0.004 |
| BrittPettibone | 0.000 | -0.002 | 0.018 | 0.005 | 0.000 | 0.045 | 0.000 | -0.001 |
| IndieGala | 0.000 | -0.002 | 0.000 | 0.013 | 0.000 | 0.061 | 0.000 | 0.020 |
| business | 0.002 | -0.002 | 0.000 | 0.013 | 0.000 | 0.061 | 0.000 | 0.025 |
| jessetyler | 0.000 | -0.002 | 0.000 | 0.016 | 0.000 | -0.033 | 0.000 | -0.011 |
| TimHowardGK | 0.000 | -0.002 | 0.000 | 0.019 | 0.000 | -0.026 | 0.002 | 0.010 |
| id_525312787 | 0.000 | -0.002 | 0.000 | 0.019 | 0.000 | 0.006 | 0.000 | 0.020 |
| TVietor08 | 0.002 | -0.002 | 0.000 | 0.022 | 0.001 | -0.073 | 0.000 | -0.001 |
| LittleDebbie | 0.000 | -0.002 | 0.000 | 0.022 | 0.000 | 0.014 | 0.000 | 0.020 |
| PdxInteractive | 0.000 | -0.002 | 0.000 | 0.022 | 0.000 | 0.069 | 0.000 | -0.001 |
| pattymo | 0.000 | -0.002 | 0.000 | 0.025 | 0.000 | -0.026 | 0.000 | -0.001 |
| HollyyLive | 0.000 | -0.002 | 0.000 | 0.030 | 0.000 | -0.033 | 0.000 | -0.022 |
| OpTicUpdate | 0.006 | -0.002 | 0.000 | 0.030 | 0.000 | -0.033 | 0.000 | -0.022 |
| JKap415 | 0.000 | -0.002 | 0.000 | 0.030 | 0.000 | -0.033 | 0.000 | -0.022 |
| OpTicHitch | 0.000 | -0.002 | 0.000 | 0.030 | 0.000 | -0.033 | 0.000 | -0.022 |
| leighalexander | 0.000 | -0.002 | 0.000 | 0.030 | 0.000 | -0.002 | 0.000 | 0.004 |
| PlayersTribune | 0.000 | -0.002 | 0.000 | 0.030 | 0.000 | 0.006 | 0.000 | 0.020 |
| KiLLa_Sloss | 0.000 | -0.002 | 0.000 | 0.036 | 0.000 | -0.026 | 0.000 | -0.001 |
| Choire | 0.000 | -0.002 | 0.000 | 0.036 | 0.000 | 0.022 | 0.000 | 0.004 |
| williamvsweeney | 0.002 | -0.002 | 0.006 | 0.044 | 0.000 | 0.053 | 0.000 | 0.077 |
| Janefonda | 0.000 | -0.002 | 0.000 | 0.078 | 0.000 | 0.069 | 0.000 | 0.077 |
| AstroKatie | 0.000 | -0.002 | 0.000 | 0.093 | 0.000 | 0.022 | 0.007 | 0.062 |
| Sodapoppintv | 0.000 | -0.001 | 0.000 | -0.017 | 0.000 | -0.045 | 0.032 | 0.026 |
| davidaldridgedc | 0.000 | -0.001 | 0.000 | -0.013 | 0.000 | -0.072 | 0.000 | -0.088 |
| id_147580943 | 0.000 | -0.001 | 0.000 | -0.008 | 0.000 | -0.012 | 0.000 | 0.018 |
| jon_bois | 0.000 | -0.001 | 0.000 | -0.008 | 0.000 | -0.005 | 0.003 | -0.031 |
| amazontechdeals | 0.000 | -0.001 | 0.000 | -0.008 | 0.000 | 0.015 | 0.000 | -0.022 |
| tomhaberstroh | 0.000 | -0.001 | 0.000 | -0.003 | 0.000 | 0.002 | 0.000 | -0.044 |
| JERICHO | 0.000 | -0.001 | 0.003 | 0.004 | 0.000 | -0.025 | 0.004 | -0.035 |
| GUBLERNATION | 0.006 | -0.001 | 0.001 | 0.004 | 0.000 | -0.025 | 0.001 | -0.031 |
| joeyBADASS | 0.005 | -0.001 | 0.000 | 0.004 | 0.000 | 0.022 | 0.000 | 0.035 |
| Im_TheAntiTrump | 0.000 | -0.001 | 0.000 | 0.009 | 0.000 | -0.045 | 0.000 | 0.013 |
| robertherjavec | 0.000 | -0.001 | 0.000 | 0.009 | 0.000 | 0.022 | 0.000 | 0.004 |
| Interior | 0.000 | -0.001 | 0.000 | 0.011 | 0.000 | -0.058 | 0.000 | -0.035 |
| RetailMeNot | 0.000 | -0.001 | 0.000 | 0.019 | 0.000 | -0.012 | 0.001 | 0.009 |
| jumblejim | 0.000 | -0.001 | 0.000 | 0.033 | 0.000 | 0.042 | 0.000 | -0.004 |
| RandPaul | 0.002 | -0.001 | 0.000 | -0.028 | 0.000 | -0.007 | 0.000 | -0.038 |
| TwitchSupport | 0.004 | -0.001 | 0.000 | -0.023 | 0.000 | -0.068 | 0.000 | -0.027 |
| Forbes | 0.000 | -0.001 | 0.000 | 0.000 | 0.001 | 0.023 | 0.000 | -0.034 |
| CBSNews | 0.000 | -0.001 | 0.016 | 0.002 | 0.000 | -0.001 | 0.000 | 0.005 |
| PrimeVideo | 0.023 | -0.001 | 0.013 | 0.016 | 0.000 | 0.017 | 0.000 | 0.002 |
| Dropbox | 0.000 | -0.001 | 0.004 | -0.047 | 0.001 | -0.082 | 0.000 | -0.036 |
| JohnStamos | 0.000 | 0.000 | 0.000 | 0.036 | 0.000 | 0.040 | 0.001 | 0.047 |
| benshapiro | 0.000 | 0.000 | 0.002 | -0.023 | 0.000 | 0.012 | 0.000 | 0.034 |
| sarahkendzior | 0.000 | 0.000 | 0.006 | 0.062 | 0.000 | -0.020 | 0.000 | 0.050 |
| Jon_Favreau | 0.000 | 0.000 | 0.000 | 0.051 | 0.001 | 0.066 | 0.000 | 0.030 |
| asvpxrocky | 0.000 | 0.000 | 0.000 | -0.030 | 0.000 | -0.053 | 0.006 | 0.017 |
| TimTebow | 0.000 | 0.000 | 0.007 | 0.003 | 0.000 | 0.020 | 0.000 | 0.040 |
| FoodNetwork | 0.000 | 0.000 | 0.006 | 0.059 | 0.000 | 0.020 | 0.000 | 0.021 |
| HomerJSimpson | 0.000 | 0.000 | 0.000 | -0.022 | 0.000 | -0.044 | 0.000 | -0.022 |
| marcorubio | 0.000 | 0.000 | 0.000 | -0.004 | 0.000 | -0.019 | 0.000 | -0.022 |
| NHC_Atlantic | 0.000 | 0.000 | 0.000 | 0.019 | 0.000 | -0.050 | 0.000 | -0.010 |
| BearGrylls | 0.000 | 0.000 | 0.000 | -0.031 | 0.000 | 0.000 | 0.000 | 0.011 |
| id_818927131883356161 | 0.000 | 0.000 | 0.000 | -0.017 | 0.000 | 0.012 | 0.000 | -0.047 |
| SBNation | 0.000 | 0.000 | 0.000 | 0.011 | 0.000 | 0.011 | 0.000 | 0.035 |
| AlexaBliss_WWE | 0.000 | 0.000 | 0.000 | -0.046 | 0.000 | -0.061 | 0.004 | -0.050 |
| TheSims | 0.000 | 0.000 | 0.000 | -0.020 | 0.000 | -0.011 | 0.000 | -0.083 |
| davidcrosss | 0.000 | 0.000 | 0.000 | 0.011 | 0.000 | 0.011 | 0.000 | 0.035 |
| TheScaryNature | 0.000 | 0.000 | 0.000 | 0.011 | 0.000 | 0.018 | 0.001 | 0.021 |
| KMillar15 | 0.000 | 0.000 | 0.001 | -0.020 | 0.000 | 0.025 | 0.000 | 0.016 |
| NintendoNYC | 0.000 | 0.000 | 0.000 | -0.049 | 0.000 | -0.061 | 0.000 | 0.026 |
| GrantWahl | 0.005 | 0.000 | 0.000 | -0.002 | 0.000 | -0.032 | 0.000 | 0.007 |
| bitwitkyle | 0.000 | 0.000 | 0.001 | 0.006 | 0.000 | 0.047 | 0.000 | 0.073 |
| jes_chastain | 0.000 | 0.000 | 0.000 | 0.047 | 0.000 | 0.018 | 0.000 | 0.007 |
| Jonathan_Blow | 0.000 | 0.000 | 0.006 | 0.063 | 0.000 | 0.011 | 0.000 | -0.007 |
| billwurtz | 0.000 | 0.000 | 0.000 | -0.020 | 0.000 | 0.025 | 0.000 | 0.002 |
| reddit_AMA | 0.000 | 0.000 | 0.000 | -0.020 | 0.000 | 0.032 | 0.000 | 0.035 |
| ehesketh | 0.005 | 0.000 | 0.000 | 0.060 | 0.000 | 0.025 | 0.000 | 0.054 |
| WDCreators | 0.001 | 0.000 | 0.000 | -0.015 | 0.000 | -0.054 | 0.006 | -0.007 |
| maddow | 0.000 | 0.000 | 0.008 | 0.072 | 0.000 | 0.036 | 0.000 | 0.061 |
| steveyeun | 0.000 | 0.001 | 0.004 | -0.012 | 0.000 | -0.020 | 0.000 | 0.015 |
| SeanBeeson | 0.000 | 0.001 | 0.000 | 0.006 | 0.000 | -0.009 | 0.000 | -0.034 |
| FINALLEVEL | 0.000 | 0.001 | 0.000 | 0.027 | 0.000 | 0.051 | 0.000 | 0.028 |
| USATODAY | 0.000 | 0.001 | 0.000 | 0.011 | 0.000 | -0.032 | 0.001 | -0.004 |
| 8_Semesters | 0.000 | 0.001 | 0.000 | 0.031 | 0.000 | -0.005 | 0.000 | 0.022 |
| GuyKawasaki | 0.000 | 0.001 | 0.000 | 0.038 | 0.000 | -0.025 | 0.001 | 0.000 |
| Oprah | 0.000 | 0.001 | 0.005 | 0.024 | 0.001 | 0.016 | 0.000 | 0.017 |
| gleamapp | 0.000 | 0.001 | 0.000 | -0.032 | 0.000 | -0.033 | 0.000 | -0.042 |
| Activision | 0.000 | 0.001 | 0.003 | -0.026 | 0.000 | -0.033 | 0.000 | -0.006 |
| yungleann | 0.004 | 0.001 | 0.000 | -0.021 | 0.000 | 0.045 | 0.000 | 0.020 |
| PlayStationEU | 0.000 | 0.001 | 0.000 | -0.018 | 0.000 | -0.033 | 0.000 | 0.015 |
| HardwareUnboxed | 0.001 | 0.001 | 0.000 | -0.018 | 0.000 | -0.002 | 0.004 | 0.046 |
| TechYESCity | 0.000 | 0.001 | 0.000 | -0.018 | 0.000 | 0.014 | 0.000 | 0.072 |
| robhuebel | 0.000 | 0.001 | 0.000 | -0.015 | 0.000 | 0.014 | 0.003 | -0.022 |
| Pobelter | 0.000 | 0.001 | 0.000 | 0.005 | 0.000 | 0.037 | 0.000 | 0.025 |
| AliceMartin8 | 0.000 | 0.001 | 0.000 | 0.005 | 0.000 | -0.002 | 0.002 | 0.056 |
| JeffBryanDavis | 0.000 | 0.001 | 0.003 | 0.005 | 0.000 | 0.022 | 0.000 | -0.032 |
| Audien | 0.000 | 0.001 | 0.000 | 0.008 | 0.000 | -0.033 | 0.005 | 0.020 |
| 4everBrandy | 0.000 | 0.001 | 0.003 | 0.008 | 0.000 | -0.010 | 0.000 | 0.025 |
| lululemon | 0.000 | 0.001 | 0.000 | 0.010 | 0.000 | -0.041 | 0.000 | -0.037 |
| DavidBHayter | 0.000 | 0.001 | 0.000 | 0.013 | 0.000 | 0.022 | 0.000 | -0.022 |
| JessicaBiel | 0.000 | 0.001 | 0.002 | 0.016 | 0.000 | -0.033 | 0.000 | -0.006 |
| Mattdavelewis | 0.001 | 0.001 | 0.002 | 0.025 | 0.000 | 0.053 | 0.002 | 0.041 |
| GTOmegaRacing | 0.000 | 0.001 | 0.000 | 0.033 | 0.000 | -0.018 | 0.005 | 0.062 |
| PsyonixStudios | 0.000 | 0.001 | 0.000 | 0.033 | 0.000 | 0.006 | 0.000 | 0.046 |
| PlumeComics | 0.000 | 0.001 | 0.000 | 0.036 | 0.000 | 0.006 | 0.000 | -0.032 |
| belk | 0.000 | 0.001 | 0.000 | 0.042 | 0.000 | 0.045 | 0.000 | -0.001 |
| chescaleigh | 0.000 | 0.001 | 0.000 | 0.044 | 0.000 | 0.014 | 0.000 | 0.030 |
| alroker | 0.004 | 0.001 | 0.000 | 0.050 | 0.000 | -0.018 | 0.007 | -0.011 |
| NewYorkStateAG | 0.000 | 0.001 | 0.000 | 0.050 | 0.000 | -0.018 | 0.000 | 0.072 |
| tylergposey | 0.000 | 0.001 | 0.000 | 0.056 | 0.000 | -0.002 | 0.000 | 0.062 |
| larrywilmore | 0.000 | 0.001 | 0.008 | 0.076 | 0.000 | 0.045 | 0.000 | 0.036 |
| HIDEO_KOJIMA_EN | 0.003 | 0.001 | 0.003 | 0.065 | 0.006 | 0.103 | 0.000 | 0.048 |
| robdelaney | 0.001 | 0.001 | 0.000 | 0.006 | 0.000 | 0.022 | 0.000 | 0.003 |
| SEGA | 0.000 | 0.001 | 0.004 | -0.025 | 0.000 | -0.009 | 0.000 | 0.039 |
| DXRacer | 0.000 | 0.002 | 0.004 | 0.006 | 0.000 | -0.020 | 0.000 | 0.006 |
| SenSchumer | 0.000 | 0.002 | 0.000 | 0.034 | 0.001 | 0.000 | 0.000 | 0.030 |
| brckhmptn | 0.000 | 0.002 | 0.000 | 0.019 | 0.000 | 0.031 | 0.000 | 0.025 |
| steveo | 0.000 | 0.002 | 0.000 | 0.027 | 0.000 | 0.025 | 0.001 | 0.003 |
| tumblr | 0.000 | 0.002 | 0.000 | 0.031 | 0.000 | 0.042 | 0.000 | -0.034 |
| PPFA | 0.000 | 0.002 | 0.000 | 0.043 | 0.000 | -0.014 | 0.000 | -0.023 |
| GhostfaceKillah | 0.001 | 0.002 | 0.002 | -0.024 | 0.000 | -0.025 | 0.000 | 0.031 |
| HRC | 0.000 | 0.002 | 0.000 | 0.077 | 0.003 | 0.100 | 0.000 | 0.048 |
| rickygervais | 0.000 | 0.002 | 0.001 | 0.025 | 0.001 | 0.065 | 0.000 | 0.018 |
| trnrtips | 0.000 | 0.002 | 0.003 | -0.069 | 0.000 | -0.054 | 0.000 | 0.016 |
| CommunityTV | 0.000 | 0.002 | 0.000 | -0.036 | 0.000 | -0.075 | 0.000 | -0.031 |
| FractalJosh | 0.011 | 0.002 | 0.000 | -0.007 | 0.000 | -0.018 | 0.010 | 0.073 |
| BillyCrystal | 0.000 | 0.002 | 0.000 | -0.007 | 0.000 | -0.004 | 0.002 | -0.022 |
| ProJared | 0.000 | 0.002 | 0.000 | -0.002 | 0.000 | -0.039 | 0.000 | -0.031 |
| pourmecoffee | 0.000 | 0.002 | 0.000 | -0.002 | 0.000 | -0.018 | 0.000 | 0.021 |
| FusionCash | 0.000 | 0.002 | 0.000 | -0.002 | 0.000 | -0.011 | 0.000 | -0.041 |
| Swag_Winners | 0.000 | 0.002 | 0.000 | 0.001 | 0.000 | -0.025 | 0.000 | -0.045 |
| MAJORLAZER | 0.000 | 0.002 | 0.000 | 0.006 | 0.000 | -0.061 | 0.005 | 0.026 |
| EvilGeniuses | 0.007 | 0.002 | 0.000 | 0.019 | 0.000 | -0.004 | 0.000 | -0.003 |
| thelaurengraham | 0.001 | 0.002 | 0.000 | 0.021 | 0.000 | -0.011 | 0.001 | 0.002 |
| Fwiz | 0.000 | 0.002 | 0.000 | 0.032 | 0.000 | -0.032 | 0.000 | -0.022 |
| DragonCon | 0.003 | 0.002 | 0.012 | 0.032 | 0.000 | 0.025 | 0.000 | 0.012 |
| BlackSabbath | 0.000 | 0.002 | 0.005 | 0.068 | 0.000 | 0.032 | 0.000 | 0.026 |
| Respawn | 0.000 | 0.003 | 0.007 | -0.012 | 0.002 | -0.036 | 0.000 | -0.006 |
| johnlegend | 0.004 | 0.003 | 0.002 | 0.078 | 0.000 | 0.069 | 0.000 | 0.081 |
| ClickHole | 0.013 | 0.003 | 0.000 | -0.053 | 0.000 | -0.066 | 0.000 | 0.020 |
| engadget | 0.000 | 0.003 | 0.003 | 0.011 | 0.000 | -0.074 | 0.000 | 0.074 |
| VP | 0.000 | 0.003 | 0.000 | -0.008 | 0.000 | -0.007 | 0.009 | 0.000 |
| WSJ | 0.000 | 0.003 | 0.000 | 0.002 | 0.000 | -0.017 | 0.000 | -0.003 |
| BBCWorld | 0.000 | 0.003 | 0.000 | 0.019 | 0.000 | 0.003 | 0.002 | 0.008 |
| RandyOrton | 0.000 | 0.003 | 0.007 | -0.046 | 0.000 | -0.072 | 0.002 | -0.075 |
| Buck | 0.000 | 0.003 | 0.000 | -0.034 | 0.000 | -0.045 | 0.000 | -0.004 |
| Fred_Delicious | 0.000 | 0.003 | 0.000 | -0.025 | 0.000 | -0.018 | 0.000 | -0.070 |
| internetofshit | 0.000 | 0.003 | 0.000 | -0.003 | 0.000 | -0.032 | 0.006 | 0.004 |
| margaretcho | 0.000 | 0.004 | 0.002 | 0.069 | 0.000 | 0.031 | 0.000 | 0.037 |
| id_822215673812119553 | 0.000 | 0.004 | 0.000 | 0.014 | 0.000 | 0.009 | 0.001 | -0.017 |
| OneLouderApps | 0.002 | 0.004 | 0.007 | -0.037 | 0.000 | -0.040 | 0.000 | -0.041 |
| Sarah_Hyland | 0.000 | 0.004 | 0.003 | 0.039 | 0.000 | 0.020 | 0.000 | 0.058 |
| NOH8Campaign | 0.000 | 0.004 | 0.001 | 0.057 | 0.003 | 0.131 | 0.000 | 0.017 |
| joshgad | 0.007 | 0.004 | 0.000 | 0.047 | 0.000 | 0.036 | 0.007 | 0.028 |
| BernieSanders | 0.004 | 0.004 | 0.004 | 0.011 | 0.000 | -0.033 | 0.000 | -0.034 |
| WuTangClan | 0.002 | 0.004 | 0.000 | -0.055 | 0.000 | -0.026 | 0.000 | 0.030 |
| WhitlockJason | 0.001 | 0.004 | 0.001 | -0.032 | 0.000 | -0.049 | 0.000 | -0.001 |
| FrankCaliendo | 0.000 | 0.004 | 0.000 | -0.029 | 0.000 | -0.033 | 0.000 | 0.015 |
| WWEBrayWyatt | 0.000 | 0.004 | 0.000 | -0.029 | 0.002 | -0.010 | 0.000 | -0.073 |
| id_750214136236171265 | 0.000 | 0.004 | 0.000 | -0.024 | 0.000 | -0.010 | 0.000 | -0.053 |
| greggutfeld | 0.000 | 0.004 | 0.002 | -0.007 | 0.000 | -0.010 | 0.000 | -0.011 |
| 2020Panel | 0.019 | 0.004 | 0.000 | -0.004 | 0.000 | -0.057 | 0.000 | 0.036 |
| MTVGeek | 0.000 | 0.004 | 0.000 | 0.002 | 0.000 | -0.010 | 0.000 | 0.051 |
| tomsegura | 0.000 | 0.004 | 0.000 | 0.002 | 0.001 | 0.053 | 0.000 | -0.016 |
| NRA | 0.000 | 0.004 | 0.000 | 0.005 | 0.000 | -0.018 | 0.000 | 0.020 |
| krispykreme | 0.000 | 0.004 | 0.003 | 0.013 | 0.000 | 0.006 | 0.000 | -0.011 |
| HamiltonBeach | 0.000 | 0.004 | 0.000 | 0.019 | 0.000 | -0.033 | 0.000 | 0.062 |
| issues | 0.000 | 0.004 | 0.000 | 0.022 | 0.000 | 0.006 | 0.000 | 0.004 |
| celtics | 0.000 | 0.004 | 0.000 | 0.027 | 0.001 | -0.010 | 0.003 | -0.032 |
| TychoBrahe | 0.000 | 0.004 | 0.000 | 0.027 | 0.000 | 0.045 | 0.000 | 0.036 |
| morewless | 0.000 | 0.004 | 0.000 | 0.039 | 0.000 | 0.022 | 0.000 | 0.051 |
| G_Eazy | 0.000 | 0.004 | 0.000 | 0.047 | 0.000 | 0.006 | 0.002 | 0.020 |
| RobynsWorld | 0.000 | 0.004 | 0.000 | 0.053 | 0.000 | 0.022 | 0.000 | 0.020 |
| GearsViking | 0.000 | 0.004 | 0.003 | 0.053 | 0.001 | 0.045 | 0.000 | 0.020 |
| CW_Arrow | 0.002 | 0.004 | 0.000 | 0.061 | 0.001 | 0.084 | 0.000 | 0.067 |
| Acountrydivas | 0.001 | 0.004 | 0.000 | 0.070 | 0.000 | 0.053 | 0.001 | 0.010 |
| RVAwonk | 0.000 | 0.004 | 0.000 | 0.087 | 0.000 | -0.002 | 0.000 | 0.082 |
| Ludacris | 0.000 | 0.004 | 0.000 | 0.025 | 0.000 | 0.033 | 0.000 | 0.057 |
| AaronRodgers12 | 0.007 | 0.004 | 0.000 | -0.067 | 0.000 | -0.061 | 0.000 | -0.033 |
| Kasparov63 | 0.000 | 0.004 | 0.000 | -0.024 | 0.000 | -0.037 | 0.000 | -0.022 |
| miakhalifa | 0.007 | 0.004 | 0.002 | -0.020 | 0.000 | -0.006 | 0.000 | -0.092 |
| msitweets | 0.000 | 0.004 | 0.000 | -0.008 | 0.000 | -0.012 | 0.000 | 0.068 |
| danielhowell | 0.005 | 0.004 | 0.000 | -0.002 | 0.000 | 0.025 | 0.000 | -0.022 |
| Louis_Tomlinson | 0.000 | 0.004 | 0.003 | 0.061 | 0.000 | 0.019 | 0.003 | 0.052 |
| thesimpleparent | 0.000 | 0.004 | 0.006 | 0.077 | 0.000 | 0.025 | 0.000 | -0.002 |
| GabbyGiffords | 0.000 | 0.004 | 0.005 | 0.079 | 0.000 | 0.025 | 0.001 | 0.043 |
| TMobile | 0.000 | 0.005 | 0.000 | 0.035 | 0.000 | -0.031 | 0.000 | -0.005 |
| pennjillette | 0.038 | 0.005 | 0.000 | 0.041 | 0.000 | 0.062 | 0.000 | 0.027 |
| MensHumor | 0.000 | 0.005 | 0.001 | 0.019 | 0.000 | 0.023 | 0.000 | 0.068 |
| MTV | 0.000 | 0.005 | 0.000 | 0.034 | 0.000 | 0.060 | 0.003 | 0.043 |
| Rosie | 0.000 | 0.005 | 0.000 | 0.040 | 0.000 | 0.060 | 0.000 | 0.005 |
| terrellowens | 0.000 | 0.005 | 0.000 | -0.020 | 0.000 | 0.004 | 0.005 | -0.003 |
| TSM_Leffen | 0.000 | 0.005 | 0.000 | -0.012 | 0.000 | 0.025 | 0.000 | 0.012 |
| BobRossGameDev | 0.000 | 0.005 | 0.000 | -0.010 | 0.000 | -0.011 | 0.000 | 0.012 |
| Macys | 0.000 | 0.005 | 0.000 | -0.010 | 0.000 | 0.004 | 0.000 | -0.022 |
| DCDeacon | 0.000 | 0.005 | 0.000 | -0.007 | 0.000 | -0.004 | 0.000 | 0.002 |
| Xpecial | 0.000 | 0.005 | 0.000 | -0.002 | 0.000 | 0.039 | 0.000 | -0.007 |
| WhoopiGoldberg | 0.000 | 0.005 | 0.007 | 0.034 | 0.000 | 0.039 | 0.000 | 0.026 |
| GreatestQuotes | 0.000 | 0.005 | 0.002 | 0.055 | 0.000 | 0.004 | 0.000 | 0.106 |
| CloudMom | 0.000 | 0.005 | 0.006 | 0.073 | 0.000 | 0.032 | 0.000 | 0.059 |
| cw_spn | 0.000 | 0.005 | 0.000 | 0.029 | 0.000 | 0.028 | 0.000 | 0.001 |
| bing | 0.000 | 0.005 | 0.000 | 0.034 | 0.000 | -0.019 | 0.000 | 0.055 |
| TweetDeck | 0.000 | 0.005 | 0.000 | 0.042 | 0.000 | -0.025 | 0.000 | 0.004 |
| thebeatles | 0.000 | 0.005 | 0.000 | 0.051 | 0.000 | 0.028 | 0.000 | 0.051 |
| AMD | 0.000 | 0.005 | 0.001 | -0.034 | 0.000 | -0.082 | 0.000 | 0.054 |
| xD1x | 0.000 | 0.006 | 0.007 | -0.063 | 0.000 | -0.032 | 0.000 | 0.035 |
| GamesRadar | 0.000 | 0.006 | 0.005 | -0.032 | 0.001 | -0.032 | 0.000 | 0.009 |
| HisAndHers | 0.000 | 0.006 | 0.000 | -0.025 | 0.000 | -0.052 | 0.000 | -0.048 |
| 30for30 | 0.000 | 0.006 | 0.000 | -0.022 | 0.000 | -0.012 | 0.001 | 0.004 |
| Broncos | 0.000 | 0.006 | 0.000 | -0.010 | 0.000 | -0.072 | 0.000 | -0.062 |
| swagcodespoiler | 0.001 | 0.006 | 0.000 | -0.005 | 0.001 | -0.005 | 0.007 | -0.035 |
| katiecouric | 0.001 | 0.006 | 0.000 | 0.004 | 0.000 | 0.002 | 0.000 | 0.022 |
| FBI | 0.002 | 0.006 | 0.000 | 0.016 | 0.000 | -0.005 | 0.000 | -0.031 |
| MonsterEnergy | 0.000 | 0.006 | 0.003 | 0.019 | 0.000 | 0.002 | 0.000 | 0.031 |
| HamiltonMusical | 0.004 | 0.006 | 0.027 | 0.021 | 0.000 | 0.028 | 0.000 | 0.018 |
| maryjblige | 0.000 | 0.006 | 0.000 | 0.045 | 0.000 | 0.008 | 0.001 | 0.044 |
| IGGYAZALEA | 0.000 | 0.006 | 0.000 | 0.047 | 0.000 | -0.025 | 0.000 | 0.022 |
| McConaughey | 0.000 | 0.006 | 0.003 | 0.047 | 0.000 | 0.048 | 0.000 | 0.009 |
| AllieBrosh | 0.000 | 0.006 | 0.000 | -0.011 | 0.001 | -0.053 | 0.000 | 0.010 |
| coffee_dad | 0.000 | 0.006 | 0.000 | 0.029 | 0.000 | 0.020 | 0.000 | -0.016 |
| Bungie | 0.000 | 0.006 | 0.001 | -0.011 | 0.000 | -0.050 | 0.000 | -0.012 |
| pepsi | 0.000 | 0.006 | 0.010 | 0.080 | 0.000 | 0.038 | 0.000 | 0.034 |
| E3 | 0.004 | 0.006 | 0.000 | -0.046 | 0.000 | -0.049 | 0.000 | -0.044 |
| DuleHill | 0.000 | 0.007 | 0.000 | 0.002 | 0.000 | 0.028 | 0.002 | -0.013 |
| dylanobrien | 0.002 | 0.007 | 0.000 | 0.044 | 0.000 | -0.025 | 0.001 | 0.036 |
| KellyOsbourne | 0.000 | 0.007 | 0.005 | 0.050 | 0.000 | 0.044 | 0.000 | 0.033 |
| ChickfilA | 0.000 | 0.007 | 0.000 | -0.008 | 0.001 | -0.019 | 0.000 | -0.018 |
| luke_lafr | 0.006 | 0.007 | 0.000 | 0.001 | 0.000 | 0.019 | 0.000 | 0.019 |
| NWS | 0.000 | 0.007 | 0.000 | 0.003 | 0.000 | -0.031 | 0.000 | -0.014 |
| NevSchulman | 0.000 | 0.007 | 0.001 | 0.034 | 0.000 | 0.019 | 0.000 | 0.031 |
| MileyCyrus | 0.000 | 0.007 | 0.014 | 0.034 | 0.000 | 0.022 | 0.000 | 0.034 |
| progducto | 0.000 | 0.007 | 0.000 | -0.066 | 0.000 | -0.010 | 0.000 | 0.046 |
| TheGoodGodAbove | 0.011 | 0.007 | 0.000 | -0.041 | 0.000 | -0.018 | 0.000 | -0.042 |
| shutupmikeginn | 0.000 | 0.007 | 0.000 | -0.032 | 0.001 | -0.018 | 0.000 | -0.027 |
| StarTrek | 0.000 | 0.007 | 0.000 | -0.024 | 0.000 | -0.018 | 0.000 | 0.015 |
| DickieV | 0.002 | 0.007 | 0.000 | -0.018 | 0.001 | -0.018 | 0.000 | -0.006 |
| torikelly | 0.000 | 0.007 | 0.000 | -0.015 | 0.000 | -0.041 | 0.000 | 0.004 |
| TmarTn | 0.000 | 0.007 | 0.001 | -0.012 | 0.000 | -0.026 | 0.000 | -0.022 |
| bertkreischer | 0.000 | 0.007 | 0.000 | -0.012 | 0.000 | 0.045 | 0.000 | -0.011 |
| TiaMowry | 0.000 | 0.007 | 0.000 | -0.007 | 0.000 | 0.014 | 0.000 | 0.020 |
| rogbennett | 0.000 | 0.007 | 0.000 | 0.010 | 0.000 | 0.069 | 0.000 | 0.004 |
| adidasalerts | 0.000 | 0.007 | 0.000 | 0.016 | 0.000 | -0.033 | 0.000 | 0.010 |
| blocktogether | 0.000 | 0.007 | 0.000 | 0.022 | 0.000 | 0.006 | 0.000 | 0.046 |
| JerkyXP | 0.000 | 0.007 | 0.004 | 0.027 | 0.000 | -0.018 | 0.000 | -0.042 |
| GustavoSBR | 0.000 | 0.007 | 0.004 | 0.030 | 0.000 | 0.014 | 0.000 | 0.004 |
| GVteam | 0.000 | 0.007 | 0.007 | 0.030 | 0.000 | 0.045 | 0.000 | 0.041 |
| theguild | 0.000 | 0.007 | 0.000 | 0.042 | 0.000 | 0.069 | 0.000 | 0.010 |
| TerryGilliam | 0.000 | 0.007 | 0.006 | 0.050 | 0.000 | 0.053 | 0.001 | -0.006 |
| punchtab | 0.001 | 0.007 | 0.000 | 0.059 | 0.000 | 0.045 | 0.000 | 0.025 |
| autocorrects | 0.000 | 0.007 | 0.000 | 0.061 | 0.000 | 0.022 | 0.000 | 0.072 |
| justfreestuff | 0.000 | 0.007 | 0.000 | 0.067 | 0.000 | 0.053 | 0.000 | 0.046 |
| LennyKravitz | 0.000 | 0.007 | 0.000 | 0.070 | 0.002 | 0.061 | 0.000 | 0.087 |
| theblackkeys | 0.000 | 0.007 | 0.000 | 0.081 | 0.000 | 0.029 | 0.000 | 0.020 |
| SHAQ | 0.000 | 0.007 | 0.000 | 0.007 | 0.000 | -0.024 | 0.003 | 0.032 |
| Spotify | 0.000 | 0.007 | 0.001 | 0.038 | 0.000 | 0.026 | 0.000 | 0.033 |
| darrenrovell | 0.000 | 0.007 | 0.000 | 0.017 | 0.000 | 0.010 | 0.000 | 0.005 |
| MarcJSpearsESPN | 0.000 | 0.007 | 0.000 | -0.011 | 0.000 | -0.096 | 0.000 | -0.062 |
| ASUS_ROG | 0.016 | 0.007 | 0.000 | -0.011 | 0.000 | -0.025 | 0.000 | 0.016 |
| DavidVonderhaar | 0.001 | 0.007 | 0.000 | 0.004 | 0.000 | -0.031 | 0.000 | -0.023 |
| bluthquotes | 0.000 | 0.007 | 0.002 | 0.029 | 0.000 | -0.007 | 0.000 | 0.059 |
| paulkrugman | 0.000 | 0.007 | 0.001 | 0.059 | 0.000 | 0.046 | 0.000 | 0.055 |
| KinguinNet | 0.000 | 0.008 | 0.000 | -0.036 | 0.000 | -0.075 | 0.000 | -0.031 |
| RZA | 0.000 | 0.008 | 0.000 | -0.031 | 0.000 | -0.047 | 0.000 | 0.030 |
| SamsungMobile | 0.001 | 0.008 | 0.000 | -0.002 | 0.000 | -0.004 | 0.000 | -0.017 |
| TimothyDeLaG | 0.001 | 0.008 | 0.000 | 0.001 | 0.000 | 0.047 | 0.000 | 0.040 |
| Giancarlo818 | 0.000 | 0.008 | 0.000 | 0.013 | 0.000 | 0.011 | 0.000 | 0.026 |
| romero | 0.000 | 0.008 | 0.000 | 0.021 | 0.000 | 0.039 | 0.000 | -0.007 |
| Professorbroman | 0.000 | 0.008 | 0.003 | 0.024 | 0.000 | -0.047 | 0.000 | 0.002 |
| LosFelizDaycare | 0.001 | 0.008 | 0.000 | 0.029 | 0.000 | -0.004 | 0.000 | 0.021 |
| EmilyBett | 0.000 | 0.008 | 0.000 | 0.045 | 0.000 | 0.083 | 0.000 | 0.054 |
| humansofny | 0.006 | 0.008 | 0.011 | 0.050 | 0.000 | 0.011 | 0.005 | 0.064 |
| FFXVEN | 0.000 | 0.008 | 0.000 | 0.052 | 0.000 | 0.061 | 0.000 | 0.002 |
| CeeLoGreen | 0.000 | 0.008 | 0.000 | 0.055 | 0.000 | 0.025 | 0.000 | 0.054 |
| AdamSerwer | 0.000 | 0.008 | 0.000 | 0.068 | 0.000 | 0.011 | 0.007 | 0.078 |
| MCHammer | 0.001 | 0.008 | 0.000 | 0.068 | 0.000 | 0.075 | 0.000 | 0.030 |
| slickdeals | 0.002 | 0.008 | 0.005 | 0.041 | 0.002 | 0.022 | 0.000 | 0.015 |
| Nick_Offerman | 0.000 | 0.008 | 0.000 | 0.061 | 0.002 | 0.064 | 0.000 | 0.046 |
| chadfordinsider | 0.000 | 0.008 | 0.000 | -0.003 | 0.000 | -0.045 | 0.009 | -0.026 |
| gracehelbig | 0.000 | 0.008 | 0.000 | 0.009 | 0.000 | -0.018 | 0.000 | -0.018 |
| DisneyAnimation | 0.000 | 0.008 | 0.001 | -0.046 | 0.000 | -0.058 | 0.000 | -0.031 |
| nordcurrent | 0.000 | 0.008 | 0.000 | 0.016 | 0.000 | -0.018 | 0.000 | 0.018 |
| PBS | 0.000 | 0.008 | 0.000 | 0.023 | 0.000 | -0.012 | 0.000 | -0.009 |
| cwgabriel | 0.000 | 0.008 | 0.000 | 0.071 | 0.000 | 0.048 | 0.000 | 0.079 |
| StephenAtHome | 0.000 | 0.008 | 0.000 | 0.024 | 0.000 | 0.044 | 0.000 | 0.048 |
| lifehacker | 0.000 | 0.008 | 0.000 | -0.022 | 0.000 | -0.076 | 0.000 | 0.030 |
| mindykaling | 0.002 | 0.008 | 0.008 | 0.029 | 0.000 | -0.006 | 0.000 | -0.021 |
| Pharrell | 0.001 | 0.009 | 0.000 | 0.067 | 0.000 | 0.060 | 0.000 | 0.075 |
| nytimes | 0.000 | 0.009 | 0.000 | 0.041 | 0.001 | -0.006 | 0.002 | 0.024 |
| LiquidHbox | 0.001 | 0.009 | 0.000 | -0.062 | 0.000 | -0.025 | 0.000 | 0.031 |
| ClayMatthews52 | 0.000 | 0.009 | 0.002 | -0.013 | 0.000 | -0.031 | 0.000 | 0.023 |
| TrueFactsStated | 0.000 | 0.009 | 0.003 | 0.007 | 0.000 | -0.037 | 0.000 | 0.035 |
| TheAcademy | 0.000 | 0.009 | 0.013 | 0.007 | 0.000 | -0.050 | 0.000 | -0.022 |
| JessicaChobot | 0.000 | 0.009 | 0.000 | 0.016 | 0.000 | -0.019 | 0.000 | 0.011 |
| chrisbrown | 0.000 | 0.009 | 0.000 | 0.021 | 0.000 | 0.000 | 0.000 | 0.093 |
| AskPlayStation | 0.000 | 0.009 | 0.000 | 0.025 | 0.000 | -0.037 | 0.000 | 0.072 |
| TODAYshow | 0.000 | 0.009 | 0.000 | 0.041 | 0.000 | 0.012 | 0.000 | 0.031 |
| SethAbramson | 0.000 | 0.009 | 0.004 | 0.033 | 0.000 | -0.036 | 0.000 | -0.041 |
| RobRiggle | 0.000 | 0.009 | 0.000 | -0.032 | 0.000 | -0.031 | 0.000 | -0.015 |
| Raekwon | 0.001 | 0.009 | 0.000 | 0.002 | 0.000 | -0.013 | 0.000 | 0.043 |
| xtina | 0.000 | 0.009 | 0.000 | 0.068 | 0.000 | 0.034 | 0.000 | 0.047 |
| NianticLabs | 0.000 | 0.010 | 0.002 | -0.048 | 0.000 | -0.011 | 0.003 | -0.005 |
| JayzTwoCents | 0.001 | 0.010 | 0.000 | -0.043 | 0.000 | -0.090 | 0.000 | -0.015 |
| petermckinnon | 0.000 | 0.010 | 0.001 | -0.058 | 0.000 | -0.057 | 0.000 | -0.053 |
| AesopRockWins | 0.000 | 0.010 | 0.000 | -0.035 | 0.000 | 0.022 | 0.000 | 0.020 |
| GolfChannel | 0.000 | 0.010 | 0.000 | -0.026 | 0.000 | -0.104 | 0.000 | -0.068 |
| PeanutButterGmr | 0.036 | 0.010 | 0.004 | -0.024 | 0.000 | -0.049 | 0.000 | 0.046 |
| XboxAmbassadors | 0.000 | 0.010 | 0.000 | -0.007 | 0.000 | -0.002 | 0.000 | 0.025 |
| Smiley360 | 0.000 | 0.010 | 0.000 | -0.007 | 0.000 | -0.002 | 0.000 | -0.042 |
| WearOSbyGoogle | 0.005 | 0.010 | 0.000 | -0.004 | 0.001 | -0.002 | 0.000 | 0.004 |
| TenergyOfficial | 0.000 | 0.010 | 0.000 | 0.002 | 0.000 | 0.037 | 0.000 | 0.030 |
| Caradelevingne | 0.001 | 0.010 | 0.002 | 0.008 | 0.000 | 0.053 | 0.000 | 0.041 |
| MattMira | 0.000 | 0.010 | 0.000 | 0.025 | 0.000 | 0.014 | 0.000 | 0.025 |
| MarleeMatlin | 0.000 | 0.010 | 0.000 | 0.027 | 0.000 | 0.061 | 0.000 | -0.011 |
| shinobi602 | 0.008 | 0.010 | 0.000 | 0.030 | 0.000 | -0.033 | 0.000 | -0.006 |
| PeripheryBand | 0.020 | 0.010 | 0.000 | 0.030 | 0.000 | -0.002 | 0.003 | 0.062 |
| JahovasWitniss | 0.000 | 0.010 | 0.000 | 0.030 | 0.000 | -0.002 | 0.000 | -0.037 |
| davidfrum | 0.000 | 0.010 | 0.000 | 0.033 | 0.000 | -0.010 | 0.000 | 0.051 |
| FinancialTimes | 0.000 | 0.010 | 0.003 | 0.033 | 0.000 | 0.006 | 0.000 | 0.020 |
| mariabamfoo | 0.003 | 0.010 | 0.000 | 0.036 | 0.000 | -0.002 | 0.000 | -0.022 |
| lambofgod | 0.000 | 0.010 | 0.002 | 0.039 | 0.000 | 0.014 | 0.011 | 0.087 |
| CW_TheFlash | 0.000 | 0.010 | 0.000 | 0.044 | 0.002 | 0.061 | 0.000 | 0.062 |
| ClassicPict | 0.000 | 0.010 | 0.002 | 0.059 | 0.000 | 0.022 | 0.001 | 0.082 |
| BriannaWu | 0.000 | 0.010 | 0.000 | 0.059 | 0.000 | 0.053 | 0.000 | -0.006 |
| iamwandasykes | 0.000 | 0.010 | 0.000 | 0.121 | 0.004 | 0.116 | 0.000 | 0.093 |
| C9Mang0 | 0.004 | 0.010 | 0.000 | -0.032 | 0.000 | 0.014 | 0.000 | 0.021 |
| GavinFree | 0.000 | 0.010 | 0.000 | -0.049 | 0.000 | 0.002 | 0.000 | 0.031 |
| oliviamunn | 0.001 | 0.010 | 0.003 | 0.037 | 0.000 | 0.017 | 0.003 | 0.041 |
| tarik | 0.001 | 0.010 | 0.000 | -0.023 | 0.000 | -0.011 | 0.000 | -0.003 |
| Renner4Real | 0.000 | 0.010 | 0.000 | -0.007 | 0.000 | 0.025 | 0.000 | -0.022 |
| JackEtienne | 0.000 | 0.010 | 0.000 | 0.013 | 0.000 | 0.032 | 0.000 | -0.007 |
| KegsnEggs | 0.001 | 0.010 | 0.000 | 0.021 | 0.000 | 0.039 | 0.000 | 0.073 |
| DanaiGurira | 0.000 | 0.010 | 0.000 | 0.024 | 0.000 | 0.004 | 0.000 | 0.049 |
| HiddenCash | 0.000 | 0.010 | 0.001 | 0.026 | 0.000 | 0.047 | 0.000 | 0.007 |
| theMoneyMatches | 0.000 | 0.010 | 0.001 | 0.029 | 0.000 | -0.011 | 0.004 | 0.040 |
| MCRofficial | 0.000 | 0.010 | 0.000 | 0.039 | 0.000 | 0.054 | 0.000 | 0.021 |
| WelchsFruitSnck | 0.000 | 0.010 | 0.004 | 0.063 | 0.000 | 0.032 | 0.000 | 0.021 |
| Giveaway_Town | 0.001 | 0.010 | 0.009 | 0.065 | 0.000 | 0.061 | 0.000 | 0.035 |
| EnzasBargains | 0.004 | 0.010 | 0.001 | 0.065 | 0.000 | 0.075 | 0.000 | 0.021 |
| tedleo | 0.007 | 0.010 | 0.000 | 0.073 | 0.000 | 0.054 | 0.001 | 0.030 |
| Jenna_Marbles | 0.009 | 0.010 | 0.001 | 0.036 | 0.000 | 0.026 | 0.000 | 0.021 |
| CraigyFerg | 0.000 | 0.010 | 0.000 | 0.012 | 0.000 | 0.011 | 0.000 | 0.020 |
| iBUYPOWER | 0.000 | 0.010 | 0.000 | 0.007 | 0.000 | -0.068 | 0.000 | 0.047 |
| tonyhawk | 0.000 | 0.010 | 0.000 | 0.084 | 0.000 | 0.081 | 0.000 | 0.078 |
| TheEllenShow | 0.000 | 0.011 | 0.000 | 0.068 | 0.000 | 0.041 | 0.000 | 0.016 |
| carrieffisher | 0.001 | 0.011 | 0.003 | 0.025 | 0.000 | 0.010 | 0.000 | -0.004 |
| GoogleAI | 0.000 | 0.011 | 0.000 | -0.022 | 0.000 | -0.065 | 0.000 | -0.009 |
| DashieXP | 0.000 | 0.011 | 0.000 | 0.009 | 0.002 | 0.015 | 0.000 | -0.013 |
| Panthers | 0.000 | 0.011 | 0.000 | 0.009 | 0.000 | 0.035 | 0.000 | -0.004 |
| YNB | 0.000 | 0.011 | 0.000 | 0.031 | 0.000 | 0.055 | 0.000 | 0.031 |
| thestrokes | 0.000 | 0.011 | 0.000 | 0.035 | 0.000 | 0.035 | 0.000 | 0.000 |
| GDeLaurentiis | 0.000 | 0.011 | 0.000 | 0.057 | 0.000 | 0.042 | 0.001 | 0.057 |
| NickCannon | 0.000 | 0.011 | 0.000 | 0.062 | 0.000 | 0.048 | 0.000 | 0.070 |
| tyrabanks | 0.000 | 0.011 | 0.000 | 0.086 | 0.000 | 0.042 | 0.000 | 0.083 |
| Logic301 | 0.012 | 0.011 | 0.000 | 0.052 | 0.000 | -0.040 | 0.000 | 0.070 |
| Etsy | 0.000 | 0.011 | 0.002 | 0.023 | 0.000 | 0.051 | 0.000 | -0.038 |
| StephenAmell | 0.002 | 0.011 | 0.004 | 0.027 | 0.000 | 0.072 | 0.000 | 0.064 |
| ChipotleTweets | 0.000 | 0.011 | 0.000 | 0.046 | 0.001 | -0.022 | 0.000 | 0.027 |
| cnni | 0.000 | 0.011 | 0.000 | -0.006 | 0.000 | 0.037 | 0.001 | 0.027 |
| ThisAmerLife | 0.000 | 0.011 | 0.001 | 0.021 | 0.000 | -0.012 | 0.000 | -0.002 |
| TheCooksCook | 0.000 | 0.011 | 0.004 | 0.025 | 0.000 | 0.050 | 0.000 | -0.031 |
| NBCOlympics | 0.000 | 0.011 | 0.000 | 0.039 | 0.000 | 0.000 | 0.000 | 0.039 |
| DavidCornDC | 0.011 | 0.011 | 0.000 | 0.068 | 0.000 | 0.012 | 0.000 | 0.043 |
| chrissyteigen | 0.001 | 0.011 | 0.000 | 0.033 | 0.000 | 0.012 | 0.000 | 0.027 |
| jordanbpeterson | 0.000 | 0.011 | 0.000 | -0.011 | 0.000 | 0.018 | 0.000 | -0.008 |
| FatKidDeals | 0.000 | 0.011 | 0.000 | 0.042 | 0.000 | 0.038 | 0.000 | -0.047 |
| AndroidAuth | 0.000 | 0.011 | 0.000 | 0.076 | 0.000 | 0.033 | 0.000 | 0.057 |
| evleaks | 0.000 | 0.012 | 0.005 | -0.056 | 0.000 | -0.107 | 0.002 | -0.027 |
| OriginInsider | 0.000 | 0.012 | 0.000 | -0.032 | 0.000 | -0.049 | 0.000 | -0.054 |
| JamesRoday | 0.000 | 0.012 | 0.002 | -0.007 | 0.001 | 0.034 | 0.000 | 0.016 |
| aishatyler | 0.000 | 0.012 | 0.000 | 0.008 | 0.000 | 0.081 | 0.001 | 0.036 |
| pizzahut | 0.000 | 0.012 | 0.000 | 0.014 | 0.000 | -0.013 | 0.000 | 0.024 |
| Trump_Regrets | 0.000 | 0.012 | 0.000 | 0.025 | 0.000 | 0.016 | 0.000 | 0.039 |
| MattBellassai | 0.000 | 0.012 | 0.000 | 0.031 | 0.000 | -0.031 | 0.000 | -0.003 |
| AndrewWK | 0.018 | 0.012 | 0.000 | 0.038 | 0.000 | -0.007 | 0.000 | 0.078 |
| BlizzardCS | 0.000 | 0.012 | 0.000 | 0.040 | 0.000 | 0.021 | 0.011 | 0.003 |
| RocketLeague | 0.000 | 0.012 | 0.000 | -0.026 | 0.001 | -0.047 | 0.000 | 0.040 |
| PTI | 0.000 | 0.012 | 0.000 | -0.015 | 0.000 | 0.036 | 0.000 | 0.006 |
| Nas | 0.000 | 0.012 | 0.003 | -0.007 | 0.000 | -0.020 | 0.000 | 0.054 |
| kevinrose | 0.000 | 0.012 | 0.019 | 0.019 | 0.000 | 0.008 | 0.000 | 0.040 |
| mlbtraderumors | 0.000 | 0.012 | 0.015 | -0.031 | 0.000 | -0.025 | 0.000 | 0.001 |
| id_824264707641057281 | 0.000 | 0.012 | 0.000 | 0.073 | 0.000 | 0.001 | 0.005 | 0.057 |
| BeckyLynchWWE | 0.019 | 0.013 | 0.000 | -0.052 | 0.000 | -0.057 | 0.003 | -0.073 |
| awfulannouncing | 0.000 | 0.013 | 0.000 | -0.032 | 0.000 | -0.018 | 0.000 | 0.030 |
| crookedmedia | 0.000 | 0.013 | 0.006 | -0.026 | 0.000 | -0.049 | 0.000 | 0.025 |
| CryWasTaken | 0.000 | 0.013 | 0.000 | -0.026 | 0.001 | 0.053 | 0.000 | -0.006 |
| tavitulle | 0.001 | 0.013 | 0.000 | -0.001 | 0.000 | -0.002 | 0.000 | -0.022 |
| brandnewrock | 0.000 | 0.013 | 0.000 | -0.001 | 0.000 | 0.053 | 0.000 | 0.030 |
| nikesportswear | 0.000 | 0.013 | 0.000 | 0.008 | 0.000 | -0.033 | 0.000 | -0.006 |
| Vertagear | 0.000 | 0.013 | 0.001 | 0.008 | 0.000 | -0.026 | 0.000 | -0.047 |
| riteaid | 0.000 | 0.013 | 0.000 | 0.010 | 0.000 | 0.014 | 0.000 | 0.041 |
| caitylotz | 0.007 | 0.013 | 0.000 | 0.013 | 0.000 | 0.022 | 0.000 | 0.067 |
| Norwallmusic | 0.000 | 0.013 | 0.001 | 0.016 | 0.000 | 0.006 | 0.000 | 0.020 |
| AGT | 0.004 | 0.013 | 0.003 | 0.039 | 0.000 | -0.026 | 0.000 | 0.036 |
| TalibKweli | 0.000 | 0.013 | 0.004 | 0.042 | 0.000 | 0.022 | 0.000 | 0.030 |
| Ayaan | 0.006 | 0.013 | 0.000 | 0.044 | 0.000 | 0.077 | 0.000 | -0.011 |
| mountain_goats | 0.000 | 0.013 | 0.000 | 0.053 | 0.000 | -0.002 | 0.000 | -0.058 |
| thatgamecompany | 0.000 | 0.013 | 0.000 | 0.061 | 0.000 | 0.006 | 0.000 | 0.025 |
| dvntownsend | 0.000 | 0.013 | 0.003 | 0.078 | 0.001 | 0.069 | 0.004 | 0.103 |
| neiltyson | 0.000 | 0.013 | 0.036 | -0.002 | 0.000 | 0.012 | 0.000 | -0.007 |
| GeT_RiGhT | 0.000 | 0.013 | 0.000 | -0.002 | 0.000 | -0.025 | 0.000 | 0.007 |
| riotgames | 0.000 | 0.013 | 0.000 | 0.008 | 0.000 | 0.061 | 0.000 | 0.040 |
| csgo_dev | 0.000 | 0.013 | 0.000 | 0.013 | 0.000 | -0.004 | 0.000 | 0.016 |
| DegicaGames | 0.002 | 0.013 | 0.000 | 0.019 | 0.000 | -0.039 | 0.000 | 0.035 |
| Fandango | 0.000 | 0.013 | 0.015 | 0.026 | 0.000 | -0.004 | 0.000 | 0.012 |
| CouRageJD | 0.000 | 0.013 | 0.000 | 0.039 | 0.000 | -0.032 | 0.000 | -0.012 |
| fightfortheftr | 0.000 | 0.013 | 0.000 | 0.055 | 0.000 | 0.039 | 0.000 | 0.078 |
| amnestyusa | 0.000 | 0.013 | 0.000 | 0.065 | 0.000 | 0.068 | 0.001 | 0.021 |
| RondaRousey | 0.000 | 0.013 | 0.000 | 0.000 | 0.000 | 0.008 | 0.000 | -0.018 |
| RealJamesWoods | 0.000 | 0.013 | 0.000 | -0.020 | 0.000 | 0.002 | 0.000 | -0.044 |
| insomniacgames | 0.000 | 0.013 | 0.000 | -0.013 | 0.000 | 0.015 | 0.000 | -0.009 |
| gameloft | 0.000 | 0.013 | 0.000 | 0.009 | 0.000 | -0.025 | 0.000 | 0.004 |
| hwinkler4real | 0.000 | 0.013 | 0.000 | 0.016 | 0.000 | 0.042 | 0.000 | 0.004 |
| drdrew | 0.003 | 0.013 | 0.000 | 0.069 | 0.000 | 0.095 | 0.000 | 0.053 |
| therealelp | 0.000 | 0.013 | 0.000 | -0.011 | 0.000 | -0.016 | 0.001 | -0.002 |
| blakegriffin23 | 0.001 | 0.013 | 0.002 | 0.021 | 0.000 | -0.070 | 0.001 | 0.031 |
| PFTompkins | 0.000 | 0.013 | 0.004 | 0.028 | 0.000 | 0.043 | 0.000 | 0.008 |
| aliciakeys | 0.000 | 0.013 | 0.000 | 0.044 | 0.001 | 0.033 | 0.010 | 0.073 |
| rihanna | 0.000 | 0.013 | 0.000 | 0.040 | 0.000 | 0.017 | 0.000 | 0.021 |
| galifianakisz | 0.005 | 0.013 | 0.012 | 0.028 | 0.000 | 0.017 | 0.009 | 0.064 |
| gamasutra | 0.005 | 0.013 | 0.000 | 0.007 | 0.000 | 0.019 | 0.000 | -0.014 |
| wolfpupy | 0.005 | 0.013 | 0.003 | 0.021 | 0.000 | 0.019 | 0.000 | 0.023 |
| SenGillibrand | 0.000 | 0.013 | 0.005 | 0.086 | 0.000 | 0.012 | 0.000 | 0.052 |
| shaunking | 0.000 | 0.014 | 0.000 | 0.030 | 0.000 | 0.017 | 0.000 | 0.038 |
| Eminem | 0.000 | 0.014 | 0.007 | 0.055 | 0.000 | 0.044 | 0.000 | 0.065 |
| NASA | 0.002 | 0.014 | 0.000 | 0.022 | 0.000 | 0.031 | 0.000 | -0.001 |
| johnrampton | 0.012 | 0.014 | 0.000 | 0.019 | 0.001 | 0.099 | 0.000 | 0.039 |
| serial | 0.000 | 0.014 | 0.000 | 0.042 | 0.000 | 0.004 | 0.000 | 0.039 |
| DealsPlus | 0.004 | 0.014 | 0.000 | 0.055 | 0.000 | 0.022 | 0.000 | 0.001 |
| chancetherapper | 0.000 | 0.014 | 0.002 | -0.004 | 0.000 | -0.021 | 0.000 | -0.016 |
| taylorswift13 | 0.000 | 0.014 | 0.000 | 0.055 | 0.001 | 0.033 | 0.000 | 0.055 |
| IMDb | 0.001 | 0.014 | 0.000 | 0.023 | 0.000 | 0.001 | 0.000 | 0.002 |
| AgentsofSHIELD | 0.000 | 0.014 | 0.002 | -0.019 | 0.000 | 0.008 | 0.000 | 0.021 |
| JayBilas | 0.004 | 0.014 | 0.001 | 0.003 | 0.000 | -0.020 | 0.000 | 0.006 |
| FakeAPStylebook | 0.001 | 0.014 | 0.000 | 0.038 | 0.000 | 0.023 | 0.000 | -0.003 |
| JJWatt | 0.004 | 0.015 | 0.000 | -0.029 | 0.000 | -0.020 | 0.008 | 0.030 |
| ChrisWarcraft | 0.000 | 0.015 | 0.012 | 0.080 | 0.000 | 0.056 | 0.000 | 0.027 |
| Staples | 0.000 | 0.015 | 0.000 | 0.087 | 0.000 | -0.005 | 0.000 | 0.067 |
| intel | 0.007 | 0.015 | 0.000 | 0.019 | 0.000 | -0.014 | 0.000 | 0.048 |
| billburr | 0.000 | 0.015 | 0.000 | -0.003 | 0.000 | 0.021 | 0.000 | 0.038 |
| JeremyClarkson | 0.000 | 0.015 | 0.001 | 0.025 | 0.000 | 0.078 | 0.000 | 0.053 |
| gmail | 0.005 | 0.015 | 0.012 | 0.033 | 0.000 | -0.036 | 0.000 | 0.032 |
| mradamscott | 0.000 | 0.015 | 0.000 | 0.007 | 0.001 | -0.027 | 0.005 | -0.043 |
| DisneyParks | 0.000 | 0.015 | 0.003 | -0.023 | 0.000 | -0.025 | 0.000 | -0.031 |
| MikeJudge | 0.000 | 0.015 | 0.000 | -0.012 | 0.000 | -0.011 | 0.000 | -0.003 |
| Andy | 0.003 | 0.015 | 0.000 | 0.016 | 0.000 | 0.018 | 0.000 | 0.007 |
| parksandrecnbc | 0.000 | 0.015 | 0.000 | 0.019 | 0.000 | 0.011 | 0.000 | -0.007 |
| Grubhub | 0.007 | 0.015 | 0.004 | 0.021 | 0.000 | 0.032 | 0.000 | -0.026 |
| opera | 0.003 | 0.015 | 0.000 | 0.050 | 0.000 | -0.011 | 0.000 | 0.092 |
| JohnBarrowman | 0.004 | 0.015 | 0.000 | 0.050 | 0.000 | 0.054 | 0.000 | 0.016 |
| HarryPotterFilm | 0.000 | 0.015 | 0.000 | 0.060 | 0.000 | 0.047 | 0.000 | 0.016 |
| KattPackAllDay | 0.000 | 0.015 | 0.000 | -0.025 | 0.000 | -0.005 | 0.000 | 0.013 |
| Iron_Man | 0.002 | 0.015 | 0.000 | -0.022 | 0.000 | -0.012 | 0.000 | 0.013 |
| EliasSports | 0.001 | 0.015 | 0.001 | -0.013 | 0.000 | 0.008 | 0.000 | 0.004 |
| MagicRealismBot | 0.000 | 0.015 | 0.000 | -0.008 | 0.000 | -0.038 | 0.000 | -0.075 |
| ObamaFoundation | 0.000 | 0.015 | 0.000 | 0.021 | 0.000 | 0.008 | 0.000 | 0.048 |
| idSoftware | 0.002 | 0.015 | 0.000 | 0.021 | 0.000 | 0.008 | 0.000 | -0.018 |
| Lavernecox | 0.000 | 0.015 | 0.000 | 0.043 | 0.000 | 0.075 | 0.000 | 0.009 |
| bbcdoctorwho | 0.000 | 0.015 | 0.001 | 0.050 | 0.000 | 0.068 | 0.001 | 0.009 |
| kenbone18 | 0.000 | 0.015 | 0.005 | 0.064 | 0.000 | 0.022 | 0.000 | 0.009 |
| Pampers | 0.000 | 0.015 | 0.000 | 0.093 | 0.000 | 0.042 | 0.000 | 0.000 |
| JeremyNDooley | 0.009 | 0.015 | 0.000 | -0.041 | 0.000 | 0.022 | 0.000 | -0.022 |
| differlanguages | 0.000 | 0.015 | 0.005 | -0.032 | 0.000 | -0.049 | 0.000 | -0.027 |
| NobleGG | 0.000 | 0.015 | 0.000 | -0.024 | 0.000 | -0.065 | 0.002 | -0.022 |
| UrijahFaber | 0.003 | 0.015 | 0.000 | -0.024 | 0.000 | 0.029 | 0.000 | -0.042 |
| VeryShortStory | 0.000 | 0.015 | 0.000 | -0.021 | 0.000 | -0.065 | 0.000 | -0.099 |
| evad3rs | 0.001 | 0.015 | 0.005 | -0.012 | 0.000 | -0.041 | 0.000 | -0.006 |
| Forsen | 0.002 | 0.015 | 0.000 | -0.004 | 0.000 | 0.029 | 0.000 | -0.027 |
| dogboner | 0.000 | 0.015 | 0.000 | 0.002 | 0.000 | -0.057 | 0.000 | -0.001 |
| ConsiderMeDead | 0.000 | 0.015 | 0.000 | 0.005 | 0.002 | 0.053 | 0.000 | 0.041 |
| bryancallen | 0.000 | 0.015 | 0.002 | 0.005 | 0.000 | 0.022 | 0.000 | 0.010 |
| aantonop | 0.004 | 0.015 | 0.000 | 0.005 | 0.000 | 0.022 | 0.000 | 0.020 |
| Bashiok | 0.000 | 0.015 | 0.002 | 0.016 | 0.000 | 0.029 | 0.000 | 0.010 |
| mattyglesias | 0.000 | 0.015 | 0.000 | 0.030 | 0.000 | 0.006 | 0.000 | 0.072 |
| realadvicegal | 0.000 | 0.015 | 0.000 | 0.033 | 0.000 | 0.014 | 0.000 | -0.016 |
| smithsonian | 0.000 | 0.015 | 0.000 | 0.036 | 0.000 | 0.053 | 0.000 | -0.027 |
| BLABBERMOUTHNET | 0.000 | 0.015 | 0.000 | 0.044 | 0.000 | 0.045 | 0.000 | 0.056 |
| Metallica | 0.000 | 0.015 | 0.000 | 0.047 | 0.000 | 0.029 | 0.000 | 0.036 |
| Lupita_Nyongo | 0.000 | 0.015 | 0.000 | 0.056 | 0.000 | -0.026 | 0.000 | 0.062 |
| PuritansPride | 0.000 | 0.015 | 0.000 | 0.059 | 0.000 | -0.002 | 0.000 | 0.036 |
| TheBloggess | 0.000 | 0.015 | 0.000 | 0.064 | 0.000 | 0.069 | 0.000 | 0.046 |
| TheKnowledge | 0.001 | 0.015 | 0.000 | 0.067 | 0.000 | 0.053 | 0.000 | 0.072 |
| McKaylaMaroney | 0.000 | 0.016 | 0.000 | 0.001 | 0.000 | -0.044 | 0.000 | -0.035 |
| Espngreeny | 0.001 | 0.016 | 0.000 | 0.016 | 0.000 | 0.037 | 0.000 | -0.014 |
| FastCompany | 0.000 | 0.016 | 0.000 | 0.037 | 0.000 | -0.031 | 0.000 | 0.052 |
| MotherJones | 0.000 | 0.016 | 0.002 | 0.043 | 0.000 | 0.044 | 0.002 | 0.035 |
| ahelicoptermom | 0.000 | 0.016 | 0.000 | 0.070 | 0.000 | 0.075 | 0.000 | 0.011 |
| kfc | 0.000 | 0.016 | 0.006 | -0.020 | 0.000 | -0.037 | 0.001 | -0.011 |
| DPRK_News | 0.002 | 0.016 | 0.000 | -0.015 | 0.000 | 0.010 | 0.000 | -0.007 |
| Akademiks | 0.000 | 0.016 | 0.006 | -0.003 | 0.000 | 0.075 | 0.000 | -0.003 |
| kellyoxford | 0.007 | 0.016 | 0.000 | 0.006 | 0.000 | 0.022 | 0.003 | -0.023 |
| Alt_NASA | 0.000 | 0.016 | 0.000 | 0.051 | 0.000 | 0.004 | 0.000 | 0.055 |
| WestworldHBO | 0.004 | 0.016 | 0.029 | 0.057 | 0.000 | 0.028 | 0.000 | 0.032 |
| ilazer | 0.000 | 0.016 | 0.000 | 0.009 | 0.000 | -0.070 | 0.000 | -0.005 |
| ORIGINPC | 0.000 | 0.016 | 0.004 | -0.010 | 0.000 | -0.052 | 0.000 | 0.039 |
| TheRock | 0.009 | 0.016 | 0.000 | 0.013 | 0.000 | 0.024 | 0.000 | 0.004 |
| GameGrumps | 0.000 | 0.016 | 0.000 | -0.008 | 0.000 | 0.017 | 0.000 | 0.022 |
| lildickytweets | 0.000 | 0.016 | 0.000 | -0.032 | 0.000 | -0.010 | 0.000 | -0.031 |
| DwightHoward | 0.001 | 0.016 | 0.000 | 0.012 | 0.004 | -0.020 | 0.000 | 0.023 |
| JonahHill | 0.000 | 0.017 | 0.000 | 0.047 | 0.000 | -0.003 | 0.000 | 0.083 |
| ZachLowe_NBA | 0.002 | 0.017 | 0.001 | 0.023 | 0.000 | 0.014 | 0.001 | -0.028 |
| KamalaHarris | 0.000 | 0.017 | 0.001 | 0.069 | 0.000 | -0.008 | 0.000 | 0.022 |
| politico | 0.001 | 0.017 | 0.000 | 0.028 | 0.000 | 0.047 | 0.000 | 0.062 |
| britneyspears | 0.000 | 0.017 | 0.000 | 0.112 | 0.000 | 0.049 | 0.000 | 0.055 |
| tylerthecreator | 0.000 | 0.017 | 0.014 | 0.009 | 0.000 | 0.033 | 0.009 | 0.037 |
| Android | 0.000 | 0.018 | 0.012 | -0.017 | 0.000 | -0.026 | 0.000 | 0.025 |
| SenWarren | 0.007 | 0.018 | 0.000 | 0.104 | 0.000 | 0.025 | 0.000 | 0.023 |
| CubsJoeMadd | 0.001 | 0.018 | 0.000 | -0.026 | 0.000 | 0.006 | 0.000 | 0.011 |
| therealjuicyj | 0.001 | 0.018 | 0.000 | 0.001 | 0.000 | -0.006 | 0.000 | 0.027 |
| vicenews | 0.002 | 0.018 | 0.002 | 0.005 | 0.000 | 0.012 | 0.000 | 0.023 |
| guardian | 0.011 | 0.018 | 0.000 | 0.007 | 0.000 | 0.000 | 0.000 | -0.022 |
| HP | 0.000 | 0.018 | 0.004 | 0.010 | 0.000 | 0.000 | 0.000 | -0.006 |
| Drift0r | 0.009 | 0.018 | 0.000 | 0.025 | 0.000 | -0.025 | 0.005 | -0.018 |
| JoseCanseco | 0.000 | 0.018 | 0.001 | 0.034 | 0.000 | 0.019 | 0.000 | 0.027 |
| larrykim | 0.000 | 0.018 | 0.000 | 0.037 | 0.000 | 0.056 | 0.000 | 0.011 |
| FUNimation | 0.004 | 0.018 | 0.000 | -0.017 | 0.000 | 0.022 | 0.000 | 0.009 |
| jonlovett | 0.000 | 0.018 | 0.000 | -0.013 | 0.000 | -0.038 | 0.000 | -0.040 |
| GameCrate | 0.000 | 0.018 | 0.000 | -0.013 | 0.000 | -0.012 | 0.001 | 0.031 |
| jack | 0.000 | 0.018 | 0.000 | 0.004 | 0.000 | 0.008 | 0.000 | 0.044 |
| GameTrailers | 0.000 | 0.018 | 0.000 | 0.014 | 0.000 | 0.028 | 0.000 | 0.044 |
| Qi_Infinity | 0.001 | 0.018 | 0.000 | 0.019 | 0.000 | 0.042 | 0.000 | 0.000 |
| id_2830051135 | 0.000 | 0.018 | 0.000 | 0.026 | 0.000 | 0.015 | 0.000 | 0.018 |
| LarryWentz | 0.000 | 0.018 | 0.000 | 0.031 | 0.000 | 0.008 | 0.000 | 0.018 |
| PeterMolydeux | 0.000 | 0.018 | 0.000 | 0.035 | 0.000 | 0.062 | 0.005 | 0.022 |
| nprpolitics | 0.000 | 0.018 | 0.004 | 0.038 | 0.000 | 0.082 | 0.000 | 0.018 |
| AnselElgort | 0.000 | 0.018 | 0.000 | 0.040 | 0.001 | 0.015 | 0.000 | 0.026 |
| ShareThis | 0.000 | 0.018 | 0.000 | 0.074 | 0.000 | 0.055 | 0.000 | 0.048 |
| Adaripp | 0.000 | 0.018 | 0.000 | 0.079 | 0.000 | 0.028 | 0.000 | -0.004 |
| areck0001 | 0.000 | 0.018 | 0.000 | 0.081 | 0.000 | 0.042 | 0.000 | 0.013 |
| GeorgeTakei | 0.000 | 0.018 | 0.001 | 0.052 | 0.000 | 0.001 | 0.005 | 0.019 |
| IndieCade | 0.000 | 0.018 | 0.000 | 0.014 | 0.000 | 0.004 | 0.000 | 0.028 |
| Apple | 0.000 | 0.018 | 0.005 | 0.025 | 0.000 | -0.001 | 0.000 | 0.012 |
| BenAffleck | 0.000 | 0.018 | 0.000 | 0.044 | 0.000 | 0.081 | 0.000 | 0.004 |
| mrbobodenkirk | 0.000 | 0.018 | 0.000 | 0.013 | 0.000 | 0.047 | 0.000 | -0.008 |
| DougBenson | 0.001 | 0.018 | 0.000 | 0.041 | 0.000 | 0.036 | 0.000 | 0.014 |
| EthoLP | 0.000 | 0.018 | 0.001 | -0.036 | 0.000 | -0.011 | 0.000 | 0.021 |
| RealCJ10 | 0.000 | 0.018 | 0.000 | -0.020 | 0.000 | -0.004 | 0.000 | 0.030 |
| MoviePass | 0.000 | 0.018 | 0.001 | -0.012 | 0.000 | 0.025 | 0.001 | -0.022 |
| shopdotco | 0.000 | 0.018 | 0.000 | 0.008 | 0.000 | -0.047 | 0.000 | 0.054 |
| nottjmiller | 0.000 | 0.018 | 0.000 | 0.016 | 0.000 | 0.032 | 0.000 | -0.007 |
| FunnyVines | 0.000 | 0.018 | 0.005 | 0.021 | 0.000 | 0.061 | 0.000 | -0.017 |
| Radiolab | 0.000 | 0.018 | 0.000 | 0.024 | 0.000 | 0.061 | 0.000 | -0.022 |
| wetnwildbeauty | 0.000 | 0.018 | 0.000 | 0.029 | 0.001 | 0.047 | 0.000 | 0.016 |
| paprbckparadise | 0.000 | 0.018 | 0.009 | 0.050 | 0.000 | 0.061 | 0.000 | 0.078 |
| DonCheadle | 0.006 | 0.018 | 0.000 | 0.055 | 0.000 | -0.018 | 0.000 | 0.030 |
| OregonMBB | 0.000 | 0.018 | 0.000 | 0.019 | 0.000 | -0.047 | 0.002 | 0.016 |
| StuffDrakeDoes | 0.000 | 0.018 | 0.000 | 0.024 | 0.000 | 0.061 | 0.000 | 0.016 |
| JohnBoyega | 0.000 | 0.018 | 0.000 | 0.006 | 0.000 | 0.033 | 0.002 | 0.005 |
| XplodingUnicorn | 0.000 | 0.018 | 0.015 | 0.034 | 0.000 | 0.023 | 0.007 | -0.017 |
| DennysDiner | 0.000 | 0.018 | 0.000 | -0.047 | 0.001 | 0.056 | 0.002 | 0.020 |
| shwood | 0.009 | 0.018 | 0.003 | 0.023 | 0.000 | 0.020 | 0.001 | -0.034 |
| HaileeSteinfeld | 0.000 | 0.018 | 0.000 | 0.010 | 0.000 | -0.041 | 0.000 | 0.015 |
| ShawnMichaels | 0.000 | 0.018 | 0.005 | -0.026 | 0.000 | -0.033 | 0.000 | -0.073 |
| SheaSerrano | 0.006 | 0.018 | 0.000 | -0.024 | 0.000 | -0.018 | 0.000 | -0.032 |
| NEEDforSEAT | 0.000 | 0.018 | 0.000 | -0.018 | 0.000 | -0.057 | 0.000 | -0.037 |
| SebGorka | 0.000 | 0.018 | 0.000 | -0.015 | 0.000 | -0.010 | 0.000 | -0.032 |
| blairherter | 0.000 | 0.018 | 0.000 | -0.012 | 0.000 | 0.045 | 0.000 | 0.041 |
| Genius | 0.000 | 0.018 | 0.000 | -0.007 | 0.000 | -0.026 | 0.003 | 0.020 |
| DatPiff | 0.000 | 0.018 | 0.000 | 0.005 | 0.000 | -0.018 | 0.001 | 0.051 |
| AnneMunition | 0.000 | 0.018 | 0.000 | 0.013 | 0.000 | -0.026 | 0.000 | -0.032 |
| mitchgrassi | 0.000 | 0.018 | 0.000 | 0.013 | 0.000 | -0.018 | 0.000 | -0.016 |
| scotthoying | 0.000 | 0.018 | 0.000 | 0.013 | 0.000 | -0.018 | 0.000 | -0.016 |
| alsmiffy | 0.000 | 0.018 | 0.000 | 0.016 | 0.000 | -0.033 | 0.000 | -0.047 |
| zefrank | 0.002 | 0.018 | 0.000 | 0.022 | 0.000 | 0.006 | 0.000 | -0.011 |
| HitFixUPROXX | 0.000 | 0.018 | 0.009 | 0.027 | 0.000 | -0.010 | 0.000 | 0.020 |
| Twitition | 0.005 | 0.018 | 0.000 | 0.030 | 0.000 | 0.069 | 0.000 | 0.036 |
| wbgames | 0.002 | 0.018 | 0.000 | 0.033 | 0.000 | 0.029 | 0.000 | 0.004 |
| UniqloUSA | 0.013 | 0.018 | 0.000 | 0.036 | 0.000 | -0.002 | 0.000 | 0.030 |
| KameronBennett | 0.000 | 0.018 | 0.007 | 0.039 | 0.000 | 0.100 | 0.000 | 0.056 |
| Wawa | 0.002 | 0.018 | 0.000 | 0.047 | 0.000 | 0.061 | 0.000 | 0.046 |
| NASAWebb | 0.000 | 0.018 | 0.000 | 0.047 | 0.000 | 0.077 | 0.000 | 0.030 |
| UnburntWitch | 0.000 | 0.018 | 0.000 | 0.073 | 0.000 | 0.014 | 0.000 | -0.006 |
| tyleroakley | 0.000 | 0.018 | 0.005 | 0.034 | 0.000 | 0.058 | 0.000 | 0.044 |
| HuffPost | 0.000 | 0.019 | 0.007 | 0.068 | 0.001 | 0.081 | 0.000 | 0.028 |
| GordonRamsay | 0.000 | 0.019 | 0.000 | 0.020 | 0.000 | 0.030 | 0.000 | 0.020 |
| id_965266179836252161 | 0.000 | 0.019 | 0.004 | 0.082 | 0.000 | 0.007 | 0.000 | 0.027 |
| selenagomez | 0.002 | 0.020 | 0.000 | 0.053 | 0.000 | 0.018 | 0.000 | 0.033 |
| uoregon | 0.024 | 0.020 | 0.000 | 0.054 | 0.000 | 0.004 | 0.003 | 0.046 |
| colbertlateshow | 0.000 | 0.020 | 0.000 | 0.005 | 0.000 | 0.031 | 0.005 | 0.025 |
| AdamSessler | 0.001 | 0.020 | 0.000 | 0.023 | 0.000 | 0.008 | 0.000 | 0.017 |
| archillect | 0.000 | 0.020 | 0.000 | 0.053 | 0.001 | 0.075 | 0.000 | 0.025 |
| WORLDSTAR | 0.000 | 0.020 | 0.000 | -0.024 | 0.000 | -0.001 | 0.000 | 0.001 |
| GolicAndWingo | 0.000 | 0.020 | 0.003 | -0.017 | 0.000 | 0.034 | 0.000 | -0.011 |
| NewYorker | 0.008 | 0.020 | 0.000 | 0.008 | 0.000 | 0.016 | 0.001 | 0.008 |
| troyesivan | 0.008 | 0.020 | 0.002 | -0.024 | 0.000 | -0.012 | 0.000 | 0.006 |
| maggielawson | 0.000 | 0.020 | 0.000 | -0.013 | 0.000 | 0.019 | 0.001 | 0.002 |
| KinjaDeals | 0.000 | 0.020 | 0.000 | -0.011 | 0.000 | -0.012 | 0.000 | 0.011 |
| ReggieMillerTNT | 0.002 | 0.020 | 0.000 | -0.006 | 0.000 | 0.037 | 0.001 | -0.006 |
| MenInBlazers | 0.000 | 0.020 | 0.000 | 0.014 | 0.000 | 0.037 | 0.000 | 0.031 |
| tferriss | 0.000 | 0.020 | 0.000 | 0.028 | 0.000 | 0.044 | 0.000 | 0.064 |
| Sony | 0.003 | 0.020 | 0.000 | 0.014 | 0.000 | -0.041 | 0.000 | 0.030 |
| TonyReali | 0.016 | 0.020 | 0.001 | 0.017 | 0.000 | 0.000 | 0.000 | 0.020 |
| AmericanExpress | 0.000 | 0.020 | 0.000 | 0.025 | 0.000 | -0.036 | 0.000 | 0.000 |
| JManziel2 | 0.000 | 0.020 | 0.000 | 0.000 | 0.000 | -0.045 | 0.000 | -0.021 |
| FallonTonight | 0.000 | 0.020 | 0.000 | 0.032 | 0.000 | 0.023 | 0.000 | 0.021 |
| RebelWilson | 0.000 | 0.020 | 0.000 | 0.035 | 0.000 | 0.018 | 0.000 | 0.044 |
| wootoff | 0.000 | 0.020 | 0.000 | -0.032 | 0.001 | -0.052 | 0.000 | 0.057 |
| muse | 0.020 | 0.020 | 0.040 | 0.019 | 0.000 | 0.028 | 0.003 | -0.004 |
| FiveThirtyEight | 0.004 | 0.020 | 0.000 | 0.024 | 0.000 | -0.036 | 0.000 | 0.034 |
| iamjohnoliver | 0.000 | 0.021 | 0.000 | 0.042 | 0.000 | 0.022 | 0.000 | 0.016 |
| weatherchannel | 0.000 | 0.021 | 0.000 | -0.015 | 0.000 | -0.032 | 0.000 | 0.016 |
| corbinbernsen | 0.000 | 0.021 | 0.000 | -0.010 | 0.000 | 0.018 | 0.002 | 0.002 |
| nardwuar | 0.001 | 0.021 | 0.000 | 0.003 | 0.000 | -0.004 | 0.000 | 0.054 |
| scarra | 0.000 | 0.021 | 0.003 | 0.013 | 0.000 | 0.061 | 0.000 | 0.035 |
| TobyHater | 0.000 | 0.021 | 0.002 | 0.019 | 0.000 | 0.032 | 0.000 | -0.003 |
| RealPaigeWWE | 0.005 | 0.021 | 0.000 | 0.024 | 0.000 | -0.004 | 0.000 | -0.003 |
| plex | 0.000 | 0.021 | 0.000 | 0.045 | 0.000 | 0.032 | 0.000 | 0.035 |
| RobbieAmell | 0.002 | 0.021 | 0.000 | 0.055 | 0.000 | 0.032 | 0.000 | 0.097 |
| ChrisMurphyCT | 0.000 | 0.021 | 0.000 | 0.063 | 0.000 | -0.011 | 0.000 | 0.012 |
| AdrianChen | 0.001 | 0.021 | 0.000 | 0.073 | 0.000 | 0.061 | 0.000 | 0.045 |
| earnwithdrop | 0.000 | 0.021 | 0.002 | 0.001 | 0.000 | -0.040 | 0.001 | 0.036 |
| CollegeGameDay | 0.000 | 0.021 | 0.000 | 0.004 | 0.001 | 0.013 | 0.000 | 0.027 |
| edsheeran | 0.006 | 0.021 | 0.000 | 0.041 | 0.000 | 0.021 | 0.000 | 0.065 |
| Ubisoft | 0.000 | 0.021 | 0.001 | 0.004 | 0.000 | 0.015 | 0.000 | -0.002 |
| ChrisDemarais | 0.000 | 0.021 | 0.000 | -0.026 | 0.000 | 0.022 | 0.000 | -0.011 |
| Chromecast | 0.000 | 0.021 | 0.000 | -0.024 | 0.002 | -0.026 | 0.000 | -0.022 |
| Saints | 0.000 | 0.021 | 0.003 | -0.007 | 0.000 | -0.002 | 0.000 | 0.036 |
| DJDRAMA | 0.000 | 0.021 | 0.001 | -0.004 | 0.000 | -0.010 | 0.000 | 0.051 |
| theonekatzer | 0.000 | 0.021 | 0.000 | -0.001 | 0.000 | 0.014 | 0.000 | -0.011 |
| destructoid | 0.000 | 0.021 | 0.003 | -0.001 | 0.000 | 0.061 | 0.000 | 0.030 |
| Cernovich | 0.000 | 0.021 | 0.000 | 0.002 | 0.000 | -0.002 | 0.000 | -0.047 |
| murrman5 | 0.000 | 0.021 | 0.000 | 0.008 | 0.001 | 0.006 | 0.000 | -0.037 |
| littlecaesars | 0.000 | 0.021 | 0.001 | 0.013 | 0.000 | -0.010 | 0.000 | -0.042 |
| DamienFahey | 0.000 | 0.021 | 0.000 | 0.016 | 0.001 | -0.002 | 0.000 | 0.020 |
| GhostPanther | 0.000 | 0.021 | 0.000 | 0.019 | 0.000 | -0.010 | 0.000 | 0.025 |
| GetPerkCodes | 0.000 | 0.021 | 0.000 | 0.019 | 0.000 | 0.014 | 0.000 | -0.022 |
| FreakazoidA | 0.000 | 0.021 | 0.000 | 0.025 | 0.000 | 0.022 | 0.012 | 0.030 |
| MartyTheElder | 0.000 | 0.021 | 0.000 | 0.042 | 0.000 | -0.002 | 0.000 | 0.056 |
| PorcupineTree | 0.005 | 0.021 | 0.000 | 0.042 | 0.000 | 0.069 | 0.000 | 0.025 |
| thenextweb | 0.000 | 0.021 | 0.003 | 0.050 | 0.000 | 0.022 | 0.000 | 0.041 |
| dog_feelings | 0.000 | 0.022 | 0.000 | 0.045 | 0.001 | 0.034 | 0.005 | 0.013 |
| paramore | 0.000 | 0.022 | 0.000 | 0.044 | 0.000 | 0.007 | 0.000 | 0.036 |
| JoyAnnReid | 0.000 | 0.022 | 0.000 | 0.075 | 0.000 | 0.023 | 0.000 | 0.057 |
| NYTMinusContext | 0.000 | 0.022 | 0.002 | 0.026 | 0.000 | -0.050 | 0.000 | -0.041 |
| AnnCurry | 0.003 | 0.022 | 0.000 | 0.010 | 0.000 | -0.013 | 0.000 | 0.016 |
| SenFranken | 0.000 | 0.022 | 0.000 | 0.063 | 0.001 | 0.040 | 0.000 | 0.039 |
| ErinAndrews | 0.000 | 0.022 | 0.003 | 0.003 | 0.000 | -0.044 | 0.000 | 0.019 |
| Purex | 0.000 | 0.022 | 0.000 | 0.068 | 0.000 | 0.056 | 0.000 | 0.011 |
| JColeNC | 0.005 | 0.022 | 0.000 | 0.013 | 0.000 | -0.036 | 0.004 | 0.002 |
| tomhanks | 0.001 | 0.022 | 0.000 | 0.072 | 0.000 | 0.062 | 0.000 | 0.113 |
| jesus | 0.000 | 0.023 | 0.033 | 0.004 | 0.000 | -0.005 | 0.004 | 0.022 |
| MargaretAtwood | 0.000 | 0.023 | 0.000 | 0.011 | 0.001 | 0.002 | 0.000 | 0.004 |
| natashaleggero | 0.004 | 0.023 | 0.000 | 0.021 | 0.000 | 0.022 | 0.000 | 0.031 |
| WomensHealthMag | 0.009 | 0.023 | 0.002 | 0.057 | 0.000 | 0.035 | 0.000 | 0.079 |
| thomaslennon | 0.000 | 0.023 | 0.000 | 0.076 | 0.000 | 0.035 | 0.000 | 0.040 |
| darth | 0.000 | 0.023 | 0.000 | 0.079 | 0.000 | 0.035 | 0.000 | 0.097 |
| itisalovelylife | 0.001 | 0.023 | 0.000 | 0.112 | 0.000 | 0.055 | 0.001 | 0.101 |
| Skrillex | 0.000 | 0.023 | 0.004 | 0.042 | 0.000 | -0.011 | 0.000 | 0.113 |
| pattonoswalt | 0.000 | 0.023 | 0.002 | 0.052 | 0.000 | 0.039 | 0.000 | 0.047 |
| sethmeyers | 0.001 | 0.023 | 0.000 | 0.050 | 0.000 | 0.058 | 0.000 | 0.054 |
| MusclesGlasses | 0.001 | 0.023 | 0.000 | -0.023 | 0.000 | -0.047 | 0.000 | 0.030 |
| OldHossRadbourn | 0.000 | 0.023 | 0.000 | -0.020 | 0.000 | 0.004 | 0.000 | 0.007 |
| StoneBrewing | 0.000 | 0.023 | 0.000 | -0.020 | 0.000 | 0.004 | 0.000 | -0.017 |
| Ronnie2K | 0.000 | 0.023 | 0.000 | 0.026 | 0.000 | -0.061 | 0.000 | 0.026 |
| AvrilLavigne | 0.000 | 0.023 | 0.000 | 0.052 | 0.000 | 0.011 | 0.000 | 0.083 |
| wkamaubell | 0.000 | 0.023 | 0.000 | 0.055 | 0.000 | -0.004 | 0.000 | 0.035 |
| NHL | 0.004 | 0.024 | 0.000 | 0.016 | 0.000 | -0.006 | 0.000 | 0.018 |
| MakeUseOf | 0.000 | 0.024 | 0.003 | 0.019 | 0.000 | -0.060 | 0.000 | 0.073 |
| LIRIK | 0.000 | 0.024 | 0.000 | 0.048 | 0.000 | 0.014 | 0.000 | -0.015 |
| Attack | 0.002 | 0.024 | 0.001 | 0.050 | 0.000 | 0.028 | 0.000 | 0.044 |
| KeshaRose | 0.000 | 0.024 | 0.010 | 0.067 | 0.000 | -0.026 | 0.000 | 0.040 |
| TomFelton | 0.000 | 0.024 | 0.000 | 0.074 | 0.000 | -0.006 | 0.001 | 0.066 |
| MittRomney | 0.000 | 0.024 | 0.000 | -0.005 | 0.000 | -0.031 | 0.000 | -0.024 |
| rejectedjokes | 0.000 | 0.024 | 0.000 | 0.004 | 0.000 | -0.015 | 0.000 | -0.011 |
| RepAdamSchiff | 0.010 | 0.024 | 0.000 | 0.058 | 0.000 | 0.006 | 0.000 | 0.011 |
| cursenetwork | 0.000 | 0.024 | 0.000 | -0.029 | 0.000 | -0.052 | 0.000 | 0.043 |
| IntelGaming | 0.001 | 0.024 | 0.000 | -0.021 | 0.000 | -0.063 | 0.000 | 0.036 |
| MalcolmNance | 0.000 | 0.024 | 0.000 | 0.034 | 0.000 | 0.001 | 0.000 | 0.064 |
| animalcrossing | 0.000 | 0.024 | 0.023 | 0.036 | 0.000 | 0.087 | 0.000 | 0.012 |
| timheidecker | 0.000 | 0.024 | 0.000 | 0.052 | 0.000 | 0.028 | 0.000 | 0.008 |
| channingtatum | 0.000 | 0.024 | 0.000 | 0.084 | 0.000 | 0.049 | 0.001 | 0.029 |
| djWHEAT | 0.000 | 0.024 | 0.000 | -0.015 | 0.000 | 0.022 | 0.000 | 0.015 |
| fribergCS | 0.000 | 0.024 | 0.000 | -0.001 | 0.000 | -0.010 | 0.000 | 0.010 |
| f0restCS | 0.000 | 0.024 | 0.000 | -0.001 | 0.000 | -0.010 | 0.000 | 0.010 |
| maikelele | 0.000 | 0.024 | 0.000 | -0.001 | 0.000 | -0.010 | 0.000 | 0.010 |
| DeviantArt | 0.000 | 0.024 | 0.000 | 0.008 | 0.000 | 0.022 | 0.000 | 0.062 |
| Official_GDC | 0.000 | 0.024 | 0.000 | 0.010 | 0.000 | 0.037 | 0.006 | -0.037 |
| FIFAWorldCup | 0.000 | 0.024 | 0.000 | 0.013 | 0.000 | -0.002 | 0.000 | 0.041 |
| ErvinSantana_54 | 0.000 | 0.024 | 0.000 | 0.013 | 0.000 | 0.045 | 0.000 | 0.030 |
| kirstendunst | 0.000 | 0.024 | 0.000 | 0.016 | 0.000 | -0.049 | 0.000 | -0.027 |
| PTXofficial | 0.000 | 0.024 | 0.000 | 0.019 | 0.000 | -0.041 | 0.000 | -0.001 |
| PVPLive | 0.000 | 0.024 | 0.000 | 0.030 | 0.000 | 0.045 | 0.002 | 0.025 |
| Interscope | 0.000 | 0.024 | 0.000 | 0.036 | 0.000 | 0.061 | 0.000 | 0.062 |
| RattyBurvil | 0.000 | 0.024 | 0.000 | 0.039 | 0.000 | 0.092 | 0.000 | 0.030 |
| ProSyndicate | 0.003 | 0.024 | 0.000 | 0.042 | 0.000 | 0.014 | 0.000 | -0.032 |
| BenSavage | 0.000 | 0.024 | 0.000 | 0.050 | 0.000 | 0.061 | 0.000 | 0.051 |
| las930 | 0.006 | 0.024 | 0.000 | 0.064 | 0.000 | 0.061 | 0.000 | 0.041 |
| CrackerBarrel | 0.002 | 0.024 | 0.000 | 0.070 | 0.000 | 0.037 | 0.000 | 0.020 |
| GalGadot | 0.000 | 0.024 | 0.000 | 0.084 | 0.000 | 0.061 | 0.000 | 0.072 |
| deray | 0.000 | 0.024 | 0.000 | 0.021 | 0.000 | 0.008 | 0.000 | 0.028 |
| AverageGoal | 0.000 | 0.024 | 0.000 | 0.035 | 0.000 | 0.008 | 0.000 | -0.045 |
| Steam_Support | 0.000 | 0.024 | 0.000 | 0.002 | 0.000 | -0.007 | 0.000 | 0.008 |
| verizon | 0.000 | 0.024 | 0.000 | 0.080 | 0.000 | 0.069 | 0.000 | 0.094 |
| TeenVogue | 0.000 | 0.024 | 0.000 | 0.106 | 0.001 | 0.028 | 0.000 | 0.059 |
| LastWeekTonight | 0.000 | 0.024 | 0.000 | 0.080 | 0.000 | 0.044 | 0.000 | 0.038 |
| colortheory | 0.009 | 0.024 | 0.001 | 0.038 | 0.000 | 0.007 | 0.000 | 0.000 |
| PaulMcCartney | 0.000 | 0.025 | 0.005 | 0.021 | 0.000 | 0.025 | 0.000 | 0.002 |
| mike_pence | 0.005 | 0.025 | 0.000 | 0.030 | 0.000 | 0.081 | 0.000 | 0.081 |
| id_878739731219189761 | 0.000 | 0.025 | 0.016 | 0.068 | 0.000 | 0.006 | 0.000 | 0.043 |
| DOOM | 0.000 | 0.025 | 0.000 | -0.022 | 0.000 | -0.005 | 0.000 | 0.066 |
| xsplit | 0.000 | 0.025 | 0.000 | -0.020 | 0.000 | -0.032 | 0.000 | 0.035 |
| MotorolaUS | 0.000 | 0.025 | 0.000 | 0.007 | 0.000 | -0.012 | 0.000 | 0.022 |
| DystopianYA | 0.004 | 0.025 | 0.004 | 0.014 | 0.000 | 0.028 | 0.000 | 0.053 |
| RealCarrotFacts | 0.003 | 0.025 | 0.000 | 0.028 | 0.000 | 0.042 | 0.000 | 0.018 |
| Cudlitz | 0.000 | 0.025 | 0.000 | 0.031 | 0.001 | 0.028 | 0.000 | 0.057 |
| SavedYouAClick | 0.000 | 0.025 | 0.000 | 0.017 | 0.000 | -0.013 | 0.000 | -0.013 |
| VICE | 0.000 | 0.025 | 0.011 | 0.019 | 0.000 | 0.031 | 0.000 | 0.024 |
| GearboxOfficial | 0.000 | 0.026 | 0.000 | -0.007 | 0.000 | 0.005 | 0.000 | 0.047 |
| TwitterSupport | 0.002 | 0.026 | 0.000 | 0.012 | 0.000 | -0.041 | 0.000 | 0.013 |
| bobsaget | 0.003 | 0.026 | 0.000 | 0.072 | 0.000 | 0.068 | 0.000 | 0.049 |
| jasoninthehouse | 0.000 | 0.026 | 0.002 | -0.051 | 0.000 | -0.061 | 0.000 | -0.088 |
| shoe0nhead | 0.000 | 0.026 | 0.000 | 0.001 | 0.000 | -0.032 | 0.010 | 0.016 |
| BunBTrillOG | 0.000 | 0.026 | 0.000 | 0.006 | 0.000 | -0.018 | 0.000 | 0.021 |
| mindyfinn | 0.000 | 0.026 | 0.000 | 0.081 | 0.000 | 0.018 | 0.015 | 0.092 |
| shonnacoleman | 0.000 | 0.026 | 0.001 | 0.125 | 0.000 | 0.061 | 0.000 | 0.045 |
| BillClinton | 0.005 | 0.026 | 0.000 | 0.043 | 0.001 | 0.013 | 0.001 | 0.020 |
| krassenstein | 0.000 | 0.026 | 0.000 | 0.054 | 0.000 | -0.020 | 0.000 | 0.026 |
| ACLU | 0.000 | 0.026 | 0.000 | 0.094 | 0.000 | 0.038 | 0.000 | 0.009 |
| DisneyStudios | 0.000 | 0.026 | 0.000 | -0.001 | 0.000 | -0.047 | 0.000 | 0.003 |
| BrentSpiner | 0.000 | 0.026 | 0.000 | 0.037 | 0.000 | 0.064 | 0.000 | 0.036 |
| Harry_Styles | 0.000 | 0.026 | 0.000 | 0.059 | 0.001 | -0.020 | 0.000 | 0.021 |
| MLBGIFs | 0.000 | 0.026 | 0.003 | -0.032 | 0.000 | 0.010 | 0.000 | -0.031 |
| Lauren_Southern | 0.000 | 0.026 | 0.001 | 0.004 | 0.001 | 0.022 | 0.006 | 0.001 |
| YouTubeGaming | 0.004 | 0.026 | 0.001 | 0.010 | 0.000 | -0.013 | 0.000 | 0.012 |
| EdKrassen | 0.000 | 0.026 | 0.000 | 0.055 | 0.000 | 0.004 | 0.000 | -0.007 |
| toph_bbq | 0.000 | 0.027 | 0.000 | -0.024 | 0.000 | 0.045 | 0.000 | 0.056 |
| ArmadaUGS | 0.007 | 0.027 | 0.000 | -0.024 | 0.000 | 0.045 | 0.000 | 0.056 |
| ZeldaUniverse | 0.000 | 0.027 | 0.002 | -0.021 | 0.000 | -0.002 | 0.000 | 0.067 |
| itsgabrielleu | 0.000 | 0.027 | 0.000 | -0.012 | 0.000 | 0.014 | 0.000 | -0.011 |
| LTZONDA | 0.000 | 0.027 | 0.000 | 0.002 | 0.000 | -0.033 | 0.000 | 0.046 |
| BrianDEvans | 0.000 | 0.027 | 0.003 | 0.010 | 0.001 | -0.081 | 0.002 | -0.053 |
| OregonPINK | 0.003 | 0.027 | 0.005 | 0.010 | 0.000 | -0.018 | 0.000 | 0.051 |
| CollegeHumor | 0.000 | 0.027 | 0.000 | 0.013 | 0.000 | 0.022 | 0.000 | 0.015 |
| OldRowOfficial | 0.000 | 0.027 | 0.000 | 0.016 | 0.001 | 0.061 | 0.000 | 0.062 |
| TiffaniThiessen | 0.001 | 0.027 | 0.000 | 0.019 | 0.000 | -0.010 | 0.000 | -0.016 |
| Money23Green | 0.000 | 0.027 | 0.000 | 0.025 | 0.000 | 0.029 | 0.000 | 0.025 |
| TheRealDratch | 0.000 | 0.027 | 0.000 | 0.027 | 0.000 | -0.010 | 0.000 | 0.004 |
| RubinReport | 0.000 | 0.027 | 0.000 | 0.027 | 0.001 | 0.022 | 0.002 | 0.010 |
| Crunchyroll | 0.000 | 0.027 | 0.002 | 0.027 | 0.001 | 0.077 | 0.000 | 0.025 |
| LivPsy | 0.011 | 0.027 | 0.000 | 0.033 | 0.000 | 0.014 | 0.000 | 0.010 |
| RheaButcher | 0.000 | 0.027 | 0.000 | 0.033 | 0.000 | 0.037 | 0.000 | -0.001 |
| 60Minutes | 0.000 | 0.027 | 0.000 | 0.033 | 0.000 | 0.037 | 0.000 | 0.010 |
| MatureTrumpTwts | 0.000 | 0.027 | 0.000 | 0.039 | 0.000 | -0.026 | 0.000 | -0.063 |
| AwardsDarwin | 0.000 | 0.027 | 0.000 | 0.039 | 0.000 | 0.022 | 0.000 | 0.020 |
| lithub | 0.000 | 0.027 | 0.002 | 0.042 | 0.000 | 0.022 | 0.000 | 0.015 |
| tobyfox | 0.000 | 0.027 | 0.000 | 0.050 | 0.000 | 0.053 | 0.001 | -0.037 |
| id_736002032306290690 | 0.000 | 0.027 | 0.000 | 0.053 | 0.000 | 0.006 | 0.000 | -0.037 |
| 41Strange | 0.000 | 0.027 | 0.000 | 0.067 | 0.000 | 0.053 | 0.006 | 0.030 |
| Willaaaah | 0.000 | 0.027 | 0.000 | 0.067 | 0.000 | 0.069 | 0.000 | 0.087 |
| Hasbro | 0.000 | 0.027 | 0.000 | 0.090 | 0.002 | 0.077 | 0.005 | 0.051 |
| Official_PAX | 0.000 | 0.027 | 0.000 | -0.015 | 0.000 | 0.000 | 0.000 | 0.023 |
| premierleague | 0.000 | 0.027 | 0.000 | -0.002 | 0.000 | 0.025 | 0.000 | 0.056 |
| BillRatchet | 0.000 | 0.027 | 0.000 | 0.023 | 0.000 | 0.006 | 0.010 | -0.018 |
| mcbridemelissa | 0.000 | 0.027 | 0.002 | 0.055 | 0.000 | 0.062 | 0.000 | 0.043 |
| ParisHilton | 0.000 | 0.027 | 0.000 | 0.091 | 0.000 | 0.025 | 0.000 | 0.072 |
| sonic_hedgehog | 0.003 | 0.027 | 0.000 | 0.017 | 0.000 | 0.056 | 0.000 | 0.005 |
| CynthiaLIVE | 0.001 | 0.027 | 0.000 | 0.025 | 0.001 | -0.002 | 0.000 | -0.016 |
| amazonmusic | 0.000 | 0.027 | 0.000 | 0.028 | 0.000 | -0.007 | 0.000 | 0.041 |
| RealMikeWilbon | 0.000 | 0.027 | 0.000 | -0.004 | 0.000 | -0.031 | 0.000 | -0.021 |
| LanaDelRey | 0.000 | 0.027 | 0.000 | 0.051 | 0.000 | 0.023 | 0.000 | 0.014 |
| notaxation | 0.000 | 0.027 | 0.000 | -0.041 | 0.000 | -0.018 | 0.000 | 0.070 |
| lilyachty | 0.000 | 0.027 | 0.000 | -0.015 | 0.000 | -0.025 | 0.002 | 0.022 |
| Caitlyn_Jenner | 0.000 | 0.027 | 0.001 | 0.021 | 0.000 | 0.035 | 0.000 | 0.040 |
| jonathancoulton | 0.001 | 0.027 | 0.000 | 0.038 | 0.000 | 0.042 | 0.000 | 0.048 |
| realjeffreyross | 0.011 | 0.027 | 0.004 | 0.069 | 0.000 | 0.088 | 0.000 | 0.066 |
| justdemi | 0.000 | 0.027 | 0.003 | 0.098 | 0.000 | 0.082 | 0.000 | 0.097 |
| GOGcom | 0.021 | 0.027 | 0.000 | 0.012 | 0.000 | 0.031 | 0.000 | -0.044 |
| BetteMidler | 0.000 | 0.027 | 0.000 | 0.137 | 0.000 | 0.112 | 0.000 | 0.087 |
| RepMaxineWaters | 0.004 | 0.028 | 0.000 | 0.098 | 0.000 | -0.004 | 0.005 | 0.068 |
| amazonmturk | 0.005 | 0.028 | 0.000 | 0.025 | 0.000 | -0.014 | 0.000 | 0.014 |
| tomdelonge | 0.037 | 0.028 | 0.000 | 0.037 | 0.000 | 0.042 | 0.000 | 0.028 |
| JensenAckles | 0.000 | 0.028 | 0.000 | 0.039 | 0.000 | 0.036 | 0.003 | -0.005 |
| adamcarolla | 0.000 | 0.028 | 0.005 | 0.041 | 0.000 | 0.036 | 0.000 | 0.047 |
| GreenDay | 0.000 | 0.028 | 0.001 | 0.071 | 0.000 | 0.047 | 0.010 | 0.095 |
| MVG_Mew2King | 0.004 | 0.028 | 0.003 | -0.043 | 0.000 | -0.018 | 0.000 | 0.059 |
| GameOverGreggy | 0.006 | 0.028 | 0.000 | -0.018 | 0.000 | 0.004 | 0.000 | 0.007 |
| NBAonTNT | 0.000 | 0.028 | 0.000 | -0.002 | 0.000 | -0.018 | 0.000 | -0.045 |
| alfranken | 0.000 | 0.028 | 0.002 | 0.003 | 0.000 | -0.018 | 0.000 | -0.007 |
| owlcity | 0.000 | 0.028 | 0.000 | 0.006 | 0.000 | 0.004 | 0.000 | 0.007 |
| NikaHarper | 0.000 | 0.028 | 0.001 | 0.026 | 0.000 | 0.054 | 0.000 | 0.021 |
| NY_Comic_Con | 0.000 | 0.028 | 0.007 | 0.032 | 0.000 | 0.061 | 0.000 | 0.002 |
| JoeBudden | 0.000 | 0.028 | 0.013 | 0.032 | 0.000 | 0.068 | 0.001 | 0.007 |
| ruralmoms | 0.000 | 0.028 | 0.017 | 0.117 | 0.001 | 0.104 | 0.000 | 0.026 |
| Konami | 0.000 | 0.028 | 0.004 | 0.019 | 0.000 | 0.057 | 0.000 | 0.055 |
| JuddLegum | 0.000 | 0.028 | 0.007 | 0.074 | 0.000 | -0.007 | 0.000 | 0.016 |
| kumailn | 0.004 | 0.029 | 0.001 | 0.024 | 0.000 | -0.016 | 0.009 | -0.023 |
| hannibalburess | 0.008 | 0.029 | 0.000 | 0.038 | 0.000 | 0.007 | 0.000 | 0.011 |
| BoJackHorseman | 0.000 | 0.029 | 0.000 | -0.002 | 0.000 | 0.006 | 0.000 | -0.006 |
| scrowder | 0.000 | 0.029 | 0.000 | 0.012 | 0.000 | 0.037 | 0.000 | 0.031 |
| AssangeDefence | 0.000 | 0.029 | 0.002 | 0.023 | 0.001 | 0.050 | 0.000 | -0.006 |
| iamwill | 0.002 | 0.029 | 0.000 | 0.055 | 0.001 | 0.056 | 0.000 | 0.072 |
| carlyraejepsen | 0.000 | 0.029 | 0.000 | 0.064 | 0.000 | -0.031 | 0.000 | 0.085 |
| trent_reznor | 0.000 | 0.029 | 0.001 | 0.062 | 0.000 | 0.063 | 0.000 | 0.115 |
| SkyWilliams | 0.000 | 0.030 | 0.000 | -0.043 | 0.000 | 0.053 | 0.000 | -0.022 |
| AshleyJ | 0.000 | 0.030 | 0.000 | -0.021 | 0.000 | 0.037 | 0.000 | 0.020 |
| Seinfeld2000 | 0.003 | 0.030 | 0.000 | -0.009 | 0.000 | -0.002 | 0.000 | -0.001 |
| id_835176008668102662 | 0.007 | 0.030 | 0.000 | -0.009 | 0.000 | 0.006 | 0.000 | 0.015 |
| ClashofClans | 0.004 | 0.030 | 0.002 | -0.004 | 0.000 | -0.026 | 0.001 | -0.001 |
| BetterCallSaul | 0.000 | 0.030 | 0.000 | -0.004 | 0.000 | 0.037 | 0.000 | 0.004 |
| greta | 0.004 | 0.030 | 0.000 | -0.001 | 0.000 | -0.026 | 0.000 | -0.006 |
| guwop | 0.000 | 0.030 | 0.021 | 0.010 | 0.000 | -0.018 | 0.009 | 0.046 |
| ArmouredSkeptic | 0.002 | 0.030 | 0.000 | 0.013 | 0.000 | -0.018 | 0.000 | 0.025 |
| OnePerfectShot | 0.000 | 0.030 | 0.000 | 0.019 | 0.000 | -0.018 | 0.000 | 0.036 |
| AmandaSeyfried | 0.001 | 0.030 | 0.003 | 0.019 | 0.000 | -0.002 | 0.003 | -0.011 |
| KarenKilgariff | 0.000 | 0.030 | 0.000 | 0.022 | 0.000 | -0.033 | 0.000 | -0.037 |
| LifeIsStrange | 0.000 | 0.030 | 0.000 | 0.022 | 0.000 | 0.022 | 0.000 | -0.073 |
| MelBrooks | 0.000 | 0.030 | 0.000 | 0.022 | 0.000 | 0.061 | 0.000 | -0.006 |
| LolStvicious | 0.000 | 0.030 | 0.000 | 0.025 | 0.000 | 0.069 | 0.000 | 0.025 |
| Thermaltake | 0.000 | 0.030 | 0.003 | 0.027 | 0.000 | 0.061 | 0.000 | 0.145 |
| NotBillWalton | 0.000 | 0.030 | 0.003 | 0.036 | 0.000 | -0.026 | 0.000 | -0.011 |
| theofficenbc | 0.000 | 0.030 | 0.000 | 0.039 | 0.000 | 0.053 | 0.000 | 0.082 |
| SWTOR | 0.000 | 0.030 | 0.000 | 0.039 | 0.000 | 0.061 | 0.001 | 0.010 |
| FaZeApex | 0.000 | 0.030 | 0.011 | 0.042 | 0.000 | -0.018 | 0.000 | -0.027 |
| buenothebear | 0.001 | 0.030 | 0.000 | 0.042 | 0.000 | 0.037 | 0.000 | 0.025 |
| noveliciouss | 0.000 | 0.030 | 0.000 | 0.050 | 0.000 | 0.022 | 0.000 | 0.072 |
| ericgarland | 0.000 | 0.030 | 0.003 | 0.053 | 0.000 | 0.014 | 0.000 | 0.087 |
| Entrepreneur | 0.001 | 0.030 | 0.000 | 0.053 | 0.002 | 0.045 | 0.000 | 0.036 |
| realjknoxville | 0.005 | 0.030 | 0.001 | 0.027 | 0.000 | 0.033 | 0.000 | 0.057 |
| Patriots | 0.000 | 0.030 | 0.004 | 0.036 | 0.000 | 0.049 | 0.000 | 0.001 |
| HulkHogan | 0.000 | 0.030 | 0.008 | -0.039 | 0.001 | -0.045 | 0.000 | -0.004 |
| Sia | 0.000 | 0.030 | 0.000 | 0.007 | 0.000 | -0.025 | 0.000 | 0.018 |
| kevinabstract | 0.005 | 0.030 | 0.013 | 0.014 | 0.000 | 0.028 | 0.000 | 0.044 |
| iamkareno | 0.000 | 0.030 | 0.000 | 0.021 | 0.000 | 0.042 | 0.001 | 0.031 |
| jgwentworth | 0.000 | 0.030 | 0.000 | 0.045 | 0.001 | 0.055 | 0.000 | 0.022 |
| jonathansfrakes | 0.001 | 0.030 | 0.000 | 0.050 | 0.000 | 0.055 | 0.000 | 0.040 |
| amandapalmer | 0.015 | 0.030 | 0.000 | 0.055 | 0.000 | 0.062 | 0.000 | 0.040 |
| id_158429303 | 0.000 | 0.030 | 0.000 | 0.093 | 0.000 | 0.075 | 0.000 | 0.022 |
| InfluensterCB | 0.000 | 0.030 | 0.000 | 0.095 | 0.000 | 0.075 | 0.000 | 0.035 |
| SamuelLJackson | 0.000 | 0.030 | 0.000 | 0.029 | 0.000 | 0.056 | 0.000 | 0.044 |
| VancityReynolds | 0.003 | 0.030 | 0.005 | 0.027 | 0.000 | 0.038 | 0.000 | 0.036 |
| dodo | 0.000 | 0.030 | 0.000 | -0.003 | 0.000 | 0.031 | 0.002 | -0.005 |
| OITNB | 0.001 | 0.030 | 0.008 | 0.011 | 0.000 | 0.053 | 0.000 | 0.006 |
| amazon_movies | 0.000 | 0.030 | 0.002 | 0.031 | 0.000 | 0.020 | 0.000 | 0.036 |
| ItsFreeAtLast | 0.000 | 0.030 | 0.000 | 0.095 | 0.000 | 0.103 | 0.002 | -0.001 |
| ZooeyDeschanel | 0.000 | 0.030 | 0.000 | 0.036 | 0.000 | -0.007 | 0.000 | 0.010 |
| RottenTomatoes | 0.000 | 0.030 | 0.000 | 0.063 | 0.000 | 0.040 | 0.000 | 0.065 |
| BettyMWhite | 0.005 | 0.030 | 0.000 | 0.078 | 0.002 | 0.084 | 0.000 | 0.020 |
| JohnLegere | 0.000 | 0.030 | 0.007 | -0.020 | 0.000 | 0.017 | 0.000 | 0.029 |
| DRUDGE_REPORT | 0.000 | 0.031 | 0.000 | -0.017 | 0.000 | 0.004 | 0.000 | 0.001 |
| KFUCKINGP | 0.000 | 0.031 | 0.000 | 0.017 | 0.000 | 0.004 | 0.000 | 0.020 |
| deanjnorris | 0.000 | 0.031 | 0.001 | 0.031 | 0.000 | 0.034 | 0.000 | 0.055 |
| VictoriaJustice | 0.000 | 0.031 | 0.000 | 0.034 | 0.000 | 0.034 | 0.000 | 0.051 |
| EvaLongoria | 0.000 | 0.031 | 0.008 | 0.106 | 0.000 | 0.104 | 0.000 | 0.078 |
| ufc | 0.000 | 0.031 | 0.000 | -0.023 | 0.000 | 0.047 | 0.000 | -0.026 |
| PEEPSANDCOMPANY | 0.001 | 0.031 | 0.000 | 0.039 | 0.000 | 0.004 | 0.000 | 0.054 |
| cgpgrey | 0.000 | 0.031 | 0.000 | 0.042 | 0.000 | 0.011 | 0.001 | -0.012 |
| NewsBreaker | 0.000 | 0.031 | 0.000 | 0.060 | 0.000 | 0.032 | 0.005 | 0.030 |
| eatmovemake | 0.000 | 0.031 | 0.000 | 0.083 | 0.001 | 0.075 | 0.000 | 0.054 |
| azizansari | 0.000 | 0.031 | 0.005 | 0.022 | 0.000 | -0.007 | 0.000 | 0.074 |
| PrisonPlanet | 0.000 | 0.031 | 0.015 | 0.001 | 0.000 | 0.015 | 0.000 | 0.000 |
| mental_floss | 0.000 | 0.031 | 0.000 | 0.054 | 0.000 | 0.010 | 0.000 | 0.010 |
| DisneyPixar | 0.000 | 0.031 | 0.000 | 0.054 | 0.000 | 0.020 | 0.000 | 0.050 |
| TeamCoco | 0.000 | 0.031 | 0.000 | 0.064 | 0.000 | 0.044 | 0.000 | 0.051 |
| Pink | 0.000 | 0.031 | 0.004 | 0.090 | 0.000 | 0.100 | 0.000 | 0.109 |
| zaynmalik | 0.005 | 0.032 | 0.002 | 0.059 | 0.002 | 0.007 | 0.000 | 0.061 |
| RedHourBen | 0.000 | 0.032 | 0.000 | 0.066 | 0.000 | 0.082 | 0.000 | 0.048 |
| RealHughJackman | 0.000 | 0.032 | 0.000 | 0.059 | 0.000 | 0.043 | 0.001 | 0.047 |
| MichelleObama | 0.000 | 0.032 | 0.000 | 0.117 | 0.000 | 0.024 | 0.000 | 0.030 |
| MurrayNewlands | 0.000 | 0.032 | 0.000 | 0.033 | 0.000 | 0.042 | 0.000 | 0.058 |
| wbpictures | 0.000 | 0.032 | 0.000 | 0.051 | 0.000 | 0.020 | 0.000 | 0.051 |
| BraddJaffy | 0.000 | 0.032 | 0.002 | 0.103 | 0.000 | 0.025 | 0.000 | 0.091 |
| ChaelSonnen | 0.003 | 0.032 | 0.000 | -0.034 | 0.001 | 0.002 | 0.000 | -0.057 |
| id_851661253944766465 | 0.001 | 0.032 | 0.001 | -0.027 | 0.000 | -0.078 | 0.000 | -0.066 |
| 45PedroMartinez | 0.000 | 0.032 | 0.000 | -0.015 | 0.000 | 0.028 | 0.000 | 0.004 |
| TuckerCarlson | 0.018 | 0.032 | 0.000 | -0.003 | 0.000 | -0.005 | 0.004 | 0.004 |
| GIGABYTEUSA | 0.000 | 0.032 | 0.000 | -0.001 | 0.000 | -0.038 | 0.000 | 0.083 |
| IEM | 0.001 | 0.032 | 0.001 | 0.016 | 0.000 | -0.012 | 0.000 | 0.079 |
| _AlexHirsch | 0.000 | 0.032 | 0.000 | 0.019 | 0.000 | 0.015 | 0.000 | -0.031 |
| tylerrjoseph | 0.000 | 0.032 | 0.000 | 0.038 | 0.000 | 0.028 | 0.000 | 0.000 |
| clgaming | 0.000 | 0.032 | 0.001 | 0.038 | 0.000 | 0.115 | 0.000 | 0.022 |
| SofiaVergara | 0.000 | 0.032 | 0.000 | 0.043 | 0.000 | 0.042 | 0.000 | 0.026 |
| thegrandtour | 0.006 | 0.032 | 0.000 | 0.059 | 0.001 | 0.088 | 0.000 | 0.040 |
| NatlParkService | 0.009 | 0.032 | 0.018 | 0.129 | 0.000 | 0.022 | 0.000 | 0.070 |
| TheRealGZA | 0.001 | 0.032 | 0.000 | -0.049 | 0.000 | -0.026 | 0.000 | 0.051 |
| ImmortalHD | 0.000 | 0.032 | 0.009 | -0.046 | 0.000 | 0.061 | 0.000 | -0.073 |
| Alchemist | 0.000 | 0.032 | 0.000 | -0.012 | 0.000 | -0.010 | 0.000 | 0.046 |
| glennbeck | 0.000 | 0.032 | 0.003 | -0.001 | 0.000 | -0.041 | 0.000 | 0.036 |
| KELLYROWLAND | 0.000 | 0.032 | 0.000 | 0.013 | 0.001 | 0.014 | 0.000 | 0.046 |
| _Brendonsmall | 0.002 | 0.032 | 0.000 | 0.013 | 0.000 | 0.053 | 0.000 | 0.010 |
| JDMorgan | 0.000 | 0.032 | 0.000 | 0.016 | 0.000 | 0.022 | 0.001 | 0.041 |
| Cowboycerrone | 0.000 | 0.032 | 0.000 | 0.019 | 0.000 | 0.045 | 0.000 | 0.020 |
| TMobileHelp | 0.000 | 0.032 | 0.003 | 0.022 | 0.000 | 0.014 | 0.000 | -0.032 |
| fanfiction_txt | 0.000 | 0.032 | 0.000 | 0.036 | 0.000 | 0.045 | 0.000 | 0.015 |
| SpeakerRyan | 0.007 | 0.032 | 0.000 | 0.042 | 0.000 | 0.022 | 0.000 | 0.004 |
| WeAreTheInCrowd | 0.002 | 0.032 | 0.000 | 0.047 | 0.000 | 0.029 | 0.000 | 0.067 |
| MichaelCondrey | 0.015 | 0.032 | 0.000 | 0.056 | 0.000 | 0.006 | 0.000 | -0.011 |
| electrolemon | 0.000 | 0.032 | 0.002 | 0.056 | 0.000 | 0.029 | 0.000 | 0.030 |
| ajcampos01 | 0.000 | 0.032 | 0.000 | 0.070 | 0.003 | 0.100 | 0.003 | 0.062 |
| MJMcKean | 0.000 | 0.032 | 0.000 | 0.076 | 0.000 | 0.045 | 0.000 | 0.051 |
| POTUS44 | 0.000 | 0.032 | 0.003 | 0.058 | 0.000 | -0.018 | 0.006 | 0.015 |
| AH_Michael | 0.002 | 0.033 | 0.000 | -0.013 | 0.000 | 0.010 | 0.001 | 0.078 |
| BuzzFeedNews | 0.000 | 0.033 | 0.000 | 0.027 | 0.000 | -0.013 | 0.001 | 0.036 |
| chandlerriggs | 0.000 | 0.033 | 0.000 | 0.044 | 0.000 | 0.046 | 0.000 | 0.078 |
| markhoppus | 0.000 | 0.033 | 0.000 | 0.053 | 0.001 | 0.057 | 0.000 | 0.059 |
| RiceGum | 0.000 | 0.033 | 0.000 | 0.063 | 0.000 | 0.075 | 0.004 | 0.078 |
| shaymitch | 0.000 | 0.033 | 0.026 | 0.076 | 0.000 | 0.063 | 0.000 | 0.032 |
| instagc | 0.000 | 0.033 | 0.000 | -0.004 | 0.000 | 0.007 | 0.000 | -0.077 |
| jasonsegel | 0.008 | 0.033 | 0.000 | 0.013 | 0.000 | -0.027 | 0.000 | -0.013 |
| tedlieu | 0.001 | 0.033 | 0.000 | 0.104 | 0.000 | 0.048 | 0.000 | 0.051 |
| officialjaden | 0.000 | 0.033 | 0.000 | -0.014 | 0.000 | -0.031 | 0.000 | -0.012 |
| Zendaya | 0.013 | 0.033 | 0.000 | 0.027 | 0.000 | 0.012 | 0.000 | 0.001 |
| Ninja | 0.000 | 0.033 | 0.000 | 0.042 | 0.000 | 0.017 | 0.001 | 0.001 |
| Olympics | 0.005 | 0.033 | 0.000 | 0.057 | 0.000 | 0.001 | 0.000 | 0.026 |
| WWERollins | 0.002 | 0.034 | 0.000 | -0.036 | 0.000 | -0.068 | 0.000 | -0.079 |
| kerrywashington | 0.000 | 0.034 | 0.001 | -0.012 | 0.000 | -0.011 | 0.000 | 0.012 |
| ByronBernstein | 0.004 | 0.034 | 0.005 | -0.002 | 0.000 | -0.039 | 0.000 | 0.059 |
| prolificac | 0.000 | 0.034 | 0.001 | 0.011 | 0.000 | 0.004 | 0.000 | -0.041 |
| SeaNanners | 0.000 | 0.034 | 0.004 | 0.016 | 0.000 | 0.018 | 0.000 | 0.040 |
| NekoCase | 0.000 | 0.034 | 0.000 | 0.019 | 0.000 | 0.025 | 0.005 | -0.017 |
| MannyPacquiaoTR | 0.000 | 0.034 | 0.002 | 0.021 | 0.000 | -0.075 | 0.002 | -0.026 |
| ViewSonic | 0.000 | 0.034 | 0.000 | 0.032 | 0.000 | 0.032 | 0.000 | 0.054 |
| id_766342899764166657 | 0.003 | 0.034 | 0.000 | 0.063 | 0.001 | 0.061 | 0.000 | -0.017 |
| EmmanuelMacron | 0.000 | 0.034 | 0.017 | 0.089 | 0.000 | 0.054 | 0.000 | 0.083 |
| usweekly | 0.000 | 0.034 | 0.000 | 0.102 | 0.000 | 0.075 | 0.000 | 0.083 |
| Yoplait | 0.000 | 0.034 | 0.003 | 0.120 | 0.000 | 0.061 | 0.000 | 0.097 |
| FauxJohnMadden | 0.000 | 0.034 | 0.000 | -0.002 | 0.000 | -0.012 | 0.001 | 0.035 |
| redditstatus | 0.000 | 0.034 | 0.000 | 0.019 | 0.000 | 0.106 | 0.003 | 0.048 |
| TurtleBeach | 0.000 | 0.034 | 0.000 | 0.030 | 0.000 | 0.006 | 0.000 | 0.035 |
| horseysurprise | 0.000 | 0.034 | 0.000 | -0.009 | 0.001 | 0.012 | 0.011 | 0.038 |
| ASlavitt | 0.000 | 0.034 | 0.000 | 0.059 | 0.000 | 0.036 | 0.000 | 0.076 |
| dril | 0.007 | 0.034 | 0.001 | 0.013 | 0.000 | -0.026 | 0.004 | -0.011 |
| richbrian | 0.001 | 0.034 | 0.000 | -0.033 | 0.000 | 0.059 | 0.000 | -0.006 |
| WIRED | 0.016 | 0.034 | 0.003 | 0.038 | 0.000 | 0.063 | 0.000 | 0.072 |
| NZXT | 0.000 | 0.034 | 0.000 | 0.000 | 0.000 | -0.045 | 0.000 | -0.018 |
| lindsaylohan | 0.002 | 0.034 | 0.000 | 0.062 | 0.000 | 0.014 | 0.000 | 0.079 |
| megturney | 0.000 | 0.035 | 0.000 | -0.008 | 0.000 | 0.022 | 0.000 | 0.048 |
| MyNintendoNews | 0.000 | 0.035 | 0.000 | -0.003 | 0.000 | -0.038 | 0.010 | 0.035 |
| gerardway | 0.019 | 0.035 | 0.002 | 0.028 | 0.000 | 0.048 | 0.001 | 0.031 |
| shailenewoodley | 0.000 | 0.035 | 0.006 | 0.031 | 0.000 | 0.002 | 0.000 | 0.022 |
| CLG_HotshotGG | 0.000 | 0.035 | 0.000 | 0.033 | 0.000 | 0.075 | 0.000 | 0.022 |
| harto | 0.000 | 0.035 | 0.000 | 0.040 | 0.000 | 0.042 | 0.000 | 0.031 |
| RealTimeWWII | 0.000 | 0.035 | 0.012 | 0.040 | 0.000 | 0.042 | 0.002 | 0.062 |
| WaltDisneyWorld | 0.000 | 0.035 | 0.000 | 0.062 | 0.000 | 0.008 | 0.000 | 0.018 |
| Skype | 0.000 | 0.035 | 0.000 | 0.071 | 0.000 | 0.035 | 0.000 | 0.057 |
| gogreen18 | 0.000 | 0.035 | 0.000 | 0.079 | 0.000 | 0.015 | 0.000 | 0.048 |
| prettynameless | 0.000 | 0.035 | 0.000 | 0.083 | 0.000 | 0.055 | 0.000 | 0.057 |
| cameronesposito | 0.000 | 0.035 | 0.000 | 0.086 | 0.000 | 0.055 | 0.003 | 0.044 |
| 2K | 0.000 | 0.035 | 0.002 | 0.023 | 0.001 | 0.022 | 0.000 | 0.016 |
| RealRonHoward | 0.000 | 0.035 | 0.000 | 0.044 | 0.000 | 0.087 | 0.005 | 0.055 |
| Evy_Lynch | 0.000 | 0.035 | 0.000 | 0.051 | 0.000 | -0.013 | 0.003 | 0.016 |
| SethGreen | 0.000 | 0.035 | 0.000 | 0.036 | 0.000 | 0.003 | 0.000 | 0.016 |
| realDonaldTrump | 0.000 | 0.035 | 0.000 | 0.024 | 0.000 | 0.037 | 0.000 | -0.004 |
| EA_DICE | 0.000 | 0.035 | 0.000 | -0.041 | 0.000 | -0.010 | 0.000 | -0.022 |
| RyanTheTwit | 0.000 | 0.035 | 0.000 | -0.029 | 0.000 | 0.029 | 0.000 | -0.011 |
| GailSimone | 0.000 | 0.035 | 0.000 | -0.012 | 0.000 | 0.037 | 0.000 | 0.010 |
| RobertIrvine | 0.000 | 0.035 | 0.004 | -0.007 | 0.000 | -0.033 | 0.000 | 0.030 |
| TroyBakerVA | 0.002 | 0.035 | 0.000 | -0.007 | 0.000 | 0.006 | 0.000 | 0.030 |
| LAN_Valen | 0.000 | 0.035 | 0.002 | 0.008 | 0.000 | -0.033 | 0.000 | -0.001 |
| JCrossover | 0.000 | 0.035 | 0.000 | 0.016 | 0.000 | -0.002 | 0.000 | 0.004 |
| camphalfblood | 0.000 | 0.035 | 0.000 | 0.019 | 0.000 | -0.018 | 0.000 | 0.041 |
| MelissaBenoist | 0.000 | 0.035 | 0.000 | 0.025 | 0.000 | 0.037 | 0.000 | 0.046 |
| democracynow | 0.000 | 0.035 | 0.000 | 0.030 | 0.000 | 0.029 | 0.000 | 0.015 |
| Migos | 0.000 | 0.035 | 0.000 | 0.033 | 0.000 | -0.002 | 0.000 | 0.077 |
| NicholasHoult | 0.000 | 0.035 | 0.005 | 0.039 | 0.000 | 0.069 | 0.000 | 0.015 |
| Jon4Lakers | 0.000 | 0.035 | 0.000 | 0.042 | 0.000 | 0.006 | 0.000 | 0.051 |
| tomgreenlive | 0.000 | 0.035 | 0.000 | 0.044 | 0.000 | 0.014 | 0.000 | 0.051 |
| comex | 0.000 | 0.035 | 0.000 | 0.050 | 0.000 | 0.014 | 0.000 | 0.051 |
| TonyRobbins | 0.000 | 0.035 | 0.000 | 0.050 | 0.000 | 0.053 | 0.000 | 0.025 |
| Neslo | 0.000 | 0.035 | 0.000 | 0.056 | 0.000 | -0.002 | 0.000 | -0.006 |
| Whea7s | 0.000 | 0.035 | 0.000 | 0.056 | 0.000 | -0.002 | 0.000 | -0.006 |
| Sharp_tK | 0.005 | 0.035 | 0.001 | 0.056 | 0.000 | -0.002 | 0.000 | -0.006 |
| thedailybeast | 0.000 | 0.035 | 0.000 | 0.067 | 0.000 | 0.029 | 0.000 | 0.025 |
| superdeluxe | 0.000 | 0.035 | 0.000 | 0.073 | 0.000 | 0.022 | 0.002 | 0.077 |
| Aly_Raisman | 0.013 | 0.035 | 0.000 | 0.076 | 0.000 | -0.033 | 0.000 | 0.067 |
| iSmashFizzle | 0.000 | 0.035 | 0.000 | 0.090 | 0.000 | 0.053 | 0.000 | 0.051 |
| RockstarGames | 0.000 | 0.035 | 0.000 | 0.008 | 0.000 | 0.001 | 0.004 | -0.004 |
| PokemonGoNews | 0.000 | 0.035 | 0.000 | -0.004 | 0.000 | -0.020 | 0.000 | -0.045 |
| JohnCena | 0.000 | 0.035 | 0.000 | 0.013 | 0.001 | 0.055 | 0.000 | -0.017 |
| zachbraff | 0.000 | 0.035 | 0.000 | 0.008 | 0.000 | 0.018 | 0.001 | 0.055 |
| mashable | 0.000 | 0.036 | 0.000 | 0.072 | 0.000 | 0.023 | 0.003 | 0.030 |
| kingstontech | 0.000 | 0.036 | 0.003 | 0.028 | 0.000 | 0.044 | 0.000 | 0.019 |
| MissyElliott | 0.000 | 0.036 | 0.000 | 0.037 | 0.000 | 0.025 | 0.000 | 0.085 |
| xychelsea | 0.000 | 0.036 | 0.000 | 0.079 | 0.000 | 0.031 | 0.000 | 0.023 |
| travisbarker | 0.000 | 0.036 | 0.000 | 0.057 | 0.000 | 0.036 | 0.000 | 0.065 |
| imgur | 0.000 | 0.036 | 0.000 | -0.010 | 0.000 | -0.039 | 0.014 | 0.097 |
| therealroseanne | 0.000 | 0.036 | 0.007 | -0.002 | 0.000 | 0.004 | 0.000 | -0.060 |
| NiPGaming | 0.001 | 0.036 | 0.000 | 0.011 | 0.000 | -0.011 | 0.001 | 0.016 |
| ORIGINPCCEO | 0.003 | 0.036 | 0.005 | 0.024 | 0.000 | 0.004 | 0.004 | 0.012 |
| TSMReginald | 0.000 | 0.036 | 0.000 | 0.039 | 0.001 | 0.083 | 0.000 | -0.007 |
| SamsungUS | 0.000 | 0.036 | 0.000 | 0.045 | 0.000 | -0.004 | 0.000 | -0.017 |
| HonestToddler | 0.001 | 0.036 | 0.000 | 0.052 | 0.000 | 0.011 | 0.000 | -0.003 |
| femfreq | 0.000 | 0.036 | 0.010 | 0.065 | 0.000 | 0.032 | 0.000 | 0.030 |
| alisonbrie | 0.000 | 0.036 | 0.003 | -0.014 | 0.000 | 0.009 | 0.000 | 0.031 |
| PlayStation | 0.012 | 0.036 | 0.000 | 0.017 | 0.000 | -0.003 | 0.000 | 0.042 |
| KeeganMKey | 0.000 | 0.037 | 0.000 | 0.011 | 0.000 | 0.009 | 0.001 | 0.030 |
| joanneprada | 0.000 | 0.037 | 0.001 | 0.046 | 0.000 | -0.025 | 0.000 | 0.047 |
| RichardHammond | 0.000 | 0.037 | 0.011 | 0.063 | 0.000 | 0.110 | 0.000 | 0.063 |
| GameStop | 0.000 | 0.037 | 0.009 | 0.027 | 0.000 | -0.008 | 0.000 | 0.023 |
| AnkerOfficial | 0.000 | 0.037 | 0.012 | 0.019 | 0.000 | -0.005 | 0.000 | -0.013 |
| DairyQueen | 0.014 | 0.037 | 0.000 | 0.040 | 0.000 | -0.012 | 0.000 | 0.035 |
| ThomasSanders | 0.001 | 0.037 | 0.000 | 0.055 | 0.000 | 0.028 | 0.000 | 0.031 |
| thestep2company | 0.000 | 0.037 | 0.000 | 0.131 | 0.000 | 0.115 | 0.000 | 0.040 |
| HouseofCards | 0.006 | 0.037 | 0.000 | 0.009 | 0.000 | 0.033 | 0.000 | -0.003 |
| WheatThins | 0.000 | 0.037 | 0.004 | 0.042 | 0.000 | -0.015 | 0.000 | 0.019 |
| KicksDeals | 0.000 | 0.037 | 0.013 | 0.050 | 0.000 | 0.007 | 0.000 | 0.005 |
| netflix | 0.000 | 0.038 | 0.001 | 0.012 | 0.000 | 0.032 | 0.000 | 0.020 |
| GameOfThrones | 0.000 | 0.038 | 0.002 | -0.007 | 0.000 | 0.016 | 0.000 | 0.026 |
| wikileaks | 0.000 | 0.038 | 0.009 | 0.038 | 0.000 | 0.025 | 0.000 | 0.062 |
| Avengers | 0.004 | 0.038 | 0.011 | 0.041 | 0.001 | 0.112 | 0.000 | 0.008 |
| TeamRazer | 0.000 | 0.038 | 0.000 | -0.015 | 0.000 | -0.006 | 0.000 | 0.015 |
| russwest44 | 0.000 | 0.038 | 0.008 | 0.070 | 0.001 | 0.062 | 0.001 | 0.043 |
| moby_dickhead | 0.002 | 0.038 | 0.000 | 0.084 | 0.000 | 0.012 | 0.000 | 0.060 |
| klout | 0.000 | 0.038 | 0.000 | 0.093 | 0.000 | 0.112 | 0.000 | 0.031 |
| PaulaAbdul | 0.000 | 0.038 | 0.000 | 0.064 | 0.000 | 0.062 | 0.000 | 0.027 |
| arzE | 0.000 | 0.038 | 0.002 | -0.013 | 0.000 | -0.014 | 0.000 | -0.012 |
| KateUpton | 0.006 | 0.038 | 0.006 | 0.017 | 0.001 | -0.003 | 0.006 | -0.001 |
| andymilonakis | 0.001 | 0.038 | 0.000 | 0.023 | 0.000 | 0.025 | 0.000 | 0.025 |
| Beyonce | 0.000 | 0.038 | 0.000 | 0.055 | 0.000 | 0.070 | 0.000 | 0.036 |
| pottermore | 0.000 | 0.038 | 0.000 | 0.073 | 0.000 | 0.003 | 0.000 | 0.017 |
| FreddieFreeman5 | 0.000 | 0.038 | 0.000 | -0.009 | 0.000 | 0.006 | 0.000 | 0.025 |
| hellogames | 0.000 | 0.038 | 0.000 | -0.001 | 0.000 | -0.049 | 0.007 | 0.020 |
| jamessmurray | 0.000 | 0.038 | 0.000 | -0.001 | 0.000 | -0.026 | 0.000 | -0.006 |
| Ltd_To_Two | 0.000 | 0.038 | 0.000 | 0.005 | 0.000 | -0.026 | 0.000 | -0.027 |
| NeedADebitCard | 0.000 | 0.038 | 0.000 | 0.010 | 0.000 | -0.010 | 0.000 | 0.046 |
| CKlosterman | 0.000 | 0.038 | 0.000 | 0.022 | 0.000 | -0.002 | 0.000 | 0.025 |
| DarkHorseComics | 0.000 | 0.038 | 0.000 | 0.022 | 0.000 | 0.029 | 0.000 | 0.030 |
| Bravotv | 0.000 | 0.038 | 0.000 | 0.027 | 0.000 | 0.022 | 0.000 | -0.006 |
| DOTA2 | 0.001 | 0.038 | 0.000 | 0.033 | 0.000 | 0.069 | 0.000 | 0.025 |
| RiotPhreak | 0.000 | 0.038 | 0.000 | 0.036 | 0.000 | 0.092 | 0.000 | 0.051 |
| thewonderyears | 0.000 | 0.038 | 0.000 | 0.047 | 0.000 | -0.002 | 0.000 | 0.015 |
| IAMLenaHeadey | 0.001 | 0.038 | 0.000 | 0.047 | 0.000 | 0.061 | 0.000 | 0.082 |
| OverclockersUK | 0.002 | 0.038 | 0.000 | 0.050 | 0.000 | 0.022 | 0.000 | 0.051 |
| RedditGifts | 0.000 | 0.038 | 0.000 | 0.053 | 0.000 | 0.069 | 0.000 | 0.020 |
| SenFeinstein | 0.000 | 0.038 | 0.000 | 0.073 | 0.000 | 0.069 | 0.000 | 0.067 |
| BadlandsNPS | 0.000 | 0.038 | 0.004 | 0.087 | 0.000 | 0.014 | 0.000 | 0.082 |
| GainSaverShop | 0.000 | 0.038 | 0.000 | 0.098 | 0.000 | 0.022 | 0.000 | 0.082 |
| tweematic | 0.000 | 0.038 | 0.000 | 0.104 | 0.000 | 0.116 | 0.000 | 0.072 |
| nickkroll | 0.002 | 0.038 | 0.000 | 0.044 | 0.000 | 0.049 | 0.000 | 0.059 |
| OzzyOsbourne | 0.000 | 0.039 | 0.000 | 0.056 | 0.001 | 0.097 | 0.000 | 0.047 |
| JordanPeele | 0.001 | 0.039 | 0.002 | -0.026 | 0.000 | 0.004 | 0.000 | 0.006 |
| JimNorton | 0.001 | 0.039 | 0.000 | -0.005 | 0.000 | 0.039 | 0.000 | 0.045 |
| DepressedDarth | 0.000 | 0.039 | 0.005 | 0.013 | 0.000 | 0.004 | 0.000 | -0.012 |
| themichaelcaine | 0.000 | 0.039 | 0.000 | 0.026 | 0.000 | 0.047 | 0.000 | 0.016 |
| machinegunkelly | 0.000 | 0.039 | 0.001 | 0.042 | 0.000 | -0.032 | 0.001 | 0.064 |
| KalaniBallFree | 0.000 | 0.039 | 0.003 | 0.045 | 0.000 | 0.011 | 0.000 | -0.007 |
| thekatvond | 0.000 | 0.039 | 0.004 | 0.047 | 0.000 | 0.097 | 0.000 | 0.049 |
| somedayilllearn | 0.000 | 0.039 | 0.000 | 0.055 | 0.000 | 0.083 | 0.000 | 0.049 |
| JordinSparks | 0.002 | 0.039 | 0.000 | 0.086 | 0.000 | 0.075 | 0.000 | 0.121 |
| joerogan | 0.000 | 0.039 | 0.004 | -0.013 | 0.000 | 0.012 | 0.002 | 0.016 |
| CDPROJEKTRED | 0.005 | 0.039 | 0.008 | 0.010 | 0.000 | -0.013 | 0.000 | 0.001 |
| googlenexus | 0.000 | 0.039 | 0.000 | 0.025 | 0.000 | -0.019 | 0.000 | 0.008 |
| googledrive | 0.000 | 0.039 | 0.000 | 0.038 | 0.000 | -0.007 | 0.000 | 0.047 |
| EW | 0.000 | 0.039 | 0.000 | 0.044 | 0.000 | 0.010 | 0.010 | 0.055 |
| MorganWebb | 0.000 | 0.039 | 0.007 | 0.059 | 0.000 | 0.046 | 0.005 | 0.055 |
| eentertainment | 0.000 | 0.039 | 0.000 | 0.123 | 0.001 | 0.093 | 0.000 | 0.043 |
| TheDailyShow | 0.000 | 0.039 | 0.000 | 0.092 | 0.000 | 0.107 | 0.000 | 0.062 |
| abbijacobson | 0.000 | 0.039 | 0.000 | 0.038 | 0.000 | -0.058 | 0.007 | 0.026 |
| UMGEvents | 0.000 | 0.039 | 0.025 | 0.052 | 0.000 | -0.012 | 0.001 | -0.018 |
| ElevateGG | 0.000 | 0.039 | 0.000 | 0.064 | 0.000 | 0.015 | 0.000 | 0.062 |
| mcgregor_ewan | 0.000 | 0.039 | 0.000 | 0.076 | 0.000 | 0.022 | 0.000 | 0.013 |
| pitbull | 0.000 | 0.039 | 0.002 | 0.100 | 0.000 | 0.062 | 0.003 | 0.101 |
| SethMacFarlane | 0.000 | 0.040 | 0.000 | 0.030 | 0.000 | 0.015 | 0.000 | 0.092 |
| NeweggHotDeals | 0.000 | 0.040 | 0.000 | 0.005 | 0.000 | 0.018 | 0.000 | 0.018 |
| RobGronkowski | 0.002 | 0.040 | 0.007 | 0.101 | 0.001 | 0.063 | 0.000 | 0.044 |
| fakedansavage | 0.004 | 0.040 | 0.004 | 0.039 | 0.000 | 0.031 | 0.000 | 0.010 |
| karengillan | 0.010 | 0.040 | 0.000 | 0.055 | 0.000 | 0.098 | 0.002 | 0.043 |
| HistoryInPics | 0.000 | 0.040 | 0.000 | 0.061 | 0.000 | -0.008 | 0.000 | 0.010 |
| MichaelPhelps | 0.001 | 0.040 | 0.000 | 0.068 | 0.000 | 0.031 | 0.000 | 0.068 |
| HillaryClinton | 0.004 | 0.040 | 0.000 | 0.073 | 0.000 | -0.001 | 0.000 | 0.004 |
| robdyrdek | 0.000 | 0.040 | 0.000 | -0.020 | 0.000 | -0.036 | 0.008 | 0.056 |
| ConanOBrien | 0.000 | 0.040 | 0.003 | 0.042 | 0.000 | 0.008 | 0.000 | 0.069 |
| robcorddry | 0.006 | 0.040 | 0.000 | 0.004 | 0.000 | 0.015 | 0.000 | 0.047 |
| thebrianposehn | 0.002 | 0.040 | 0.010 | 0.039 | 0.000 | 0.046 | 0.000 | 0.016 |
| CoryBooker | 0.000 | 0.041 | 0.000 | 0.064 | 0.000 | 0.026 | 0.000 | 0.031 |
| Kripparrian | 0.000 | 0.041 | 0.000 | -0.007 | 0.000 | -0.002 | 0.000 | -0.022 |
| Yg_Trece | 0.000 | 0.041 | 0.000 | -0.004 | 0.000 | -0.033 | 0.000 | -0.001 |
| BuckyIsotope | 0.000 | 0.041 | 0.000 | -0.004 | 0.000 | 0.006 | 0.005 | -0.053 |
| Camila_Cabello | 0.000 | 0.041 | 0.000 | 0.005 | 0.000 | -0.033 | 0.000 | -0.001 |
| BBBaumgartner | 0.000 | 0.041 | 0.000 | 0.010 | 0.000 | 0.045 | 0.000 | 0.015 |
| OC3D | 0.003 | 0.041 | 0.000 | 0.013 | 0.000 | -0.041 | 0.000 | 0.041 |
| darkstockphotos | 0.000 | 0.041 | 0.000 | 0.013 | 0.000 | -0.026 | 0.000 | 0.087 |
| ManUtd | 0.000 | 0.041 | 0.001 | 0.013 | 0.000 | 0.006 | 0.003 | 0.020 |
| iownjd | 0.010 | 0.041 | 0.000 | 0.030 | 0.000 | 0.029 | 0.000 | -0.001 |
| sark | 0.000 | 0.041 | 0.000 | 0.036 | 0.000 | 0.022 | 0.000 | 0.030 |
| tapbots | 0.000 | 0.041 | 0.000 | 0.044 | 0.000 | 0.006 | 0.000 | 0.087 |
| CandiceAccola | 0.000 | 0.041 | 0.000 | 0.050 | 0.000 | 0.069 | 0.000 | 0.030 |
| PGA_JohnDaly | 0.005 | 0.041 | 0.014 | 0.061 | 0.000 | 0.022 | 0.000 | 0.030 |
| TheHungerGames | 0.000 | 0.041 | 0.000 | 0.067 | 0.000 | 0.006 | 0.000 | 0.041 |
| eatwholly | 0.000 | 0.041 | 0.019 | 0.087 | 0.000 | 0.069 | 0.000 | 0.025 |
| hpyhomefamily | 0.000 | 0.041 | 0.000 | 0.135 | 0.002 | 0.084 | 0.000 | 0.015 |
| acadianathrifty | 0.000 | 0.041 | 0.005 | 0.138 | 0.000 | 0.092 | 0.000 | 0.025 |
| id_719324795167309827 | 0.000 | 0.041 | 0.000 | 0.019 | 0.000 | 0.003 | 0.000 | -0.001 |
| ericwareheim | 0.000 | 0.041 | 0.000 | 0.057 | 0.000 | 0.010 | 0.000 | 0.047 |
| Yousuckatcookin | 0.016 | 0.041 | 0.000 | -0.033 | 0.000 | -0.032 | 0.000 | 0.021 |
| SimpsonsQOTD | 0.005 | 0.041 | 0.000 | -0.018 | 0.000 | 0.054 | 0.000 | 0.045 |
| ericstonestreet | 0.000 | 0.041 | 0.000 | 0.024 | 0.000 | 0.018 | 0.000 | 0.016 |
| surface | 0.020 | 0.041 | 0.000 | 0.039 | 0.000 | 0.011 | 0.000 | -0.050 |
| HeymanHustle | 0.000 | 0.041 | 0.000 | 0.058 | 0.000 | 0.032 | 0.014 | 0.040 |
| HarveyLevinTMZ | 0.000 | 0.041 | 0.000 | 0.058 | 0.000 | 0.032 | 0.004 | 0.087 |
| NiykeeHeaton | 0.005 | 0.041 | 0.000 | 0.081 | 0.000 | 0.104 | 0.000 | 0.035 |
| PLLTVSeries | 0.008 | 0.041 | 0.007 | 0.096 | 0.000 | 0.047 | 0.000 | 0.030 |
| BuzzFeed | 0.000 | 0.042 | 0.000 | 0.049 | 0.000 | 0.000 | 0.000 | 0.041 |
| VGFGamers | 0.000 | 0.042 | 0.005 | 0.004 | 0.000 | 0.015 | 0.000 | 0.022 |
| SonyPictures | 0.000 | 0.042 | 0.001 | 0.019 | 0.000 | 0.008 | 0.000 | 0.009 |
| GSUniverse | 0.000 | 0.042 | 0.000 | 0.023 | 0.000 | 0.055 | 0.001 | 0.031 |
| blink182 | 0.000 | 0.042 | 0.000 | 0.067 | 0.001 | 0.042 | 0.000 | 0.044 |
| SpikeTheBeetle | 0.000 | 0.042 | 0.000 | 0.067 | 0.002 | 0.062 | 0.000 | 0.079 |
| alleniverson | 0.009 | 0.042 | 0.000 | 0.069 | 0.000 | 0.022 | 0.000 | 0.044 |
| Lord_Voldemort7 | 0.000 | 0.042 | 0.000 | 0.053 | 0.000 | 0.070 | 0.000 | 0.053 |
| warriors | 0.000 | 0.042 | 0.003 | 0.047 | 0.001 | 0.020 | 0.045 | 0.036 |
| DonaldJTrumpJr | 0.000 | 0.042 | 0.000 | 0.028 | 0.000 | 0.092 | 0.000 | 0.037 |
| dunkindonuts | 0.000 | 0.042 | 0.000 | 0.038 | 0.000 | 0.061 | 0.005 | 0.013 |
| SWatercolour | 0.000 | 0.042 | 0.016 | 0.069 | 0.000 | 0.041 | 0.005 | 0.064 |
| linkinpark | 0.018 | 0.042 | 0.000 | 0.078 | 0.000 | 0.046 | 0.000 | 0.094 |
| ladygaga | 0.005 | 0.042 | 0.004 | 0.141 | 0.002 | 0.123 | 0.004 | 0.059 |
| Lawrence | 0.002 | 0.043 | 0.000 | 0.032 | 0.000 | 0.000 | 0.000 | 0.039 |
| llcoolj | 0.000 | 0.043 | 0.000 | 0.088 | 0.000 | 0.075 | 0.000 | 0.064 |
| ActualEPAFacts | 0.000 | 0.043 | 0.000 | 0.120 | 0.000 | 0.062 | 0.010 | 0.085 |
| xdannyxbrownx | 0.000 | 0.043 | 0.000 | 0.064 | 0.000 | 0.007 | 0.000 | 0.041 |
| fart | 0.000 | 0.043 | 0.000 | 0.009 | 0.000 | 0.001 | 0.001 | 0.008 |
| PLAYERUNKNOWN | 0.000 | 0.043 | 0.000 | 0.011 | 0.000 | -0.004 | 0.007 | -0.031 |
| id_744454819285442560 | 0.000 | 0.043 | 0.000 | 0.031 | 0.000 | 0.012 | 0.000 | 0.029 |
| midnight | 0.000 | 0.043 | 0.000 | 0.062 | 0.000 | 0.049 | 0.000 | 0.083 |
| VansWarpedTour | 0.000 | 0.043 | 0.000 | 0.042 | 0.000 | -0.001 | 0.000 | 0.028 |
| MrTeller | 0.000 | 0.043 | 0.004 | 0.042 | 0.000 | 0.093 | 0.000 | 0.039 |
| alt_fda | 0.000 | 0.043 | 0.030 | 0.114 | 0.000 | 0.063 | 0.000 | 0.117 |
| aaronpaul_8 | 0.003 | 0.044 | 0.000 | 0.040 | 0.000 | 0.022 | 0.000 | -0.003 |
| IGN | 0.000 | 0.044 | 0.000 | 0.002 | 0.000 | 0.027 | 0.000 | 0.048 |
| POTUS | 0.018 | 0.044 | 0.000 | 0.028 | 0.001 | 0.039 | 0.010 | 0.013 |
| kroger | 0.000 | 0.044 | 0.001 | -0.009 | 0.000 | -0.026 | 0.000 | -0.016 |
| Cricketnation | 0.000 | 0.044 | 0.000 | -0.004 | 0.000 | -0.026 | 0.001 | 0.036 |
| capitalweather | 0.000 | 0.044 | 0.000 | 0.005 | 0.000 | -0.026 | 0.000 | -0.011 |
| davematthewsbnd | 0.000 | 0.044 | 0.000 | 0.013 | 0.000 | -0.002 | 0.000 | 0.020 |
| RealGilbert | 0.000 | 0.044 | 0.000 | 0.016 | 0.000 | 0.092 | 0.001 | 0.036 |
| rhettandlink | 0.000 | 0.044 | 0.022 | 0.033 | 0.000 | -0.010 | 0.000 | -0.006 |
| caspercadiaN | 0.000 | 0.044 | 0.000 | 0.033 | 0.000 | 0.006 | 0.000 | 0.010 |
| gifthulk | 0.000 | 0.044 | 0.000 | 0.036 | 0.000 | 0.022 | 0.000 | -0.027 |
| CommonWhiteGrls | 0.000 | 0.044 | 0.000 | 0.047 | 0.000 | 0.006 | 0.000 | 0.046 |
| booksandthebear | 0.000 | 0.044 | 0.000 | 0.053 | 0.000 | 0.069 | 0.000 | 0.051 |
| YahooEnt | 0.000 | 0.044 | 0.000 | 0.061 | 0.000 | 0.077 | 0.000 | 0.056 |
| DaveSFoley | 0.000 | 0.044 | 0.000 | 0.078 | 0.000 | 0.037 | 0.003 | 0.036 |
| mommye | 0.000 | 0.044 | 0.000 | 0.087 | 0.001 | 0.116 | 0.000 | 0.036 |
| Shannon91981 | 0.000 | 0.044 | 0.000 | 0.110 | 0.000 | 0.077 | 0.000 | 0.046 |
| MLBStats | 0.003 | 0.044 | 0.002 | -0.023 | 0.000 | 0.039 | 0.000 | -0.017 |
| sundarpichai | 0.010 | 0.044 | 0.000 | -0.020 | 0.000 | -0.018 | 0.000 | 0.007 |
| rogerfederer | 0.000 | 0.044 | 0.000 | -0.005 | 0.000 | -0.090 | 0.000 | -0.050 |
| bobbyscar | 0.000 | 0.044 | 0.000 | -0.005 | 0.000 | 0.068 | 0.000 | 0.059 |
| verified | 0.000 | 0.044 | 0.000 | 0.037 | 0.000 | 0.039 | 0.000 | 0.035 |
| chpwn | 0.000 | 0.044 | 0.000 | 0.055 | 0.000 | 0.011 | 0.002 | 0.073 |
| LMFAO | 0.000 | 0.044 | 0.000 | 0.073 | 0.000 | 0.075 | 0.004 | 0.092 |
| KeeganAllen | 0.004 | 0.044 | 0.000 | 0.089 | 0.000 | 0.061 | 0.000 | 0.078 |
| LeoDiCaprio | 0.000 | 0.044 | 0.000 | 0.079 | 0.000 | 0.050 | 0.000 | 0.046 |
| kristenschaaled | 0.000 | 0.044 | 0.000 | 0.054 | 0.000 | 0.026 | 0.001 | 0.043 |
| MrJamesMay | 0.001 | 0.044 | 0.004 | 0.058 | 0.000 | 0.097 | 0.000 | 0.067 |
| StackSocial | 0.000 | 0.044 | 0.000 | 0.088 | 0.000 | 0.068 | 0.000 | 0.088 |
| danawhite | 0.004 | 0.044 | 0.000 | 0.011 | 0.000 | 0.002 | 0.000 | 0.031 |
| KyloR3n | 0.000 | 0.045 | 0.000 | 0.039 | 0.000 | 0.053 | 0.000 | 0.021 |
| Pontifex | 0.012 | 0.045 | 0.000 | 0.024 | 0.000 | 0.000 | 0.000 | 0.055 |
| GovGaryJohnson | 0.008 | 0.045 | 0.000 | 0.059 | 0.000 | 0.062 | 0.000 | 0.006 |
| GiveawayPromote | 0.000 | 0.045 | 0.000 | 0.088 | 0.001 | 0.100 | 0.000 | 0.011 |
| katyperry | 0.000 | 0.045 | 0.000 | 0.059 | 0.000 | 0.046 | 0.000 | 0.077 |
| TheRealStanLee | 0.000 | 0.045 | 0.005 | 0.069 | 0.000 | 0.053 | 0.000 | 0.057 |
| RoosterTeeth | 0.012 | 0.045 | 0.000 | -0.018 | 0.000 | -0.009 | 0.000 | -0.020 |
| tweetsauce | 0.000 | 0.045 | 0.000 | -0.007 | 0.000 | 0.033 | 0.000 | -0.013 |
| SenSanders | 0.000 | 0.045 | 0.011 | 0.080 | 0.000 | 0.068 | 0.002 | 0.026 |
| ID_AA_Carmack | 0.000 | 0.045 | 0.000 | 0.059 | 0.000 | 0.063 | 0.000 | 0.047 |
| facebook | 0.000 | 0.045 | 0.000 | 0.068 | 0.000 | 0.051 | 0.000 | 0.067 |
| RuPaul | 0.007 | 0.046 | 0.039 | 0.076 | 0.000 | 0.051 | 0.000 | 0.047 |
| paulhardware | 0.000 | 0.046 | 0.000 | 0.009 | 0.000 | 0.064 | 0.000 | 0.054 |
| id_824139632354988033 | 0.005 | 0.046 | 0.005 | 0.108 | 0.000 | 0.014 | 0.000 | 0.065 |
| BreakingNews | 0.004 | 0.046 | 0.000 | 0.036 | 0.000 | 0.006 | 0.000 | 0.021 |
| GOP | 0.000 | 0.046 | 0.006 | 0.042 | 0.000 | 0.047 | 0.000 | 0.026 |
| TooFaced | 0.000 | 0.046 | 0.003 | 0.058 | 0.000 | 0.075 | 0.000 | 0.012 |
| DebbyRyan | 0.000 | 0.046 | 0.009 | 0.073 | 0.000 | 0.039 | 0.000 | 0.068 |
| Justine_Avery | 0.000 | 0.046 | 0.000 | 0.094 | 0.000 | 0.032 | 0.021 | 0.083 |
| wearegalantis | 0.000 | 0.047 | 0.005 | 0.008 | 0.000 | -0.010 | 0.000 | 0.051 |
| ClutchChairz | 0.006 | 0.047 | 0.000 | 0.010 | 0.000 | -0.002 | 0.000 | -0.001 |
| ninjasexparty | 0.000 | 0.047 | 0.000 | 0.010 | 0.000 | 0.006 | 0.000 | 0.072 |
| nickdiaz209 | 0.000 | 0.047 | 0.004 | 0.025 | 0.000 | 0.053 | 0.000 | 0.020 |
| DelMonteFresh | 0.000 | 0.047 | 0.000 | 0.044 | 0.000 | 0.022 | 0.000 | 0.030 |
| GuyCodes | 0.000 | 0.047 | 0.000 | 0.050 | 0.000 | 0.022 | 0.000 | 0.025 |
| ev | 0.000 | 0.047 | 0.000 | 0.053 | 0.000 | -0.002 | 0.000 | 0.077 |
| tweetbot | 0.000 | 0.047 | 0.000 | 0.059 | 0.000 | 0.022 | 0.000 | 0.087 |
| RL_Stine | 0.008 | 0.047 | 0.004 | 0.059 | 0.001 | 0.084 | 0.000 | 0.046 |
| SuperMeatBoy | 0.000 | 0.047 | 0.000 | 0.059 | 0.000 | 0.092 | 0.000 | 0.072 |
| mitchelmusso | 0.000 | 0.047 | 0.005 | 0.061 | 0.000 | 0.006 | 0.002 | 0.062 |
| Krystenritter | 0.000 | 0.047 | 0.000 | 0.064 | 0.000 | 0.084 | 0.000 | 0.056 |
| Tiyuri | 0.000 | 0.047 | 0.000 | 0.070 | 0.001 | 0.124 | 0.000 | 0.051 |
| summerbrennan | 0.000 | 0.047 | 0.000 | 0.073 | 0.000 | 0.006 | 0.000 | 0.067 |
| ParkerMolloy | 0.000 | 0.047 | 0.001 | 0.076 | 0.000 | 0.053 | 0.000 | 0.036 |
| KimKierkegaard | 0.000 | 0.047 | 0.000 | 0.035 | 0.000 | 0.015 | 0.000 | 0.009 |
| AlanTudyk | 0.019 | 0.047 | 0.005 | 0.040 | 0.000 | 0.055 | 0.000 | 0.040 |
| Slash | 0.000 | 0.047 | 0.017 | 0.091 | 0.000 | 0.082 | 0.000 | 0.088 |
| TheBatman | 0.000 | 0.047 | 0.001 | 0.007 | 0.000 | 0.044 | 0.001 | 0.012 |
| GreenManGaming | 0.000 | 0.047 | 0.000 | 0.050 | 0.000 | -0.004 | 0.012 | 0.019 |
| BadHombreNPS | 0.000 | 0.047 | 0.008 | 0.117 | 0.000 | 0.007 | 0.000 | 0.100 |
| FractalDesignNA | 0.000 | 0.047 | 0.000 | 0.016 | 0.000 | 0.012 | 0.000 | 0.085 |
| broadcity | 0.000 | 0.047 | 0.001 | 0.037 | 0.000 | -0.056 | 0.001 | 0.035 |
| JeffreeStar | 0.000 | 0.047 | 0.000 | 0.039 | 0.000 | 0.143 | 0.000 | 0.076 |
| shakira | 0.000 | 0.047 | 0.005 | 0.043 | 0.000 | -0.025 | 0.000 | 0.064 |
| hm | 0.001 | 0.047 | 0.000 | 0.084 | 0.000 | 0.069 | 0.000 | 0.006 |
| RickandMorty | 0.003 | 0.047 | 0.000 | 0.035 | 0.000 | 0.066 | 0.003 | 0.004 |
| KimDotcom | 0.000 | 0.048 | 0.000 | 0.004 | 0.000 | 0.034 | 0.007 | 0.039 |
| Outback | 0.000 | 0.048 | 0.000 | 0.042 | 0.000 | 0.010 | 0.000 | 0.008 |
| ASUSUSA | 0.000 | 0.048 | 0.000 | 0.001 | 0.000 | -0.040 | 0.000 | 0.003 |
| MikeTyson | 0.000 | 0.048 | 0.008 | 0.028 | 0.000 | 0.031 | 0.000 | 0.060 |
| nbcsnl | 0.000 | 0.048 | 0.000 | 0.088 | 0.000 | 0.045 | 0.000 | 0.113 |
| Sethrogen | 0.004 | 0.048 | 0.000 | 0.046 | 0.000 | 0.012 | 0.000 | 0.066 |
| SnoopDogg | 0.000 | 0.048 | 0.000 | 0.074 | 0.000 | 0.049 | 0.000 | 0.051 |
| EA | 0.000 | 0.048 | 0.000 | 0.030 | 0.001 | -0.025 | 0.002 | -0.016 |
| steveaustinBSR | 0.004 | 0.048 | 0.000 | 0.005 | 0.000 | -0.003 | 0.000 | -0.012 |
| CalvinHarris | 0.000 | 0.048 | 0.000 | 0.077 | 0.000 | 0.053 | 0.000 | 0.080 |
| DCComics | 0.000 | 0.049 | 0.000 | 0.031 | 0.000 | 0.093 | 0.000 | 0.044 |
| Mojang | 0.000 | 0.049 | 0.000 | 0.004 | 0.001 | 0.049 | 0.012 | 0.005 |
| BillGates | 0.000 | 0.049 | 0.003 | 0.010 | 0.000 | -0.015 | 0.000 | 0.030 |
| GetPerk | 0.000 | 0.049 | 0.000 | 0.047 | 0.000 | 0.035 | 0.000 | 0.009 |
| pgammo | 0.000 | 0.049 | 0.000 | -0.018 | 0.000 | 0.011 | 0.000 | 0.007 |
| UberHaxorNova | 0.000 | 0.049 | 0.000 | -0.005 | 0.000 | 0.032 | 0.000 | -0.022 |
| Disneyland | 0.008 | 0.049 | 0.000 | 0.016 | 0.000 | 0.011 | 0.000 | 0.002 |
| Bitstamp | 0.003 | 0.049 | 0.000 | 0.026 | 0.000 | 0.090 | 0.000 | 0.035 |
| hutchinson | 0.001 | 0.049 | 0.000 | 0.039 | 0.000 | 0.032 | 0.000 | 0.035 |
| forexposure_txt | 0.000 | 0.049 | 0.023 | 0.045 | 0.000 | 0.018 | 0.003 | 0.007 |
| NathanKress | 0.000 | 0.049 | 0.001 | 0.047 | 0.000 | 0.025 | 0.000 | 0.121 |
| MrT | 0.003 | 0.049 | 0.014 | 0.063 | 0.000 | 0.047 | 0.000 | 0.073 |
| Ebates | 0.000 | 0.049 | 0.001 | 0.083 | 0.000 | 0.047 | 0.000 | 0.073 |
| UncleRUSH | 0.000 | 0.049 | 0.018 | 0.091 | 0.001 | 0.097 | 0.000 | 0.073 |
| MomSpark | 0.003 | 0.049 | 0.000 | 0.102 | 0.000 | 0.068 | 0.002 | 0.002 |
| nihilist_arbys | 0.000 | 0.049 | 0.001 | 0.006 | 0.000 | -0.036 | 0.000 | 0.051 |
| noaheverett | 0.000 | 0.049 | 0.000 | -0.008 | 0.000 | -0.019 | 0.000 | 0.039 |
| EpicMealTime | 0.004 | 0.049 | 0.000 | 0.021 | 0.000 | 0.012 | 0.000 | 0.076 |
| madflavor | 0.000 | 0.049 | 0.000 | 0.032 | 0.000 | 0.087 | 0.000 | 0.027 |
| iamjamiefoxx | 0.000 | 0.049 | 0.000 | 0.055 | 0.001 | 0.050 | 0.000 | 0.043 |
| DrakeBell | 0.002 | 0.049 | 0.002 | 0.077 | 0.000 | 0.056 | 0.000 | 0.064 |
| thomyorke | 0.000 | 0.049 | 0.000 | 0.113 | 0.001 | 0.100 | 0.000 | 0.048 |
| donttrythis | 0.000 | 0.049 | 0.000 | 0.069 | 0.001 | 0.051 | 0.001 | 0.116 |
| MagnusCarlsen | 0.000 | 0.049 | 0.000 | -0.018 | 0.000 | -0.002 | 0.000 | -0.027 |
| Kappische | 0.000 | 0.049 | 0.000 | -0.015 | 0.000 | 0.014 | 0.000 | 0.087 |
| indiegamescom | 0.000 | 0.049 | 0.000 | -0.009 | 0.000 | 0.022 | 0.002 | 0.025 |
| Level1Techs | 0.000 | 0.049 | 0.000 | 0.016 | 0.000 | 0.022 | 0.000 | 0.041 |
| RogerCaneda | 0.000 | 0.049 | 0.002 | 0.022 | 0.000 | -0.033 | 0.000 | 0.046 |
| TreyTri | 0.000 | 0.049 | 0.000 | 0.022 | 0.000 | -0.033 | 0.012 | 0.046 |
| nasahqphoto | 0.000 | 0.049 | 0.000 | 0.022 | 0.000 | 0.045 | 0.000 | -0.001 |
| kevinbacon | 0.000 | 0.049 | 0.000 | 0.027 | 0.000 | 0.077 | 0.000 | 0.015 |
| MTVNews | 0.000 | 0.049 | 0.000 | 0.030 | 0.000 | 0.077 | 0.002 | 0.015 |
| MTVNEWS | 0.000 | 0.049 | 0.005 | 0.030 | 0.000 | 0.077 | 0.000 | 0.015 |
| theduckbrand | 0.026 | 0.049 | 0.009 | 0.033 | 0.000 | 0.061 | 0.000 | -0.001 |
| megynkelly | 0.000 | 0.049 | 0.000 | 0.042 | 0.000 | -0.010 | 0.007 | 0.041 |
| bathbodyworks | 0.000 | 0.049 | 0.000 | 0.044 | 0.000 | 0.045 | 0.000 | 0.020 |
| LiveMixtapes | 0.000 | 0.049 | 0.007 | 0.050 | 0.000 | -0.002 | 0.000 | 0.108 |
| grazeusa | 0.003 | 0.049 | 0.000 | 0.053 | 0.000 | 0.053 | 0.002 | -0.011 |
| violadavis | 0.000 | 0.049 | 0.002 | 0.059 | 0.000 | 0.006 | 0.000 | 0.025 |
| playasia | 0.001 | 0.049 | 0.000 | 0.073 | 0.000 | 0.037 | 0.001 | 0.098 |
| YesYoureRacist | 0.000 | 0.050 | 0.000 | 0.036 | 0.001 | -0.027 | 0.000 | -0.008 |
| cvspharmacy | 0.000 | 0.050 | 0.000 | 0.059 | 0.000 | 0.057 | 0.000 | 0.063 |
| dannypudi | 0.005 | 0.050 | 0.003 | 0.061 | 0.000 | 0.063 | 0.006 | 0.067 |
| id_824126001936474113 | 0.000 | 0.050 | 0.000 | 0.125 | 0.000 | 0.057 | 0.010 | 0.102 |
| EllenPage | 0.000 | 0.050 | 0.000 | 0.100 | 0.000 | 0.065 | 0.001 | 0.065 |
| AskAaronLee | 0.000 | 0.050 | 0.010 | 0.055 | 0.000 | 0.008 | 0.000 | -0.008 |
| MrsSOsbourne | 0.000 | 0.050 | 0.000 | 0.093 | 0.000 | 0.131 | 0.000 | 0.047 |
| adultswim | 0.006 | 0.050 | 0.000 | 0.033 | 0.002 | 0.070 | 0.000 | 0.065 |
| kathygriffin | 0.000 | 0.050 | 0.000 | 0.101 | 0.000 | 0.132 | 0.000 | 0.086 |
| theneedledrop | 0.000 | 0.050 | 0.003 | 0.048 | 0.000 | 0.055 | 0.005 | -0.021 |
| publichands | 0.007 | 0.051 | 0.036 | 0.127 | 0.000 | 0.028 | 0.000 | 0.103 |
| BarackObama | 0.052 | 0.051 | 0.043 | 0.063 | 0.000 | 0.015 | 0.000 | 0.019 |
| hardwick | 0.000 | 0.051 | 0.000 | 0.030 | 0.000 | 0.028 | 0.000 | 0.064 |
| aplusk | 0.002 | 0.051 | 0.000 | 0.095 | 0.000 | 0.089 | 0.000 | 0.077 |
| IvankaTrump | 0.000 | 0.051 | 0.000 | 0.067 | 0.000 | 0.092 | 0.000 | 0.047 |
| JoeyBats19 | 0.000 | 0.051 | 0.000 | -0.027 | 0.000 | 0.028 | 0.004 | -0.031 |
| CaptainSparklez | 0.000 | 0.051 | 0.000 | 0.040 | 0.000 | 0.048 | 0.000 | -0.070 |
| dorrismccomics | 0.000 | 0.051 | 0.034 | 0.057 | 0.000 | 0.015 | 0.000 | -0.013 |
| 20committee | 0.000 | 0.051 | 0.000 | 0.062 | 0.000 | 0.042 | 0.000 | 0.066 |
| atlasobscura | 0.000 | 0.051 | 0.000 | 0.064 | 0.000 | 0.062 | 0.000 | 0.070 |
| id_521593942 | 0.003 | 0.051 | 0.000 | 0.064 | 0.001 | 0.088 | 0.000 | 0.026 |
| WayneRooney | 0.009 | 0.051 | 0.000 | 0.069 | 0.000 | -0.038 | 0.012 | 0.110 |
| MoistCr1TiKaL | 0.000 | 0.052 | 0.000 | -0.002 | 0.001 | 0.019 | 0.000 | 0.031 |
| KEEMSTAR | 0.000 | 0.052 | 0.002 | 0.014 | 0.001 | 0.050 | 0.007 | -0.059 |
| rosemcgowan | 0.000 | 0.052 | 0.000 | 0.091 | 0.000 | 0.075 | 0.000 | 0.072 |
| lyft | 0.000 | 0.052 | 0.000 | -0.002 | 0.000 | -0.047 | 0.000 | 0.059 |
| Change | 0.008 | 0.052 | 0.001 | 0.008 | 0.000 | 0.032 | 0.000 | 0.026 |
| Stewie | 0.000 | 0.052 | 0.000 | 0.026 | 0.000 | 0.018 | 0.000 | 0.045 |
| reggiewatts | 0.000 | 0.052 | 0.000 | 0.032 | 0.000 | 0.011 | 0.000 | 0.030 |
| WorkaholicsCC | 0.000 | 0.052 | 0.000 | 0.037 | 0.000 | 0.025 | 0.000 | 0.049 |
| RichardEngel | 0.000 | 0.052 | 0.002 | 0.042 | 0.000 | 0.039 | 0.012 | 0.068 |
| ScottAdamsSays | 0.000 | 0.052 | 0.006 | 0.042 | 0.000 | 0.083 | 0.000 | -0.017 |
| AcaciaBrinley | 0.000 | 0.052 | 0.000 | 0.065 | 0.000 | -0.025 | 0.000 | 0.040 |
| KeyAndPeele | 0.000 | 0.052 | 0.000 | 0.068 | 0.000 | 0.061 | 0.000 | 0.064 |
| SenKamalaHarris | 0.001 | 0.052 | 0.006 | 0.087 | 0.000 | -0.013 | 0.000 | 0.012 |
| paulscheer | 0.000 | 0.052 | 0.000 | 0.039 | 0.000 | 0.036 | 0.000 | 0.065 |
| RegalMovies | 0.004 | 0.052 | 0.000 | 0.043 | 0.000 | -0.008 | 0.000 | 0.021 |
| SimonCowell | 0.000 | 0.052 | 0.001 | 0.071 | 0.000 | 0.025 | 0.000 | 0.073 |
| CespedesBBQ | 0.000 | 0.052 | 0.000 | -0.012 | 0.000 | 0.006 | 0.000 | -0.016 |
| demandprogress | 0.000 | 0.052 | 0.000 | 0.022 | 0.000 | 0.029 | 0.000 | 0.036 |
| LouyFierce | 0.001 | 0.052 | 0.000 | 0.025 | 0.000 | 0.006 | 0.000 | -0.032 |
| BradPaisley | 0.000 | 0.052 | 0.000 | 0.036 | 0.000 | 0.014 | 0.000 | 0.067 |
| NathanZed | 0.018 | 0.052 | 0.003 | 0.042 | 0.000 | 0.014 | 0.000 | 0.036 |
| THEGaryBusey | 0.002 | 0.052 | 0.000 | 0.047 | 0.000 | 0.037 | 0.000 | 0.098 |
| NASAGoddard | 0.000 | 0.052 | 0.000 | 0.059 | 0.000 | -0.002 | 0.000 | 0.015 |
| Chaosxsilencer | 0.000 | 0.052 | 0.000 | 0.076 | 0.000 | 0.022 | 0.000 | 0.030 |
| enriqueiglesias | 0.000 | 0.052 | 0.003 | 0.087 | 0.001 | 0.077 | 0.000 | 0.129 |
| iamcolinquinn | 0.000 | 0.052 | 0.000 | 0.090 | 0.000 | 0.132 | 0.000 | 0.056 |
| wilw | 0.008 | 0.053 | 0.000 | 0.059 | 0.000 | 0.017 | 0.013 | 0.086 |
| Arbys | 0.003 | 0.053 | 0.000 | 0.002 | 0.000 | 0.001 | 0.000 | -0.010 |
| EarnHoneydotcom | 0.000 | 0.053 | 0.003 | 0.036 | 0.000 | 0.017 | 0.000 | 0.040 |
| Influenster | 0.000 | 0.053 | 0.004 | 0.131 | 0.000 | 0.119 | 0.000 | 0.029 |
| BestBuy | 0.000 | 0.053 | 0.000 | 0.090 | 0.000 | 0.064 | 0.000 | 0.075 |
| bjnovak | 0.000 | 0.053 | 0.003 | 0.022 | 0.000 | 0.040 | 0.000 | 0.012 |
| ZacharyLevi | 0.003 | 0.053 | 0.006 | -0.005 | 0.000 | 0.020 | 0.000 | 0.013 |
| egoraptor | 0.007 | 0.053 | 0.000 | 0.006 | 0.000 | -0.005 | 0.000 | 0.003 |
| KevinSpacey | 0.000 | 0.053 | 0.000 | 0.088 | 0.000 | 0.086 | 0.002 | 0.090 |
| BoobsRadley | 0.000 | 0.054 | 0.000 | 0.014 | 0.000 | 0.012 | 0.000 | -0.026 |
| TripleH | 0.000 | 0.054 | 0.003 | 0.039 | 0.000 | -0.006 | 0.000 | 0.006 |
| victoriabeckham | 0.004 | 0.054 | 0.002 | 0.095 | 0.000 | 0.062 | 0.000 | 0.060 |
| bdunkelman | 0.000 | 0.054 | 0.000 | -0.008 | 0.000 | 0.028 | 0.000 | 0.048 |
| thelonelyisland | 0.000 | 0.054 | 0.000 | 0.050 | 0.001 | 0.048 | 0.000 | 0.070 |
| Chris_Meloni | 0.000 | 0.054 | 0.000 | 0.062 | 0.000 | 0.028 | 0.000 | 0.075 |
| AshBenzo | 0.000 | 0.054 | 0.000 | 0.064 | 0.000 | 0.015 | 0.000 | 0.053 |
| id_718495181914316801 | 0.000 | 0.054 | 0.000 | 0.071 | 0.000 | 0.015 | 0.000 | 0.070 |
| evanrachelwood | 0.000 | 0.054 | 0.000 | 0.083 | 0.000 | -0.018 | 0.000 | 0.048 |
| jennettemccurdy | 0.000 | 0.054 | 0.014 | 0.083 | 0.000 | 0.055 | 0.000 | 0.088 |
| SashaGrey | 0.000 | 0.054 | 0.016 | 0.095 | 0.002 | 0.075 | 0.006 | 0.090 |
| gofooji | 0.000 | 0.054 | 0.000 | 0.065 | 0.000 | 0.008 | 0.004 | 0.014 |
| Giveaway_Plus | 0.003 | 0.054 | 0.000 | 0.071 | 0.000 | 0.075 | 0.000 | 0.028 |
| baseballhall | 0.001 | 0.054 | 0.000 | -0.025 | 0.000 | 0.032 | 0.000 | -0.007 |
| WorldWideWob | 0.000 | 0.054 | 0.022 | 0.013 | 0.000 | 0.083 | 0.005 | 0.007 |
| MuscleNerd | 0.000 | 0.054 | 0.000 | 0.026 | 0.000 | -0.018 | 0.000 | 0.045 |
| mcspocky | 0.001 | 0.054 | 0.002 | 0.047 | 0.000 | -0.004 | 0.000 | 0.002 |
| souljaboy | 0.003 | 0.054 | 0.008 | 0.073 | 0.000 | -0.011 | 0.000 | 0.097 |
| id_824027211158130692 | 0.007 | 0.054 | 0.022 | 0.112 | 0.000 | 0.032 | 0.000 | 0.092 |
| vgdunkey | 0.000 | 0.055 | 0.000 | 0.009 | 0.000 | -0.002 | 0.008 | 0.003 |
| statcast | 0.000 | 0.055 | 0.000 | -0.007 | 0.000 | 0.022 | 0.002 | -0.006 |
| JaidenAnimation | 0.056 | 0.055 | 0.000 | -0.004 | 0.000 | -0.026 | 0.000 | -0.011 |
| stoya | 0.000 | 0.055 | 0.000 | 0.033 | 0.000 | 0.029 | 0.002 | 0.020 |
| gavinmikhail | 0.000 | 0.055 | 0.000 | 0.039 | 0.000 | -0.018 | 0.000 | -0.016 |
| connorfranta | 0.000 | 0.055 | 0.000 | 0.039 | 0.000 | 0.100 | 0.000 | -0.011 |
| carlyaquilino | 0.000 | 0.055 | 0.002 | 0.056 | 0.000 | -0.010 | 0.000 | 0.082 |
| dodomesticdad | 0.000 | 0.055 | 0.000 | 0.061 | 0.000 | 0.077 | 0.000 | -0.006 |
| 1capplegate | 0.002 | 0.055 | 0.000 | 0.067 | 0.000 | 0.108 | 0.000 | 0.051 |
| greenpeaceusa | 0.000 | 0.055 | 0.000 | 0.104 | 0.000 | 0.061 | 0.000 | 0.087 |
| Marvel | 0.000 | 0.056 | 0.005 | 0.047 | 0.000 | 0.048 | 0.002 | 0.056 |
| DjokerNole | 0.000 | 0.056 | 0.005 | 0.001 | 0.000 | -0.075 | 0.000 | -0.039 |
| harikondabolu | 0.000 | 0.056 | 0.000 | 0.082 | 0.000 | 0.025 | 0.000 | 0.031 |
| PerezHilton | 0.000 | 0.056 | 0.000 | 0.104 | 0.000 | 0.087 | 0.000 | 0.089 |
| BandaiNamcoUS | 0.000 | 0.056 | 0.000 | 0.006 | 0.001 | -0.001 | 0.000 | 0.016 |
| witchergame | 0.004 | 0.056 | 0.000 | 0.044 | 0.000 | 0.051 | 0.014 | 0.039 |
| SJBlahBlahBlog | 0.000 | 0.056 | 0.011 | 0.138 | 0.000 | 0.110 | 0.000 | 0.051 |
| HowardStern | 0.000 | 0.056 | 0.023 | 0.106 | 0.000 | 0.087 | 0.000 | 0.102 |
| htcvive | 0.000 | 0.056 | 0.000 | 0.043 | 0.000 | -0.005 | 0.000 | 0.088 |
| TVsAndyDaly | 0.000 | 0.056 | 0.000 | 0.055 | 0.000 | 0.075 | 0.000 | 0.044 |
| WBHomeEnt | 0.000 | 0.056 | 0.000 | 0.083 | 0.000 | 0.028 | 0.001 | 0.070 |
| id_824494641890394114 | 0.000 | 0.056 | 0.024 | 0.119 | 0.000 | 0.008 | 0.000 | 0.092 |
| GlennHowerton | 0.000 | 0.056 | 0.003 | 0.016 | 0.000 | 0.055 | 0.000 | 0.056 |
| BryanCranston | 0.036 | 0.057 | 0.016 | 0.048 | 0.001 | -0.009 | 0.000 | 0.012 |
| id_701658616839872517 | 0.000 | 0.057 | 0.000 | 0.006 | 0.000 | -0.032 | 0.020 | 0.049 |
| JamesWillems | 0.001 | 0.057 | 0.000 | 0.006 | 0.000 | 0.039 | 0.003 | -0.045 |
| rebeccasugar | 0.000 | 0.057 | 0.001 | 0.019 | 0.000 | -0.004 | 0.002 | 0.045 |
| BigGoodJohn | 0.000 | 0.057 | 0.000 | 0.047 | 0.000 | 0.004 | 0.000 | 0.026 |
| MirandaCosgrove | 0.000 | 0.057 | 0.000 | 0.081 | 0.000 | 0.054 | 0.000 | 0.092 |
| 50cent | 0.000 | 0.057 | 0.000 | 0.049 | 0.000 | 0.041 | 0.001 | 0.050 |
| SiriouslySusan | 0.003 | 0.057 | 0.000 | 0.059 | 0.000 | 0.044 | 0.000 | -0.002 |
| MarkRuffalo | 0.001 | 0.057 | 0.000 | 0.069 | 0.000 | 0.073 | 0.000 | 0.044 |
| shroud | 0.005 | 0.058 | 0.000 | -0.022 | 0.000 | -0.031 | 0.000 | 0.012 |
| jk_rowling | 0.000 | 0.058 | 0.000 | 0.084 | 0.000 | 0.004 | 0.000 | 0.033 |
| HamillHimself | 0.001 | 0.058 | 0.004 | 0.019 | 0.001 | 0.056 | 0.000 | 0.053 |
| MacMiller | 0.002 | 0.058 | 0.000 | 0.043 | 0.001 | -0.018 | 0.000 | 0.077 |
| LGUS | 0.029 | 0.058 | 0.003 | 0.039 | 0.000 | -0.010 | 0.003 | 0.067 |
| TeamLiquidLoL | 0.000 | 0.058 | 0.001 | 0.044 | 0.000 | 0.045 | 0.000 | 0.041 |
| rachaelray | 0.000 | 0.058 | 0.000 | 0.050 | 0.001 | 0.053 | 0.000 | 0.030 |
| Zachanner | 0.000 | 0.058 | 0.002 | 0.053 | 0.001 | 0.061 | 0.007 | 0.067 |
| IANMHARDING | 0.000 | 0.058 | 0.000 | 0.061 | 0.000 | 0.053 | 0.000 | 0.020 |
| BenefitBeauty | 0.000 | 0.058 | 0.000 | 0.064 | 0.001 | 0.116 | 0.000 | 0.046 |
| HaloTopCreamery | 0.000 | 0.058 | 0.000 | 0.067 | 0.000 | 0.037 | 0.000 | 0.072 |
| Pantene | 0.000 | 0.058 | 0.000 | 0.076 | 0.000 | 0.029 | 0.000 | 0.020 |
| TLC | 0.000 | 0.058 | 0.000 | 0.084 | 0.000 | 0.053 | 0.000 | 0.087 |
| JennyJohnsonHi5 | 0.000 | 0.058 | 0.000 | 0.084 | 0.000 | 0.061 | 0.000 | 0.072 |
| hrw | 0.000 | 0.058 | 0.000 | 0.107 | 0.001 | 0.132 | 0.008 | 0.082 |
| aboutamom | 0.006 | 0.058 | 0.000 | 0.118 | 0.000 | 0.108 | 0.000 | 0.056 |
| ThriftyJinxy | 0.000 | 0.058 | 0.012 | 0.118 | 0.003 | 0.108 | 0.000 | 0.056 |
| iamcardib | 0.000 | 0.058 | 0.000 | 0.045 | 0.000 | -0.007 | 0.002 | -0.041 |
| ElizabethBanks | 0.000 | 0.058 | 0.000 | 0.138 | 0.000 | 0.128 | 0.000 | 0.119 |
| OJessicaNigri | 0.008 | 0.058 | 0.000 | 0.063 | 0.000 | 0.028 | 0.000 | 0.070 |
| kevin_nealon | 0.000 | 0.058 | 0.011 | 0.076 | 0.000 | 0.116 | 0.000 | 0.067 |
| CallMeADuck | 0.000 | 0.058 | 0.000 | 0.089 | 0.000 | 0.075 | 0.000 | 0.067 |
| amazondeals | 0.000 | 0.058 | 0.000 | 0.065 | 0.000 | 0.054 | 0.000 | 0.075 |
| SophieT | 0.000 | 0.058 | 0.000 | 0.033 | 0.000 | 0.075 | 0.000 | 0.084 |
| lucyhale | 0.000 | 0.058 | 0.000 | 0.079 | 0.000 | 0.087 | 0.000 | 0.065 |
| TheAVClub | 0.000 | 0.058 | 0.005 | 0.037 | 0.000 | 0.012 | 0.000 | 0.048 |
| reddit | 0.005 | 0.058 | 0.000 | 0.034 | 0.001 | 0.053 | 0.011 | 0.097 |
| IanMcKellen | 0.000 | 0.058 | 0.000 | 0.114 | 0.002 | 0.124 | 0.000 | 0.060 |
| DAVID_LYNCH | 0.000 | 0.058 | 0.003 | 0.092 | 0.000 | 0.081 | 0.004 | 0.075 |
| GoDucks | 0.000 | 0.058 | 0.000 | 0.102 | 0.001 | 0.055 | 0.021 | 0.096 |
| kingsthings | 0.000 | 0.058 | 0.000 | 0.104 | 0.002 | 0.108 | 0.000 | 0.075 |
| twhiddleston | 0.000 | 0.059 | 0.026 | 0.073 | 0.000 | 0.065 | 0.000 | 0.044 |
| GamesDoneQuick | 0.011 | 0.059 | 0.002 | 0.014 | 0.000 | 0.035 | 0.000 | 0.000 |
| MrTonyHale | 0.000 | 0.059 | 0.000 | 0.067 | 0.000 | 0.028 | 0.000 | 0.044 |
| stevewoz | 0.000 | 0.059 | 0.000 | 0.067 | 0.000 | 0.075 | 0.008 | 0.075 |
| DarthVader | 0.000 | 0.059 | 0.000 | 0.098 | 0.000 | 0.035 | 0.000 | 0.053 |
| hitRECordJoe | 0.002 | 0.059 | 0.006 | 0.093 | 0.000 | 0.049 | 0.000 | 0.040 |
| neilhimself | 0.002 | 0.059 | 0.001 | 0.071 | 0.000 | 0.092 | 0.000 | 0.063 |
| Evan_McMullin | 0.000 | 0.059 | 0.009 | 0.096 | 0.000 | 0.058 | 0.000 | 0.092 |
| cthagod | 0.000 | 0.059 | 0.000 | 0.034 | 0.000 | 0.025 | 0.000 | 0.030 |
| waltmossberg | 0.000 | 0.059 | 0.009 | 0.050 | 0.000 | 0.075 | 0.000 | 0.064 |
| tekwendell | 0.000 | 0.059 | 0.000 | 0.052 | 0.000 | 0.061 | 0.000 | 0.068 |
| PapaJohns | 0.000 | 0.059 | 0.000 | 0.065 | 0.000 | 0.004 | 0.000 | 0.068 |
| SweetiesSweeps | 0.000 | 0.059 | 0.000 | 0.068 | 0.000 | 0.025 | 0.001 | 0.054 |
| BookGorilla | 0.000 | 0.059 | 0.000 | 0.068 | 0.000 | 0.075 | 0.000 | 0.016 |
| JimSterling | 0.000 | 0.059 | 0.002 | 0.070 | 0.000 | 0.032 | 0.001 | 0.045 |
| goodreads | 0.000 | 0.059 | 0.008 | 0.083 | 0.000 | 0.068 | 0.000 | 0.059 |
| OfficialKat | 0.000 | 0.059 | 0.002 | 0.096 | 0.000 | 0.068 | 0.000 | 0.083 |
| lomargie | 0.000 | 0.059 | 0.020 | 0.109 | 0.000 | 0.097 | 0.000 | 0.002 |
| TMZ | 0.017 | 0.060 | 0.000 | 0.071 | 0.000 | 0.069 | 0.003 | 0.056 |
| SUBWAY | 0.000 | 0.060 | 0.000 | 0.080 | 0.000 | 0.008 | 0.000 | 0.053 |
| Omundson | 0.000 | 0.060 | 0.001 | 0.053 | 0.000 | 0.087 | 0.000 | 0.021 |
| michaelianblack | 0.001 | 0.060 | 0.001 | 0.151 | 0.000 | 0.116 | 0.000 | 0.096 |
| rogerhamilton | 0.000 | 0.061 | 0.000 | 0.025 | 0.000 | 0.031 | 0.000 | -0.014 |
| FinalFantasy | 0.000 | 0.061 | 0.001 | 0.055 | 0.000 | -0.019 | 0.000 | 0.072 |
| _juliannemoore | 0.002 | 0.061 | 0.000 | 0.057 | 0.000 | 0.037 | 0.000 | 0.002 |
| realmikefox | 0.000 | 0.061 | 0.000 | 0.070 | 0.000 | 0.025 | 0.002 | 0.060 |
| systemofadown | 0.001 | 0.061 | 0.000 | 0.077 | 0.000 | 0.037 | 0.000 | 0.064 |
| perlmutations | 0.000 | 0.061 | 0.000 | 0.082 | 0.000 | 0.106 | 0.007 | 0.072 |
| MariahCarey | 0.000 | 0.061 | 0.000 | 0.091 | 0.000 | 0.093 | 0.000 | 0.097 |
| thinkprogress | 0.007 | 0.061 | 0.000 | 0.120 | 0.000 | 0.075 | 0.000 | 0.097 |
| TheSteinLine | 0.000 | 0.061 | 0.000 | 0.047 | 0.000 | -0.020 | 0.000 | -0.014 |
| TheNotoriousMMA | 0.014 | 0.061 | 0.002 | 0.051 | 0.000 | 0.040 | 0.000 | 0.000 |
| baseball_ref | 0.000 | 0.061 | 0.000 | -0.004 | 0.000 | 0.014 | 0.000 | 0.020 |
| RewardingWays | 0.000 | 0.061 | 0.000 | 0.019 | 0.000 | 0.014 | 0.000 | 0.015 |
| unlimapps | 0.000 | 0.061 | 0.000 | 0.025 | 0.000 | 0.014 | 0.000 | 0.093 |
| shanesmith30 | 0.000 | 0.061 | 0.009 | 0.030 | 0.000 | 0.029 | 0.000 | 0.077 |
| 1jordanbell | 0.002 | 0.061 | 0.002 | 0.033 | 0.000 | -0.026 | 0.024 | 0.113 |
| motherboard | 0.000 | 0.061 | 0.000 | 0.039 | 0.000 | 0.037 | 0.000 | 0.025 |
| cammipham | 0.003 | 0.061 | 0.000 | 0.042 | 0.000 | 0.029 | 0.000 | -0.001 |
| CobraCommander | 0.000 | 0.061 | 0.000 | 0.042 | 0.000 | 0.045 | 0.000 | 0.051 |
| KeetPotato | 0.003 | 0.061 | 0.000 | 0.044 | 0.000 | 0.084 | 0.000 | -0.011 |
| planetbeing | 0.000 | 0.061 | 0.012 | 0.056 | 0.000 | -0.010 | 0.003 | 0.072 |
| voxdotcom | 0.000 | 0.061 | 0.000 | 0.061 | 0.000 | 0.029 | 0.000 | 0.036 |
| everycolorbot | 0.000 | 0.061 | 0.000 | 0.061 | 0.000 | 0.100 | 0.000 | 0.056 |
| greggrunberg | 0.000 | 0.061 | 0.000 | 0.093 | 0.000 | 0.053 | 0.000 | 0.103 |
| FIRE_THE_FOOL | 0.000 | 0.061 | 0.000 | 0.141 | 0.000 | 0.053 | 0.000 | 0.082 |
| SteveMartinToGo | 0.000 | 0.061 | 0.000 | 0.066 | 0.000 | 0.046 | 0.000 | 0.081 |
| TwitPic | 0.000 | 0.061 | 0.000 | 0.016 | 0.000 | 0.023 | 0.000 | 0.076 |
| ESPNCFB | 0.002 | 0.061 | 0.000 | 0.018 | 0.000 | 0.087 | 0.000 | 0.044 |
| jarpad | 0.001 | 0.061 | 0.000 | 0.073 | 0.000 | 0.068 | 0.000 | 0.018 |
| alwayssunny | 0.000 | 0.061 | 0.005 | 0.050 | 0.001 | 0.075 | 0.004 | 0.009 |
| mikeshinoda | 0.006 | 0.061 | 0.000 | 0.081 | 0.000 | 0.068 | 0.000 | 0.057 |
| kellystilwell | 0.000 | 0.061 | 0.000 | 0.129 | 0.000 | 0.068 | 0.000 | 0.009 |
| WilliamShatner | 0.000 | 0.061 | 0.000 | 0.083 | 0.000 | 0.137 | 0.000 | 0.071 |
| EVO | 0.000 | 0.062 | 0.003 | -0.020 | 0.000 | 0.068 | 0.000 | 0.064 |
| aparnapkin | 0.000 | 0.062 | 0.000 | 0.034 | 0.000 | -0.011 | 0.000 | -0.026 |
| anamariecox | 0.006 | 0.062 | 0.000 | 0.039 | 0.000 | -0.011 | 0.000 | 0.064 |
| BRANDONWARDELL | 0.007 | 0.062 | 0.000 | 0.052 | 0.000 | 0.047 | 0.000 | 0.087 |
| JaredLeto | 0.000 | 0.062 | 0.000 | 0.089 | 0.000 | 0.118 | 0.000 | 0.073 |
| MaddowBlog | 0.000 | 0.062 | 0.002 | 0.025 | 0.000 | 0.017 | 0.000 | 0.015 |
| DRUNKHULK | 0.000 | 0.062 | 0.006 | 0.094 | 0.000 | 0.055 | 0.000 | 0.100 |
| Spruke | 0.000 | 0.062 | 0.000 | 0.044 | 0.001 | 0.051 | 0.000 | -0.023 |
| ipsy | 0.002 | 0.062 | 0.010 | 0.057 | 0.000 | 0.093 | 0.000 | 0.051 |
| ADAMDEVINE | 0.000 | 0.063 | 0.000 | 0.058 | 0.000 | -0.001 | 0.000 | 0.053 |
| DWAnimation | 0.002 | 0.063 | 0.000 | 0.001 | 0.000 | -0.037 | 0.007 | -0.002 |
| nicolerichie | 0.000 | 0.063 | 0.000 | 0.113 | 0.000 | 0.106 | 0.000 | 0.122 |
| MKBHD | 0.000 | 0.063 | 0.004 | 0.002 | 0.000 | -0.023 | 0.001 | -0.024 |
| ashly_burch | 0.000 | 0.063 | 0.000 | 0.050 | 0.000 | 0.015 | 0.000 | 0.044 |
| SleepintheGardn | 0.000 | 0.063 | 0.000 | 0.057 | 0.000 | 0.042 | 0.000 | 0.057 |
| RobertKirkman | 0.000 | 0.063 | 0.007 | 0.071 | 0.000 | 0.055 | 0.010 | 0.092 |
| CurseGamepedia | 0.000 | 0.064 | 0.004 | -0.029 | 0.000 | -0.049 | 0.018 | 0.087 |
| RicFlairNatrBoy | 0.000 | 0.064 | 0.000 | 0.019 | 0.000 | -0.002 | 0.000 | 0.010 |
| GameDebate | 0.007 | 0.064 | 0.000 | 0.022 | 0.000 | -0.026 | 0.000 | 0.056 |
| David_Boreanaz | 0.000 | 0.064 | 0.000 | 0.050 | 0.000 | 0.061 | 0.000 | 0.056 |
| kevinpollak | 0.000 | 0.064 | 0.000 | 0.064 | 0.000 | 0.084 | 0.000 | 0.067 |
| LizGillies | 0.000 | 0.064 | 0.000 | 0.070 | 0.000 | 0.045 | 0.000 | 0.056 |
| larryelder | 0.000 | 0.064 | 0.000 | 0.070 | 0.000 | 0.061 | 0.001 | 0.051 |
| HISTORY | 0.002 | 0.064 | 0.000 | 0.073 | 0.000 | 0.084 | 0.000 | -0.001 |
| dinade | 0.000 | 0.064 | 0.000 | 0.104 | 0.000 | 0.053 | 0.000 | 0.041 |
| rainnwilson | 0.005 | 0.064 | 0.000 | 0.054 | 0.000 | 0.061 | 0.000 | 0.045 |
| rafflecopter | 0.000 | 0.064 | 0.064 | 0.131 | 0.000 | 0.080 | 0.000 | 0.062 |
| ComedyCentral | 0.000 | 0.064 | 0.004 | 0.057 | 0.000 | 0.135 | 0.000 | 0.050 |
| mishacollins | 0.010 | 0.064 | 0.018 | 0.069 | 0.000 | 0.055 | 0.000 | 0.029 |
| VictoriasSecret | 0.003 | 0.064 | 0.000 | 0.073 | 0.000 | 0.028 | 0.000 | 0.022 |
| yokoono | 0.019 | 0.064 | 0.000 | 0.088 | 0.000 | 0.055 | 0.000 | 0.061 |
| burnie | 0.012 | 0.064 | 0.000 | 0.003 | 0.000 | 0.036 | 0.000 | 0.010 |
| chelseaperetti | 0.001 | 0.064 | 0.000 | 0.101 | 0.000 | 0.092 | 0.000 | 0.058 |
| radiohead | 0.000 | 0.064 | 0.000 | 0.097 | 0.000 | 0.082 | 0.000 | 0.054 |
| mulaney | 0.000 | 0.064 | 0.000 | 0.091 | 0.000 | 0.064 | 0.000 | 0.059 |
| FNATIC | 0.000 | 0.065 | 0.000 | 0.025 | 0.000 | 0.022 | 0.000 | 0.055 |
| PauleyP | 0.000 | 0.065 | 0.000 | 0.036 | 0.000 | 0.069 | 0.015 | 0.036 |
| FunhausTeam | 0.000 | 0.065 | 0.000 | 0.006 | 0.000 | 0.047 | 0.000 | -0.022 |
| TempoReynad | 0.000 | 0.065 | 0.000 | 0.013 | 0.000 | -0.011 | 0.002 | 0.035 |
| BobbiBrown | 0.000 | 0.065 | 0.000 | 0.078 | 0.000 | 0.083 | 0.000 | 0.021 |
| SouthPark | 0.000 | 0.065 | 0.000 | 0.009 | 0.000 | 0.059 | 0.000 | 0.072 |
| JamesGunn | 0.006 | 0.065 | 0.000 | -0.042 | 0.000 | 0.056 | 0.004 | 0.027 |
| SwagCodezAlertz | 0.000 | 0.065 | 0.000 | 0.007 | 0.000 | 0.006 | 0.000 | 0.002 |
| didyouknowgamin | 0.000 | 0.065 | 0.000 | 0.034 | 0.001 | 0.050 | 0.010 | 0.039 |
| FLOTUS44 | 0.000 | 0.066 | 0.006 | 0.037 | 0.000 | -0.051 | 0.000 | -0.007 |
| IMKristenBell | 0.000 | 0.066 | 0.000 | 0.097 | 0.000 | 0.055 | 0.000 | 0.079 |
| UnboxTherapy | 0.000 | 0.066 | 0.001 | 0.036 | 0.001 | -0.063 | 0.001 | 0.012 |
| Complex | 0.000 | 0.066 | 0.000 | 0.052 | 0.000 | 0.087 | 0.000 | 0.068 |
| DemetriMartin | 0.011 | 0.066 | 0.000 | 0.032 | 0.000 | 0.077 | 0.000 | 0.054 |
| pinchme | 0.000 | 0.066 | 0.001 | 0.043 | 0.000 | 0.066 | 0.000 | -0.024 |
| n0thing | 0.000 | 0.066 | 0.000 | 0.013 | 0.000 | -0.014 | 0.000 | 0.058 |
| IGLOOGHOST | 0.000 | 0.066 | 0.000 | 0.022 | 0.000 | 0.037 | 0.000 | 0.004 |
| timehop | 0.000 | 0.066 | 0.000 | 0.036 | 0.000 | 0.077 | 0.000 | 0.056 |
| drdre | 0.000 | 0.066 | 0.002 | 0.044 | 0.000 | 0.037 | 0.001 | 0.082 |
| thatbaldchick | 0.000 | 0.066 | 0.040 | 0.047 | 0.002 | 0.022 | 0.000 | 0.015 |
| Arackybrand | 0.000 | 0.066 | 0.000 | 0.053 | 0.000 | 0.100 | 0.000 | 0.015 |
| JohnScarce | 0.000 | 0.066 | 0.004 | 0.059 | 0.000 | 0.037 | 0.000 | 0.004 |
| RashisTVUgly | 0.000 | 0.066 | 0.000 | 0.067 | 0.000 | 0.069 | 0.000 | 0.093 |
| darcibean | 0.022 | 0.066 | 0.018 | 0.081 | 0.000 | 0.069 | 0.000 | 0.036 |
| benandjerrys | 0.001 | 0.066 | 0.002 | 0.084 | 0.000 | 0.108 | 0.000 | 0.046 |
| mmbear5 | 0.000 | 0.066 | 0.000 | 0.118 | 0.000 | 0.108 | 0.000 | 0.030 |
| Weidknecht | 0.000 | 0.066 | 0.000 | 0.118 | 0.000 | 0.108 | 0.000 | 0.030 |
| brokeymcpoverty | 0.003 | 0.066 | 0.000 | 0.127 | 0.000 | 0.092 | 0.000 | 0.108 |
| ESL | 0.000 | 0.067 | 0.000 | 0.010 | 0.000 | -0.017 | 0.000 | 0.108 |
| RyanSeacrest | 0.000 | 0.067 | 0.000 | 0.136 | 0.000 | 0.139 | 0.000 | 0.065 |
| h3h3productions | 0.000 | 0.067 | 0.000 | 0.044 | 0.000 | 0.043 | 0.003 | 0.030 |
| OfficialJLD | 0.000 | 0.067 | 0.000 | 0.059 | 0.000 | 0.040 | 0.000 | 0.012 |
| MattMcGorry | 0.000 | 0.067 | 0.001 | 0.032 | 0.000 | 0.039 | 0.001 | 0.007 |
| lights | 0.001 | 0.067 | 0.000 | 0.034 | 0.000 | 0.032 | 0.000 | 0.097 |
| tldtoday | 0.009 | 0.067 | 0.013 | 0.042 | 0.000 | -0.018 | 0.000 | 0.021 |
| SYFY | 0.000 | 0.067 | 0.000 | 0.047 | 0.000 | 0.039 | 0.000 | 0.045 |
| jimmyjohns | 0.003 | 0.067 | 0.000 | 0.058 | 0.000 | 0.025 | 0.000 | 0.073 |
| CokeZero | 0.000 | 0.067 | 0.000 | 0.063 | 0.000 | 0.039 | 0.000 | -0.007 |
| maureenjohnson | 0.009 | 0.067 | 0.001 | 0.070 | 0.000 | 0.025 | 0.000 | 0.087 |
| billiejoe | 0.003 | 0.067 | 0.000 | 0.073 | 0.001 | 0.047 | 0.000 | 0.064 |
| mdefined | 0.001 | 0.067 | 0.000 | 0.086 | 0.000 | 0.047 | 0.000 | -0.007 |
| dawnchats | 0.000 | 0.067 | 0.027 | 0.133 | 0.000 | 0.097 | 0.000 | 0.016 |
| mamasmoney | 0.000 | 0.067 | 0.000 | 0.143 | 0.000 | 0.090 | 0.001 | 0.040 |
| Dinnerbone | 0.000 | 0.067 | 0.016 | -0.024 | 0.000 | -0.019 | 0.004 | -0.006 |
| IAMQUEENLATIFAH | 0.000 | 0.067 | 0.000 | 0.046 | 0.000 | 0.056 | 0.000 | 0.060 |
| nypost | 0.000 | 0.067 | 0.000 | 0.048 | 0.000 | 0.069 | 0.003 | 0.052 |
| Timcast | 0.017 | 0.067 | 0.000 | 0.064 | 0.000 | 0.050 | 0.000 | 0.039 |
| id_109065990 | 0.000 | 0.067 | 0.001 | 0.070 | 0.000 | 0.093 | 0.006 | 0.019 |
| jessicaalba | 0.000 | 0.068 | 0.000 | 0.093 | 0.000 | 0.066 | 0.000 | 0.077 |
| bioware | 0.022 | 0.068 | 0.000 | 0.085 | 0.000 | 0.082 | 0.002 | 0.005 |
| icecube | 0.000 | 0.068 | 0.000 | -0.028 | 0.000 | 0.026 | 0.002 | 0.056 |
| ringostarrmusic | 0.000 | 0.068 | 0.000 | 0.057 | 0.000 | 0.048 | 0.001 | 0.044 |
| DaRealAmberRose | 0.021 | 0.068 | 0.000 | 0.057 | 0.000 | 0.121 | 0.000 | 0.044 |
| Terraria_Logic | 0.000 | 0.068 | 0.031 | 0.074 | 0.001 | 0.095 | 0.024 | 0.083 |
| ultabeauty | 0.000 | 0.068 | 0.000 | 0.093 | 0.001 | 0.108 | 0.000 | 0.075 |
| billmaher | 0.000 | 0.068 | 0.001 | 0.074 | 0.000 | 0.080 | 0.000 | 0.062 |
| RealTracyMorgan | 0.000 | 0.069 | 0.000 | 0.108 | 0.000 | 0.071 | 0.000 | 0.059 |
| jennafischer | 0.000 | 0.069 | 0.001 | 0.044 | 0.000 | 0.021 | 0.007 | -0.035 |
| BulldogBeing | 0.000 | 0.069 | 0.000 | 0.005 | 0.000 | 0.037 | 0.000 | 0.015 |
| rosariodawson | 0.000 | 0.069 | 0.000 | 0.022 | 0.000 | 0.037 | 0.002 | 0.041 |
| EugeneMirman | 0.000 | 0.069 | 0.000 | 0.042 | 0.000 | -0.002 | 0.000 | 0.036 |
| LiaMarieJohnson | 0.000 | 0.069 | 0.000 | 0.042 | 0.000 | 0.022 | 0.000 | 0.051 |
| id_715198343001952259 | 0.000 | 0.069 | 0.003 | 0.047 | 0.000 | 0.053 | 0.001 | 0.025 |
| David_Leavitt | 0.000 | 0.069 | 0.002 | 0.050 | 0.000 | 0.037 | 0.000 | 0.093 |
| chanelwestcoast | 0.000 | 0.069 | 0.007 | 0.050 | 0.000 | 0.061 | 0.000 | 0.087 |
| CadeRageous | 0.009 | 0.069 | 0.007 | 0.056 | 0.001 | 0.092 | 0.000 | 0.004 |
| Machinima | 0.000 | 0.069 | 0.000 | 0.056 | 0.000 | 0.092 | 0.000 | 0.056 |
| LAHWF | 0.000 | 0.069 | 0.000 | 0.070 | 0.000 | 0.029 | 0.000 | 0.062 |
| PlayLucktastic | 0.000 | 0.069 | 0.005 | 0.070 | 0.002 | 0.077 | 0.000 | 0.051 |
| PinkNinjaBlogg | 0.000 | 0.069 | 0.000 | 0.098 | 0.001 | 0.092 | 0.000 | 0.046 |
| farmstarliving | 0.019 | 0.069 | 0.000 | 0.115 | 0.000 | 0.100 | 0.000 | 0.108 |
| SirPatStew | 0.004 | 0.069 | 0.011 | 0.081 | 0.000 | 0.095 | 0.000 | 0.054 |
| seanhannity | 0.008 | 0.069 | 0.000 | 0.014 | 0.000 | 0.037 | 0.000 | 0.027 |
| LILUZIVERT | 0.000 | 0.069 | 0.001 | 0.050 | 0.000 | 0.100 | 0.000 | 0.060 |
| JustinVerlander | 0.000 | 0.070 | 0.000 | 0.024 | 0.000 | 0.039 | 0.000 | -0.003 |
| eBay | 0.000 | 0.070 | 0.000 | 0.065 | 0.000 | 0.047 | 0.000 | 0.035 |
| OregonPitCrew | 0.033 | 0.070 | 0.000 | 0.076 | 0.000 | 0.039 | 0.000 | 0.054 |
| gaynycdad | 0.001 | 0.070 | 0.000 | 0.122 | 0.000 | 0.054 | 0.000 | 0.007 |
| OriginalFunko | 0.000 | 0.070 | 0.000 | 0.089 | 0.000 | 0.038 | 0.000 | 0.024 |
| AMCTheatres | 0.011 | 0.070 | 0.000 | 0.065 | 0.000 | 0.012 | 0.000 | 0.057 |
| JHarden13 | 0.033 | 0.070 | 0.000 | 0.067 | 0.000 | 0.070 | 0.000 | 0.051 |
| jackfrags | 0.000 | 0.071 | 0.000 | 0.047 | 0.000 | 0.028 | 0.000 | 0.040 |
| Sadieisonfire | 0.000 | 0.071 | 0.000 | 0.052 | 0.000 | 0.062 | 0.000 | 0.048 |
| turkopticon | 0.034 | 0.071 | 0.005 | 0.081 | 0.000 | 0.042 | 0.002 | 0.110 |
| daxshepard | 0.005 | 0.071 | 0.000 | 0.088 | 0.000 | 0.022 | 0.000 | 0.053 |
| paulwesley | 0.000 | 0.071 | 0.000 | 0.107 | 0.000 | 0.082 | 0.000 | 0.088 |
| simplystacienet | 0.000 | 0.071 | 0.000 | 0.110 | 0.000 | 0.088 | 0.000 | 0.018 |
| ijustine | 0.008 | 0.071 | 0.000 | 0.048 | 0.000 | 0.022 | 0.000 | 0.055 |
| FilthyFrank | 0.000 | 0.071 | 0.009 | 0.076 | 0.001 | 0.069 | 0.001 | 0.078 |
| JustinMcElroy | 0.000 | 0.071 | 0.007 | 0.106 | 0.000 | 0.057 | 0.006 | 0.047 |
| id_823565852922576897 | 0.005 | 0.072 | 0.000 | 0.156 | 0.000 | 0.031 | 0.008 | 0.122 |
| DannyDeVito | 0.000 | 0.072 | 0.000 | 0.076 | 0.000 | 0.096 | 0.001 | 0.072 |
| elizadushku | 0.000 | 0.072 | 0.001 | 0.042 | 0.000 | 0.044 | 0.000 | 0.082 |
| DanielNewman | 0.006 | 0.072 | 0.006 | 0.067 | 0.000 | 0.077 | 0.009 | 0.077 |
| EsquireNetwork | 0.000 | 0.072 | 0.000 | 0.101 | 0.000 | 0.092 | 0.000 | 0.056 |
| mommymatter | 0.083 | 0.072 | 0.000 | 0.112 | 0.000 | 0.092 | 0.000 | 0.025 |
| id_824797212425191425 | 0.000 | 0.072 | 0.038 | 0.115 | 0.000 | 0.077 | 0.001 | 0.113 |
| EricTrump | 0.000 | 0.072 | 0.000 | 0.045 | 0.000 | 0.104 | 0.000 | 0.045 |
| donald_faison | 0.000 | 0.072 | 0.002 | 0.047 | 0.000 | 0.104 | 0.000 | 0.078 |
| howiemandel | 0.003 | 0.072 | 0.000 | 0.109 | 0.000 | 0.068 | 0.000 | 0.087 |
| JustinTrudeau | 0.000 | 0.073 | 0.000 | 0.104 | 0.000 | 0.074 | 0.000 | 0.065 |
| MarsCuriosity | 0.000 | 0.073 | 0.005 | 0.069 | 0.000 | 0.010 | 0.000 | 0.042 |
| HilaKleinH3 | 0.000 | 0.073 | 0.005 | 0.045 | 0.000 | 0.046 | 0.001 | 0.029 |
| listia | 0.000 | 0.073 | 0.000 | 0.023 | 0.000 | 0.046 | 0.000 | 0.012 |
| csydelko | 0.000 | 0.073 | 0.000 | 0.087 | 0.000 | 0.034 | 0.000 | -0.031 |
| peteholmes | 0.000 | 0.073 | 0.000 | 0.019 | 0.000 | 0.028 | 0.000 | 0.009 |
| THR | 0.002 | 0.073 | 0.000 | 0.023 | 0.001 | 0.048 | 0.002 | 0.053 |
| warrenellis | 0.000 | 0.073 | 0.000 | 0.057 | 0.000 | 0.088 | 0.004 | 0.097 |
| DollyParton | 0.000 | 0.073 | 0.000 | 0.081 | 0.000 | 0.035 | 0.000 | 0.088 |
| ConservamomE | 0.000 | 0.073 | 0.000 | 0.160 | 0.000 | 0.135 | 0.000 | 0.066 |
| dylansprouse | 0.000 | 0.073 | 0.002 | 0.030 | 0.000 | 0.027 | 0.000 | -0.017 |
| nick_colletti | 0.000 | 0.074 | 0.001 | 0.111 | 0.000 | 0.097 | 0.000 | 0.104 |
| bouska | 0.000 | 0.074 | 0.000 | 0.050 | 0.000 | 0.012 | 0.000 | 0.015 |
| DavidKHarbour | 0.013 | 0.074 | 0.000 | 0.064 | 0.000 | 0.019 | 0.007 | 0.101 |
| id_824320219866923018 | 0.000 | 0.074 | 0.006 | 0.139 | 0.000 | 0.082 | 0.001 | 0.085 |
| Pokemon | 0.016 | 0.074 | 0.012 | 0.072 | 0.000 | 0.067 | 0.000 | 0.008 |
| Sephora | 0.014 | 0.074 | 0.010 | 0.061 | 0.000 | 0.070 | 0.000 | 0.058 |
| CapcomUSA_ | 0.000 | 0.074 | 0.000 | 0.075 | 0.000 | 0.092 | 0.000 | 0.117 |
| alispagnola | 0.000 | 0.074 | 0.007 | 0.089 | 0.000 | 0.103 | 0.000 | 0.046 |
| benlandis | 0.000 | 0.075 | 0.000 | 0.062 | 0.000 | 0.044 | 0.000 | -0.009 |
| G2shox | 0.000 | 0.075 | 0.001 | 0.016 | 0.000 | -0.010 | 0.000 | 0.041 |
| olofmeister | 0.000 | 0.075 | 0.000 | 0.016 | 0.000 | -0.010 | 0.000 | 0.041 |
| EpicGames | 0.000 | 0.075 | 0.000 | 0.064 | 0.000 | 0.084 | 0.004 | 0.051 |
| ben_mckenzie | 0.000 | 0.075 | 0.003 | 0.081 | 0.000 | 0.108 | 0.000 | 0.051 |
| BUYDIG | 0.001 | 0.075 | 0.000 | 0.084 | 0.000 | 0.077 | 0.000 | 0.020 |
| Carmex | 0.000 | 0.075 | 0.000 | 0.104 | 0.000 | 0.092 | 0.000 | 0.010 |
| BusyMomofTwins1 | 0.033 | 0.075 | 0.000 | 0.124 | 0.000 | 0.100 | 0.000 | 0.020 |
| adamkovic | 0.004 | 0.075 | 0.000 | 0.034 | 0.000 | 0.039 | 0.000 | -0.050 |
| Sips_ | 0.004 | 0.075 | 0.000 | 0.037 | 0.001 | 0.011 | 0.000 | -0.055 |
| id_894748894789115907 | 0.000 | 0.075 | 0.000 | 0.052 | 0.000 | 0.083 | 0.000 | -0.007 |
| ava | 0.000 | 0.075 | 0.000 | 0.068 | 0.000 | 0.011 | 0.000 | 0.049 |
| xeni | 0.007 | 0.075 | 0.000 | 0.068 | 0.000 | 0.075 | 0.000 | 0.030 |
| DrOz | 0.000 | 0.075 | 0.000 | 0.083 | 0.000 | 0.075 | 0.001 | 0.102 |
| ToysRUs | 0.000 | 0.075 | 0.000 | 0.138 | 0.000 | 0.126 | 0.000 | 0.111 |
| Kohls | 0.000 | 0.075 | 0.000 | 0.115 | 0.000 | 0.145 | 0.000 | 0.078 |
| DRUDGE | 0.000 | 0.075 | 0.000 | 0.019 | 0.000 | 0.046 | 0.008 | 0.036 |
| RealGDT | 0.000 | 0.075 | 0.000 | 0.065 | 0.003 | 0.069 | 0.000 | 0.070 |
| arielhelwani | 0.000 | 0.075 | 0.004 | 0.055 | 0.000 | 0.068 | 0.001 | 0.031 |
| pod2g | 0.000 | 0.075 | 0.000 | 0.076 | 0.000 | 0.022 | 0.000 | 0.044 |
| serenawilliams | 0.014 | 0.075 | 0.000 | 0.091 | 0.000 | 0.008 | 0.000 | 0.070 |
| Malala | 0.004 | 0.076 | 0.001 | 0.111 | 0.000 | 0.076 | 0.000 | 0.043 |
| Ska | 0.000 | 0.076 | 0.000 | 0.028 | 0.000 | 0.019 | 0.000 | 0.085 |
| SanDisk | 0.000 | 0.076 | 0.000 | 0.057 | 0.000 | 0.075 | 0.000 | -0.002 |
| EAStarWars | 0.000 | 0.076 | 0.000 | 0.093 | 0.000 | 0.037 | 0.000 | 0.056 |
| Borderlands | 0.000 | 0.076 | 0.000 | 0.043 | 0.001 | -0.020 | 0.000 | 0.040 |
| ChrisEvans | 0.000 | 0.077 | 0.000 | 0.067 | 0.000 | 0.081 | 0.000 | 0.026 |
| TheRealBuzz | 0.002 | 0.077 | 0.000 | 0.019 | 0.000 | 0.039 | 0.000 | -0.007 |
| cocacolarewards | 0.000 | 0.077 | 0.006 | 0.060 | 0.000 | 0.039 | 0.000 | 0.040 |
| Jack_Septic_Eye | 0.000 | 0.077 | 0.000 | 0.076 | 0.000 | 0.090 | 0.000 | 0.054 |
| id_790983013224030209 | 0.004 | 0.077 | 0.007 | 0.083 | 0.000 | 0.047 | 0.000 | 0.012 |
| MsRebeccaBlack | 0.000 | 0.077 | 0.000 | 0.102 | 0.000 | 0.011 | 0.050 | 0.125 |
| shespeaksup | 0.000 | 0.077 | 0.026 | 0.122 | 0.000 | 0.075 | 0.000 | 0.064 |
| iansomerhalder | 0.000 | 0.078 | 0.000 | 0.119 | 0.000 | 0.113 | 0.001 | 0.057 |
| Barnacules | 0.000 | 0.078 | 0.004 | 0.027 | 0.000 | 0.022 | 0.019 | 0.062 |
| bigquint | 0.004 | 0.078 | 0.029 | 0.098 | 0.000 | 0.029 | 0.001 | 0.036 |
| depechemode | 0.019 | 0.078 | 0.004 | 0.110 | 0.000 | 0.084 | 0.000 | 0.077 |
| scottmhughes | 0.000 | 0.078 | 0.000 | 0.115 | 0.000 | 0.100 | 0.001 | 0.041 |
| DiscoverSelf | 0.000 | 0.078 | 0.002 | 0.167 | 0.000 | 0.108 | 0.000 | 0.057 |
| ActuallyNPH | 0.000 | 0.078 | 0.000 | 0.086 | 0.000 | 0.073 | 0.000 | 0.064 |
| earlxsweat | 0.009 | 0.078 | 0.000 | 0.031 | 0.000 | 0.081 | 0.002 | 0.069 |
| jacksfilms | 0.000 | 0.078 | 0.010 | 0.051 | 0.000 | 0.059 | 0.000 | 0.032 |
| halsey | 0.006 | 0.078 | 0.000 | 0.053 | 0.000 | 0.031 | 0.000 | -0.001 |
| Boogie2988 | 0.000 | 0.079 | 0.000 | 0.071 | 0.000 | 0.010 | 0.000 | 0.016 |
| DavidSpade | 0.014 | 0.079 | 0.000 | 0.074 | 0.001 | 0.087 | 0.000 | 0.086 |
| RobertDowneyJr | 0.000 | 0.080 | 0.002 | 0.063 | 0.000 | 0.058 | 0.001 | 0.044 |
| Shopkick | 0.000 | 0.080 | 0.000 | 0.050 | 0.000 | 0.025 | 0.000 | 0.012 |
| MBMBaM | 0.000 | 0.080 | 0.003 | 0.063 | 0.000 | 0.047 | 0.000 | 0.026 |
| James_Phelps | 0.009 | 0.080 | 0.000 | 0.073 | 0.000 | 0.018 | 0.000 | 0.068 |
| grav3yardgirl | 0.000 | 0.080 | 0.000 | 0.089 | 0.000 | 0.047 | 0.000 | 0.016 |
| ThePrizeRebel | 0.000 | 0.080 | 0.004 | 0.008 | 0.002 | 0.036 | 0.000 | -0.019 |
| SavingStar | 0.008 | 0.080 | 0.000 | 0.067 | 0.000 | 0.095 | 0.000 | 0.009 |
| ZachBoychuk | 0.000 | 0.080 | 0.002 | 0.083 | 0.000 | 0.088 | 0.000 | 0.048 |
| MatthewPerry | 0.000 | 0.080 | 0.000 | 0.112 | 0.000 | 0.108 | 0.000 | 0.105 |
| InboxDollars | 0.022 | 0.080 | 0.000 | 0.055 | 0.001 | 0.087 | 0.000 | -0.012 |
| WholesomeMeme | 0.002 | 0.080 | 0.000 | 0.069 | 0.001 | 0.064 | 0.000 | 0.006 |
| jamesbardolph | 0.000 | 0.081 | 0.000 | -0.012 | 0.000 | -0.010 | 0.000 | 0.077 |
| platinumgames | 0.006 | 0.081 | 0.003 | 0.019 | 0.000 | -0.002 | 0.000 | 0.150 |
| RealKevinConroy | 0.000 | 0.081 | 0.000 | 0.022 | 0.000 | 0.029 | 0.000 | 0.010 |
| JoshRadnor | 0.000 | 0.081 | 0.000 | 0.042 | 0.000 | 0.045 | 0.000 | 0.015 |
| Alex_Verbeek | 0.000 | 0.081 | 0.000 | 0.047 | 0.000 | -0.026 | 0.000 | 0.030 |
| KathyHabel | 0.000 | 0.081 | 0.015 | 0.050 | 0.000 | 0.069 | 0.000 | -0.032 |
| StephMcMahon | 0.000 | 0.081 | 0.000 | 0.053 | 0.000 | -0.010 | 0.000 | -0.027 |
| MACcosmetics | 0.000 | 0.081 | 0.000 | 0.098 | 0.002 | 0.147 | 0.000 | 0.046 |
| queenofreview | 0.000 | 0.081 | 0.000 | 0.127 | 0.001 | 0.100 | 0.000 | 0.077 |
| DairyFreeGFLife | 0.000 | 0.081 | 0.024 | 0.127 | 0.000 | 0.100 | 0.000 | 0.077 |
| medictom | 0.000 | 0.081 | 0.000 | 0.127 | 0.000 | 0.100 | 0.000 | 0.077 |
| zackfox | 0.001 | 0.081 | 0.003 | 0.021 | 0.000 | 0.012 | 0.000 | 0.064 |
| Wario64 | 0.000 | 0.081 | 0.000 | 0.076 | 0.000 | 0.051 | 0.004 | 0.109 |
| nerdist | 0.000 | 0.082 | 0.000 | 0.064 | 0.000 | 0.077 | 0.004 | 0.063 |
| TayZonday | 0.000 | 0.082 | 0.000 | 0.035 | 0.000 | 0.020 | 0.000 | 0.087 |
| postsecret | 0.000 | 0.082 | 0.009 | 0.093 | 0.001 | 0.092 | 0.000 | 0.091 |
| ninadobrev | 0.000 | 0.082 | 0.000 | 0.110 | 0.000 | 0.087 | 0.000 | 0.102 |
| IndivisibleTeam | 0.000 | 0.082 | 0.000 | 0.120 | 0.000 | 0.036 | 0.000 | 0.102 |
| moot | 0.005 | 0.083 | 0.000 | 0.014 | 0.000 | -0.005 | 0.005 | 0.092 |
| gingercasa1 | 0.001 | 0.083 | 0.000 | 0.158 | 0.000 | 0.135 | 0.000 | 0.044 |
| arresteddev | 0.000 | 0.083 | 0.000 | 0.047 | 0.000 | 0.068 | 0.000 | 0.049 |
| jennyslate | 0.000 | 0.083 | 0.000 | 0.081 | 0.000 | 0.083 | 0.000 | 0.040 |
| chrisdelia | 0.000 | 0.083 | 0.003 | 0.081 | 0.000 | 0.111 | 0.000 | 0.068 |
| WarnerBrosEnt | 0.006 | 0.083 | 0.000 | 0.083 | 0.000 | 0.097 | 0.000 | 0.068 |
| Smashbox | 0.000 | 0.083 | 0.003 | 0.104 | 0.000 | 0.147 | 0.000 | 0.059 |
| dentistmel | 0.000 | 0.083 | 0.000 | 0.122 | 0.000 | 0.118 | 0.003 | 0.035 |
| donnahup | 0.000 | 0.083 | 0.000 | 0.153 | 0.000 | 0.090 | 0.000 | 0.035 |
| JohnCleese | 0.000 | 0.083 | 0.000 | 0.071 | 0.002 | 0.106 | 0.000 | 0.047 |
| GeekandSundry | 0.011 | 0.083 | 0.006 | 0.067 | 0.000 | 0.087 | 0.005 | 0.077 |
| altUSEPA | 0.015 | 0.083 | 0.001 | 0.126 | 0.000 | 0.041 | 0.000 | 0.094 |
| AtlusUSA | 0.000 | 0.083 | 0.000 | 0.012 | 0.000 | 0.012 | 0.000 | 0.048 |
| ZacksJerryRig | 0.000 | 0.083 | 0.000 | 0.016 | 0.000 | 0.022 | 0.000 | 0.015 |
| OnFireSemmler | 0.000 | 0.083 | 0.000 | 0.061 | 0.000 | 0.029 | 0.000 | 0.067 |
| littlebitsofall | 0.000 | 0.083 | 0.000 | 0.121 | 0.002 | 0.124 | 0.000 | 0.025 |
| optimistic_mama | 0.000 | 0.083 | 0.000 | 0.121 | 0.000 | 0.124 | 0.000 | 0.025 |
| lifewithheidig | 0.001 | 0.083 | 0.000 | 0.158 | 0.002 | 0.147 | 0.000 | 0.062 |
| markiplier | 0.000 | 0.084 | 0.000 | 0.112 | 0.000 | 0.102 | 0.000 | 0.034 |
| AppStore | 0.001 | 0.085 | 0.002 | 0.091 | 0.000 | 0.087 | 0.017 | 0.097 |
| normmacdonald | 0.000 | 0.085 | 0.000 | 0.124 | 0.000 | 0.128 | 0.000 | 0.097 |
| thinkgeek | 0.000 | 0.085 | 0.000 | 0.069 | 0.000 | 0.028 | 0.000 | 0.036 |
| ESLCS | 0.000 | 0.085 | 0.001 | 0.021 | 0.000 | -0.018 | 0.000 | 0.062 |
| dragonblogger | 0.000 | 0.085 | 0.000 | 0.069 | 0.000 | -0.005 | 0.000 | 0.031 |
| Guardians | 0.000 | 0.085 | 0.000 | 0.081 | 0.000 | 0.075 | 0.005 | 0.079 |
| PPact | 0.000 | 0.085 | 0.011 | 0.122 | 0.000 | 0.028 | 0.000 | 0.062 |
| amandabynes | 0.001 | 0.085 | 0.000 | 0.071 | 0.002 | 0.072 | 0.000 | 0.093 |
| marcmaron | 0.022 | 0.085 | 0.000 | 0.086 | 0.000 | 0.050 | 0.000 | 0.122 |
| RayWJ | 0.025 | 0.085 | 0.000 | 0.019 | 0.000 | 0.011 | 0.000 | 0.078 |
| Four_Pins | 0.000 | 0.085 | 0.000 | 0.052 | 0.000 | 0.083 | 0.000 | 0.059 |
| 20thcenturyfox | 0.000 | 0.085 | 0.000 | 0.065 | 0.000 | 0.075 | 0.000 | 0.059 |
| thepennyhoarder | 0.000 | 0.085 | 0.000 | 0.096 | 0.000 | 0.083 | 0.000 | 0.021 |
| pamelamaynard | 0.000 | 0.085 | 0.000 | 0.109 | 0.000 | 0.126 | 0.000 | 0.064 |
| ParentingAuthor | 0.000 | 0.085 | 0.000 | 0.122 | 0.000 | 0.090 | 0.000 | 0.035 |
| anthonyjeselnik | 0.015 | 0.085 | 0.000 | 0.076 | 0.001 | 0.074 | 0.010 | 0.094 |
| NotAltWorld | 0.002 | 0.085 | 0.000 | 0.132 | 0.000 | 0.022 | 0.001 | 0.017 |
| boburnham | 0.000 | 0.086 | 0.004 | 0.056 | 0.000 | 0.023 | 0.000 | 0.051 |
| CBSSports | 0.000 | 0.086 | 0.000 | 0.019 | 0.000 | 0.053 | 0.000 | 0.072 |
| Deadpool | 0.000 | 0.086 | 0.000 | 0.025 | 0.000 | 0.022 | 0.000 | 0.067 |
| Sadokist | 0.005 | 0.086 | 0.000 | 0.033 | 0.000 | -0.002 | 0.000 | 0.093 |
| brucegreene | 0.011 | 0.086 | 0.000 | 0.033 | 0.000 | 0.053 | 0.000 | -0.042 |
| Tiffanyblogs | 0.003 | 0.086 | 0.000 | 0.078 | 0.000 | 0.029 | 0.000 | -0.006 |
| ParamountPics | 0.000 | 0.087 | 0.000 | 0.107 | 0.000 | 0.082 | 0.000 | 0.083 |
| UrbanDecay | 0.000 | 0.087 | 0.005 | 0.077 | 0.000 | 0.106 | 0.000 | 0.048 |
| kenradio | 0.003 | 0.088 | 0.000 | 0.042 | 0.000 | 0.046 | 0.001 | -0.003 |
| dongatory | 0.000 | 0.088 | 0.001 | 0.060 | 0.000 | 0.047 | 0.000 | 0.002 |
| JessicaJones | 0.009 | 0.088 | 0.000 | 0.073 | 0.001 | 0.097 | 0.000 | 0.083 |
| SpaceLy | 0.025 | 0.088 | 0.000 | 0.099 | 0.000 | 0.039 | 0.000 | 0.021 |
| JimCarrey | 0.000 | 0.088 | 0.000 | 0.078 | 0.001 | 0.053 | 0.000 | 0.089 |
| Walgreens | 0.000 | 0.088 | 0.000 | 0.115 | 0.000 | 0.082 | 0.008 | 0.128 |
| pcgamer | 0.000 | 0.089 | 0.006 | 0.002 | 0.000 | -0.005 | 0.028 | 0.079 |
| smealum | 0.000 | 0.089 | 0.000 | 0.005 | 0.000 | -0.018 | 0.000 | 0.036 |
| PlanetofFinks | 0.000 | 0.089 | 0.003 | 0.087 | 0.001 | 0.084 | 0.000 | 0.030 |
| Forever21 | 0.000 | 0.089 | 0.006 | 0.107 | 0.000 | 0.069 | 0.000 | 0.082 |
| buildabear | 0.000 | 0.089 | 0.000 | 0.115 | 0.000 | 0.108 | 0.000 | 0.020 |
| JRsBBQ | 0.023 | 0.090 | 0.000 | 0.023 | 0.000 | 0.025 | 0.000 | 0.006 |
| The_SpaceWitch | 0.000 | 0.090 | 0.000 | 0.129 | 0.000 | 0.112 | 0.000 | 0.076 |
| ScottAukerman | 0.000 | 0.090 | 0.000 | 0.031 | 0.000 | 0.035 | 0.001 | 0.048 |
| id_707968258054496257 | 0.000 | 0.090 | 0.000 | 0.033 | 0.000 | 0.002 | 0.000 | 0.013 |
| CaptainAmerica | 0.000 | 0.090 | 0.000 | 0.043 | 0.000 | 0.055 | 0.000 | 0.048 |
| TheSlyStallone | 0.012 | 0.090 | 0.000 | 0.059 | 0.000 | 0.035 | 0.000 | 0.048 |
| Nightowlmama | 0.000 | 0.090 | 0.000 | 0.119 | 0.000 | 0.042 | 0.000 | 0.013 |
| DrewFromTV | 0.000 | 0.090 | 0.000 | 0.070 | 0.000 | 0.063 | 0.000 | 0.051 |
| KaitlinOlson | 0.000 | 0.090 | 0.000 | 0.054 | 0.000 | 0.092 | 0.006 | 0.094 |
| JoshOG | 0.000 | 0.090 | 0.000 | 0.037 | 0.000 | 0.011 | 0.000 | 0.073 |
| BreitbartNews | 0.000 | 0.090 | 0.000 | 0.096 | 0.000 | 0.111 | 0.010 | 0.073 |
| TwBookClub | 0.000 | 0.090 | 0.000 | 0.130 | 0.000 | 0.133 | 0.000 | 0.049 |
| makobiscribe | 0.000 | 0.090 | 0.000 | 0.135 | 0.000 | 0.126 | 0.000 | 0.040 |
| johngreen | 0.000 | 0.091 | 0.000 | 0.064 | 0.000 | 0.058 | 0.013 | 0.067 |
| lorde | 0.003 | 0.091 | 0.000 | 0.091 | 0.000 | -0.013 | 0.005 | 0.083 |
| PokeVisionGo | 0.000 | 0.092 | 0.009 | 0.056 | 0.000 | 0.045 | 0.000 | -0.006 |
| MatPatGT | 0.000 | 0.092 | 0.000 | 0.067 | 0.002 | 0.116 | 0.000 | 0.036 |
| Simone_Biles | 0.000 | 0.092 | 0.002 | 0.078 | 0.000 | 0.014 | 0.000 | 0.030 |
| id_747615361705648129 | 0.045 | 0.092 | 0.000 | 0.084 | 0.000 | 0.108 | 0.000 | 0.077 |
| EmilyReviewsCom | 0.010 | 0.092 | 0.000 | 0.112 | 0.000 | 0.077 | 0.000 | 0.072 |
| GabbyLowe | 0.000 | 0.092 | 0.000 | 0.118 | 0.002 | 0.100 | 0.000 | 0.030 |
| Couponmamacita | 0.015 | 0.092 | 0.001 | 0.127 | 0.000 | 0.084 | 0.000 | 0.030 |
| peeweeherman | 0.000 | 0.092 | 0.012 | 0.095 | 0.000 | 0.107 | 0.000 | 0.081 |
| Minecraft | 0.000 | 0.092 | 0.000 | 0.011 | 0.000 | 0.028 | 0.000 | 0.057 |
| Applebees | 0.000 | 0.092 | 0.000 | 0.057 | 0.000 | 0.035 | 0.002 | 0.044 |
| thekillers | 0.003 | 0.092 | 0.000 | 0.091 | 0.000 | 0.101 | 0.000 | 0.101 |
| ItsRamiMalek | 0.007 | 0.092 | 0.000 | 0.091 | 0.000 | 0.053 | 0.000 | 0.062 |
| chloebennet | 0.010 | 0.093 | 0.002 | 0.037 | 0.000 | 0.018 | 0.000 | 0.064 |
| seangares | 0.000 | 0.093 | 0.000 | 0.039 | 0.000 | -0.004 | 0.000 | 0.068 |
| ColtonLHaynes | 0.003 | 0.093 | 0.006 | 0.120 | 0.000 | 0.083 | 0.000 | 0.125 |
| s8r8l33 | 0.000 | 0.093 | 0.000 | 0.127 | 0.000 | 0.126 | 0.000 | 0.026 |
| JayMewes | 0.000 | 0.094 | 0.000 | 0.043 | 0.000 | 0.075 | 0.000 | 0.056 |
| poppy | 0.000 | 0.095 | 0.000 | 0.081 | 0.000 | 0.075 | 0.000 | 0.026 |
| elfcosmetics | 0.000 | 0.095 | 0.000 | 0.042 | 0.000 | 0.061 | 0.008 | 0.067 |
| Friday13thGame | 0.000 | 0.095 | 0.000 | 0.095 | 0.000 | 0.022 | 0.000 | 0.082 |
| teksyndicate | 0.000 | 0.095 | 0.002 | 0.095 | 0.000 | 0.147 | 0.000 | 0.108 |
| ArcticMonkeys | 0.008 | 0.095 | 0.000 | 0.101 | 0.000 | 0.132 | 0.004 | 0.062 |
| KimAtLiah | 0.000 | 0.095 | 0.000 | 0.107 | 0.000 | 0.100 | 0.000 | 0.020 |
| LongWait4Bella | 0.000 | 0.095 | 0.000 | 0.129 | 0.000 | 0.077 | 0.000 | 0.041 |
| Smile7891 | 0.000 | 0.095 | 0.000 | 0.141 | 0.000 | 0.116 | 0.000 | 0.051 |
| edhelms | 0.002 | 0.095 | 0.000 | 0.060 | 0.000 | 0.084 | 0.000 | 0.105 |
| NateMaingard | 0.024 | 0.096 | 0.000 | 0.125 | 0.001 | 0.090 | 0.008 | 0.078 |
| brettbmartin | 0.016 | 0.096 | 0.000 | 0.130 | 0.001 | 0.111 | 0.000 | 0.035 |
| RealMomReviews | 0.000 | 0.096 | 0.014 | 0.130 | 0.001 | 0.111 | 0.000 | 0.035 |
| Swagbucks | 0.000 | 0.096 | 0.011 | 0.089 | 0.000 | 0.064 | 0.004 | 0.022 |
| JLo | 0.001 | 0.096 | 0.000 | 0.133 | 0.000 | 0.146 | 0.000 | 0.105 |
| AppleMusic | 0.002 | 0.096 | 0.000 | 0.120 | 0.000 | 0.070 | 0.000 | 0.106 |
| nathanfielder | 0.000 | 0.097 | 0.000 | 0.035 | 0.000 | 0.064 | 0.000 | 0.066 |
| BRIANMBENDIS | 0.000 | 0.098 | 0.000 | 0.010 | 0.000 | 0.029 | 0.001 | 0.067 |
| OnFireAnders | 0.000 | 0.098 | 0.000 | 0.039 | 0.000 | 0.022 | 0.000 | 0.067 |
| tkdsl8655 | 0.000 | 0.098 | 0.000 | 0.070 | 0.000 | 0.014 | 0.000 | 0.056 |
| JordanKeyes | 0.000 | 0.098 | 0.000 | 0.070 | 0.000 | 0.014 | 0.000 | 0.056 |
| NyxCosmetics | 0.008 | 0.098 | 0.002 | 0.078 | 0.000 | 0.116 | 0.000 | 0.077 |
| SimplySherryl | 0.000 | 0.098 | 0.020 | 0.087 | 0.000 | 0.061 | 0.000 | -0.006 |
| StephenKing | 0.003 | 0.098 | 0.000 | 0.125 | 0.000 | 0.095 | 0.000 | 0.077 |
| charliesheen | 0.000 | 0.098 | 0.000 | 0.089 | 0.000 | 0.091 | 0.000 | 0.118 |
| Bob_Mayer | 0.000 | 0.098 | 0.026 | 0.099 | 0.001 | 0.133 | 0.000 | 0.064 |
| tartecosmetics | 0.002 | 0.098 | 0.002 | 0.102 | 0.000 | 0.111 | 0.000 | 0.040 |
| GiveawayBandit | 0.000 | 0.098 | 0.000 | 0.133 | 0.000 | 0.104 | 0.001 | 0.045 |
| id_18708466 | 0.000 | 0.098 | 0.001 | 0.053 | 0.000 | 0.065 | 0.000 | 0.038 |
| shanedawson | 0.000 | 0.099 | 0.000 | 0.051 | 0.000 | 0.042 | 0.000 | 0.084 |
| elijahwood | 0.000 | 0.099 | 0.000 | 0.066 | 0.001 | 0.118 | 0.000 | 0.052 |
| id_113134752 | 0.010 | 0.099 | 0.000 | 0.073 | 0.001 | 0.092 | 0.000 | 0.068 |
| id_822517901294845953 | 0.000 | 0.099 | 0.033 | 0.171 | 0.000 | 0.174 | 0.013 | 0.130 |
| davidduchovny | 0.000 | 0.099 | 0.000 | 0.115 | 0.000 | 0.088 | 0.000 | 0.088 |
| BestBuy_Deals | 0.001 | 0.099 | 0.000 | 0.129 | 0.000 | 0.148 | 0.000 | 0.097 |
| AndyRichter | 0.002 | 0.099 | 0.003 | 0.086 | 0.000 | 0.083 | 0.000 | 0.073 |
| alyankovic | 0.000 | 0.100 | 0.034 | 0.098 | 0.000 | 0.070 | 0.002 | 0.030 |
| ThatKevinSmith | 0.000 | 0.100 | 0.000 | 0.069 | 0.000 | 0.129 | 0.000 | 0.130 |
| StefanMolyneux | 0.000 | 0.100 | 0.001 | 0.070 | 0.001 | 0.084 | 0.000 | 0.041 |
| KelliBMiller | 0.003 | 0.100 | 0.008 | 0.135 | 0.002 | 0.100 | 0.000 | 0.046 |
| alydenisof | 0.027 | 0.101 | 0.004 | 0.073 | 0.000 | 0.053 | 0.000 | 0.051 |
| edgarwright | 0.000 | 0.101 | 0.004 | 0.050 | 0.000 | 0.081 | 0.000 | 0.040 |
| united | 0.000 | 0.101 | 0.000 | 0.034 | 0.000 | -0.004 | 0.001 | -0.007 |
| NBK | 0.000 | 0.101 | 0.008 | 0.063 | 0.000 | 0.004 | 0.000 | 0.059 |
| SeeMomClick | 0.000 | 0.101 | 0.000 | 0.135 | 0.000 | 0.118 | 0.000 | 0.073 |
| Maisie_Williams | 0.000 | 0.101 | 0.000 | 0.084 | 0.000 | 0.097 | 0.000 | 0.070 |
| bbpoltergiest | 0.000 | 0.102 | 0.000 | 0.021 | 0.000 | 0.028 | 0.003 | 0.101 |
| markwahlberg | 0.000 | 0.102 | 0.006 | 0.059 | 0.000 | 0.074 | 0.000 | 0.038 |
| kencaillat | 0.000 | 0.103 | 0.000 | 0.079 | 0.000 | 0.036 | 0.001 | 0.017 |
| Fanatical | 0.002 | 0.103 | 0.003 | 0.012 | 0.000 | 0.002 | 0.000 | 0.076 |
| 2kidsandacoupon | 0.000 | 0.103 | 0.000 | 0.165 | 0.000 | 0.137 | 0.001 | 0.064 |
| FLOTUS | 0.000 | 0.103 | 0.000 | 0.079 | 0.000 | 0.047 | 0.008 | 0.008 |
| rwilco12 | 0.000 | 0.103 | 0.000 | 0.067 | 0.000 | 0.029 | 0.000 | 0.015 |
| HardcoreHistory | 0.002 | 0.103 | 0.002 | 0.084 | 0.000 | 0.037 | 0.007 | 0.062 |
| AdamSandler | 0.000 | 0.103 | 0.000 | 0.087 | 0.000 | 0.069 | 0.000 | 0.072 |
| AnthonySHead | 0.030 | 0.103 | 0.011 | 0.090 | 0.000 | 0.092 | 0.000 | 0.046 |
| TheOregonDuck | 0.000 | 0.104 | 0.005 | 0.115 | 0.000 | 0.075 | 0.000 | 0.110 |
| saurik | 0.016 | 0.105 | 0.006 | 0.053 | 0.000 | 0.020 | 0.000 | 0.040 |
| RobLowe | 0.039 | 0.105 | 0.000 | 0.126 | 0.002 | 0.117 | 0.000 | 0.083 |
| BrettFavre | 0.000 | 0.106 | 0.000 | 0.083 | 0.000 | 0.068 | 0.000 | 0.083 |
| christendtweets | 0.000 | 0.106 | 0.013 | 0.089 | 0.000 | 0.118 | 0.000 | 0.087 |
| YogscastLalna | 0.011 | 0.106 | 0.000 | 0.050 | 0.000 | 0.029 | 0.002 | -0.042 |
| YogscastSjin | 0.000 | 0.106 | 0.004 | 0.050 | 0.000 | 0.029 | 0.000 | -0.042 |
| Hunt4Freebies | 0.028 | 0.106 | 0.025 | 0.110 | 0.001 | 0.092 | 0.003 | 0.051 |
| SanitySuburbia | 0.054 | 0.106 | 0.000 | 0.149 | 0.003 | 0.139 | 0.000 | 0.051 |
| jonbonjovious | 0.000 | 0.106 | 0.000 | 0.186 | 0.001 | 0.163 | 0.000 | 0.087 |
| Whataburger | 0.000 | 0.107 | 0.002 | 0.075 | 0.000 | 0.126 | 0.003 | 0.065 |
| griffinmcelroy | 0.000 | 0.107 | 0.014 | 0.083 | 0.000 | 0.068 | 0.001 | 0.035 |
| terrycrews | 0.019 | 0.108 | 0.000 | 0.102 | 0.000 | 0.074 | 0.000 | 0.097 |
| HarleyPlays | 0.000 | 0.109 | 0.000 | 0.060 | 0.000 | 0.032 | 0.000 | 0.045 |
| SweepsAdvantage | 0.000 | 0.109 | 0.000 | 0.148 | 0.000 | 0.140 | 0.000 | 0.083 |
| SethBling | 0.000 | 0.109 | 0.005 | 0.019 | 0.000 | 0.014 | 0.000 | -0.016 |
| hotted89 | 0.000 | 0.109 | 0.000 | 0.042 | 0.000 | -0.002 | 0.006 | 0.093 |
| BobsBurgersFOX | 0.000 | 0.109 | 0.010 | 0.127 | 0.001 | 0.100 | 0.001 | 0.108 |
| tapas_app | 0.000 | 0.109 | 0.000 | 0.132 | 0.000 | 0.022 | 0.003 | 0.041 |
| PBnWhine | 0.000 | 0.109 | 0.000 | 0.152 | 0.000 | 0.132 | 0.000 | 0.062 |
| Lovesmytwoboys | 0.000 | 0.109 | 0.000 | 0.152 | 0.000 | 0.132 | 0.000 | 0.062 |
| KellysLuckyYou | 0.012 | 0.109 | 0.005 | 0.155 | 0.000 | 0.122 | 0.000 | 0.043 |
| PhillyD | 0.000 | 0.109 | 0.000 | -0.018 | 0.000 | 0.030 | 0.000 | 0.044 |
| jimmykimmel | 0.001 | 0.110 | 0.008 | 0.086 | 0.000 | 0.028 | 0.000 | 0.089 |
| Idubbbz | 0.003 | 0.110 | 0.000 | 0.055 | 0.000 | 0.031 | 0.000 | 0.033 |
| RMcElhenney | 0.008 | 0.111 | 0.000 | 0.063 | 0.001 | 0.115 | 0.000 | 0.084 |
| kenjeong | 0.000 | 0.111 | 0.000 | 0.097 | 0.000 | 0.087 | 0.000 | 0.094 |
| SimonHoneydew | 0.000 | 0.111 | 0.000 | 0.052 | 0.000 | 0.035 | 0.000 | -0.035 |
| SpiderManMovie | 0.000 | 0.111 | 0.000 | 0.107 | 0.001 | 0.082 | 0.000 | 0.132 |
| MSmithBubbles | 0.000 | 0.112 | 0.021 | 0.093 | 0.000 | 0.092 | 0.007 | 0.108 |
| AHSFX | 0.000 | 0.112 | 0.000 | 0.112 | 0.000 | 0.061 | 0.000 | 0.077 |
| agalneeds | 0.000 | 0.112 | 0.000 | 0.132 | 0.000 | 0.092 | 0.000 | 0.036 |
| ruthhill74 | 0.000 | 0.112 | 0.022 | 0.132 | 0.000 | 0.092 | 0.000 | 0.036 |
| Survey_Squad | 0.000 | 0.112 | 0.009 | 0.113 | 0.000 | 0.069 | 0.000 | 0.101 |
| jeb_ | 0.011 | 0.112 | 0.000 | 0.043 | 0.001 | 0.077 | 0.000 | 0.074 |
| Lin_Manuel | 0.000 | 0.112 | 0.000 | 0.121 | 0.000 | 0.094 | 0.005 | 0.082 |
| Snowden | 0.024 | 0.114 | 0.008 | 0.087 | 0.000 | 0.075 | 0.005 | 0.053 |
| G2kennyS | 0.010 | 0.115 | 0.000 | 0.056 | 0.000 | 0.014 | 0.000 | 0.082 |
| nicepeter | 0.050 | 0.115 | 0.026 | 0.078 | 0.000 | 0.029 | 0.000 | 0.051 |
| id_23741531 | 0.000 | 0.115 | 0.000 | 0.084 | 0.000 | 0.077 | 0.000 | 0.087 |
| id_805534657769078785 | 0.000 | 0.115 | 0.000 | 0.090 | 0.001 | 0.069 | 0.000 | -0.001 |
| NIVEAUSA | 0.010 | 0.115 | 0.000 | 0.144 | 0.000 | 0.132 | 0.000 | 0.072 |
| CourteneyCox | 0.000 | 0.116 | 0.015 | 0.114 | 0.000 | 0.061 | 0.018 | 0.064 |
| sleepopolis | 0.000 | 0.116 | 0.000 | 0.159 | 0.000 | 0.140 | 0.000 | 0.059 |
| NightValeRadio | 0.000 | 0.117 | 0.000 | 0.083 | 0.001 | 0.059 | 0.000 | 0.032 |
| FSOC2011 | 0.018 | 0.117 | 0.000 | 0.151 | 0.001 | 0.156 | 0.000 | 0.064 |
| _BIGCAT | 0.025 | 0.117 | 0.000 | 0.076 | 0.000 | 0.092 | 0.000 | 0.119 |
| id_824473943931293697 | 0.043 | 0.119 | 0.000 | 0.153 | 0.001 | 0.098 | 0.000 | 0.122 |
| EdwardNorton | 0.000 | 0.120 | 0.000 | 0.129 | 0.000 | 0.146 | 0.000 | 0.117 |
| DavidKoechner | 0.000 | 0.120 | 0.000 | 0.104 | 0.000 | 0.084 | 0.001 | 0.082 |
| Lilpeep | 0.040 | 0.120 | 0.009 | 0.107 | 0.000 | 0.139 | 0.000 | 0.139 |
| deadpoolmovie | 0.008 | 0.121 | 0.000 | 0.081 | 0.000 | 0.097 | 0.007 | 0.111 |
| Chrisspymakeup | 0.000 | 0.121 | 0.000 | 0.120 | 0.000 | 0.118 | 0.000 | 0.068 |
| RBReich | 0.000 | 0.121 | 0.000 | 0.169 | 0.000 | 0.118 | 0.000 | 0.140 |
| melissamccarthy | 0.000 | 0.121 | 0.019 | 0.179 | 0.000 | 0.111 | 0.000 | 0.140 |
| SteveCarell | 0.007 | 0.123 | 0.002 | 0.137 | 0.001 | 0.094 | 0.001 | 0.099 |
| GRRMspeaking | 0.012 | 0.123 | 0.000 | 0.056 | 0.000 | 0.088 | 0.000 | 0.074 |
| DesiPerkins | 0.017 | 0.123 | 0.000 | 0.118 | 0.003 | 0.125 | 0.000 | 0.072 |
| TrumpDraws | 0.007 | 0.124 | 0.020 | 0.140 | 0.000 | 0.055 | 0.002 | 0.015 |
| ZackSnyder | 0.000 | 0.124 | 0.000 | 0.091 | 0.001 | 0.104 | 0.000 | 0.092 |
| TheWookieeRoars | 0.000 | 0.124 | 0.007 | 0.109 | 0.000 | 0.118 | 0.000 | 0.106 |
| johnkrasinski | 0.002 | 0.124 | 0.000 | 0.070 | 0.000 | 0.055 | 0.000 | 0.028 |
| joelmchale | 0.000 | 0.125 | 0.007 | 0.144 | 0.001 | 0.115 | 0.001 | 0.126 |
| Totalbiscuit | 0.018 | 0.125 | 0.000 | 0.100 | 0.002 | 0.173 | 0.000 | 0.047 |
| NateDiaz209 | 0.000 | 0.126 | 0.000 | 0.064 | 0.000 | 0.081 | 0.000 | 0.048 |
| pewdiepie | 0.008 | 0.126 | 0.000 | 0.072 | 0.000 | 0.079 | 0.000 | 0.016 |
| Comic_Con | 0.000 | 0.126 | 0.000 | 0.055 | 0.000 | 0.042 | 0.000 | 0.057 |
| BillCosby | 0.000 | 0.126 | 0.000 | 0.055 | 0.000 | 0.068 | 0.000 | 0.097 |
| OrvilleIV | 0.000 | 0.126 | 0.000 | 0.100 | 0.000 | 0.075 | 0.004 | 0.123 |
| YogscastLewis | 0.000 | 0.126 | 0.000 | 0.064 | 0.000 | 0.045 | 0.000 | -0.037 |
| NaNoWriMo | 0.002 | 0.126 | 0.000 | 0.104 | 0.000 | 0.151 | 0.000 | 0.094 |
| jonlajoiecomedy | 0.000 | 0.127 | 0.000 | 0.112 | 0.000 | 0.075 | 0.000 | 0.106 |
| CouponsFreebie | 0.000 | 0.127 | 0.000 | 0.164 | 0.000 | 0.154 | 0.000 | 0.054 |
| arnettwill | 0.001 | 0.127 | 0.021 | 0.139 | 0.000 | 0.107 | 0.000 | 0.124 |
| colesprouse | 0.000 | 0.128 | 0.000 | 0.082 | 0.001 | 0.070 | 0.000 | 0.031 |
| batemanjason | 0.000 | 0.129 | 0.011 | 0.122 | 0.000 | 0.137 | 0.000 | 0.140 |
| GillianA | 0.000 | 0.129 | 0.033 | 0.168 | 0.000 | 0.115 | 0.029 | 0.128 |
| ericandre | 0.000 | 0.129 | 0.000 | 0.052 | 0.000 | 0.061 | 0.000 | 0.077 |
| AMC_TV | 0.032 | 0.129 | 0.001 | 0.089 | 0.000 | 0.090 | 0.000 | 0.078 |
| RiffTrax | 0.000 | 0.129 | 0.000 | 0.146 | 0.001 | 0.162 | 0.000 | 0.116 |
| JustinRoiland | 0.000 | 0.130 | 0.000 | 0.059 | 0.000 | 0.076 | 0.000 | -0.005 |
| chrishemsworth | 0.000 | 0.131 | 0.001 | 0.098 | 0.000 | 0.082 | 0.000 | 0.092 |
| BillCorbett | 0.011 | 0.132 | 0.044 | 0.104 | 0.000 | 0.108 | 0.000 | 0.103 |
| cartoonnetwork | 0.000 | 0.132 | 0.000 | 0.107 | 0.000 | 0.090 | 0.003 | 0.068 |
| notch | 0.000 | 0.134 | 0.005 | 0.100 | 0.000 | 0.150 | 0.018 | 0.131 |
| MissingLynxx | 0.000 | 0.134 | 0.000 | 0.161 | 0.000 | 0.108 | 0.004 | 0.062 |
| IndoorSmokers | 0.000 | 0.134 | 0.000 | 0.120 | 0.000 | 0.039 | 0.000 | 0.016 |
| FamilyGuyonFOX | 0.000 | 0.137 | 0.000 | 0.149 | 0.001 | 0.087 | 0.000 | 0.155 |
| MrCraigRobinson | 0.000 | 0.137 | 0.019 | 0.149 | 0.000 | 0.131 | 0.002 | 0.105 |
| ders808 | 0.000 | 0.139 | 0.000 | 0.124 | 0.000 | 0.069 | 0.000 | 0.113 |
| UncleBlazer | 0.000 | 0.139 | 0.000 | 0.077 | 0.000 | 0.055 | 0.000 | 0.100 |
| HJBenjamin | 0.000 | 0.141 | 0.000 | 0.055 | 0.000 | 0.042 | 0.000 | 0.065 |
| CobieSmulders | 0.000 | 0.142 | 0.003 | 0.096 | 0.000 | 0.111 | 0.000 | 0.083 |
| TomHolland1996 | 0.000 | 0.145 | 0.001 | 0.086 | 0.000 | 0.097 | 0.000 | 0.073 |
| GroovyBruce | 0.000 | 0.145 | 0.000 | 0.118 | 0.001 | 0.182 | 0.000 | 0.124 |
| lustrelux | 0.000 | 0.147 | 0.011 | 0.127 | 0.000 | 0.140 | 0.000 | 0.087 |
| yogscast | 0.000 | 0.149 | 0.000 | 0.095 | 0.000 | 0.075 | 0.000 | -0.015 |
| BBCAMERICA | 0.000 | 0.149 | 0.008 | 0.178 | 0.000 | 0.110 | 0.000 | 0.117 |
| cinemassacre | 0.000 | 0.150 | 0.000 | 0.068 | 0.002 | 0.097 | 0.000 | 0.092 |
| JonTronShow | 0.000 | 0.159 | 0.000 | 0.094 | 0.001 | 0.079 | 0.000 | 0.023 |
| hypedresonance | 0.000 | 0.160 | 0.000 | 0.135 | 0.002 | 0.108 | 0.009 | 0.072 |
| charliekirk11 |  |  |  |  |  |  | 0.012 | -0.120 |
| jamesblake |  |  |  |  |  |  | 0.000 | -0.120 |
| FightOwensFight |  |  |  |  |  |  | 0.007 | -0.108 |
| RealCandaceO |  |  |  |  |  |  | 0.000 | -0.108 |
| GStephanopoulos |  |  |  |  |  |  | 0.004 | -0.108 |
| real1 |  |  |  |  |  |  | 0.009 | -0.108 |
| itsBayleyWWE |  |  |  |  |  |  | 0.002 | -0.108 |
| TenilleDashwood |  |  |  |  |  |  | 0.000 | -0.108 |
| anjunabeats |  |  |  |  |  |  | 0.000 | -0.108 |
| BretHart |  |  |  |  |  |  | 0.000 | -0.103 |
| TheDivisionGame |  |  |  |  |  |  | 0.000 | -0.097 |
| StockTwits |  |  |  |  |  |  | 0.000 | -0.097 |
| OliverHeldens |  |  |  |  |  |  | 0.014 | -0.097 |
| RealDDP |  |  |  |  |  |  | 0.028 | -0.097 |
| sosadtoday |  |  |  |  |  |  | 0.000 | -0.091 |
| fema |  |  |  |  |  |  | 0.000 | -0.091 |
| VuduFans |  |  |  |  |  |  | 0.004 | -0.091 |
| ImThatGentleman |  |  |  |  |  |  | 0.000 | -0.091 |
| Bonnaroo |  |  |  |  |  |  | 0.000 | -0.091 |
| JusReign |  |  |  |  |  |  | 0.000 | -0.091 |
| ManCity |  |  |  |  |  |  | 0.000 | -0.085 |
| NWSBoston |  |  |  |  |  |  | 0.000 | -0.079 |
| ImShmacked |  |  |  |  |  |  | 0.000 | -0.079 |
| JoeLauzon |  |  |  |  |  |  | 0.000 | -0.079 |
| CryptoGat |  |  |  |  |  |  | 0.000 | -0.079 |
| djh3max |  |  |  |  |  |  | 0.004 | -0.079 |
| hat_films |  |  |  |  |  |  | 0.000 | -0.079 |
| IzGutierrez |  |  |  |  |  |  | 0.000 | -0.079 |
| HPbasketball |  |  |  |  |  |  | 0.003 | -0.079 |
| JGhosty |  |  |  |  |  |  | 0.000 | -0.079 |
| TeamKaliber |  |  |  |  |  |  | 0.000 | -0.079 |
| momOFscump |  |  |  |  |  |  | 0.000 | -0.079 |
| jud3vill |  |  |  |  |  |  | 0.000 | -0.079 |
| NickSwagyPYoung |  |  |  |  |  |  | 0.000 | -0.079 |
| SportsAuthority |  |  |  |  |  |  | 0.000 | -0.079 |
| amazonecho |  |  |  |  |  |  | 0.000 | -0.074 |
| tha_rami |  |  |  |  |  |  | 0.000 | -0.074 |
| wex1200 |  |  |  |  |  |  | 0.000 | -0.074 |
| RitaPanahi |  |  |  |  |  |  | 0.000 | -0.074 |
| PegboardNerds |  |  |  |  |  |  | 0.000 | -0.074 |
| Coffee_House_ |  |  |  |  |  |  | 0.004 | -0.074 |
| Hiko |  |  |  |  |  |  | 0.000 | -0.074 |
| rare_basement |  |  |  |  |  |  | 0.000 | -0.074 |
| JohnnyFootbalI |  |  |  |  |  |  | 0.001 | -0.074 |
| Christian4Peeps |  |  |  |  |  |  | 0.000 | -0.074 |
| MOO |  |  |  |  |  |  | 0.000 | -0.074 |
| RyanMaue |  |  |  |  |  |  | 0.000 | -0.074 |
| NBATV |  |  |  |  |  |  | 0.000 | -0.074 |
| ClarionUSA |  |  |  |  |  |  | 0.000 | -0.074 |
| spacemarch |  |  |  |  |  |  | 0.000 | -0.068 |
| DraftKings |  |  |  |  |  |  | 0.000 | -0.068 |
| GovChristie |  |  |  |  |  |  | 0.000 | -0.068 |
| nbcsvu |  |  |  |  |  |  | 0.000 | -0.068 |
| bonappetit |  |  |  |  |  |  | 0.000 | -0.068 |
| thecooleyzone |  |  |  |  |  |  | 0.000 | -0.068 |
| Chromeo |  |  |  |  |  |  | 0.000 | -0.068 |
| NBAAllStar |  |  |  |  |  |  | 0.001 | -0.068 |
| TGIFridays |  |  |  |  |  |  | 0.000 | -0.068 |
| NFLfantasy |  |  |  |  |  |  | 0.000 | -0.068 |
| CivGame |  |  |  |  |  |  | 0.000 | -0.068 |
| heykayadams |  |  |  |  |  |  | 0.000 | -0.068 |
| KristenLedlow |  |  |  |  |  |  | 0.003 | -0.068 |
| JOEL9ONE |  |  |  |  |  |  | 0.000 | -0.068 |
| PRyan |  |  |  |  |  |  | 0.000 | -0.068 |
| DarrenKavinoky |  |  |  |  |  |  | 0.000 | -0.068 |
| SalmanRushdie |  |  |  |  |  |  | 0.008 | -0.068 |
| kawhileonard |  |  |  |  |  |  | 0.002 | -0.068 |
| FanDuel |  |  |  |  |  |  | 0.000 | -0.062 |
| ithrow88 |  |  |  |  |  |  | 0.000 | -0.062 |
| talkhoops |  |  |  |  |  |  | 0.000 | -0.062 |
| foundmyfitness |  |  |  |  |  |  | 0.000 | -0.062 |
| maxkellerman |  |  |  |  |  |  | 0.000 | -0.062 |
| TrueKofi |  |  |  |  |  |  | 0.000 | -0.062 |
| RadeonInstinct |  |  |  |  |  |  | 0.000 | -0.062 |
| RadeonPro |  |  |  |  |  |  | 0.000 | -0.062 |
| lolHauntzer |  |  |  |  |  |  | 0.000 | -0.062 |
| ShinsukeN |  |  |  |  |  |  | 0.000 | -0.062 |
| WWENXT |  |  |  |  |  |  | 0.000 | -0.062 |
| AutzenStudents |  |  |  |  |  |  | 0.000 | -0.062 |
| PennyRed |  |  |  |  |  |  | 0.000 | -0.062 |
| Mike_Stud |  |  |  |  |  |  | 0.000 | -0.062 |
| WWEUniverse |  |  |  |  |  |  | 0.000 | -0.062 |
| veritasium |  |  |  |  |  |  | 0.000 | -0.062 |
| FieldYates |  |  |  |  |  |  | 0.000 | -0.062 |
| nest |  |  |  |  |  |  | 0.000 | -0.062 |
| BeaccchHoussse |  |  |  |  |  |  | 0.000 | -0.062 |
| onespace_com |  |  |  |  |  |  | 0.004 | -0.056 |
| SSoHPKC |  |  |  |  |  |  | 0.000 | -0.056 |
| id_823321180144738307 |  |  |  |  |  |  | 0.000 | -0.056 |
| NikeNYC |  |  |  |  |  |  | 0.002 | -0.056 |
| AmyDumas |  |  |  |  |  |  | 0.000 | -0.056 |
| Splyce |  |  |  |  |  |  | 0.003 | -0.056 |
| USGS |  |  |  |  |  |  | 0.000 | -0.056 |
| markschlereth |  |  |  |  |  |  | 0.000 | -0.056 |
| CanonUSA |  |  |  |  |  |  | 0.000 | -0.056 |
| MarvelHeroes |  |  |  |  |  |  | 0.000 | -0.056 |
| alex_navarro |  |  |  |  |  |  | 0.000 | -0.056 |
| DontPayFull |  |  |  |  |  |  | 0.000 | -0.056 |
| 1iota |  |  |  |  |  |  | 0.000 | -0.056 |
| SkylerJohnson |  |  |  |  |  |  | 0.000 | -0.056 |
| DCpierson |  |  |  |  |  |  | 0.000 | -0.056 |
| Marriott |  |  |  |  |  |  | 0.000 | -0.056 |
| id_2922266132 |  |  |  |  |  |  | 0.001 | -0.056 |
| maddecent |  |  |  |  |  |  | 0.000 | -0.056 |
| CSLewisDaily |  |  |  |  |  |  | 0.000 | -0.056 |
| id_240254617 |  |  |  |  |  |  | 0.000 | -0.056 |
| Weak3n |  |  |  |  |  |  | 0.000 | -0.056 |
| Luminosity |  |  |  |  |  |  | 0.000 | -0.056 |
| lenovo |  |  |  |  |  |  | 0.000 | -0.050 |
| Adweek |  |  |  |  |  |  | 0.000 | -0.050 |
| aureylian |  |  |  |  |  |  | 0.003 | -0.050 |
| SamiZayn |  |  |  |  |  |  | 0.000 | -0.050 |
| artiequitter |  |  |  |  |  |  | 0.000 | -0.050 |
| Jerry_Remy |  |  |  |  |  |  | 0.000 | -0.050 |
| kporzee |  |  |  |  |  |  | 0.000 | -0.050 |
| pokelawls |  |  |  |  |  |  | 0.000 | -0.050 |
| Ghostcrawler |  |  |  |  |  |  | 0.000 | -0.050 |
| comcast |  |  |  |  |  |  | 0.002 | -0.050 |
| GameRant |  |  |  |  |  |  | 0.000 | -0.050 |
| david8hughes |  |  |  |  |  |  | 0.001 | -0.050 |
| subsetgames |  |  |  |  |  |  | 0.000 | -0.050 |
| NoisestormMusic |  |  |  |  |  |  | 0.002 | -0.050 |
| figgled |  |  |  |  |  |  | 0.000 | -0.050 |
| davedittell |  |  |  |  |  |  | 0.000 | -0.050 |
| ESPNFantasy |  |  |  |  |  |  | 0.000 | -0.050 |
| NI_News |  |  |  |  |  |  | 0.000 | -0.050 |
| Noisia_nl |  |  |  |  |  |  | 0.000 | -0.050 |
| PHiZZURP |  |  |  |  |  |  | 0.000 | -0.050 |
| Lonely_Dad |  |  |  |  |  |  | 0.000 | -0.050 |
| CaptainObvious |  |  |  |  |  |  | 0.001 | -0.050 |
| dcsportsbog |  |  |  |  |  |  | 0.005 | -0.050 |
| GoogleStore |  |  |  |  |  |  | 0.000 | -0.050 |
| costareports |  |  |  |  |  |  | 0.000 | -0.050 |
| LindseyStirling |  |  |  |  |  |  | 0.000 | -0.050 |
| AskRobinhood |  |  |  |  |  |  | 0.000 | -0.050 |
| sciencemagazine |  |  |  |  |  |  | 0.000 | -0.050 |
| ELEAGUETV |  |  |  |  |  |  | 0.000 | -0.050 |
| ErikVoorhees |  |  |  |  |  |  | 0.003 | -0.050 |
| WWEBigE |  |  |  |  |  |  | 0.000 | -0.050 |
| GoldenKnights |  |  |  |  |  |  | 0.000 | -0.045 |
| WhatHeLooksLike |  |  |  |  |  |  | 0.002 | -0.045 |
| cntrpntmusic |  |  |  |  |  |  | 0.007 | -0.045 |
| lollapalooza |  |  |  |  |  |  | 0.000 | -0.045 |
| Jesus_M_Christ |  |  |  |  |  |  | 0.000 | -0.045 |
| SeanLowe09 |  |  |  |  |  |  | 0.000 | -0.045 |
| GMA |  |  |  |  |  |  | 0.000 | -0.045 |
| mcsweeneys |  |  |  |  |  |  | 0.003 | -0.045 |
| PDLComics |  |  |  |  |  |  | 0.000 | -0.045 |
| JoelHeyman |  |  |  |  |  |  | 0.000 | -0.045 |
| SquidGrip |  |  |  |  |  |  | 0.000 | -0.045 |
| NRO |  |  |  |  |  |  | 0.000 | -0.045 |
| NissanUSA |  |  |  |  |  |  | 0.000 | -0.045 |
| aimeemann |  |  |  |  |  |  | 0.000 | -0.045 |
| SPACEdotcom |  |  |  |  |  |  | 0.000 | -0.045 |
| ThrifterDaily |  |  |  |  |  |  | 0.000 | -0.045 |
| StuBennett |  |  |  |  |  |  | 0.000 | -0.045 |
| ChristenPress |  |  |  |  |  |  | 0.000 | -0.045 |
| PopTartsUS |  |  |  |  |  |  | 0.000 | -0.045 |
| BHPhotoVideo |  |  |  |  |  |  | 0.000 | -0.045 |
| WWECesaro |  |  |  |  |  |  | 0.000 | -0.045 |
| MikeNapoli25 |  |  |  |  |  |  | 0.003 | -0.045 |
| KingCrab15 |  |  |  |  |  |  | 0.000 | -0.045 |
| MrRPMurphy |  |  |  |  |  |  | 0.000 | -0.045 |
| OMGitsfirefoxx |  |  |  |  |  |  | 0.000 | -0.045 |
| lawblob |  |  |  |  |  |  | 0.000 | -0.045 |
| daps |  |  |  |  |  |  | 0.000 | -0.045 |
| fugly |  |  |  |  |  |  | 0.000 | -0.045 |
| capitalcities |  |  |  |  |  |  | 0.000 | -0.045 |
| frankieboyle |  |  |  |  |  |  | 0.000 | -0.045 |
| NPRextra |  |  |  |  |  |  | 0.000 | -0.045 |
| bridger_w |  |  |  |  |  |  | 0.000 | -0.045 |
| kschwarb12 |  |  |  |  |  |  | 0.002 | -0.045 |
| iFooYa |  |  |  |  |  |  | 0.005 | -0.045 |
| JudahWorldChamp |  |  |  |  |  |  | 0.000 | -0.045 |
| danieldennett |  |  |  |  |  |  | 0.000 | -0.045 |
| ARizzo44 |  |  |  |  |  |  | 0.000 | -0.045 |
| NightInTheWoods |  |  |  |  |  |  | 0.000 | -0.039 |
| thepointsguy |  |  |  |  |  |  | 0.000 | -0.039 |
| Paragon |  |  |  |  |  |  | 0.000 | -0.039 |
| rob_swire |  |  |  |  |  |  | 0.000 | -0.039 |
| GabbySidibe |  |  |  |  |  |  | 0.006 | -0.039 |
| VinylMePlease |  |  |  |  |  |  | 0.000 | -0.039 |
| MoveTheSticks |  |  |  |  |  |  | 0.000 | -0.039 |
| HarvardBiz |  |  |  |  |  |  | 0.009 | -0.039 |
| killthenoise |  |  |  |  |  |  | 0.000 | -0.039 |
| theglitchmob |  |  |  |  |  |  | 0.003 | -0.039 |
| feministing |  |  |  |  |  |  | 0.000 | -0.039 |
| baseballreddit |  |  |  |  |  |  | 0.000 | -0.039 |
| HilLesha |  |  |  |  |  |  | 0.000 | -0.039 |
| BarillaUS |  |  |  |  |  |  | 0.000 | -0.039 |
| IanDarke |  |  |  |  |  |  | 0.004 | -0.039 |
| BenMank77 |  |  |  |  |  |  | 0.000 | -0.039 |
| coL_noxious |  |  |  |  |  |  | 0.000 | -0.039 |
| bbrode |  |  |  |  |  |  | 0.000 | -0.039 |
| DougPolkPoker |  |  |  |  |  |  | 0.000 | -0.039 |
| ReggieBush |  |  |  |  |  |  | 0.005 | -0.039 |
| PepsiMAX |  |  |  |  |  |  | 0.000 | -0.039 |
| kenzliee |  |  |  |  |  |  | 0.000 | -0.039 |
| sonicdrivein |  |  |  |  |  |  | 0.000 | -0.039 |
| HookedonFriends |  |  |  |  |  |  | 0.003 | -0.039 |
| HuffPostParents |  |  |  |  |  |  | 0.000 | -0.039 |
| 100Thieves |  |  |  |  |  |  | 0.000 | -0.039 |
| polkaudio |  |  |  |  |  |  | 0.000 | -0.039 |
| totalsratmove |  |  |  |  |  |  | 0.000 | -0.039 |
| AOL |  |  |  |  |  |  | 0.000 | -0.039 |
| JackJ |  |  |  |  |  |  | 0.000 | -0.039 |
| LA2028 |  |  |  |  |  |  | 0.000 | -0.039 |
| Taylors_Bar |  |  |  |  |  |  | 0.000 | -0.039 |
| Charmin |  |  |  |  |  |  | 0.000 | -0.039 |
| leepace |  |  |  |  |  |  | 0.000 | -0.039 |
| RookieMag |  |  |  |  |  |  | 0.000 | -0.039 |
| jcrasnick |  |  |  |  |  |  | 0.000 | -0.039 |
| TwitterSports |  |  |  |  |  |  | 0.000 | -0.039 |
| ramboray |  |  |  |  |  |  | 0.000 | -0.039 |
| BizNasty2point0 |  |  |  |  |  |  | 0.000 | -0.039 |
| SklarBrothers |  |  |  |  |  |  | 0.000 | -0.039 |
| Temperrr |  |  |  |  |  |  | 0.000 | -0.039 |
| FaZe_Rain |  |  |  |  |  |  | 0.000 | -0.039 |
| ingress |  |  |  |  |  |  | 0.000 | -0.039 |
| Androidheadline |  |  |  |  |  |  | 0.000 | -0.039 |
| NickSplat |  |  |  |  |  |  | 0.001 | -0.039 |
| TheRealJRSmith |  |  |  |  |  |  | 0.000 | -0.039 |
| ESPNLunardi |  |  |  |  |  |  | 0.004 | -0.039 |
| XavierWoodsPhD |  |  |  |  |  |  | 0.002 | -0.039 |
| BWWings |  |  |  |  |  |  | 0.001 | -0.039 |
| HealingMB |  |  |  |  |  |  | 0.000 | -0.039 |
| everydaylouie |  |  |  |  |  |  | 0.000 | -0.039 |
| SirLarr |  |  |  |  |  |  | 0.000 | -0.033 |
| TheJusticeDept |  |  |  |  |  |  | 0.000 | -0.033 |
| Seahawks |  |  |  |  |  |  | 0.000 | -0.033 |
| michiokaku |  |  |  |  |  |  | 0.000 | -0.033 |
| willsmith |  |  |  |  |  |  | 0.000 | -0.033 |
| sweden |  |  |  |  |  |  | 0.000 | -0.033 |
| SenatorReid |  |  |  |  |  |  | 0.005 | -0.033 |
| KFCBarstool |  |  |  |  |  |  | 0.000 | -0.033 |
| ohteenquotes |  |  |  |  |  |  | 0.000 | -0.033 |
| JackPosobiec |  |  |  |  |  |  | 0.000 | -0.033 |
| SierraNevada |  |  |  |  |  |  | 0.006 | -0.033 |
| QuestNutrition |  |  |  |  |  |  | 0.000 | -0.033 |
| TheJetOnTNT |  |  |  |  |  |  | 0.000 | -0.033 |
| dpshow |  |  |  |  |  |  | 0.000 | -0.033 |
| wunderground |  |  |  |  |  |  | 0.000 | -0.033 |
| Biofrostlol |  |  |  |  |  |  | 0.000 | -0.033 |
| pastebin |  |  |  |  |  |  | 0.000 | -0.033 |
| NipseyHussle |  |  |  |  |  |  | 0.000 | -0.033 |
| ShawnMendes |  |  |  |  |  |  | 0.000 | -0.033 |
| uo_phc |  |  |  |  |  |  | 0.000 | -0.033 |
| Ritzcrackers |  |  |  |  |  |  | 0.000 | -0.033 |
| NSYNC |  |  |  |  |  |  | 0.000 | -0.033 |
| fivefifths |  |  |  |  |  |  | 0.000 | -0.033 |
| hellcasecom |  |  |  |  |  |  | 0.000 | -0.033 |
| ShahZaMk |  |  |  |  |  |  | 0.000 | -0.033 |
| nytimesbooks |  |  |  |  |  |  | 0.000 | -0.033 |
| Wu_Tang_Finance |  |  |  |  |  |  | 0.000 | -0.033 |
| GHardstark |  |  |  |  |  |  | 0.000 | -0.033 |
| IanJamesPoulter |  |  |  |  |  |  | 0.002 | -0.033 |
| ComedyPosts |  |  |  |  |  |  | 0.000 | -0.033 |
| hypem |  |  |  |  |  |  | 0.000 | -0.033 |
| Snapple |  |  |  |  |  |  | 0.000 | -0.033 |
| FaZeJev |  |  |  |  |  |  | 0.000 | -0.033 |
| DotEsportsLive |  |  |  |  |  |  | 0.000 | -0.033 |
| Crayola |  |  |  |  |  |  | 0.000 | -0.033 |
| kelleymohara |  |  |  |  |  |  | 0.000 | -0.033 |
| gates_mcfadden |  |  |  |  |  |  | 0.000 | -0.033 |
| BNBuzz |  |  |  |  |  |  | 0.000 | -0.033 |
| EsportsArena |  |  |  |  |  |  | 0.000 | -0.033 |
| sex |  |  |  |  |  |  | 0.000 | -0.033 |
| DrPhiltill |  |  |  |  |  |  | 0.000 | -0.033 |
| jilevin |  |  |  |  |  |  | 0.000 | -0.033 |
| klei |  |  |  |  |  |  | 0.007 | -0.033 |
| RippleStreetFun |  |  |  |  |  |  | 0.000 | -0.033 |
| OliverPhelps |  |  |  |  |  |  | 0.000 | -0.033 |
| Pornhub |  |  |  |  |  |  | 0.000 | -0.033 |
| Lootably |  |  |  |  |  |  | 0.000 | -0.033 |
| MonsterGaming |  |  |  |  |  |  | 0.000 | -0.033 |
| newyorkpsychic |  |  |  |  |  |  | 0.000 | -0.033 |
| alexisbledel |  |  |  |  |  |  | 0.001 | -0.033 |
| jackwhitehall |  |  |  |  |  |  | 0.000 | -0.033 |
| gregorybrothers |  |  |  |  |  |  | 0.000 | -0.033 |
| IAmCreeSummer |  |  |  |  |  |  | 0.000 | -0.033 |
| SUP3RFRUIT |  |  |  |  |  |  | 0.000 | -0.027 |
| baratunde |  |  |  |  |  |  | 0.000 | -0.027 |
| josealdojunior |  |  |  |  |  |  | 0.000 | -0.027 |
| Goldust |  |  |  |  |  |  | 0.000 | -0.027 |
| Topps |  |  |  |  |  |  | 0.000 | -0.027 |
| PEOPLEGiveaways |  |  |  |  |  |  | 0.000 | -0.027 |
| JoyceCarolOates |  |  |  |  |  |  | 0.002 | -0.027 |
| ozonegaming |  |  |  |  |  |  | 0.000 | -0.027 |
| ONOGesports |  |  |  |  |  |  | 0.001 | -0.027 |
| thiseverydaymom |  |  |  |  |  |  | 0.000 | -0.027 |
| spurs |  |  |  |  |  |  | 0.000 | -0.027 |
| RealBenBailey |  |  |  |  |  |  | 0.000 | -0.027 |
| TwitterMusic |  |  |  |  |  |  | 0.000 | -0.027 |
| RicBucher |  |  |  |  |  |  | 0.003 | -0.027 |
| JacLaurita |  |  |  |  |  |  | 0.000 | -0.027 |
| JaredDudley619 |  |  |  |  |  |  | 0.001 | -0.027 |
| JugglinJosh |  |  |  |  |  |  | 0.000 | -0.027 |
| romanmars |  |  |  |  |  |  | 0.003 | -0.027 |
| Cosmopolitan |  |  |  |  |  |  | 0.001 | -0.027 |
| DavidMuir |  |  |  |  |  |  | 0.006 | -0.027 |
| CourtyardHotels |  |  |  |  |  |  | 0.000 | -0.027 |
| FireflySpirits |  |  |  |  |  |  | 0.000 | -0.027 |
| ChrchCurmudgeon |  |  |  |  |  |  | 0.000 | -0.027 |
| OXM |  |  |  |  |  |  | 0.000 | -0.027 |
| DanaPerino |  |  |  |  |  |  | 0.007 | -0.027 |
| michellemalkin |  |  |  |  |  |  | 0.000 | -0.027 |
| samesmail |  |  |  |  |  |  | 0.000 | -0.027 |
| FreebieDepot |  |  |  |  |  |  | 0.001 | -0.027 |
| DemetriusHarmon |  |  |  |  |  |  | 0.000 | -0.027 |
| Blogger |  |  |  |  |  |  | 0.000 | -0.027 |
| ThingsWork |  |  |  |  |  |  | 0.000 | -0.027 |
| SovietWomble |  |  |  |  |  |  | 0.000 | -0.027 |
| fosterthepeople |  |  |  |  |  |  | 0.000 | -0.027 |
| Alesso |  |  |  |  |  |  | 0.000 | -0.027 |
| HoustonRockets |  |  |  |  |  |  | 0.000 | -0.027 |
| OfficialEGL |  |  |  |  |  |  | 0.001 | -0.027 |
| DisneylandToday |  |  |  |  |  |  | 0.000 | -0.027 |
| ESPNChiCubs |  |  |  |  |  |  | 0.000 | -0.027 |
| TheKurtFuller |  |  |  |  |  |  | 0.000 | -0.027 |
| AJStylesOrg |  |  |  |  |  |  | 0.000 | -0.027 |
| ericchurch |  |  |  |  |  |  | 0.000 | -0.027 |
| DrLupo |  |  |  |  |  |  | 0.000 | -0.027 |
| itsmejono |  |  |  |  |  |  | 0.000 | -0.027 |
| Criterion |  |  |  |  |  |  | 0.000 | -0.027 |
| BoyzIIMen |  |  |  |  |  |  | 0.000 | -0.027 |
| HPdeals |  |  |  |  |  |  | 0.000 | -0.027 |
| virgiltexas |  |  |  |  |  |  | 0.000 | -0.027 |
| CallumSwanny |  |  |  |  |  |  | 0.000 | -0.027 |
| DexertoIntel |  |  |  |  |  |  | 0.000 | -0.027 |
| Benson_EU |  |  |  |  |  |  | 0.000 | -0.027 |
| ScottGandhi |  |  |  |  |  |  | 0.000 | -0.027 |
| MattMrX |  |  |  |  |  |  | 0.000 | -0.027 |
| Maven |  |  |  |  |  |  | 0.000 | -0.027 |
| Censor |  |  |  |  |  |  | 0.000 | -0.027 |
| ACHES |  |  |  |  |  |  | 0.000 | -0.027 |
| TylerTeeP |  |  |  |  |  |  | 0.000 | -0.027 |
| ATVIAssist |  |  |  |  |  |  | 0.000 | -0.027 |
| djacoby |  |  |  |  |  |  | 0.000 | -0.027 |
| arcadefire |  |  |  |  |  |  | 0.000 | -0.027 |
| Ricky |  |  |  |  |  |  | 0.000 | -0.027 |
| OpTicDi3seL |  |  |  |  |  |  | 0.000 | -0.027 |
| CRAZYMIKESDEALS |  |  |  |  |  |  | 0.000 | -0.022 |
| Millbeeful |  |  |  |  |  |  | 0.000 | -0.022 |
| BBCNews |  |  |  |  |  |  | 0.000 | -0.022 |
| nikewomen |  |  |  |  |  |  | 0.000 | -0.022 |
| MoiraDonegan |  |  |  |  |  |  | 0.000 | -0.022 |
| bransonreese |  |  |  |  |  |  | 0.000 | -0.022 |
| elijahdaniel |  |  |  |  |  |  | 0.000 | -0.022 |
| Racheldoesstuff |  |  |  |  |  |  | 0.000 | -0.022 |
| EugeneLeeYang |  |  |  |  |  |  | 0.000 | -0.022 |
| Amazing_Maps |  |  |  |  |  |  | 0.000 | -0.022 |
| Avicii |  |  |  |  |  |  | 0.002 | -0.022 |
| AllStarGame |  |  |  |  |  |  | 0.000 | -0.022 |
| juliensolomita |  |  |  |  |  |  | 0.000 | -0.022 |
| id_828706394073395201 |  |  |  |  |  |  | 0.001 | -0.022 |
| YahooAnswersTXT |  |  |  |  |  |  | 0.000 | -0.022 |
| LarryFitzgerald |  |  |  |  |  |  | 0.000 | -0.022 |
| OsricChau |  |  |  |  |  |  | 0.000 | -0.022 |
| NOTSportsCenter |  |  |  |  |  |  | 0.000 | -0.022 |
| TheFPShow |  |  |  |  |  |  | 0.000 | -0.022 |
| NatGeoChannel |  |  |  |  |  |  | 0.000 | -0.022 |
| jennaezarik |  |  |  |  |  |  | 0.000 | -0.022 |
| joshuadun |  |  |  |  |  |  | 0.000 | -0.022 |
| nicekicks |  |  |  |  |  |  | 0.000 | -0.022 |
| jaboukie |  |  |  |  |  |  | 0.000 | -0.022 |
| melissagira |  |  |  |  |  |  | 0.000 | -0.022 |
| V_of_Europe |  |  |  |  |  |  | 0.000 | -0.022 |
| OneRepublic |  |  |  |  |  |  | 0.000 | -0.022 |
| ashleesimpson |  |  |  |  |  |  | 0.000 | -0.022 |
| OpTicMaNiaC |  |  |  |  |  |  | 0.000 | -0.022 |
| Banks |  |  |  |  |  |  | 0.000 | -0.022 |
| Pamaj |  |  |  |  |  |  | 0.001 | -0.022 |
| starbucksgold |  |  |  |  |  |  | 0.000 | -0.022 |
| GCTigerTracker |  |  |  |  |  |  | 0.000 | -0.022 |
| SwagBucksTricks |  |  |  |  |  |  | 0.000 | -0.022 |
| phrasesfla |  |  |  |  |  |  | 0.000 | -0.022 |
| dreckbaerfrau |  |  |  |  |  |  | 0.000 | -0.022 |
| JimHarris |  |  |  |  |  |  | 0.003 | -0.022 |
| ReedTimmerAccu |  |  |  |  |  |  | 0.000 | -0.022 |
| NairoMK |  |  |  |  |  |  | 0.000 | -0.022 |
| FlT_MOTIVATION |  |  |  |  |  |  | 0.000 | -0.022 |
| teamfourstar |  |  |  |  |  |  | 0.000 | -0.022 |
| gamespite |  |  |  |  |  |  | 0.000 | -0.022 |
| SpotifyCares |  |  |  |  |  |  | 0.000 | -0.022 |
| EpsonAmerica |  |  |  |  |  |  | 0.000 | -0.022 |
| devolverdigital |  |  |  |  |  |  | 0.000 | -0.022 |
| oculus |  |  |  |  |  |  | 0.000 | -0.022 |
| nprmusic |  |  |  |  |  |  | 0.000 | -0.022 |
| id_820681010438246401 |  |  |  |  |  |  | 0.001 | -0.022 |
| NormalTweetGuy |  |  |  |  |  |  | 0.000 | -0.022 |
| MikeIsaac |  |  |  |  |  |  | 0.000 | -0.022 |
| NoContextAds |  |  |  |  |  |  | 0.000 | -0.022 |
| sushitrash |  |  |  |  |  |  | 0.000 | -0.022 |
| AskDrRuth |  |  |  |  |  |  | 0.000 | -0.022 |
| dogfishbeer |  |  |  |  |  |  | 0.000 | -0.022 |
| austinnotduncan |  |  |  |  |  |  | 0.000 | -0.022 |
| Newsweek |  |  |  |  |  |  | 0.000 | -0.022 |
| pwnallthethings |  |  |  |  |  |  | 0.000 | -0.022 |
| TeamStarKid |  |  |  |  |  |  | 0.000 | -0.022 |
| bombsfall |  |  |  |  |  |  | 0.000 | -0.016 |
| wd_black |  |  |  |  |  |  | 0.000 | -0.016 |
| earthformed |  |  |  |  |  |  | 0.000 | -0.016 |
| CoolChillMom |  |  |  |  |  |  | 0.000 | -0.016 |
| RWitherspoon |  |  |  |  |  |  | 0.000 | -0.016 |
| GirlsWhoCode |  |  |  |  |  |  | 0.005 | -0.016 |
| gankstrr |  |  |  |  |  |  | 0.000 | -0.016 |
| NASAJPL |  |  |  |  |  |  | 0.000 | -0.016 |
| ElyseWillems |  |  |  |  |  |  | 0.001 | -0.016 |
| PandaExpress |  |  |  |  |  |  | 0.000 | -0.016 |
| waypoint |  |  |  |  |  |  | 0.000 | -0.016 |
| AdventureDub |  |  |  |  |  |  | 0.000 | -0.016 |
| KappaVelvit |  |  |  |  |  |  | 0.000 | -0.016 |
| VinnyCaravella |  |  |  |  |  |  | 0.000 | -0.016 |
| bradshoemaker |  |  |  |  |  |  | 0.000 | -0.016 |
| DudePerfect |  |  |  |  |  |  | 0.000 | -0.016 |
| KennedyNation |  |  |  |  |  |  | 0.000 | -0.016 |
| LTCFoundation |  |  |  |  |  |  | 0.000 | -0.016 |
| waitwait |  |  |  |  |  |  | 0.000 | -0.016 |
| adam22 |  |  |  |  |  |  | 0.000 | -0.016 |
| AnthonyDiComo |  |  |  |  |  |  | 0.000 | -0.016 |
| Dutch_Oven45 |  |  |  |  |  |  | 0.000 | -0.016 |
| krauthammer |  |  |  |  |  |  | 0.000 | -0.016 |
| utsadeli |  |  |  |  |  |  | 0.000 | -0.016 |
| richarddeitsch |  |  |  |  |  |  | 0.000 | -0.016 |
| DetroitRedWings |  |  |  |  |  |  | 0.006 | -0.016 |
| big_ben_clock |  |  |  |  |  |  | 0.000 | -0.016 |
| theyearofelan |  |  |  |  |  |  | 0.000 | -0.016 |
| Raspberry_Pi |  |  |  |  |  |  | 0.000 | -0.016 |
| DellOutlet |  |  |  |  |  |  | 0.000 | -0.016 |
| COPA90US |  |  |  |  |  |  | 0.000 | -0.016 |
| TheTechSlugs |  |  |  |  |  |  | 0.000 | -0.016 |
| LeVeonBell |  |  |  |  |  |  | 0.000 | -0.016 |
| IamEnidColeslaw |  |  |  |  |  |  | 0.000 | -0.016 |
| mineifiwildout |  |  |  |  |  |  | 0.000 | -0.016 |
| ZellnerLaw |  |  |  |  |  |  | 0.000 | -0.016 |
| MommyMusings |  |  |  |  |  |  | 0.000 | -0.016 |
| Brett_McMurphy |  |  |  |  |  |  | 0.000 | -0.016 |
| cbfowler |  |  |  |  |  |  | 0.002 | -0.016 |
| wossy |  |  |  |  |  |  | 0.000 | -0.016 |
| Iumbridge |  |  |  |  |  |  | 0.000 | -0.016 |
| Tempo_Storm |  |  |  |  |  |  | 0.000 | -0.016 |
| CrimMinds_CBS |  |  |  |  |  |  | 0.000 | -0.016 |
| AOC_Gaming |  |  |  |  |  |  | 0.000 | -0.016 |
| Renegades |  |  |  |  |  |  | 0.000 | -0.016 |
| SeanAstin |  |  |  |  |  |  | 0.000 | -0.016 |
| ShelitaBurke |  |  |  |  |  |  | 0.001 | -0.016 |
| stras37 |  |  |  |  |  |  | 0.000 | -0.016 |
| CFBPlayoff |  |  |  |  |  |  | 0.000 | -0.016 |
| DanicaPatrick |  |  |  |  |  |  | 0.000 | -0.016 |
| AmazonStudios |  |  |  |  |  |  | 0.001 | -0.016 |
| AdamParkhomenko |  |  |  |  |  |  | 0.000 | -0.016 |
| TimTurnerMusic |  |  |  |  |  |  | 0.000 | -0.016 |
| dan_aykroyd |  |  |  |  |  |  | 0.000 | -0.016 |
| OlanRogers |  |  |  |  |  |  | 0.000 | -0.016 |
| marshawright |  |  |  |  |  |  | 0.000 | -0.016 |
| carlywaddell |  |  |  |  |  |  | 0.000 | -0.016 |
| AmazingPhil |  |  |  |  |  |  | 0.000 | -0.016 |
| shopDisney |  |  |  |  |  |  | 0.000 | -0.016 |
| andre |  |  |  |  |  |  | 0.000 | -0.016 |
| mikefossey |  |  |  |  |  |  | 0.000 | -0.016 |
| shibleysmiles |  |  |  |  |  |  | 0.000 | -0.016 |
| Freebies4Mom |  |  |  |  |  |  | 0.000 | -0.016 |
| PERIDOT5XG |  |  |  |  |  |  | 0.000 | -0.016 |
| Ashton5SOS |  |  |  |  |  |  | 0.000 | -0.016 |
| NathanSykes |  |  |  |  |  |  | 0.000 | -0.016 |
| Fyre_flye |  |  |  |  |  |  | 0.000 | -0.016 |
| TreasureTrooper |  |  |  |  |  |  | 0.000 | -0.010 |
| edutopia |  |  |  |  |  |  | 0.000 | -0.010 |
| evan_breen |  |  |  |  |  |  | 0.000 | -0.010 |
| Ford |  |  |  |  |  |  | 0.000 | -0.010 |
| theMrMobile |  |  |  |  |  |  | 0.000 | -0.010 |
| ArielDumas |  |  |  |  |  |  | 0.000 | -0.010 |
| lizzwinstead |  |  |  |  |  |  | 0.000 | -0.010 |
| dapwell |  |  |  |  |  |  | 0.001 | -0.010 |
| PopMech |  |  |  |  |  |  | 0.000 | -0.010 |
| thriftyniftymom |  |  |  |  |  |  | 0.000 | -0.010 |
| ChiliPeppers |  |  |  |  |  |  | 0.006 | -0.010 |
| SampleSource |  |  |  |  |  |  | 0.000 | -0.010 |
| paulfeig |  |  |  |  |  |  | 0.005 | -0.010 |
| c9meteosego |  |  |  |  |  |  | 0.004 | -0.010 |
| SFShock |  |  |  |  |  |  | 0.000 | -0.010 |
| DominickCruz |  |  |  |  |  |  | 0.000 | -0.010 |
| IStandWithAhmed |  |  |  |  |  |  | 0.002 | -0.010 |
| TheStrainFX |  |  |  |  |  |  | 0.000 | -0.010 |
| LiQuiD112 |  |  |  |  |  |  | 0.000 | -0.010 |
| piercethevic |  |  |  |  |  |  | 0.000 | -0.010 |
| joe_keery |  |  |  |  |  |  | 0.000 | -0.010 |
| PCPartPicker |  |  |  |  |  |  | 0.000 | -0.010 |
| Photoshop |  |  |  |  |  |  | 0.000 | -0.010 |
| eveewing |  |  |  |  |  |  | 0.000 | -0.010 |
| CitiField |  |  |  |  |  |  | 0.000 | -0.010 |
| MLBMeme |  |  |  |  |  |  | 0.000 | -0.010 |
| AriFleischer |  |  |  |  |  |  | 0.000 | -0.010 |
| leolaporte |  |  |  |  |  |  | 0.000 | -0.010 |
| AndrewBrandt |  |  |  |  |  |  | 0.000 | -0.010 |
| TweetDeleter |  |  |  |  |  |  | 0.000 | -0.010 |
| StevenSuptic |  |  |  |  |  |  | 0.000 | -0.010 |
| ovi8 |  |  |  |  |  |  | 0.000 | -0.010 |
| shelbyfero |  |  |  |  |  |  | 0.000 | -0.010 |
| amomsimpression |  |  |  |  |  |  | 0.000 | -0.010 |
| JeffreyHayzlett |  |  |  |  |  |  | 0.000 | -0.010 |
| TheJamieLee |  |  |  |  |  |  | 0.000 | -0.010 |
| id_704839948722024449 |  |  |  |  |  |  | 0.000 | -0.010 |
| JonVilma51 |  |  |  |  |  |  | 0.000 | -0.010 |
| PrayInFaith |  |  |  |  |  |  | 0.000 | -0.010 |
| OTruta |  |  |  |  |  |  | 0.000 | -0.010 |
| Stess2005 |  |  |  |  |  |  | 0.000 | -0.010 |
| SupergiantGames |  |  |  |  |  |  | 0.000 | -0.010 |
| robfee |  |  |  |  |  |  | 0.003 | -0.010 |
| m0E_tv |  |  |  |  |  |  | 0.000 | -0.010 |
| DraftExpress |  |  |  |  |  |  | 0.000 | -0.010 |
| nickcarter |  |  |  |  |  |  | 0.000 | -0.010 |
| jcpenney |  |  |  |  |  |  | 0.000 | -0.010 |
| SheriffClarke |  |  |  |  |  |  | 0.000 | -0.010 |
| kimguilfoyle |  |  |  |  |  |  | 0.000 | -0.010 |
| PhilLaak |  |  |  |  |  |  | 0.000 | -0.010 |
| MagicAntonio |  |  |  |  |  |  | 0.000 | -0.010 |
| dev1ce |  |  |  |  |  |  | 0.001 | -0.010 |
| EmergencyPugs |  |  |  |  |  |  | 0.002 | -0.010 |
| MeCookieMonster |  |  |  |  |  |  | 0.000 | -0.010 |
| allisonkilkenny |  |  |  |  |  |  | 0.000 | -0.010 |
| DatelineNBC |  |  |  |  |  |  | 0.000 | -0.010 |
| morningmika |  |  |  |  |  |  | 0.002 | -0.010 |
| AppleSupport |  |  |  |  |  |  | 0.000 | -0.010 |
| TitanicRealTime |  |  |  |  |  |  | 0.000 | -0.010 |
| hexytv |  |  |  |  |  |  | 0.000 | -0.010 |
| mytoecold |  |  |  |  |  |  | 0.003 | -0.010 |
| MiloVentimiglia |  |  |  |  |  |  | 0.000 | -0.010 |
| OMGitsAliA |  |  |  |  |  |  | 0.000 | -0.010 |
| blockchain |  |  |  |  |  |  | 0.000 | -0.010 |
| warnerbrostv |  |  |  |  |  |  | 0.004 | -0.010 |
| JordyRNelson |  |  |  |  |  |  | 0.000 | -0.010 |
| 5SOS |  |  |  |  |  |  | 0.000 | -0.010 |
| Toyota |  |  |  |  |  |  | 0.000 | -0.010 |
| codinghorror |  |  |  |  |  |  | 0.000 | -0.004 |
| MarthaPlimpton |  |  |  |  |  |  | 0.000 | -0.004 |
| SertaMattresses |  |  |  |  |  |  | 0.000 | -0.004 |
| tsue1136 |  |  |  |  |  |  | 0.000 | -0.004 |
| valerie2350 |  |  |  |  |  |  | 0.000 | -0.004 |
| MommysFavThings |  |  |  |  |  |  | 0.000 | -0.004 |
| TeamKhabib |  |  |  |  |  |  | 0.000 | -0.004 |
| MightyMouse |  |  |  |  |  |  | 0.000 | -0.004 |
| Tellwut |  |  |  |  |  |  | 0.000 | -0.004 |
| NintenDome |  |  |  |  |  |  | 0.000 | -0.004 |
| chrisweidman |  |  |  |  |  |  | 0.000 | -0.004 |
| BlizzPro |  |  |  |  |  |  | 0.000 | -0.004 |
| Kandi |  |  |  |  |  |  | 0.000 | -0.004 |
| McJesse |  |  |  |  |  |  | 0.000 | -0.004 |
| StartupLJackson |  |  |  |  |  |  | 0.000 | -0.004 |
| Linux |  |  |  |  |  |  | 0.000 | -0.004 |
| TimGettys |  |  |  |  |  |  | 0.000 | -0.004 |
| Nick_Scarpino |  |  |  |  |  |  | 0.000 | -0.004 |
| googlefiber |  |  |  |  |  |  | 0.000 | -0.004 |
| hhgregg |  |  |  |  |  |  | 0.000 | -0.004 |
| WakaFlocka |  |  |  |  |  |  | 0.000 | -0.004 |
| DreamHackCSGO |  |  |  |  |  |  | 0.000 | -0.004 |
| MintMilana |  |  |  |  |  |  | 0.000 | -0.004 |
| JohnFugelsang |  |  |  |  |  |  | 0.000 | -0.004 |
| JohnKerry |  |  |  |  |  |  | 0.000 | -0.004 |
| altgeldshrugged |  |  |  |  |  |  | 0.000 | -0.004 |
| Earnably |  |  |  |  |  |  | 0.000 | -0.004 |
| TheMercedesXXX |  |  |  |  |  |  | 0.003 | -0.004 |
| michaelstrahan |  |  |  |  |  |  | 0.000 | -0.004 |
| GooseIsland |  |  |  |  |  |  | 0.000 | -0.004 |
| CommunityCoffee |  |  |  |  |  |  | 0.000 | -0.004 |
| litecoin |  |  |  |  |  |  | 0.000 | -0.004 |
| haralabob |  |  |  |  |  |  | 0.000 | -0.004 |
| TheSilphRoad |  |  |  |  |  |  | 0.000 | -0.004 |
| DomsWildThings |  |  |  |  |  |  | 0.000 | -0.004 |
| Wwm_Shakespeare |  |  |  |  |  |  | 0.000 | -0.004 |
| PapaRandlicious |  |  |  |  |  |  | 0.000 | -0.004 |
| tastemade |  |  |  |  |  |  | 0.003 | -0.004 |
| MRodOfficial |  |  |  |  |  |  | 0.000 | -0.004 |
| camerondallas |  |  |  |  |  |  | 0.000 | -0.004 |
| DanGlover1 |  |  |  |  |  |  | 0.000 | -0.004 |
| MelDMann |  |  |  |  |  |  | 0.000 | -0.004 |
| MurderFirstTNT |  |  |  |  |  |  | 0.000 | -0.004 |
| Swiftor |  |  |  |  |  |  | 0.000 | -0.004 |
| GeorgesStPierre |  |  |  |  |  |  | 0.000 | -0.004 |
| AndroidDev |  |  |  |  |  |  | 0.000 | -0.004 |
| SKGaming |  |  |  |  |  |  | 0.000 | -0.004 |
| MisfitsGG |  |  |  |  |  |  | 0.000 | -0.004 |
| AynRandPaulRyan |  |  |  |  |  |  | 0.000 | -0.004 |
| KatTimpf |  |  |  |  |  |  | 0.000 | -0.004 |
| insomniacevents |  |  |  |  |  |  | 0.004 | -0.004 |
| Nelly_Mo |  |  |  |  |  |  | 0.000 | -0.004 |
| jonmorosi |  |  |  |  |  |  | 0.000 | -0.004 |
| masonramsey |  |  |  |  |  |  | 0.002 | -0.004 |
| TheTedAllen |  |  |  |  |  |  | 0.000 | -0.004 |
| JeffBezos |  |  |  |  |  |  | 0.000 | -0.004 |
| sonofbum |  |  |  |  |  |  | 0.000 | -0.004 |
| dcshoes |  |  |  |  |  |  | 0.000 | -0.004 |
| lindeelink |  |  |  |  |  |  | 0.000 | -0.004 |
| Lov3rzMagazine |  |  |  |  |  |  | 0.000 | -0.004 |
| SoundHub |  |  |  |  |  |  | 0.000 | -0.004 |
| idclrWorldPeace |  |  |  |  |  |  | 0.000 | -0.004 |
| TheFray |  |  |  |  |  |  | 0.000 | -0.004 |
| REACTlVE |  |  |  |  |  |  | 0.000 | -0.004 |
| stunna |  |  |  |  |  |  | 0.000 | -0.004 |
| PhantomL0rd |  |  |  |  |  |  | 0.000 | -0.004 |
| Sears |  |  |  |  |  |  | 0.000 | -0.004 |
| MSFTnews |  |  |  |  |  |  | 0.000 | -0.004 |
| chrisbosh |  |  |  |  |  |  | 0.000 | -0.004 |
| JennaUshkowitz |  |  |  |  |  |  | 0.000 | -0.004 |
| OmahaSteaks |  |  |  |  |  |  | 0.001 | -0.004 |
| DilfersDimes |  |  |  |  |  |  | 0.000 | -0.004 |
| Ron_White |  |  |  |  |  |  | 0.000 | -0.004 |
| nedroid |  |  |  |  |  |  | 0.000 | -0.004 |
| TheMuppets |  |  |  |  |  |  | 0.000 | -0.004 |
| RWPUSA |  |  |  |  |  |  | 0.000 | -0.004 |
| infinitechan |  |  |  |  |  |  | 0.000 | 0.002 |
| DeathStarPR |  |  |  |  |  |  | 0.000 | 0.002 |
| nkjemisin |  |  |  |  |  |  | 0.000 | 0.002 |
| AlannaMasterson |  |  |  |  |  |  | 0.000 | 0.002 |
| kateesackhoff |  |  |  |  |  |  | 0.000 | 0.002 |
| NightHelperBlog |  |  |  |  |  |  | 0.000 | 0.002 |
| mametown |  |  |  |  |  |  | 0.000 | 0.002 |
| AstroSamantha |  |  |  |  |  |  | 0.000 | 0.002 |
| RahulKohli13 |  |  |  |  |  |  | 0.000 | 0.002 |
| ellefsondavid |  |  |  |  |  |  | 0.000 | 0.002 |
| Anthrax |  |  |  |  |  |  | 0.000 | 0.002 |
| Megadeth |  |  |  |  |  |  | 0.006 | 0.002 |
| ZakkWyldeBLS |  |  |  |  |  |  | 0.000 | 0.002 |
| Chris_Broderick |  |  |  |  |  |  | 0.000 | 0.002 |
| DaveMustaine |  |  |  |  |  |  | 0.000 | 0.002 |
| KOlusola |  |  |  |  |  |  | 0.003 | 0.002 |
| ftrain |  |  |  |  |  |  | 0.000 | 0.002 |
| kevinburkhardt |  |  |  |  |  |  | 0.000 | 0.002 |
| The7Line |  |  |  |  |  |  | 0.000 | 0.002 |
| mikepiazza31 |  |  |  |  |  |  | 0.000 | 0.002 |
| MattHarvey33 |  |  |  |  |  |  | 0.000 | 0.002 |
| MetsGM |  |  |  |  |  |  | 0.000 | 0.002 |
| DineshDSouza |  |  |  |  |  |  | 0.000 | 0.002 |
| CharlesRobinson |  |  |  |  |  |  | 0.000 | 0.002 |
| tinynietzsche |  |  |  |  |  |  | 0.000 | 0.002 |
| GadSaad |  |  |  |  |  |  | 0.000 | 0.002 |
| classymommy |  |  |  |  |  |  | 0.000 | 0.002 |
| diamondcandles |  |  |  |  |  |  | 0.000 | 0.002 |
| SweepsDBCom |  |  |  |  |  |  | 0.000 | 0.002 |
| MetroDetroitMom |  |  |  |  |  |  | 0.000 | 0.002 |
| tieks |  |  |  |  |  |  | 0.000 | 0.002 |
| towelthetank |  |  |  |  |  |  | 0.000 | 0.002 |
| PC_Gamer |  |  |  |  |  |  | 0.000 | 0.002 |
| Strippin |  |  |  |  |  |  | 0.000 | 0.002 |
| jungledealsblog |  |  |  |  |  |  | 0.000 | 0.002 |
| MonsterProducts |  |  |  |  |  |  | 0.000 | 0.002 |
| FormerlyZappos |  |  |  |  |  |  | 0.000 | 0.002 |
| MetalHammer |  |  |  |  |  |  | 0.000 | 0.002 |
| RalphLauren |  |  |  |  |  |  | 0.000 | 0.002 |
| EmrgencyKittens |  |  |  |  |  |  | 0.000 | 0.002 |
| dishonored |  |  |  |  |  |  | 0.000 | 0.002 |
| CookOut |  |  |  |  |  |  | 0.000 | 0.002 |
| Teeanderson01 |  |  |  |  |  |  | 0.000 | 0.002 |
| NoelClarke |  |  |  |  |  |  | 0.000 | 0.002 |
| missmorenab |  |  |  |  |  |  | 0.000 | 0.002 |
| LilJon |  |  |  |  |  |  | 0.000 | 0.002 |
| id_415878475 |  |  |  |  |  |  | 0.000 | 0.002 |
| iamoppose |  |  |  |  |  |  | 0.000 | 0.002 |
| kilokeal |  |  |  |  |  |  | 0.000 | 0.002 |
| ChrisRGun |  |  |  |  |  |  | 0.000 | 0.002 |
| NeverNotFunny |  |  |  |  |  |  | 0.000 | 0.002 |
| EAMobile |  |  |  |  |  |  | 0.000 | 0.002 |
| ItGetsBetter |  |  |  |  |  |  | 0.000 | 0.002 |
| shabbyapple |  |  |  |  |  |  | 0.000 | 0.002 |
| ProfBrianCox |  |  |  |  |  |  | 0.000 | 0.002 |
| AronsThoughts |  |  |  |  |  |  | 0.000 | 0.002 |
| JodieSweetin |  |  |  |  |  |  | 0.000 | 0.002 |
| steamykitchen |  |  |  |  |  |  | 0.000 | 0.002 |
| joshuagates |  |  |  |  |  |  | 0.001 | 0.002 |
| eliroth |  |  |  |  |  |  | 0.000 | 0.002 |
| EricIdle |  |  |  |  |  |  | 0.000 | 0.002 |
| montypython |  |  |  |  |  |  | 0.000 | 0.002 |
| theroots |  |  |  |  |  |  | 0.000 | 0.002 |
| Rogue |  |  |  |  |  |  | 0.000 | 0.002 |
| davemeltzerWON |  |  |  |  |  |  | 0.000 | 0.002 |
| DearAuntCrabby |  |  |  |  |  |  | 0.000 | 0.002 |
| SBNationGIF |  |  |  |  |  |  | 0.000 | 0.002 |
| EarnKnowledge |  |  |  |  |  |  | 0.000 | 0.002 |
| Doritos |  |  |  |  |  |  | 0.000 | 0.002 |
| Bengals |  |  |  |  |  |  | 0.000 | 0.002 |
| billboard |  |  |  |  |  |  | 0.000 | 0.002 |
| aarongreenberg |  |  |  |  |  |  | 0.000 | 0.002 |
| thegameawards |  |  |  |  |  |  | 0.000 | 0.002 |
| grumpygamer |  |  |  |  |  |  | 0.000 | 0.002 |
| GlenSchofield |  |  |  |  |  |  | 0.001 | 0.002 |
| rogerkver |  |  |  |  |  |  | 0.000 | 0.002 |
| HCS |  |  |  |  |  |  | 0.003 | 0.002 |
| TurkerNational |  |  |  |  |  |  | 0.000 | 0.002 |
| AnthonyHopkins |  |  |  |  |  |  | 0.000 | 0.002 |
| subpop |  |  |  |  |  |  | 0.000 | 0.002 |
| BaskinRobbins |  |  |  |  |  |  | 0.000 | 0.002 |
| mtvgames |  |  |  |  |  |  | 0.000 | 0.002 |
| boostmobile |  |  |  |  |  |  | 0.000 | 0.002 |
| kraftrecipes |  |  |  |  |  |  | 0.000 | 0.002 |
| FreemaOfficial |  |  |  |  |  |  | 0.000 | 0.002 |
| GreyDeLisle |  |  |  |  |  |  | 0.000 | 0.002 |
| VsauceThree |  |  |  |  |  |  | 0.000 | 0.007 |
| BestVlNES |  |  |  |  |  |  | 0.000 | 0.007 |
| rimmellondonUS |  |  |  |  |  |  | 0.000 | 0.007 |
| FTB_Team |  |  |  |  |  |  | 0.006 | 0.007 |
| XGames |  |  |  |  |  |  | 0.000 | 0.007 |
| brutalmoose |  |  |  |  |  |  | 0.000 | 0.007 |
| TKbreezy |  |  |  |  |  |  | 0.000 | 0.007 |
| CountVonCount |  |  |  |  |  |  | 0.000 | 0.007 |
| dailyzen |  |  |  |  |  |  | 0.000 | 0.007 |
| rpetrich |  |  |  |  |  |  | 0.000 | 0.007 |
| Chargers |  |  |  |  |  |  | 0.000 | 0.007 |
| Eastbay |  |  |  |  |  |  | 0.000 | 0.007 |
| skinhub |  |  |  |  |  |  | 0.000 | 0.007 |
| RonnieFieg |  |  |  |  |  |  | 0.000 | 0.007 |
| JamesKyson |  |  |  |  |  |  | 0.000 | 0.007 |
| EmazingLights |  |  |  |  |  |  | 0.000 | 0.007 |
| GrrrGraphics |  |  |  |  |  |  | 0.000 | 0.007 |
| Cardinals |  |  |  |  |  |  | 0.001 | 0.007 |
| dose |  |  |  |  |  |  | 0.000 | 0.007 |
| PowerbyMomBlog |  |  |  |  |  |  | 0.000 | 0.007 |
| PeteSouza |  |  |  |  |  |  | 0.000 | 0.007 |
| OSUCoachMeyer |  |  |  |  |  |  | 0.000 | 0.007 |
| PointlessBlog |  |  |  |  |  |  | 0.000 | 0.007 |
| JohnBrennan |  |  |  |  |  |  | 0.000 | 0.007 |
| iddqd |  |  |  |  |  |  | 0.000 | 0.007 |
| bubzbeauty |  |  |  |  |  |  | 0.002 | 0.007 |
| backstreetboys |  |  |  |  |  |  | 0.000 | 0.007 |
| GOPTeens |  |  |  |  |  |  | 0.000 | 0.007 |
| IntThings |  |  |  |  |  |  | 0.000 | 0.007 |
| JohnKasich |  |  |  |  |  |  | 0.000 | 0.007 |
| JebBush |  |  |  |  |  |  | 0.000 | 0.007 |
| SoFabSweeps |  |  |  |  |  |  | 0.000 | 0.007 |
| LumionUSA |  |  |  |  |  |  | 0.000 | 0.007 |
| JapanCrate |  |  |  |  |  |  | 0.004 | 0.007 |
| TheCousinSal |  |  |  |  |  |  | 0.000 | 0.007 |
| PokemonSwordNS |  |  |  |  |  |  | 0.000 | 0.007 |
| TheHomeforIndie |  |  |  |  |  |  | 0.000 | 0.007 |
| DollarTree |  |  |  |  |  |  | 0.001 | 0.007 |
| socialmoms |  |  |  |  |  |  | 0.000 | 0.007 |
| ynscspds |  |  |  |  |  |  | 0.000 | 0.007 |
| redban |  |  |  |  |  |  | 0.000 | 0.007 |
| cgrand3 |  |  |  |  |  |  | 0.000 | 0.007 |
| MartinOMalley |  |  |  |  |  |  | 0.000 | 0.007 |
| ActionBronson |  |  |  |  |  |  | 0.000 | 0.007 |
| mrmoneymustache |  |  |  |  |  |  | 0.000 | 0.007 |
| qmee |  |  |  |  |  |  | 0.000 | 0.007 |
| AdamBaldwin |  |  |  |  |  |  | 0.000 | 0.007 |
| Edelman11 |  |  |  |  |  |  | 0.000 | 0.007 |
| reeses |  |  |  |  |  |  | 0.000 | 0.007 |
| 21savage |  |  |  |  |  |  | 0.000 | 0.007 |
| Pillsbury |  |  |  |  |  |  | 0.000 | 0.007 |
| Coffeemate |  |  |  |  |  |  | 0.000 | 0.007 |
| Pusheen |  |  |  |  |  |  | 0.000 | 0.007 |
| JohnKruk |  |  |  |  |  |  | 0.000 | 0.007 |
| JonahNRO |  |  |  |  |  |  | 0.000 | 0.007 |
| grahamelliot |  |  |  |  |  |  | 0.000 | 0.007 |
| jraitamaa |  |  |  |  |  |  | 0.000 | 0.007 |
| sepinwall |  |  |  |  |  |  | 0.003 | 0.007 |
| badbanana |  |  |  |  |  |  | 0.000 | 0.007 |
| Direct2Drive |  |  |  |  |  |  | 0.000 | 0.007 |
| mybomibox |  |  |  |  |  |  | 0.000 | 0.007 |
| uniguide |  |  |  |  |  |  | 0.000 | 0.007 |
| YourHealthyYear |  |  |  |  |  |  | 0.000 | 0.007 |
| celebrityhottub |  |  |  |  |  |  | 0.000 | 0.007 |
| Kekeflipnote |  |  |  |  |  |  | 0.000 | 0.007 |
| MLBDraft |  |  |  |  |  |  | 0.000 | 0.007 |
| iammrvandy |  |  |  |  |  |  | 0.000 | 0.007 |
| TheBillyWest |  |  |  |  |  |  | 0.001 | 0.007 |
| arielwinter1 |  |  |  |  |  |  | 0.000 | 0.007 |
| NerdistNews |  |  |  |  |  |  | 0.000 | 0.007 |
| AFP |  |  |  |  |  |  | 0.000 | 0.007 |
| PatriotsOfMars |  |  |  |  |  |  | 0.000 | 0.007 |
| LukeRomyn |  |  |  |  |  |  | 0.004 | 0.007 |
| MikeWhitaker |  |  |  |  |  |  | 0.002 | 0.007 |
| DanWetzel |  |  |  |  |  |  | 0.000 | 0.007 |
| katya_zamo |  |  |  |  |  |  | 0.000 | 0.007 |
| CAA_Official |  |  |  |  |  |  | 0.000 | 0.007 |
| BrainvoyagerMsc |  |  |  |  |  |  | 0.000 | 0.007 |
| pascalguyon |  |  |  |  |  |  | 0.000 | 0.007 |
| leenewtonsays |  |  |  |  |  |  | 0.000 | 0.007 |
| Nate_Cohn |  |  |  |  |  |  | 0.000 | 0.007 |
| laurenlapkus |  |  |  |  |  |  | 0.000 | 0.013 |
| NikkieTutorials |  |  |  |  |  |  | 0.000 | 0.013 |
| duncantrussell |  |  |  |  |  |  | 0.000 | 0.013 |
| tonyschwartz |  |  |  |  |  |  | 0.000 | 0.013 |
| PerdueChicken |  |  |  |  |  |  | 0.000 | 0.013 |
| DanielleMuscato |  |  |  |  |  |  | 0.000 | 0.013 |
| Immortals |  |  |  |  |  |  | 0.000 | 0.013 |
| htcesports |  |  |  |  |  |  | 0.000 | 0.013 |
| UltClassicRock |  |  |  |  |  |  | 0.001 | 0.013 |
| Voyboy |  |  |  |  |  |  | 0.000 | 0.013 |
| ChaoxLoL |  |  |  |  |  |  | 0.000 | 0.013 |
| MattBellamy |  |  |  |  |  |  | 0.000 | 0.013 |
| PublishersWkly |  |  |  |  |  |  | 0.000 | 0.013 |
| MomSpotted |  |  |  |  |  |  | 0.000 | 0.013 |
| MichaelKors |  |  |  |  |  |  | 0.000 | 0.013 |
| BenSimmons25 |  |  |  |  |  |  | 0.000 | 0.013 |
| NintendoVS |  |  |  |  |  |  | 0.000 | 0.013 |
| 538politics |  |  |  |  |  |  | 0.000 | 0.013 |
| jiatolentino |  |  |  |  |  |  | 0.000 | 0.013 |
| Foodimentary |  |  |  |  |  |  | 0.000 | 0.013 |
| TheMilesLuna |  |  |  |  |  |  | 0.000 | 0.013 |
| JonRisinger |  |  |  |  |  |  | 0.000 | 0.013 |
| MattHullum |  |  |  |  |  |  | 0.000 | 0.013 |
| mydealrocks |  |  |  |  |  |  | 0.001 | 0.013 |
| roguestormtv |  |  |  |  |  |  | 0.000 | 0.013 |
| Grover |  |  |  |  |  |  | 0.000 | 0.013 |
| goldengateblond |  |  |  |  |  |  | 0.000 | 0.013 |
| thunderf00t |  |  |  |  |  |  | 0.000 | 0.013 |
| theoduscrane |  |  |  |  |  |  | 0.006 | 0.013 |
| SharedDotCom |  |  |  |  |  |  | 0.000 | 0.013 |
| CHVRCHES |  |  |  |  |  |  | 0.000 | 0.013 |
| datsik |  |  |  |  |  |  | 0.000 | 0.013 |
| MLBPAClubhouse |  |  |  |  |  |  | 0.000 | 0.013 |
| mommykatandkids |  |  |  |  |  |  | 0.000 | 0.013 |
| BeckyWillis |  |  |  |  |  |  | 0.000 | 0.013 |
| flo_tweet |  |  |  |  |  |  | 0.000 | 0.013 |
| TheAndyKatz |  |  |  |  |  |  | 0.000 | 0.013 |
| ClareGrant |  |  |  |  |  |  | 0.000 | 0.013 |
| addthis |  |  |  |  |  |  | 0.000 | 0.013 |
| UWBadgers |  |  |  |  |  |  | 0.000 | 0.013 |
| GhostGaming |  |  |  |  |  |  | 0.000 | 0.013 |
| MariSmith |  |  |  |  |  |  | 0.000 | 0.013 |
| BettyBowers |  |  |  |  |  |  | 0.000 | 0.013 |
| Alaska5000 |  |  |  |  |  |  | 0.000 | 0.013 |
| LisaKudrow |  |  |  |  |  |  | 0.000 | 0.013 |
| NashFargo |  |  |  |  |  |  | 0.000 | 0.013 |
| DaybreakGames |  |  |  |  |  |  | 0.000 | 0.013 |
| StevenWilsonHQ |  |  |  |  |  |  | 0.000 | 0.013 |
| lawbreakers |  |  |  |  |  |  | 0.000 | 0.013 |
| garrynewman |  |  |  |  |  |  | 0.000 | 0.013 |
| UnrealEngine |  |  |  |  |  |  | 0.000 | 0.013 |
| YayaHan |  |  |  |  |  |  | 0.000 | 0.013 |
| DeathWishCoffee |  |  |  |  |  |  | 0.000 | 0.013 |
| Judgenap |  |  |  |  |  |  | 0.000 | 0.013 |
| FoxBusiness |  |  |  |  |  |  | 0.000 | 0.013 |
| id_2445739381 |  |  |  |  |  |  | 0.000 | 0.013 |
| HighlyRefined |  |  |  |  |  |  | 0.001 | 0.013 |
| GoldGloveTV |  |  |  |  |  |  | 0.000 | 0.013 |
| StatsBySTATS |  |  |  |  |  |  | 0.000 | 0.013 |
| frankiemuniz |  |  |  |  |  |  | 0.000 | 0.013 |
| ddockett |  |  |  |  |  |  | 0.000 | 0.013 |
| soylent |  |  |  |  |  |  | 0.000 | 0.013 |
| MGM_Studios |  |  |  |  |  |  | 0.000 | 0.013 |
| BAM__MARGERA |  |  |  |  |  |  | 0.000 | 0.013 |
| SodaStreamUSA |  |  |  |  |  |  | 0.000 | 0.013 |
| LandsEnd |  |  |  |  |  |  | 0.000 | 0.013 |
| ScottWesterfeld |  |  |  |  |  |  | 0.000 | 0.013 |
| 500Startups |  |  |  |  |  |  | 0.000 | 0.013 |
| EJDionne |  |  |  |  |  |  | 0.000 | 0.013 |
| dantebasco |  |  |  |  |  |  | 0.000 | 0.013 |
| MelissaRauch |  |  |  |  |  |  | 0.000 | 0.013 |
| EliStokols |  |  |  |  |  |  | 0.000 | 0.013 |
| emptywheel |  |  |  |  |  |  | 0.001 | 0.013 |
| Zisteau |  |  |  |  |  |  | 0.000 | 0.019 |
| thinkpiecebot |  |  |  |  |  |  | 0.000 | 0.019 |
| IHE_OFFICIAL |  |  |  |  |  |  | 0.000 | 0.019 |
| starbomb |  |  |  |  |  |  | 0.003 | 0.019 |
| RubberNinja |  |  |  |  |  |  | 0.000 | 0.019 |
| Dir_Devon_Avery |  |  |  |  |  |  | 0.000 | 0.019 |
| Razack66 |  |  |  |  |  |  | 0.000 | 0.019 |
| MelanieIglesias |  |  |  |  |  |  | 0.000 | 0.019 |
| nestbedding |  |  |  |  |  |  | 0.000 | 0.019 |
| bobducca |  |  |  |  |  |  | 0.000 | 0.019 |
| LifesABargain |  |  |  |  |  |  | 0.000 | 0.019 |
| ZoeSugg |  |  |  |  |  |  | 0.000 | 0.019 |
| A_Seagull |  |  |  |  |  |  | 0.000 | 0.019 |
| LiquidChillin |  |  |  |  |  |  | 0.000 | 0.019 |
| ryanyeetz |  |  |  |  |  |  | 0.000 | 0.019 |
| RollingStones |  |  |  |  |  |  | 0.000 | 0.019 |
| jimsciutto |  |  |  |  |  |  | 0.000 | 0.019 |
| HootsuiteMobile |  |  |  |  |  |  | 0.000 | 0.019 |
| NinjaTheory |  |  |  |  |  |  | 0.001 | 0.019 |
| GAMEdigital |  |  |  |  |  |  | 0.009 | 0.019 |
| PHIL_FISH |  |  |  |  |  |  | 0.000 | 0.019 |
| loltyler1 |  |  |  |  |  |  | 0.000 | 0.019 |
| ATT |  |  |  |  |  |  | 0.003 | 0.019 |
| MobieChick |  |  |  |  |  |  | 0.000 | 0.019 |
| JoeMande |  |  |  |  |  |  | 0.000 | 0.019 |
| id_1432138212 |  |  |  |  |  |  | 0.000 | 0.019 |
| cuzin_logic |  |  |  |  |  |  | 0.000 | 0.019 |
| alittleumbrella |  |  |  |  |  |  | 0.000 | 0.019 |
| TheReviewWire |  |  |  |  |  |  | 0.000 | 0.019 |
| HealthyWiserLLC |  |  |  |  |  |  | 0.000 | 0.019 |
| SocialSavvyGeek |  |  |  |  |  |  | 0.000 | 0.019 |
| springsteen |  |  |  |  |  |  | 0.000 | 0.019 |
| BrendanSchaub |  |  |  |  |  |  | 0.002 | 0.019 |
| 2K_UK |  |  |  |  |  |  | 0.000 | 0.019 |
| IronMaiden |  |  |  |  |  |  | 0.000 | 0.019 |
| MrsTad |  |  |  |  |  |  | 0.000 | 0.019 |
| RightThisMinute |  |  |  |  |  |  | 0.000 | 0.019 |
| nikesb |  |  |  |  |  |  | 0.000 | 0.019 |
| bjork |  |  |  |  |  |  | 0.000 | 0.019 |
| Pringles |  |  |  |  |  |  | 0.001 | 0.019 |
| TWCBreaking |  |  |  |  |  |  | 0.000 | 0.019 |
| TheGingerarchy |  |  |  |  |  |  | 0.000 | 0.019 |
| geoffjohns |  |  |  |  |  |  | 0.005 | 0.019 |
| PestDefense |  |  |  |  |  |  | 0.000 | 0.019 |
| ColdFusion_TV |  |  |  |  |  |  | 0.000 | 0.019 |
| TMNT |  |  |  |  |  |  | 0.000 | 0.019 |
| blackcircles |  |  |  |  |  |  | 0.000 | 0.019 |
| PugetSystems |  |  |  |  |  |  | 0.000 | 0.019 |
| DaveDTC |  |  |  |  |  |  | 0.000 | 0.019 |
| minutephysics |  |  |  |  |  |  | 0.000 | 0.019 |
| XboxEntertain |  |  |  |  |  |  | 0.000 | 0.019 |
| theharryshearer |  |  |  |  |  |  | 0.002 | 0.019 |
| HotNewHipHop |  |  |  |  |  |  | 0.000 | 0.019 |
| HipHopDX |  |  |  |  |  |  | 0.000 | 0.019 |
| Champ_Payne |  |  |  |  |  |  | 0.000 | 0.019 |
| Karabo_Mokgoko |  |  |  |  |  |  | 0.000 | 0.019 |
| nbc |  |  |  |  |  |  | 0.000 | 0.019 |
| WheelofFortune |  |  |  |  |  |  | 0.000 | 0.019 |
| BabyCenter |  |  |  |  |  |  | 0.000 | 0.019 |
| NoiseyMusic |  |  |  |  |  |  | 0.000 | 0.019 |
| DaleJr |  |  |  |  |  |  | 0.000 | 0.019 |
| NdamukongSuh |  |  |  |  |  |  | 0.000 | 0.019 |
| takeaDailybreak |  |  |  |  |  |  | 0.000 | 0.019 |
| AldiUSA |  |  |  |  |  |  | 0.000 | 0.019 |
| Nickelodeon |  |  |  |  |  |  | 0.000 | 0.019 |
| amazonfiretv |  |  |  |  |  |  | 0.000 | 0.019 |
| VitaminShoppe |  |  |  |  |  |  | 0.000 | 0.019 |
| CouponAnna |  |  |  |  |  |  | 0.000 | 0.025 |
| RepCummings |  |  |  |  |  |  | 0.000 | 0.025 |
| airfarewatchdog |  |  |  |  |  |  | 0.000 | 0.025 |
| KazHiraiCEO |  |  |  |  |  |  | 0.000 | 0.025 |
| ShawkatAlia |  |  |  |  |  |  | 0.000 | 0.025 |
| _BrianaDejesus |  |  |  |  |  |  | 0.000 | 0.025 |
| Javimarroquin9 |  |  |  |  |  |  | 0.000 | 0.025 |
| AmberLPortwood |  |  |  |  |  |  | 0.001 | 0.025 |
| ColourPopCo |  |  |  |  |  |  | 0.000 | 0.025 |
| FreebieJulie |  |  |  |  |  |  | 0.000 | 0.025 |
| Tempo_S2J |  |  |  |  |  |  | 0.000 | 0.025 |
| skydart |  |  |  |  |  |  | 0.000 | 0.025 |
| LibyaLiberty |  |  |  |  |  |  | 0.000 | 0.025 |
| JadAbumrad |  |  |  |  |  |  | 0.000 | 0.025 |
| CarmenSandiego |  |  |  |  |  |  | 0.000 | 0.025 |
| FriedgeHNIC |  |  |  |  |  |  | 0.002 | 0.025 |
| PierreVLeBrun |  |  |  |  |  |  | 0.004 | 0.025 |
| yoifeellike |  |  |  |  |  |  | 0.000 | 0.025 |
| LearningHandsOn |  |  |  |  |  |  | 0.000 | 0.025 |
| MonteCristo |  |  |  |  |  |  | 0.000 | 0.025 |
| ArmsControlWonk |  |  |  |  |  |  | 0.000 | 0.025 |
| doctorow |  |  |  |  |  |  | 0.000 | 0.025 |
| anildash |  |  |  |  |  |  | 0.002 | 0.025 |
| leanettef |  |  |  |  |  |  | 0.000 | 0.025 |
| awonderland |  |  |  |  |  |  | 0.000 | 0.025 |
| WhatSoNot |  |  |  |  |  |  | 0.000 | 0.025 |
| TaranKillam |  |  |  |  |  |  | 0.000 | 0.025 |
| MommysBlckParty |  |  |  |  |  |  | 0.000 | 0.025 |
| Jamericanspice |  |  |  |  |  |  | 0.000 | 0.025 |
| MarinoBambinos |  |  |  |  |  |  | 0.000 | 0.025 |
| CanvasPop |  |  |  |  |  |  | 0.000 | 0.025 |
| amandlastenberg |  |  |  |  |  |  | 0.000 | 0.025 |
| torrentfreak |  |  |  |  |  |  | 0.000 | 0.025 |
| mPinoe |  |  |  |  |  |  | 0.000 | 0.025 |
| WhitePplQuote |  |  |  |  |  |  | 0.000 | 0.025 |
| adamgoldmanNYT |  |  |  |  |  |  | 0.000 | 0.025 |
| beck |  |  |  |  |  |  | 0.000 | 0.025 |
| JackAllTimeLow |  |  |  |  |  |  | 0.000 | 0.025 |
| OldSchoolRS |  |  |  |  |  |  | 0.000 | 0.025 |
| talkandroidnews |  |  |  |  |  |  | 0.000 | 0.025 |
| arden_cho |  |  |  |  |  |  | 0.003 | 0.025 |
| amazingatheist |  |  |  |  |  |  | 0.000 | 0.025 |
| waynecoyne |  |  |  |  |  |  | 0.003 | 0.025 |
| theflaminglips |  |  |  |  |  |  | 0.000 | 0.025 |
| reddit_million |  |  |  |  |  |  | 0.000 | 0.025 |
| GirlCode |  |  |  |  |  |  | 0.000 | 0.025 |
| trixiemattel |  |  |  |  |  |  | 0.000 | 0.025 |
| womenshumor |  |  |  |  |  |  | 0.000 | 0.025 |
| moneyartist |  |  |  |  |  |  | 0.003 | 0.025 |
| ttpm |  |  |  |  |  |  | 0.000 | 0.025 |
| mirandalambert |  |  |  |  |  |  | 0.000 | 0.025 |
| iamthemaven |  |  |  |  |  |  | 0.000 | 0.025 |
| tomshardware |  |  |  |  |  |  | 0.000 | 0.025 |
| Polytron |  |  |  |  |  |  | 0.001 | 0.025 |
| WayneBrady |  |  |  |  |  |  | 0.000 | 0.025 |
| wagsk13wjs_e |  |  |  |  |  |  | 0.000 | 0.025 |
| DocGooden16 |  |  |  |  |  |  | 0.000 | 0.025 |
| googlevoice |  |  |  |  |  |  | 0.000 | 0.025 |
| TonyDungy |  |  |  |  |  |  | 0.000 | 0.025 |
| HistoryToLearn |  |  |  |  |  |  | 0.000 | 0.025 |
| Happy1 |  |  |  |  |  |  | 0.000 | 0.025 |
| G2SmithZz |  |  |  |  |  |  | 0.017 | 0.025 |
| kiocsgoo |  |  |  |  |  |  | 0.000 | 0.025 |
| Teleflora |  |  |  |  |  |  | 0.000 | 0.025 |
| AvosfromMexico |  |  |  |  |  |  | 0.000 | 0.025 |
| id_386788466 |  |  |  |  |  |  | 0.000 | 0.025 |
| tysonchandler |  |  |  |  |  |  | 0.000 | 0.025 |
| southernkrazed |  |  |  |  |  |  | 0.000 | 0.025 |
| 1stopmom |  |  |  |  |  |  | 0.000 | 0.025 |
| TimMiller2011 |  |  |  |  |  |  | 0.000 | 0.025 |
| id_30841587 |  |  |  |  |  |  | 0.000 | 0.025 |
| marshmellomusic |  |  |  |  |  |  | 0.000 | 0.025 |
| BruceFeldmanCFB |  |  |  |  |  |  | 0.006 | 0.025 |
| iamkevingates |  |  |  |  |  |  | 0.000 | 0.025 |
| SonyElectronics |  |  |  |  |  |  | 0.000 | 0.025 |
| freebiespot |  |  |  |  |  |  | 0.000 | 0.025 |
| ErnestLe |  |  |  |  |  |  | 0.000 | 0.025 |
| AADaddario |  |  |  |  |  |  | 0.000 | 0.025 |
| itsJulieBowen |  |  |  |  |  |  | 0.002 | 0.025 |
| serafinowicz |  |  |  |  |  |  | 0.000 | 0.025 |
| EAAccess |  |  |  |  |  |  | 0.002 | 0.025 |
| flyinglotus |  |  |  |  |  |  | 0.000 | 0.025 |
| IamTrevorMay |  |  |  |  |  |  | 0.000 | 0.025 |
| TheTylt |  |  |  |  |  |  | 0.000 | 0.025 |
| tribelaw |  |  |  |  |  |  | 0.000 | 0.025 |
| Richard_Schiff |  |  |  |  |  |  | 0.000 | 0.025 |
| TomDaley1994 |  |  |  |  |  |  | 0.000 | 0.025 |
| maddieziegler |  |  |  |  |  |  | 0.000 | 0.025 |
| TBlackford3 |  |  |  |  |  |  | 0.000 | 0.025 |
| tinybuddha |  |  |  |  |  |  | 0.000 | 0.031 |
| State_Champs |  |  |  |  |  |  | 0.000 | 0.031 |
| JoyceDuboise |  |  |  |  |  |  | 0.000 | 0.031 |
| SenseofCents |  |  |  |  |  |  | 0.000 | 0.031 |
| SonequaMG |  |  |  |  |  |  | 0.000 | 0.031 |
| id_965015705123930114 |  |  |  |  |  |  | 0.007 | 0.031 |
| jeffltaylor2 |  |  |  |  |  |  | 0.000 | 0.031 |
| Tritonal |  |  |  |  |  |  | 0.000 | 0.031 |
| BreeNewsome |  |  |  |  |  |  | 0.000 | 0.031 |
| jondaly |  |  |  |  |  |  | 0.000 | 0.031 |
| Carrie_Rachel |  |  |  |  |  |  | 0.000 | 0.031 |
| FFDP |  |  |  |  |  |  | 0.000 | 0.031 |
| JesseCox |  |  |  |  |  |  | 0.000 | 0.031 |
| alicecooper |  |  |  |  |  |  | 0.000 | 0.031 |
| JonathanRKnight |  |  |  |  |  |  | 0.000 | 0.031 |
| kandeejohnson |  |  |  |  |  |  | 0.000 | 0.031 |
| SumerianRecords |  |  |  |  |  |  | 0.000 | 0.031 |
| JakePeriphery |  |  |  |  |  |  | 0.000 | 0.031 |
| mishaperiphery |  |  |  |  |  |  | 0.000 | 0.031 |
| FRONZ1LLA |  |  |  |  |  |  | 0.000 | 0.031 |
| iseestarsmusic |  |  |  |  |  |  | 0.009 | 0.031 |
| SPENCESOTELO |  |  |  |  |  |  | 0.000 | 0.031 |
| dannyworsnop |  |  |  |  |  |  | 0.000 | 0.031 |
| NikkiSixx |  |  |  |  |  |  | 0.000 | 0.031 |
| Matt_LeBlanc |  |  |  |  |  |  | 0.000 | 0.031 |
| id_2445577673 |  |  |  |  |  |  | 0.000 | 0.031 |
| abbieheppe |  |  |  |  |  |  | 0.000 | 0.031 |
| Reince |  |  |  |  |  |  | 0.000 | 0.031 |
| CSGOEmpire |  |  |  |  |  |  | 0.000 | 0.031 |
| twittels |  |  |  |  |  |  | 0.000 | 0.031 |
| RoyHalladay |  |  |  |  |  |  | 0.000 | 0.031 |
| ayeshacurry |  |  |  |  |  |  | 0.000 | 0.031 |
| id_566677237 |  |  |  |  |  |  | 0.000 | 0.031 |
| newscientist |  |  |  |  |  |  | 0.000 | 0.031 |
| TwitterLive |  |  |  |  |  |  | 0.000 | 0.031 |
| Scholastic |  |  |  |  |  |  | 0.000 | 0.031 |
| GrantlandLive |  |  |  |  |  |  | 0.000 | 0.031 |
| EllohimeTwitch |  |  |  |  |  |  | 0.000 | 0.031 |
| stayingyoung2 |  |  |  |  |  |  | 0.000 | 0.031 |
| dc_mma |  |  |  |  |  |  | 0.000 | 0.031 |
| Dove |  |  |  |  |  |  | 0.000 | 0.031 |
| dellhome |  |  |  |  |  |  | 0.000 | 0.031 |
| childrensplace |  |  |  |  |  |  | 0.003 | 0.031 |
| UzoAduba |  |  |  |  |  |  | 0.000 | 0.031 |
| scharpling |  |  |  |  |  |  | 0.000 | 0.031 |
| C4ETech |  |  |  |  |  |  | 0.000 | 0.031 |
| kevinmitnick |  |  |  |  |  |  | 0.003 | 0.031 |
| StatikSelekt |  |  |  |  |  |  | 0.001 | 0.031 |
| KREAYSHAWN |  |  |  |  |  |  | 0.002 | 0.031 |
| CurrenSy_Spitta |  |  |  |  |  |  | 0.000 | 0.031 |
| ZotacCup |  |  |  |  |  |  | 0.000 | 0.031 |
| DuckDuckGo |  |  |  |  |  |  | 0.000 | 0.031 |
| SarcasticRover |  |  |  |  |  |  | 0.000 | 0.031 |
| HARDWELL |  |  |  |  |  |  | 0.000 | 0.031 |
| MLBTheShow |  |  |  |  |  |  | 0.000 | 0.031 |
| Hersheys |  |  |  |  |  |  | 0.000 | 0.031 |
| TempleRun |  |  |  |  |  |  | 0.000 | 0.031 |
| Abovo42 |  |  |  |  |  |  | 0.000 | 0.031 |
| TJLang70 |  |  |  |  |  |  | 0.001 | 0.031 |
| TommyLasorda |  |  |  |  |  |  | 0.000 | 0.031 |
| DiGiorno |  |  |  |  |  |  | 0.000 | 0.031 |
| NotTinaFey |  |  |  |  |  |  | 0.000 | 0.031 |
| OversightDems |  |  |  |  |  |  | 0.000 | 0.031 |
| testedcom |  |  |  |  |  |  | 0.000 | 0.031 |
| LittleTikes |  |  |  |  |  |  | 0.000 | 0.031 |
| JesseMcCartney |  |  |  |  |  |  | 0.001 | 0.031 |
| TWLOHA |  |  |  |  |  |  | 0.004 | 0.031 |
| WhitfordBradley |  |  |  |  |  |  | 0.000 | 0.031 |
| sassypiehole |  |  |  |  |  |  | 0.000 | 0.031 |
| AriMelber |  |  |  |  |  |  | 0.000 | 0.031 |
| corbinbleu |  |  |  |  |  |  | 0.000 | 0.031 |
| MarlonWayans |  |  |  |  |  |  | 0.000 | 0.031 |
| tanga |  |  |  |  |  |  | 0.000 | 0.031 |
| SELFmagazine |  |  |  |  |  |  | 0.000 | 0.031 |
| winniesun |  |  |  |  |  |  | 0.000 | 0.031 |
| juliannehough |  |  |  |  |  |  | 0.000 | 0.031 |
| MsMissy62 |  |  |  |  |  |  | 0.000 | 0.031 |
| sydneemcelroy |  |  |  |  |  |  | 0.000 | 0.031 |
| pleatedjeans |  |  |  |  |  |  | 0.000 | 0.031 |
| soccerdotcom |  |  |  |  |  |  | 0.000 | 0.031 |
| id_15279452 |  |  |  |  |  |  | 0.001 | 0.031 |
| whatcd |  |  |  |  |  |  | 0.004 | 0.031 |
| shiralazar |  |  |  |  |  |  | 0.000 | 0.031 |
| frankcifaldi |  |  |  |  |  |  | 0.000 | 0.031 |
| haydenpanettier |  |  |  |  |  |  | 0.000 | 0.031 |
| eBayDeals |  |  |  |  |  |  | 0.000 | 0.031 |
| WalmartToday |  |  |  |  |  |  | 0.000 | 0.031 |
| AVTVClub |  |  |  |  |  |  | 0.000 | 0.031 |
| Calum5SOS |  |  |  |  |  |  | 0.002 | 0.031 |
| NoahMunck |  |  |  |  |  |  | 0.000 | 0.031 |
| Colts |  |  |  |  |  |  | 0.000 | 0.036 |
| mrsfields |  |  |  |  |  |  | 0.000 | 0.036 |
| edible |  |  |  |  |  |  | 0.000 | 0.036 |
| CokePokes |  |  |  |  |  |  | 0.000 | 0.036 |
| TweakUpdates |  |  |  |  |  |  | 0.000 | 0.036 |
| id_736250348466229253 |  |  |  |  |  |  | 0.000 | 0.036 |
| SlackHQ |  |  |  |  |  |  | 0.001 | 0.036 |
| iamKingLos |  |  |  |  |  |  | 0.000 | 0.036 |
| AP_Politics |  |  |  |  |  |  | 0.002 | 0.036 |
| YahooCare |  |  |  |  |  |  | 0.000 | 0.036 |
| SpaceshipsLB |  |  |  |  |  |  | 0.000 | 0.036 |
| Felissahadas |  |  |  |  |  |  | 0.000 | 0.036 |
| JustMarriedMom3 |  |  |  |  |  |  | 0.000 | 0.036 |
| NaturesSleep |  |  |  |  |  |  | 0.000 | 0.036 |
| thislilpiglet |  |  |  |  |  |  | 0.000 | 0.036 |
| davidwain |  |  |  |  |  |  | 0.000 | 0.036 |
| Ginger_High |  |  |  |  |  |  | 0.000 | 0.036 |
| MikiHope |  |  |  |  |  |  | 0.000 | 0.036 |
| Elleberra |  |  |  |  |  |  | 0.000 | 0.036 |
| MumbleBeeInc |  |  |  |  |  |  | 0.000 | 0.036 |
| Lions |  |  |  |  |  |  | 0.000 | 0.036 |
| TrumpSC |  |  |  |  |  |  | 0.000 | 0.036 |
| PigsAndPlans |  |  |  |  |  |  | 0.000 | 0.036 |
| peta |  |  |  |  |  |  | 0.000 | 0.036 |
| momfindsout |  |  |  |  |  |  | 0.000 | 0.036 |
| RoseMarie4Real |  |  |  |  |  |  | 0.007 | 0.036 |
| QueenWillRock |  |  |  |  |  |  | 0.000 | 0.036 |
| beastieboys |  |  |  |  |  |  | 0.000 | 0.036 |
| blicqer |  |  |  |  |  |  | 0.000 | 0.036 |
| id_797869498757955589 |  |  |  |  |  |  | 0.000 | 0.036 |
| illwah |  |  |  |  |  |  | 0.000 | 0.036 |
| Slayer |  |  |  |  |  |  | 0.000 | 0.036 |
| SeetherOfficial |  |  |  |  |  |  | 0.000 | 0.036 |
| CyberpunkGame |  |  |  |  |  |  | 0.000 | 0.036 |
| satyanadella |  |  |  |  |  |  | 0.005 | 0.036 |
| rockpapershot |  |  |  |  |  |  | 0.000 | 0.036 |
| IGBundles |  |  |  |  |  |  | 0.000 | 0.036 |
| pickupIines |  |  |  |  |  |  | 0.000 | 0.036 |
| Jaboowins |  |  |  |  |  |  | 0.000 | 0.036 |
| JheneAiko |  |  |  |  |  |  | 0.000 | 0.036 |
| dumbassgenius |  |  |  |  |  |  | 0.000 | 0.036 |
| CecilBaldwinIII |  |  |  |  |  |  | 0.000 | 0.036 |
| DaveWeasel |  |  |  |  |  |  | 0.000 | 0.036 |
| id_284441324 |  |  |  |  |  |  | 0.000 | 0.036 |
| whoisMGMT |  |  |  |  |  |  | 0.000 | 0.036 |
| MyKiddiesCorner |  |  |  |  |  |  | 0.000 | 0.036 |
| 247moms |  |  |  |  |  |  | 0.000 | 0.036 |
| Overstock |  |  |  |  |  |  | 0.000 | 0.036 |
| tmbg |  |  |  |  |  |  | 0.000 | 0.036 |
| DarrellIssa |  |  |  |  |  |  | 0.000 | 0.036 |
| sarahlane |  |  |  |  |  |  | 0.000 | 0.036 |
| HaggarCo |  |  |  |  |  |  | 0.001 | 0.036 |
| oddfuckingtaco |  |  |  |  |  |  | 0.000 | 0.036 |
| gofundme |  |  |  |  |  |  | 0.000 | 0.036 |
| EmmaBunton |  |  |  |  |  |  | 0.000 | 0.036 |
| ParisJackson |  |  |  |  |  |  | 0.000 | 0.036 |
| ChloeKim |  |  |  |  |  |  | 0.000 | 0.036 |
| danpfeiffer |  |  |  |  |  |  | 0.000 | 0.036 |
| KChenoweth |  |  |  |  |  |  | 0.000 | 0.036 |
| RachelLCoppola |  |  |  |  |  |  | 0.000 | 0.036 |
| LoganLerman |  |  |  |  |  |  | 0.000 | 0.036 |
| NETGEAR |  |  |  |  |  |  | 0.009 | 0.036 |
| id_2612261960 |  |  |  |  |  |  | 0.000 | 0.042 |
| scalzi |  |  |  |  |  |  | 0.000 | 0.042 |
| AcevogWomen |  |  |  |  |  |  | 0.000 | 0.042 |
| samasam |  |  |  |  |  |  | 0.000 | 0.042 |
| MimiBakerMN |  |  |  |  |  |  | 0.000 | 0.042 |
| trintran |  |  |  |  |  |  | 0.000 | 0.042 |
| Jensen |  |  |  |  |  |  | 0.000 | 0.042 |
| RivingtonThe3rd |  |  |  |  |  |  | 0.000 | 0.042 |
| DarshanU |  |  |  |  |  |  | 0.000 | 0.042 |
| LemonNation |  |  |  |  |  |  | 0.000 | 0.042 |
| Sneaky |  |  |  |  |  |  | 0.000 | 0.042 |
| FlyBalls |  |  |  |  |  |  | 0.000 | 0.042 |
| womensmarch |  |  |  |  |  |  | 0.000 | 0.042 |
| DucksauceInc |  |  |  |  |  |  | 0.000 | 0.042 |
| trendymomreview |  |  |  |  |  |  | 0.000 | 0.042 |
| CristineStruble |  |  |  |  |  |  | 0.000 | 0.042 |
| KlayThompson |  |  |  |  |  |  | 0.000 | 0.042 |
| zerowondering |  |  |  |  |  |  | 0.000 | 0.042 |
| jccaylen |  |  |  |  |  |  | 0.019 | 0.042 |
| garnierUSA |  |  |  |  |  |  | 0.000 | 0.042 |
| samirawiley |  |  |  |  |  |  | 0.000 | 0.042 |
| KermitTheFrog |  |  |  |  |  |  | 0.000 | 0.042 |
| iAmFroggyFresh |  |  |  |  |  |  | 0.000 | 0.042 |
| kirstin |  |  |  |  |  |  | 0.000 | 0.042 |
| IngrahamAngle |  |  |  |  |  |  | 0.003 | 0.042 |
| RyanLochte |  |  |  |  |  |  | 0.000 | 0.042 |
| Crowdfire |  |  |  |  |  |  | 0.002 | 0.042 |
| whedonesque |  |  |  |  |  |  | 0.000 | 0.042 |
| LFC |  |  |  |  |  |  | 0.009 | 0.042 |
| fewnation |  |  |  |  |  |  | 0.000 | 0.042 |
| sweetpeasavings |  |  |  |  |  |  | 0.000 | 0.042 |
| RobZombie |  |  |  |  |  |  | 0.000 | 0.042 |
| codyko |  |  |  |  |  |  | 0.000 | 0.042 |
| ParentingPatch |  |  |  |  |  |  | 0.000 | 0.042 |
| mommieswithcent |  |  |  |  |  |  | 0.000 | 0.042 |
| BillBailey |  |  |  |  |  |  | 0.000 | 0.042 |
| sixers |  |  |  |  |  |  | 0.000 | 0.042 |
| DrStrange |  |  |  |  |  |  | 0.003 | 0.042 |
| JohnLithgow |  |  |  |  |  |  | 0.000 | 0.042 |
| DanRyckert |  |  |  |  |  |  | 0.000 | 0.042 |
| ManMadeMoon |  |  |  |  |  |  | 0.000 | 0.042 |
| shortyawards |  |  |  |  |  |  | 0.002 | 0.042 |
| Chip_Chick |  |  |  |  |  |  | 0.000 | 0.042 |
| Zak_Bagans |  |  |  |  |  |  | 0.000 | 0.042 |
| BiglyPrez |  |  |  |  |  |  | 0.000 | 0.042 |
| wescraven |  |  |  |  |  |  | 0.000 | 0.042 |
| wellbelove |  |  |  |  |  |  | 0.002 | 0.042 |
| claytandrew |  |  |  |  |  |  | 0.000 | 0.042 |
| GamePro |  |  |  |  |  |  | 0.000 | 0.042 |
| wreckitralph |  |  |  |  |  |  | 0.000 | 0.042 |
| ourkidsmom |  |  |  |  |  |  | 0.000 | 0.042 |
| MidgetMomma1200 |  |  |  |  |  |  | 0.000 | 0.042 |
| ByEmilyStephens |  |  |  |  |  |  | 0.000 | 0.042 |
| CleverHousewife |  |  |  |  |  |  | 0.000 | 0.042 |
| WiCProject |  |  |  |  |  |  | 0.000 | 0.042 |
| infusedreviews |  |  |  |  |  |  | 0.000 | 0.042 |
| lohanthony |  |  |  |  |  |  | 0.000 | 0.042 |
| ModernFam |  |  |  |  |  |  | 0.000 | 0.042 |
| ZodiacFacts |  |  |  |  |  |  | 0.000 | 0.042 |
| lenatheplug |  |  |  |  |  |  | 0.002 | 0.042 |
| joshuatopolsky |  |  |  |  |  |  | 0.000 | 0.042 |
| semphisss |  |  |  |  |  |  | 0.000 | 0.042 |
| TPM |  |  |  |  |  |  | 0.000 | 0.042 |
| indelight |  |  |  |  |  |  | 0.000 | 0.042 |
| brendonurie |  |  |  |  |  |  | 0.000 | 0.042 |
| MomsMeet |  |  |  |  |  |  | 0.000 | 0.042 |
| MarkSalling |  |  |  |  |  |  | 0.000 | 0.042 |
| FitspirationaI |  |  |  |  |  |  | 0.000 | 0.042 |
| tothekidswho |  |  |  |  |  |  | 0.000 | 0.042 |
| okgo |  |  |  |  |  |  | 0.000 | 0.042 |
| KINGDOMHEARTS |  |  |  |  |  |  | 0.000 | 0.042 |
| KodakBlack1k |  |  |  |  |  |  | 0.000 | 0.042 |
| idoser |  |  |  |  |  |  | 0.000 | 0.042 |
| TheItMom |  |  |  |  |  |  | 0.000 | 0.042 |
| Gklippingkrazy |  |  |  |  |  |  | 0.000 | 0.042 |
| FocusPointeGLB |  |  |  |  |  |  | 0.000 | 0.042 |
| digg |  |  |  |  |  |  | 0.004 | 0.048 |
| SuperMCGamer |  |  |  |  |  |  | 0.000 | 0.048 |
| LYNNGVNN |  |  |  |  |  |  | 0.009 | 0.048 |
| ThisIsPVRIS |  |  |  |  |  |  | 0.001 | 0.048 |
| NYCMayor |  |  |  |  |  |  | 0.000 | 0.048 |
| MrChuckD |  |  |  |  |  |  | 0.000 | 0.048 |
| AndreaRussett |  |  |  |  |  |  | 0.000 | 0.048 |
| nocontextpawnee |  |  |  |  |  |  | 0.000 | 0.048 |
| CaprisCoupons |  |  |  |  |  |  | 0.000 | 0.048 |
| anomalyxd |  |  |  |  |  |  | 0.000 | 0.048 |
| CuriousZelda |  |  |  |  |  |  | 0.000 | 0.048 |
| absurdistwords |  |  |  |  |  |  | 0.000 | 0.048 |
| holly |  |  |  |  |  |  | 0.001 | 0.048 |
| shondarhimes |  |  |  |  |  |  | 0.000 | 0.048 |
| IMBrettDalton |  |  |  |  |  |  | 0.000 | 0.048 |
| GOBankingRates |  |  |  |  |  |  | 0.000 | 0.048 |
| id_752581890716999680 |  |  |  |  |  |  | 0.000 | 0.048 |
| RareCat |  |  |  |  |  |  | 0.005 | 0.048 |
| LMC502 |  |  |  |  |  |  | 0.000 | 0.048 |
| CentralBargains |  |  |  |  |  |  | 0.001 | 0.048 |
| MamasMission |  |  |  |  |  |  | 0.001 | 0.048 |
| giveawaymonkey |  |  |  |  |  |  | 0.000 | 0.048 |
| MomVacationSpot |  |  |  |  |  |  | 0.000 | 0.048 |
| TheWordens |  |  |  |  |  |  | 0.000 | 0.048 |
| topnotchblog |  |  |  |  |  |  | 0.004 | 0.048 |
| Monica61 |  |  |  |  |  |  | 0.000 | 0.048 |
| PeaOfSweetness |  |  |  |  |  |  | 0.001 | 0.048 |
| LiteraryWinner |  |  |  |  |  |  | 0.000 | 0.048 |
| authorldeluca |  |  |  |  |  |  | 0.000 | 0.048 |
| theECOlifestyle |  |  |  |  |  |  | 0.001 | 0.048 |
| ThisWayandThat |  |  |  |  |  |  | 0.000 | 0.048 |
| LifeWithKathy |  |  |  |  |  |  | 0.000 | 0.048 |
| cipbtro |  |  |  |  |  |  | 0.000 | 0.048 |
| DanelleJohns |  |  |  |  |  |  | 0.001 | 0.048 |
| BudgetEarth |  |  |  |  |  |  | 0.000 | 0.048 |
| Choosingtolive |  |  |  |  |  |  | 0.000 | 0.048 |
| ThisIsCori |  |  |  |  |  |  | 0.000 | 0.048 |
| WheelnDealMama |  |  |  |  |  |  | 0.000 | 0.048 |
| inkscrblr |  |  |  |  |  |  | 0.000 | 0.048 |
| perfimperfct |  |  |  |  |  |  | 0.000 | 0.048 |
| MyPhotopage |  |  |  |  |  |  | 0.000 | 0.048 |
| yeewittlethings |  |  |  |  |  |  | 0.000 | 0.048 |
| realChadJohnson |  |  |  |  |  |  | 0.000 | 0.048 |
| research_city |  |  |  |  |  |  | 0.000 | 0.048 |
| metalsucks |  |  |  |  |  |  | 0.000 | 0.048 |
| chuggaaconroy |  |  |  |  |  |  | 0.005 | 0.048 |
| ChampionsLeague |  |  |  |  |  |  | 0.000 | 0.048 |
| drewtoothpaste |  |  |  |  |  |  | 0.005 | 0.048 |
| screencrushnews |  |  |  |  |  |  | 0.000 | 0.048 |
| crissles |  |  |  |  |  |  | 0.000 | 0.048 |
| atmosphere |  |  |  |  |  |  | 0.000 | 0.048 |
| SoVeryAwkward |  |  |  |  |  |  | 0.000 | 0.048 |
| RealRonnieMagro |  |  |  |  |  |  | 0.000 | 0.048 |
| SammiSweetheart |  |  |  |  |  |  | 0.000 | 0.048 |
| wwd |  |  |  |  |  |  | 0.000 | 0.048 |
| nodoubt |  |  |  |  |  |  | 0.000 | 0.048 |
| kobunheat |  |  |  |  |  |  | 0.000 | 0.048 |
| duffgoldman |  |  |  |  |  |  | 0.000 | 0.048 |
| WritersDigest |  |  |  |  |  |  | 0.000 | 0.048 |
| AdoreDelano |  |  |  |  |  |  | 0.000 | 0.048 |
| GiGiHadid |  |  |  |  |  |  | 0.000 | 0.048 |
| DATBLACKMOMBA13 |  |  |  |  |  |  | 0.000 | 0.048 |
| OMGhada |  |  |  |  |  |  | 0.000 | 0.048 |
| thxmailcarrier |  |  |  |  |  |  | 0.000 | 0.048 |
| StacieinAtlanta |  |  |  |  |  |  | 0.002 | 0.048 |
| mommityblog |  |  |  |  |  |  | 0.000 | 0.048 |
| hughhefner |  |  |  |  |  |  | 0.000 | 0.048 |
| DropsByJay |  |  |  |  |  |  | 0.000 | 0.048 |
| autimaticTV |  |  |  |  |  |  | 0.000 | 0.048 |
| Xizt |  |  |  |  |  |  | 0.000 | 0.048 |
| ScreaM_ |  |  |  |  |  |  | 0.000 | 0.048 |
| AcerAmerica |  |  |  |  |  |  | 0.000 | 0.048 |
| sequoia |  |  |  |  |  |  | 0.000 | 0.048 |
| VentureBeat |  |  |  |  |  |  | 0.000 | 0.048 |
| AppzThatRock |  |  |  |  |  |  | 0.000 | 0.048 |
| TheGeekFuel |  |  |  |  |  |  | 0.000 | 0.048 |
| OATreasure |  |  |  |  |  |  | 0.000 | 0.048 |
| Bluvos_HQ |  |  |  |  |  |  | 0.001 | 0.048 |
| jerrytrainor |  |  |  |  |  |  | 0.000 | 0.048 |
| RT_com |  |  |  |  |  |  | 0.000 | 0.048 |
| juliussharpe |  |  |  |  |  |  | 0.000 | 0.048 |
| Radioblogger |  |  |  |  |  |  | 0.000 | 0.048 |
| rhysiedarby |  |  |  |  |  |  | 0.000 | 0.048 |
| TeaPainUSA |  |  |  |  |  |  | 0.002 | 0.048 |
| fwong |  |  |  |  |  |  | 0.000 | 0.048 |
| id_598919816 |  |  |  |  |  |  | 0.000 | 0.048 |
| AltStateDpt |  |  |  |  |  |  | 0.000 | 0.048 |
| BarbraStreisand |  |  |  |  |  |  | 0.000 | 0.048 |
| georgemoen |  |  |  |  |  |  | 0.000 | 0.048 |
| CREWcrew |  |  |  |  |  |  | 0.000 | 0.048 |
| StephenCaggiano |  |  |  |  |  |  | 0.000 | 0.048 |
| UniversalPics |  |  |  |  |  |  | 0.000 | 0.048 |
| CBS |  |  |  |  |  |  | 0.000 | 0.048 |
| Veronica |  |  |  |  |  |  | 0.000 | 0.048 |
| travismcelroy |  |  |  |  |  |  | 0.000 | 0.048 |
| Pogue |  |  |  |  |  |  | 0.000 | 0.048 |
| CutonDime25 |  |  |  |  |  |  | 0.005 | 0.048 |
| DavidHenrie |  |  |  |  |  |  | 0.000 | 0.048 |
| EmilyOsment |  |  |  |  |  |  | 0.000 | 0.048 |
| SunChips |  |  |  |  |  |  | 0.000 | 0.048 |
| alexa_chung |  |  |  |  |  |  | 0.000 | 0.048 |
| THEREALSWIZZZ |  |  |  |  |  |  | 0.000 | 0.048 |
| xavierkatana |  |  |  |  |  |  | 0.000 | 0.048 |
| WorkMoneyFun |  |  |  |  |  |  | 0.003 | 0.054 |
| XFX_PlayHard |  |  |  |  |  |  | 0.000 | 0.054 |
| PurinaCatChow |  |  |  |  |  |  | 0.019 | 0.054 |
| voatco |  |  |  |  |  |  | 0.000 | 0.054 |
| silverstein |  |  |  |  |  |  | 0.000 | 0.054 |
| ChelseaGrinUT |  |  |  |  |  |  | 0.000 | 0.054 |
| KianLawley |  |  |  |  |  |  | 0.000 | 0.054 |
| NYDailyNews |  |  |  |  |  |  | 0.000 | 0.054 |
| ginatrapani |  |  |  |  |  |  | 0.000 | 0.054 |
| GradeAUnderA |  |  |  |  |  |  | 0.000 | 0.054 |
| evernote |  |  |  |  |  |  | 0.000 | 0.054 |
| AsianGeekSquad |  |  |  |  |  |  | 0.000 | 0.054 |
| numberFire |  |  |  |  |  |  | 0.000 | 0.054 |
| amomontheside |  |  |  |  |  |  | 0.000 | 0.054 |
| luckytoddler |  |  |  |  |  |  | 0.000 | 0.054 |
| chuckpalahniuk |  |  |  |  |  |  | 0.000 | 0.054 |
| huffpostqueer |  |  |  |  |  |  | 0.001 | 0.054 |
| DanielleLW2B |  |  |  |  |  |  | 0.000 | 0.054 |
| craftymomof3 |  |  |  |  |  |  | 0.002 | 0.054 |
| kristinnw |  |  |  |  |  |  | 0.000 | 0.054 |
| ohmygoshbeck |  |  |  |  |  |  | 0.000 | 0.054 |
| JulsB20 |  |  |  |  |  |  | 0.000 | 0.054 |
| Mohawk_Home |  |  |  |  |  |  | 0.000 | 0.054 |
| beckvalleybooks |  |  |  |  |  |  | 0.000 | 0.054 |
| id_694945630561648641 |  |  |  |  |  |  | 0.012 | 0.054 |
| cestomina |  |  |  |  |  |  | 0.000 | 0.054 |
| Lil_Henstridge |  |  |  |  |  |  | 0.000 | 0.054 |
| AltNatParkSer |  |  |  |  |  |  | 0.000 | 0.054 |
| EarthPix |  |  |  |  |  |  | 0.000 | 0.054 |
| MarioLopezExtra |  |  |  |  |  |  | 0.000 | 0.054 |
| BrandsSayingBae |  |  |  |  |  |  | 0.000 | 0.054 |
| skilletmusic |  |  |  |  |  |  | 0.006 | 0.054 |
| Logan_RTW |  |  |  |  |  |  | 0.000 | 0.054 |
| Kellinquinn |  |  |  |  |  |  | 0.000 | 0.054 |
| UNICEF |  |  |  |  |  |  | 0.000 | 0.054 |
| Fergie |  |  |  |  |  |  | 0.000 | 0.054 |
| thegame |  |  |  |  |  |  | 0.000 | 0.054 |
| SaintsRow |  |  |  |  |  |  | 0.000 | 0.054 |
| fourzerotwo |  |  |  |  |  |  | 0.002 | 0.054 |
| IbottaApp |  |  |  |  |  |  | 0.000 | 0.054 |
| GreggDoyelStar |  |  |  |  |  |  | 0.000 | 0.054 |
| DamnHiIarious |  |  |  |  |  |  | 0.000 | 0.054 |
| jakefogelnest |  |  |  |  |  |  | 0.000 | 0.054 |
| Eagles |  |  |  |  |  |  | 0.000 | 0.054 |
| WayThingWorks |  |  |  |  |  |  | 0.000 | 0.054 |
| TerribleHerbst |  |  |  |  |  |  | 0.000 | 0.054 |
| madlib |  |  |  |  |  |  | 0.000 | 0.054 |
| bibbymoynihan |  |  |  |  |  |  | 0.000 | 0.054 |
| BenSPLATT |  |  |  |  |  |  | 0.000 | 0.054 |
| coin_comments |  |  |  |  |  |  | 0.000 | 0.054 |
| DominicScott |  |  |  |  |  |  | 0.000 | 0.054 |
| Top_DC |  |  |  |  |  |  | 0.002 | 0.054 |
| WeDestefani |  |  |  |  |  |  | 0.000 | 0.054 |
| ClimaWorld |  |  |  |  |  |  | 0.000 | 0.054 |
| thehumanxp |  |  |  |  |  |  | 0.004 | 0.054 |
| MattStoicSteady |  |  |  |  |  |  | 0.000 | 0.054 |
| JaimieAlexander |  |  |  |  |  |  | 0.000 | 0.054 |
| TheJeffBridges |  |  |  |  |  |  | 0.000 | 0.054 |
| Somecallmejon |  |  |  |  |  |  | 0.002 | 0.060 |
| LaughingSquid |  |  |  |  |  |  | 0.000 | 0.060 |
| grabpoints |  |  |  |  |  |  | 0.000 | 0.060 |
| LaMadelynn |  |  |  |  |  |  | 0.000 | 0.060 |
| GlamLifeGuru |  |  |  |  |  |  | 0.000 | 0.060 |
| EG_PPMD |  |  |  |  |  |  | 0.000 | 0.060 |
| derekwaterss |  |  |  |  |  |  | 0.000 | 0.060 |
| skyferreira |  |  |  |  |  |  | 0.000 | 0.060 |
| CalebShomo |  |  |  |  |  |  | 0.008 | 0.060 |
| TheWordAlive |  |  |  |  |  |  | 0.000 | 0.060 |
| jameyjasta |  |  |  |  |  |  | 0.000 | 0.060 |
| hatebreed |  |  |  |  |  |  | 0.000 | 0.060 |
| MemphisMayFire |  |  |  |  |  |  | 0.000 | 0.060 |
| Neil_Druckmann |  |  |  |  |  |  | 0.000 | 0.060 |
| thexfiles |  |  |  |  |  |  | 0.000 | 0.060 |
| attell |  |  |  |  |  |  | 0.000 | 0.060 |
| heidiklum |  |  |  |  |  |  | 0.000 | 0.060 |
| johntdrake |  |  |  |  |  |  | 0.000 | 0.060 |
| Gotham |  |  |  |  |  |  | 0.000 | 0.060 |
| OG_McSkillet |  |  |  |  |  |  | 0.000 | 0.060 |
| id_479809444 |  |  |  |  |  |  | 0.000 | 0.060 |
| LeafyIsHere |  |  |  |  |  |  | 0.000 | 0.060 |
| YABOYLILB |  |  |  |  |  |  | 0.000 | 0.060 |
| bgamegiveaway |  |  |  |  |  |  | 0.004 | 0.060 |
| therealRITTZ |  |  |  |  |  |  | 0.000 | 0.060 |
| jimjonescapo |  |  |  |  |  |  | 0.000 | 0.060 |
| naval |  |  |  |  |  |  | 0.006 | 0.060 |
| Kuvshinov_Ilya |  |  |  |  |  |  | 0.000 | 0.060 |
| jedwhedon |  |  |  |  |  |  | 0.000 | 0.060 |
| YahtzeeCroshaw |  |  |  |  |  |  | 0.000 | 0.060 |
| BoingBoing |  |  |  |  |  |  | 0.000 | 0.060 |
| NCAA |  |  |  |  |  |  | 0.000 | 0.060 |
| comicsalliance |  |  |  |  |  |  | 0.000 | 0.060 |
| InTheLittleWood |  |  |  |  |  |  | 0.000 | 0.060 |
| Akon |  |  |  |  |  |  | 0.000 | 0.060 |
| milanicosmetics |  |  |  |  |  |  | 0.000 | 0.060 |
| garywhitta |  |  |  |  |  |  | 0.000 | 0.060 |
| UniversalORL |  |  |  |  |  |  | 0.000 | 0.060 |
| pzf |  |  |  |  |  |  | 0.003 | 0.060 |
| MsAmberPRiley |  |  |  |  |  |  | 0.000 | 0.060 |
| ChristaBMiller |  |  |  |  |  |  | 0.000 | 0.060 |
| Ridd1e |  |  |  |  |  |  | 0.001 | 0.060 |
| TheReal_Jlh |  |  |  |  |  |  | 0.000 | 0.060 |
| HaveSippy |  |  |  |  |  |  | 0.000 | 0.060 |
| Hostess_Snacks |  |  |  |  |  |  | 0.000 | 0.060 |
| couponmomof4 |  |  |  |  |  |  | 0.000 | 0.060 |
| Wikipedia |  |  |  |  |  |  | 0.000 | 0.065 |
| bmthofficial |  |  |  |  |  |  | 0.000 | 0.065 |
| NHLFlyers |  |  |  |  |  |  | 0.000 | 0.065 |
| manofmanytastes |  |  |  |  |  |  | 0.003 | 0.065 |
| djkhaled |  |  |  |  |  |  | 0.000 | 0.065 |
| GA |  |  |  |  |  |  | 0.000 | 0.065 |
| ALT_DOJ |  |  |  |  |  |  | 0.000 | 0.065 |
| PatrickRothfuss |  |  |  |  |  |  | 0.000 | 0.065 |
| ANightOwlBlog |  |  |  |  |  |  | 0.000 | 0.065 |
| KenMarino |  |  |  |  |  |  | 0.004 | 0.065 |
| epitaphrecords |  |  |  |  |  |  | 0.000 | 0.065 |
| CBR |  |  |  |  |  |  | 0.000 | 0.065 |
| Yoshi1up |  |  |  |  |  |  | 0.000 | 0.065 |
| woodwatches_com |  |  |  |  |  |  | 0.010 | 0.065 |
| DrinkingQuest |  |  |  |  |  |  | 0.006 | 0.065 |
| alt_J |  |  |  |  |  |  | 0.000 | 0.065 |
| Gary_TheDog |  |  |  |  |  |  | 0.000 | 0.065 |
| standup |  |  |  |  |  |  | 0.000 | 0.065 |
| ItsGaryTime |  |  |  |  |  |  | 0.000 | 0.065 |
| crendor |  |  |  |  |  |  | 0.000 | 0.065 |
| DiDoodlings |  |  |  |  |  |  | 0.000 | 0.065 |
| Aerosmith |  |  |  |  |  |  | 0.000 | 0.065 |
| genesimmons |  |  |  |  |  |  | 0.003 | 0.065 |
| indieroyale |  |  |  |  |  |  | 0.000 | 0.065 |
| tweepi |  |  |  |  |  |  | 0.000 | 0.065 |
| slashdot |  |  |  |  |  |  | 0.000 | 0.065 |
| chronicdevteam |  |  |  |  |  |  | 0.000 | 0.065 |
| iphone_dev |  |  |  |  |  |  | 0.000 | 0.065 |
| Brittanysnow |  |  |  |  |  |  | 0.000 | 0.065 |
| ASAPYams |  |  |  |  |  |  | 0.001 | 0.065 |
| _stumbler |  |  |  |  |  |  | 0.000 | 0.065 |
| coloritcom |  |  |  |  |  |  | 0.000 | 0.065 |
| AXE |  |  |  |  |  |  | 0.000 | 0.065 |
| TristanGHill |  |  |  |  |  |  | 0.000 | 0.065 |
| SavingMichele |  |  |  |  |  |  | 0.000 | 0.065 |
| AlanFelyk |  |  |  |  |  |  | 0.001 | 0.065 |
| JimOHeir |  |  |  |  |  |  | 0.000 | 0.065 |
| MichaelKeaton |  |  |  |  |  |  | 0.000 | 0.065 |
| redbullesports |  |  |  |  |  |  | 0.002 | 0.065 |
| marieclaire |  |  |  |  |  |  | 0.000 | 0.065 |
| breakingbenj |  |  |  |  |  |  | 0.000 | 0.071 |
| p0sixninja |  |  |  |  |  |  | 0.000 | 0.071 |
| Nigel_Farage |  |  |  |  |  |  | 0.000 | 0.071 |
| EscapeTheFate |  |  |  |  |  |  | 0.000 | 0.071 |
| MzKatieCassidy |  |  |  |  |  |  | 0.003 | 0.071 |
| allinwithchris |  |  |  |  |  |  | 0.000 | 0.071 |
| newtgingrich |  |  |  |  |  |  | 0.002 | 0.071 |
| SarahPalinUSA |  |  |  |  |  |  | 0.000 | 0.071 |
| ChrisPirillo |  |  |  |  |  |  | 0.000 | 0.071 |
| abdashsoul |  |  |  |  |  |  | 0.000 | 0.071 |
| JW1 |  |  |  |  |  |  | 0.000 | 0.071 |
| RajonRondo |  |  |  |  |  |  | 0.006 | 0.071 |
| jules_su |  |  |  |  |  |  | 0.000 | 0.071 |
| BryanFuller |  |  |  |  |  |  | 0.000 | 0.071 |
| janedeals |  |  |  |  |  |  | 0.000 | 0.071 |
| Lindt_Chocolate |  |  |  |  |  |  | 0.000 | 0.071 |
| tylerhoechlin |  |  |  |  |  |  | 0.000 | 0.071 |
| MingNa |  |  |  |  |  |  | 0.000 | 0.071 |
| thorofficial |  |  |  |  |  |  | 0.000 | 0.071 |
| WakeupPeopIe |  |  |  |  |  |  | 0.000 | 0.071 |
| Reviewanygame |  |  |  |  |  |  | 0.000 | 0.071 |
| JoelGHodgson |  |  |  |  |  |  | 0.000 | 0.071 |
| ShinobiNinja |  |  |  |  |  |  | 0.000 | 0.071 |
| mjkeenan |  |  |  |  |  |  | 0.000 | 0.071 |
| machavelli7 |  |  |  |  |  |  | 0.000 | 0.071 |
| WebMD |  |  |  |  |  |  | 0.000 | 0.071 |
| JimCameron |  |  |  |  |  |  | 0.000 | 0.071 |
| Tropicana |  |  |  |  |  |  | 0.000 | 0.071 |
| IAMJHUD |  |  |  |  |  |  | 0.000 | 0.071 |
| GarySinise |  |  |  |  |  |  | 0.000 | 0.071 |
| zuandoemkta |  |  |  |  |  |  | 0.000 | 0.071 |
| AleaMilham |  |  |  |  |  |  | 0.000 | 0.071 |
| Stonekettle |  |  |  |  |  |  | 0.000 | 0.077 |
| SippyCupMom |  |  |  |  |  |  | 0.000 | 0.077 |
| gustosagiveaway |  |  |  |  |  |  | 0.000 | 0.077 |
| PoshJournalBlog |  |  |  |  |  |  | 0.000 | 0.077 |
| IHGiveaways |  |  |  |  |  |  | 0.000 | 0.077 |
| themamareport |  |  |  |  |  |  | 0.000 | 0.077 |
| PCSpecialist |  |  |  |  |  |  | 0.005 | 0.077 |
| gatesfoundation |  |  |  |  |  |  | 0.000 | 0.077 |
| StreetFighter |  |  |  |  |  |  | 0.000 | 0.077 |
| ArcadeSushi |  |  |  |  |  |  | 0.000 | 0.077 |
| candicepatton |  |  |  |  |  |  | 0.000 | 0.077 |
| dpanabaker |  |  |  |  |  |  | 0.000 | 0.077 |
| MohamedMOSalih |  |  |  |  |  |  | 0.000 | 0.077 |
| Khanoisseur |  |  |  |  |  |  | 0.000 | 0.077 |
| slipknot |  |  |  |  |  |  | 0.007 | 0.077 |
| paparoach |  |  |  |  |  |  | 0.000 | 0.077 |
| lacroixwater |  |  |  |  |  |  | 0.000 | 0.077 |
| MickJagger |  |  |  |  |  |  | 0.000 | 0.077 |
| RawStory |  |  |  |  |  |  | 0.000 | 0.077 |
| MattBennett |  |  |  |  |  |  | 0.000 | 0.077 |
| i0n1c |  |  |  |  |  |  | 0.000 | 0.077 |
| patricknorton |  |  |  |  |  |  | 0.000 | 0.077 |
| OfficeGovEthics |  |  |  |  |  |  | 0.000 | 0.077 |
| OurNameIsFun |  |  |  |  |  |  | 0.000 | 0.077 |
| HarvestSnaps |  |  |  |  |  |  | 0.000 | 0.077 |
| HoustonTexans |  |  |  |  |  |  | 0.000 | 0.077 |
| brax1wnl |  |  |  |  |  |  | 0.000 | 0.077 |
| patriot_viper |  |  |  |  |  |  | 0.000 | 0.077 |
| AltUSFWSRefuge |  |  |  |  |  |  | 0.000 | 0.077 |
| bessbell |  |  |  |  |  |  | 0.000 | 0.077 |
| Susan_Hennessey |  |  |  |  |  |  | 0.000 | 0.077 |
| PetMagasin |  |  |  |  |  |  | 0.000 | 0.077 |
| SophiaBush |  |  |  |  |  |  | 0.000 | 0.077 |
| BHGLiveBetter |  |  |  |  |  |  | 0.000 | 0.077 |
| AphexTwin |  |  |  |  |  |  | 0.000 | 0.083 |
| ProjectMGame |  |  |  |  |  |  | 0.000 | 0.083 |
| LukeCage |  |  |  |  |  |  | 0.000 | 0.083 |
| Vikings |  |  |  |  |  |  | 0.005 | 0.083 |
| Caddicarus |  |  |  |  |  |  | 0.004 | 0.083 |
| riserecords |  |  |  |  |  |  | 0.000 | 0.083 |
| id_266791973 |  |  |  |  |  |  | 0.000 | 0.083 |
| ddkesports |  |  |  |  |  |  | 0.000 | 0.083 |
| AgentM |  |  |  |  |  |  | 0.000 | 0.083 |
| ShuttleCDRKelly |  |  |  |  |  |  | 0.000 | 0.083 |
| ObamaMalik |  |  |  |  |  |  | 0.000 | 0.083 |
| innocence |  |  |  |  |  |  | 0.000 | 0.083 |
| shoryukendotcom |  |  |  |  |  |  | 0.003 | 0.083 |
| SerebiiNet |  |  |  |  |  |  | 0.000 | 0.083 |
| scullymike |  |  |  |  |  |  | 0.003 | 0.083 |
| ReinaScully |  |  |  |  |  |  | 0.000 | 0.083 |
| edzelyago |  |  |  |  |  |  | 0.000 | 0.083 |
| michaelpachter |  |  |  |  |  |  | 0.000 | 0.083 |
| IamStevenT |  |  |  |  |  |  | 0.000 | 0.083 |
| HotTopic |  |  |  |  |  |  | 0.000 | 0.083 |
| nojumper |  |  |  |  |  |  | 0.044 | 0.083 |
| Blue______Wave |  |  |  |  |  |  | 0.000 | 0.083 |
| davedays |  |  |  |  |  |  | 0.000 | 0.083 |
| TwitterSafety |  |  |  |  |  |  | 0.000 | 0.083 |
| HeLoEnterprises |  |  |  |  |  |  | 0.012 | 0.083 |
| TechN9ne |  |  |  |  |  |  | 0.000 | 0.083 |
| CHRIS_Daughtry |  |  |  |  |  |  | 0.000 | 0.083 |
| VerizonDeals |  |  |  |  |  |  | 0.000 | 0.083 |
| MomCentral |  |  |  |  |  |  | 0.000 | 0.083 |
| BoredElonMusk |  |  |  |  |  |  | 0.000 | 0.089 |
| HayleyKiyoko |  |  |  |  |  |  | 0.000 | 0.089 |
| KeithPowell |  |  |  |  |  |  | 0.015 | 0.089 |
| AndyKindler |  |  |  |  |  |  | 0.000 | 0.089 |
| TheDefenders |  |  |  |  |  |  | 0.000 | 0.089 |
| gootecks |  |  |  |  |  |  | 0.000 | 0.089 |
| crosscountertv |  |  |  |  |  |  | 0.000 | 0.089 |
| BlogWithMom |  |  |  |  |  |  | 0.000 | 0.089 |
| ellenblogs |  |  |  |  |  |  | 0.000 | 0.089 |
| jastusa |  |  |  |  |  |  | 0.000 | 0.089 |
| missjudygreer |  |  |  |  |  |  | 0.000 | 0.089 |
| TheVulcanSalute |  |  |  |  |  |  | 0.009 | 0.089 |
| jspring86az |  |  |  |  |  |  | 0.000 | 0.089 |
| SmoshIan |  |  |  |  |  |  | 0.000 | 0.089 |
| TwoPaddocks |  |  |  |  |  |  | 0.000 | 0.089 |
| SunandSipCups |  |  |  |  |  |  | 0.000 | 0.089 |
| SirScoots |  |  |  |  |  |  | 0.000 | 0.089 |
| ItsTheSituation |  |  |  |  |  |  | 0.000 | 0.089 |
| MrScottEddy |  |  |  |  |  |  | 0.000 | 0.089 |
| NeYoCompound |  |  |  |  |  |  | 0.000 | 0.089 |
| katharinemcphee |  |  |  |  |  |  | 0.000 | 0.089 |
| RichelleMead |  |  |  |  |  |  | 0.000 | 0.094 |
| Trade4Cashcom |  |  |  |  |  |  | 0.000 | 0.094 |
| robinlordtaylor |  |  |  |  |  |  | 0.000 | 0.094 |
| StandUpRepublic |  |  |  |  |  |  | 0.000 | 0.094 |
| TeamFortress |  |  |  |  |  |  | 0.011 | 0.094 |
| SWStheband |  |  |  |  |  |  | 0.000 | 0.094 |
| karaswisher |  |  |  |  |  |  | 0.000 | 0.094 |
| Time4mommy |  |  |  |  |  |  | 0.001 | 0.094 |
| someecards |  |  |  |  |  |  | 0.000 | 0.094 |
| kassemg |  |  |  |  |  |  | 0.000 | 0.094 |
| BDisgusting |  |  |  |  |  |  | 0.000 | 0.094 |
| OfficialWillow |  |  |  |  |  |  | 0.000 | 0.094 |
| TheRealMikeEpps |  |  |  |  |  |  | 0.000 | 0.094 |
| BadMiiversePost |  |  |  |  |  |  | 0.022 | 0.100 |
| jamieleecurtis |  |  |  |  |  |  | 0.001 | 0.100 |
| NoToFeminism |  |  |  |  |  |  | 0.000 | 0.100 |
| AnneRiceAuthor |  |  |  |  |  |  | 0.004 | 0.100 |
| laurenbabic |  |  |  |  |  |  | 0.000 | 0.100 |
| LukeHolland |  |  |  |  |  |  | 0.000 | 0.100 |
| HereIsGina |  |  |  |  |  |  | 0.006 | 0.100 |
| gruber |  |  |  |  |  |  | 0.000 | 0.100 |
| MacRumors |  |  |  |  |  |  | 0.008 | 0.100 |
| GunnerGale |  |  |  |  |  |  | 0.000 | 0.100 |
| RogueSNRadvisor |  |  |  |  |  |  | 0.000 | 0.100 |
| GwynethPaltrow |  |  |  |  |  |  | 0.000 | 0.100 |
| bloomplanners |  |  |  |  |  |  | 0.000 | 0.100 |
| somedaypicks |  |  |  |  |  |  | 0.000 | 0.100 |
| focusattack |  |  |  |  |  |  | 0.006 | 0.100 |
| NVIDIAGeForceUK |  |  |  |  |  |  | 0.011 | 0.106 |
| anthonypadilla |  |  |  |  |  |  | 0.000 | 0.106 |
| AshleySmashlaay |  |  |  |  |  |  | 0.000 | 0.106 |
| realrobbwells |  |  |  |  |  |  | 0.004 | 0.106 |
| RealKiefer |  |  |  |  |  |  | 0.000 | 0.106 |
| razzadoop |  |  |  |  |  |  | 0.000 | 0.112 |
| PlaytonicGames |  |  |  |  |  |  | 0.000 | 0.112 |
| SlickWraps |  |  |  |  |  |  | 0.000 | 0.112 |
| trailerparkboys |  |  |  |  |  |  | 0.000 | 0.112 |
| AngelaKinsey |  |  |  |  |  |  | 0.012 | 0.112 |
| evgagaming |  |  |  |  |  |  | 0.000 | 0.112 |
| EnviroNews |  |  |  |  |  |  | 0.012 | 0.112 |
| Pouyalilpou |  |  |  |  |  |  | 0.000 | 0.112 |
| bep |  |  |  |  |  |  | 0.000 | 0.118 |
| bellathorne |  |  |  |  |  |  | 0.000 | 0.118 |
| catsu |  |  |  |  |  |  | 0.000 | 0.118 |
| kasthomas |  |  |  |  |  |  | 0.000 | 0.118 |
| ederosia |  |  |  |  |  |  | 0.000 | 0.123 |
| KristianNairn |  |  |  |  |  |  | 0.000 | 0.123 |
| ThatChrisGore |  |  |  |  |  |  | 0.000 | 0.123 |
| YtThumbnails |  |  |  |  |  |  | 0.000 | 0.123 |
| ROCCAT |  |  |  |  |  |  | 0.000 | 0.123 |
| davemorrissey64 |  |  |  |  |  |  | 0.000 | 0.123 |
| wheezywaiter |  |  |  |  |  |  | 0.000 | 0.123 |
| JeffParshley |  |  |  |  |  |  | 0.013 | 0.135 |
| Ridiculousness |  |  |  |  |  |  | 0.078 | 0.141 |
| samstein |  |  |  |  |  |  | 0.012 | 0.146 |
| WCGamingTweets |  |  |  |  |  |  | 0.000 | 0.158 |
| AmiiboNews |  |  |  |  |  |  | 0.000 | 0.164 |
